# Supplementary material for: Critical role for Piccolo in synaptic vesicle retrieval
Source: eLife. 2019 May 10;8:e46629. doi: 10.7554/eLife.46629 (PMC6541439; doi:10.7554/eLife.46629)
Supplement: Figure 1—source data 1. [file elife-46629-fig1-data1.xlsx]

## Sheet: Fig. 1 E
normalized Piccolo intensity at VGLut1 puncta
Pclowt/wt	Pclogt/gt
0.547586	0.467325
0.475936	0.221905
0.619457	0.316739
0.749067	0.591084
0.561165	0.432659
0.613495	0.317622
0.918752	0.359795
0.750723	0.410579
0.84379	0.304043
0.493711	0.396117
0.242108	0.480683
1.06834	0.484658
0.709985	0.327668
1.68581	0.500445
1.08943	0.548359
0.433101	0.366419
0.723564	0.723564
0.855493	0.248843
0.780752	0.533565
0.990181	0.11857
0.714291	0.481787
0.350411	0.0983668
0.714732	0.629724
0.609631	0.535221
0.100575	0.677638
1.03931	0.16273
0.0627074	0.352619
1.20116	0.439725
1.72534	0.305478
0.489626	0.430341
0.392694	0.502543
0.897887	0.346216
0.644297	0.431666
1.00288	0.364101
0.63414	0.175978
0.190662	0.243433
0.718596	0.316739
0.626412	0.358029
0.810449	0.437406
0.457389	0.194857
0.97594	0.472403
0.57077	0.520538
1.70491	0.290132
1.46833	0.378894
0.424931	0.500335
1.67764	0.524844
1.23119	0.187129
0.600357	0.232062
0.599695	0.208546
0.897666	0.0440498
1.76817	0.211638
0.568893	0.106978
1.24112	0.39435
2.14243	0.478144
1.28109	0.257895
1.50476	0.596052
1.51547	0.164938
0.934429	0.223561
1.34181	0.382206
1.1942	0.354054
1.24808	0.25646
2.08248	0.315524
1.48798	0.258779
1.87659	0.280196
1.65181	0.157321
0.673001	0.316849
1.86246	0.278871
0.392915	0.254694
0.997689	0.106868
0.361341	0.431555
0.206338	0.36664
0.231399	0.427691
0.128616	0.269377
0.44933	0.0831315
0.486976	0.205014
0.170789	0.248843
0.629172	0.211527
1.17002	0.238354
0.803163	0.127954
1.03015	0.160191
0.517005	0.4246
1.64165	0.398546
0.628841	0.305699
0.53765	0.331422
0.44679	0.545378
0.3694	0.356152
0.606981	0.502432
1.48113	0.43564
0.947015	0.41621
0.424821	0.373705
0.914447	0.442706
0.224886	0.0834627
0.387726	0.0500114
1.01679	0.166705
0.666819	0.263195
1.71761	0.260876
0.208546	0.0394129
0.759444	0.0518882
0.0737475	0.231068
0.297088	0.0775011
1.36333	0.139877
1.02098	0.0550898
0.833192	0.0907491
1.57972	0.501991
0.599585	0.536104
0.970751	0.309232
1.60412	0.0483554
1.65777	0.482119
0.919856	0.471962
0.434646	0.550898
0.672118	0.437075
0.164386	0.306251
1.02396	0.46876
1.16108	0.42725
0.094282	0.399318
0.448778	0.227204
1.42494	0.301945
1.0817	0.242771
0.737916	0.381654
0.854278	0.346326
0.75823	0.0294769
1.66296	0.232393
0.759334	0.165159
1.57817	0.422944
0.163172	0.20391
1.07983	0.156769
0.124311	0.246855
0.759444	0.310667
0.734825	0.0379777
0.744982	0.249395
0.911797	0.567569
0.860019	0.372049
0.992279	0.562601
0.64783	0.395344
0.281079	0.250609
0.335728	0.483995
0.767172	0.113492
0.652908	0.0289249
0.756132	0.213625
0.784837	0.0692211
0.666929	0.0429458
0.760107	0.0319057
0.601461	0.153457
1.22953	0.0940612
1.34567	0.128837
0.674988	0.373153
1.02904	0.130272
0.580375	0.0451538
0.704134	0.302276
0.521311	0.486424
0.567017	0.632926
1.14772	0.442926
1.18427	0.318616
1.52739	0.0492386
0.972848	0.428243
0.71948	0.35847
0.745644	0.702036
0.615482	0.284723
1.0955	0.300289
1.47572	0.458603
0.114264	0.544936
0.270371	0.416099
1.89116	0.186466
1.81001	0.495808
0.56514	0.994045
1.45342	0.527604
2.71684	0.522415
0.382979	0.468208
2.01613	0.356262
1.37084	0.387174
1.8141	0.205897
2.92981	0.137559
1.53909	0.24807
0.918531	0.354937
1.34578	0.549573
3.38466	0.312544
0.371387	0.558074
0.191655	0.480131
2.23958	0.494704
2.40883	0.339371
2.58359	0.262201
1.43046	0.597929
1.10963	0.043829
1.57188	0.472183
1.23417	0.397773
1.38398	0.541735
2.16716	0.589869
0.161185	0.572095
2.68317	0.225106
2.39801	0.55156
0.331422	0.55973
1.84523	0.636017
0.847544	0.618022
2.51051	0.28958
1.38299	0.464123
2.2674	0.629393
1.02915	0.551671
0.227646	0.45761
1.65987	0.443147
0.172666	0.557412
1.35517	0.679956
0.713628	0.238244
0.75812	0.211527
0.266507	0.632263
1.85119	0.142969
1.72909	0.0866643
1.45254	0.117687
2.0699	0.469202
1.80714	0.29499
2.31311	0.621002
1.44856	0.0968212
1.22412	0.198721
1.4776	0.316739
3.34171	0.0681171
0.50453	0.31442
3.15502	0.54593
2.37085	0.488963
0.327116	0.0779427
1.13735	0.6093
0.424158	0.343566
1.277	0.440939
0.191766	0.608527
2.5147	0.555535
0.985434	0.304043
0.146612	0.422834
0.65357	0.708219
1.51602	0.593844
0.954853	0.522194
0.53224	0.53489
1.17919	0.469975
0.299627	0.337715
2.29567	0.133364
2.17025	0.322811
2.01746	0.227535
1.72501	0.278099
1.16141	0.240673
1.61692	0.393467
1.81565	0.189447
0.767724	0.278871
1.42582	0.209209
1.07298	0.20402
1.0498	0.444693
0.186577	0.0604994
1.675	0.12685
1.38895	0.359353
0.766841	0.204793
0.307024	0.227646
0.248291	0.188785
0.0343345	0.146722
0.227756	0.0899763
0.0748515	0.130383
0.341027	0.345995
0.31442	0.094282
0.263636	0.0645842
0.211858	0.319609
0.323142	0.22047
0.443699	0.302166
0.845557	0.189558
0.356704	0.0524402
0.0873267	0.377238
1.03489	0.113492
0.653018	0.392694
0.390597	0.149372
0.176089	0.101789
0.796539	0.213956
0.684703	0.406936
0.387947	0.0783843
0.240011	0.215281
0.318395	0.0384193
1.22986	0.552554
0.0618242	0.0878787
0.427029	0.120888
0.389934	0.141644
0.785609	0.338046
0.762425	0.476709
0.189447	0.573089
1.04218	0.272689
0.323473	0.735488
0.19585	0.313758
0.300289	0.0811443
0.442264	0.265513
0.311992	0.24542
0.283067	0.274124
1.13436	0.2537
0.128616	0.179732
0.304043	0.336832
0.167809	0.462467
0.198169	0.222126
0.631049	0.409144
0.545599	0.403072
0.270371	0.392363
1.31774	0.676313
0.182492	0.306582
0.589538	0.655337
0.897555	0.668806
2.83144	0.306361
1.14275	0.263636
0.50994	0.39965
0.118128	0.430562
1.19674	0.258116
0.924935	0.502211
0.816853	0.40517
0.11018	0.522967
0.892919	0.42471
0.692983	0.237471
0.304595	0.601351
1.6867	0.206338
1.21772	0.49084
2.50631	0.263967
1.11438	0.198942
1.0413	0.170017
0.530364	0.0511154
0.17642	0.119674
1.20988	0.272689
1.56106	0.130824
0.242329	0.057629
0.237471	0.112277
1.76045	0.180725
0.627958	0.301724
1.45397	0.569225
0.936527	0.785168
1.33971	0.257564
0.165601	0.218593
0.098698	0.411904
0.164276	0.598701
0.44381	0.728422
1.17323	0.168029
0.0292561	0.799409
3.08724	0.205786
0.167698	0.869072
0.429458	0.202143
0.969978	0.597487
1.37349	0.503315
1.57486	0.729195
0.195961	0.458493
1.22964	0.0882099
1.1347	0.312102
2.44382	0.40539
0.911135	0.363769
1.93333	0.268052
0.855272	0.0667923
0.367413	0.917648
0.330208	0.207663
2.59364	0.128837
2.98258	0.891373
1.3651	0.325571
2.98788	0.258999
2.61185	0.246966
0.263195	0.233497
1.11891	0.62034
0.553327	0.199383
1.65711	0.183265
0.92372	0.70038
0.712855	0.0651362
0.632263	0.213956
0.577615	0.528376
0.764854	0.122434
1.09241	0.108634
0.764192	0.160743
1.06901	0.275007
1.20745	0.184921
0.854278	0.265734
0.590753	0.556639
0.765406	0.528928
1.31509	0.327116
0.910141	0.151138
1.29654	0.398104
1.00464	0.180284
0.489847	0.134026
0.937189	0.128948
1.22876	0.0627074
1.24443	0.363217
1.99957	1.0286
0.72224	0.0748515
1.47528	0.363659
1.4458	0.236036
2.66253	0.107861
1.49063	0.73074
1.62421	0.117466
2.01403	0.152794
1.07265	0.210754
1.23406	0.335617
1.12222	0.121661
1.47771	0.627737
0.569445	0.205345
0.788259	0.211306
1.32293	0.435309
1.14563	0.0991396
0.954191	0.0536546
0.72246	0.227314
1.03556	0.0575186
0.747632	0.224665
0.868189	0.0835731
0.693425	0.682606
0.725883	0.156217
0.668364	0.458935
1.26574	0.24266
0.365094	0.57342
0.105984	0.203468
0.378784	0.27843
1.45132	0.409806
0.777881	0.059285
0.774017	0.101568
0.538533	0.29764
2.49604	0.0875475
1.7207	0.116362
2.66175	0.30051
1.79776	0.238134
1.65214	0.324908
1.4277	0.53765
1.01933	0.263305
1.42549	0.32259
1.53468	0.182602
0.384193	0.577725
0.499672	0.1985
0.422944	0.318395
1.05289	0.591415
1.3078	0.192759
0.404618	0.276222
1.81984	0.570108
0.481898	0.449109
1.56835	0.314972
0.4936	0.639108
1.51436	0.343787
2.32172	0.50718
1.02176	0.73615
0.594396	0.615372
0.473176	0.588103
1.46833	0.707667
1.64	0.532792
0.556639	0.381985
1.24167	0.736812
1.47782	0.552112
1.30019	0.559509
1.52463	0.284943
1.42803	0.484768
1.47451	1.15291
1.39049	0.383531
0.284943	0.9182
1.10599	0.820385
0.753924	0.403955
1.62035	1.08292
1.54848	0.611618
1.36433	0.699497
1.73825	1.02165
1.95784	0.989629
0.806696	0.68382
0.847544	1.27038
0.950989	0.994818
1.52949	0.30062
0.83529	0.30316
0.624756	0.767393
0.585674	0.755249
0.706121	0.555645
0.536546	0.747411
0.209982	0.854058
0.304705	0.845226
0.234932	0.866312
0.431997	0.718044
0.347099	0.799961
0.923058	0.78848
0.389934	0.590311
0.355158	1.11681
0.0654674	1.15457
0.853616	0.538644
0.219366	0.142858
0.34456	0.0936196
0.361009	0.379557
0.372049	0.394902
0.845778	0.391149
0.731292	0.558847
2.07001	0.61747
1.39248	0.872384
0.283508	0.396227
1.83066	0.488743
1.73549	0.284502
1.31719	0.413891
1.57023	0.509608
1.82216	0.142417
1.11096	0.316076
0.174874	0.121661
1.55102	0.202364
2.15568	0.330428
0.209761	0.313868
1.92881	0.232393
0.308238	0.323804
0.111615	0.0854499
1.83022	0.0593954
0.691327	0.441381
1.84291	0.335617
2.09706	0.359574
1.24322	0.287262
1.08601	0.552996
2.09264	0.399208
0.773576	0.0295873
1.71728	0.420736
1.68681	0.537429
1.05874	0.415106
1.46833	0.229081
1.13105	0.349749
0.92361	0.217268
0.708329	0.266617
1.78297	0.318284
0.655447	0.157983
1.07828	0.202806
1.2642	0.09925
1.35296	0.202916
1.63371	0.163282
1.07961	0.101568
1.66252	0.198279
0.296204	0.0999124
1.04306	0.318616
0.806585	0.220028
1.43465	0.234932
0.916103	0.147716
1.13094	0.265623
1.09109	0.265182
0.661409	0.353061
0.874371	0.140429
2.31278	0.247076
1.07905	0.216164
2.42892	0.372601
0.501328	0.248291
0.358912	0.124863
0.522746	0.272137
0.527052	0.208546
1.40805	0.207442
1.30261	0.307355
0.890711	0.422613
0.795435	0.207222
0.982343	0.340475
1.42096	0.225438
1.15269	0.240011
0.637231	0.254142
0.956399	0.428243
2.24488	0.306582
1.12233	0.211858
2.03876	0.301172
1.23328	0.0839043
2.63901	0.265071
0.351515	0.176861
0.983447	0.282956
0.230626	0.300841
0.953308	0.0628178
0.0756243	0.670572
0.124752	0.552996
0.619567	0.135903
0.720473	0.31431
1.73881	0.366198
0.764964	0.09373
1.25448	0.225548
1.12951	0.162509
0.661409	0.179069
1.53567	0.189226
0.874261	0.245089
0.804819	0.376134
0.596052	0.145287
0.227314	0.134026
0.797312	0.0690003
1.18901	0.0759555
0.507621	0.0556418
0.642751	0.509388
1.46027	0.495698
0.240563	0.298081
0.791129	0.0423938
1.72997	0.0761763
0.753704	0.332857
0.555976	0.285937
0.865539	0.491392
0.857701	0.211527
0.174874	0.239238
1.51977	0.269046
1.01745	0.711641
0.947567	0.454519
0.960594	0.481235
0.776888	0.331201
0.68658	0.39159
0.21793	0.571874
1.24962	0.67002
0.720584	0.442154
1.06139	0.46324
1.17256	0.367413
1.74532	0.31994
0.432659	0.413339
2.56162	0.3004
0.192097	0.372049
	0.399981
	0.238796
	0.326123
	0.24807
	0.404066
	0.39976
	0.349086
	0.596383
	0.169465
	0.386401
	0.530584
	0.887178
	0.059285
	0.326123
	0.767393
	0.433542
	0.175978
	0.74995
	0.299848
	0.621002
	0.190441
	0.569556
	0.279092
	0.148157
	0.414112
	0.510933
	0.244206
	0.134909
	0.194305
	0.62851
	0.132701
	0.207884
	0.0423938
	0.0771699
	0.0448226
	0.0794883
	0.0271585
	0.0464786
	0.0370945
	0.0853395
	0.247959
	0.268273
	0.635686
	0.466221
	0.428685
	0.698393
	0.0138001
	0.859467
	0.0896451
	0.459266
	0.511375
	0.58733
	0.197175
	0.395565
	0.340475
	0.391811
	0.313758
	0.0734163
	0.69475
	0.604442
	0.316076
	0.211086
	0.417203
	0.375361
	0.384193
	0.311992
	0.318836
	0.0802611
	0.222567
	0.284502
	0.357366
	0.411242
	0.280638
	0.0775011
	0.0610514
	0.511485
	0.51546
	0.819502
	0.400422
	0.144293
	0.052109
	0.28406
	0.20391
	1.00001
	0.252596
	0.537098
	0.294438
	0.282404
	0.315304
	0.183485
	0.207663
	0.235153
	0.308569
	0.241004
	0.0808131
	0.452421
	0.395013
	0.0737475
	0.145618
	0.502763
	0.22621
	0.359022
	0.12674
	0.332195
	0.954301
	0.341248
	0.599585
	0.658207
	0.278871
	0.220359
	0.321155
	0.263195
	0.398987
	0.43288
	0.699166
	0.750612
	0.461915
	0.503978
	0.569225
	0.273683
	0.695523
	0.227866
	0.317732
	0.193642
	0.0862227
	0.174985
	0.395675
	0.126629
	0.144845
	0.113381
	0.208657
	0.141423

## Sheet: Fig. 1 G
	dynamin				VGlut1				synaptophysin				Rab5				Rab7				EEA1				bassoon
Pclowt/wt	0.81295	0.988348	1.1987		0.950538	1.10238	0.947083		1.10204	1.13275	1.0775	0.687712	1.18965	1.05925	1.00162	0.74948	0.925114	0.899123	1.25462	0.921144	0.971369	1.02863			1.16838	0.945414	1.06481	0.821395
Pclowt/gt	1.69823	1.46221	1.15337		1.33857	0.853515	0.954943		0.976766	1.20083	0.655349	0.667916	0.769408	1.09911	0.994839	1.29179	1.28995	1.10164	1.33653	1.18459	0.452369	0.425847			1.10374	1.12978	0.471662	1.08037
Pclogt/gt	1.09264	1.15326	1.25171		0.589912	0.92313	0.976997		0.618104	0.363327	0.964064	1.34128	1.30239	1.10309	1.26498	1.22014	0.839019	1.05329	0.462939	0.948355	0.512109	0.481368			0.477133	0.67409	1.21278	0.847513

## Sheet: Fig. 1 I
synapse number / um length of dendrite
Pclowt/wt	Pclogt/gt
0.321811	0.253936
0.128427	0.342919
0.429039	0.305306
0.400595	0.399263
0.424211	0.544052
0.198186	0.197219
0.294118	0.286474
0.325321	0.22425
0.335751	0.233123
0.428829	0.321319
0.286926	0.253449
0.237535	0.312549
0.263257	0.40384
0.133815	0.379564
0.220459	0.203983
0.268649	0.27481
0.124425	0.306566
0.270197	0.283482
0.247651	0.304803
0.272782	0.215619
0.21277	0.234306
0.17999	0.137444
0.296516
0.294308
0.226742
0.157745
0.175039
