# Supplementary material for: Critical role for Piccolo in synaptic vesicle retrieval
Source: eLife. 2019 May 10;8:e46629. doi: 10.7554/eLife.46629 (PMC6541439; doi:10.7554/eLife.46629)
Supplement: Figure 2—source data 1. [file elife-46629-fig2-data1.xlsx]

## Sheet: Fig. 2 C
SVs / synaptic terminal
Pclowt/wt	Pclogt/gt
30	22
32	51
123	21
55	12
61	16
70	57
148	25
76	11
56	31
12	30
39	30
27	14
25	21
75	76
34	22
31	71
59	111
44	43
87	8
49	6
96	27
28	33
57	35
34	23
23	28
50	29
105	32
41	29
44	20
46	16
132	65
18	55
18	55
24	1
19	47
33	34
59	49
34	44
42	8
54	66
60	54
71	112
91	58
48	42
38	18
40	5
26	8
52	57
39	38
51	34
43	21
41	59
	85
	47
	84
	47
	21
	39
	44

## Sheet: Fig. 2 D
docked SVs / AZ
Pclowt/wt	Pclogt/gt
2	2
2	1
2	1
0	1
1	3
2	2
3	1
0	2
2	2
1	1
0	2
1	3
4	4
6	2
1	3
0	1
0	2
0	0
6	3
2	0
3	1
1	3
1	3
0	2
2	0
4	2
1	2
0	1
3	2
3	0
0	1
0	2
3	3
0	2
1	0
2	4
2	0
1	0
1	2
1	1
0
0
1
2
1
0
1
0
1
3
2
1
1
1
3
3
2
1
1

## Sheet: Fig. 2. E
PSD length (nm)
Pclowt/wt	Pclogt/gt
227.515	259.578
703.746	299.683
371.294	173.638
393.385	240.743
179.776	253.986
282	452.195
543.12	396.106
186.14	387.312
318.519	289.703
333.558	267.067
255.88	291.473
218.755	311.034
917.048	417.625
566.436	419.491
538.129	404.525
268.852	459.255
361.421	409.689
406.783	702.292
269.531	525.343
273.933	856.246
272.101	408.565
401.745	489.367
298.949	329.872
211.785	588.969
259.799	244.68
616.478	355.319
304.642	387.423
435.618	281.545
312.003	97.361
287.929	181.098
346.829	478.851
171.903	193.968
151.073	343.216
412.466	519.965
277.879	344.704
171.618	383.974
464.519	256.774
291.495	891.796
395.859	431.611
233.234	232.549
233.755	542.825
235.493	223.559
368.842	505.601
149.18	452.22
214.697	297.241
334.049	242.432
386.189	337.033
263.007	524.235
182.218	167.322
544.294	251.855
203.858	381.367
205.203	268.408
205.99	638.398
365.554	231.602
469.222	528.648
284.432	343.446
318.312	342.1
444.118	382.829
253.235	684.874
297.627	305.909
206.76	558.56
149.396	356.568
407.565	410.109
457.453	306.455
163.499	322.991
326.207	338.05
633.287	418.344
313.122	208.506
560.856	363.599
346.161
153.565
221.379

## Sheet: Fig. 2 F
endosome structures / terminal
Pclowt/wt	Pclogt/gt
1	1
1	1
6	1
1	3
2	5
3	1
2	9
0	0
1	4
2	0
2	4
0	2
0	0
0	0
0	3
2	5
0	0
0	2
3	0
0	0
1	1
1	11
0	9
2	8
0	5
1	3
7	3
0	0
0	2
0	4
0	1
1	1
0	3
2	10
0	0
3	2
2	0
1	10
2	6
4	0
0	1
1	2
0	2
2	0
2	0
7	1
2	2
3	2
3	0
1	1
0	1
0	1
	0
	1
	1
	0
	1

## Sheet: Fig. 2 G
compartment diameter
Pclowt/wt	Pclogt/gt
15.164	12.485
16.667	13.005
16.897	13.005
16.933	13.437
17.249	13.583
17.258	14.164
17.445	14.455
17.647	14.761
18.088	14.815
18.088	14.981
18.198	15
18.22	15.008
18.37	15.185
18.401	15.255
18.468	15.366
18.468	15.436
18.493	15.595
18.533	15.696
18.543	15.723
18.578	15.889
18.634	16.034
18.799	16.111
18.799	16.149
18.922	16.149
18.922	16.171
19.003	16.178
19.003	16.197
19.019	16.263
19.092	16.296
19.157	16.313
19.285	16.401
19.316	16.415
19.476	16.415
19.508	16.447
19.516	16.452
19.539	16.501
19.571	16.518
19.571	16.574
19.612	16.574
19.612	16.574
19.634	16.646
19.634	16.667
19.642	16.676
19.658	16.712
19.705	16.749
19.783	16.75
19.891	16.75
19.892	16.761
19.915	16.794
19.946	16.814
20	16.891
20.031	16.933
20.039	16.96
20.066	17.101
20.069	17.101
20.097	17.159
20.192	17.222
20.2	17.231
20.218	17.249
20.223	17.258
20.223	17.356
20.268	17.435
20.291	17.436
20.291	17.443
20.344	17.445
20.428	17.455
20.563	17.56
20.586	17.564
20.609	17.579
20.609	17.596
20.623	17.656
20.627	17.704
20.645	17.717
20.668	17.724
20.675	17.752
20.742	17.778
20.742	17.782
20.754	17.89
20.876	17.89
20.883	17.901
20.92	17.951
20.92	17.993
20.946	18.061
20.946	18.088
20.946	18.091
20.951	18.139
20.977	18.139
20.989	18.198
21.001	18.262
21.004	18.295
21.031	18.325
21.098	18.333
21.118	18.34
21.14	18.34
21.14	18.409
21.155	18.493
21.213	18.501
21.228	18.578
21.228	18.634
21.249	18.651
21.293	18.663
21.344	18.741
21.358	18.776
21.459	18.873
21.481	18.889
21.494	18.897
21.574	18.922
21.588	19.019
21.596	19.132
21.602	19.153
21.602	19.189
21.61	19.231
21.617	19.261
21.617	19.263
21.638	19.273
21.638	19.349
21.667	19.381
21.667	19.405
21.674	19.405
21.683	19.486
21.695	19.493
21.709	19.494
21.709	19.556
21.731	19.612
21.731	19.63
21.78	19.642
21.785	19.658
21.816	19.685
21.843	19.724
21.843	19.727
21.865	19.728
21.865	19.765
21.865	19.783
21.893	19.911
21.922	19.945
21.978	20
21.978	20
21.978	20.014
22.002	20.031
22.024	20.031
22.034	20.045
22.083	20.069
22.083	20.14
22.118	20.148
22.118	20.15
22.201	20.157
22.213	20.218
22.222	20.223
22.229	20.227
22.239	20.275
22.239	20.276
22.239	20.397
22.284	20.411
22.285	20.445
22.312	20.451
22.312	20.468
22.333	20.488
22.347	20.615
22.378	20.627
22.395	20.635
22.419	20.635
22.423	20.645
22.436	20.701
22.447	20.742
22.447	20.757
22.471	20.873
22.494	20.873
22.494	20.879
22.529	20.964
22.56	20.964
22.654	20.964
22.654	20.964
22.662	21.001
22.668	21.032
22.679	21.051
22.679	21.082
22.696	21.098
22.723	21.114
22.756	21.118
22.778	21.177
22.783	21.177
22.798	21.237
22.841	21.27
22.858	21.36
22.858	21.36
22.859	21.366
22.879	21.369
22.879	21.421
22.884	21.474
22.886	21.475
22.906	21.533
22.935	21.668
22.935	21.695
22.947	21.785
22.963	21.785
23.011	21.786
23.02	21.787
23.02	21.789
23.061	21.81
23.061	21.814
23.061	21.816
23.061	21.845
23.086	21.855
23.086	21.86
23.086	21.86
23.107	21.881
23.121	21.905
23.127	21.922
23.168	21.927
23.168	21.944
23.237	21.946
23.248	21.999
23.287	22.002
23.287	22.083
23.287	22.083
23.333	22.083
23.337	22.098
23.34	22.098
23.366	22.173
23.366	22.216
23.419	22.216
23.424	22.216
23.439	22.222
23.463	22.224
23.498	22.239
23.541	22.286
23.541	22.319
23.541	22.333
23.544	22.419
23.544	22.422
23.544	22.459
23.56	22.471
23.56	22.48
23.577	22.507
23.583	22.529
23.588	22.531
23.588	22.567
23.63	22.593
23.636	22.596
23.659	22.668
23.659	22.674
23.659	22.702
23.659	22.714
23.659	22.741
23.704	22.756
23.732	22.783
23.732	22.783
23.732	22.785
23.753	22.819
23.757	22.819
23.757	22.839
23.757	22.841
23.757	22.859
23.757	22.879
23.757	22.884
23.757	22.898
23.757	22.93
23.757	22.998
23.757	22.998
23.757	23.046
23.757	23.047
23.757	23.052
23.779	23.061
23.779	23.097
23.795	23.109
23.795	23.14
23.808	23.141
23.808	23.168
23.809	23.199
23.83	23.199
23.83	23.204
23.83	23.207
23.83	23.215
23.83	23.218
23.83	23.237
23.879	23.26
23.879	23.337
23.888	23.337
23.888	23.337
23.905	23.34
23.911	23.366
23.915	23.366
23.915	23.393
23.934	23.414
23.952	23.463
23.952	23.477
23.952	23.498
23.952	23.498
23.952	23.519
23.952	23.519
24.05	23.519
24.12	23.519
24.12	23.521
24.12	23.56
24.12	23.588
24.12	23.64
24.122	23.685
24.122	23.73
24.122	23.795
24.122	23.795
24.128	23.809
24.137	23.812
24.146	23.879
24.203	23.88
24.242	23.891
24.242	23.905
24.242	23.905
24.242	23.952
24.242	23.952
24.242	24.028
24.242	24.055
24.242	24.055
24.242	24.055
24.242	24.055
24.242	24.12
24.264	24.122
24.264	24.137
24.272	24.224
24.272	24.242
24.272	24.242
24.272	24.244
24.272	24.245
24.272	24.256
24.338	24.272
24.338	24.272
24.338	24.272
24.338	24.285
24.338	24.285
24.338	24.285
24.338	24.285
24.339	24.339
24.35	24.339
24.35	24.339
24.35	24.339
24.393	24.368
24.393	24.391
24.409	24.391
24.409	24.46
24.444	24.46
24.456	24.481
24.457	24.481
24.457	24.487
24.457	24.487
24.457	24.564
24.457	24.567
24.47	24.599
24.487	24.607
24.523	24.607
24.545	24.607
24.567	24.647
24.567	24.647
24.599	24.652
24.599	24.652
24.599	24.652
24.599	24.66
24.599	24.682
24.599	24.722
24.599	24.753
24.607	24.766
24.607	24.773
24.607	24.782
24.607	24.811
24.623	24.815
24.623	24.819
24.623	24.835
24.623	24.84
24.623	24.905
24.623	24.914
24.623	24.924
24.623	24.976
24.646	24.989
24.647	25.021
24.647	25.081
24.647	25.081
24.671	25.094
24.7	25.094
24.7	25.094
24.752	25.094
24.811	25.12
24.811	25.133
24.811	25.163
24.819	25.172
24.827	25.196
24.835	25.198
24.835	25.198
24.835	25.276
24.835	25.276
24.845	25.328
24.845	25.328
24.905	25.337
24.905	25.341
24.905	25.356
24.905	25.356
24.905	25.392
24.905	25.392
24.905	25.392
24.905	25.405
24.905	25.405
24.905	25.405
24.905	25.459
24.924	25.546
24.924	25.566
24.951	25.579
24.969	25.585
24.988	25.585
25	25.585
25.006	25.585
25.021	25.593
25.021	25.63
25.021	25.687
25.025	25.7
25.025	25.712
25.091	25.712
25.091	25.712
25.091	25.712
25.091	25.751
25.091	25.751
25.094	25.751
25.105	25.76
25.12	25.783
25.123	25.801
25.133	25.811
25.142	25.857
25.161	25.89
25.161	25.89
25.161	25.903
25.161	25.903
25.184	25.903
25.184	25.903
25.184	25.903
25.184	25.903
25.184	25.912
25.184	25.926
25.184	25.935
25.184	25.94
25.184	25.94
25.184	25.946
25.184	25.98
25.185	26.003
25.185	26.003
25.191	26.03
25.196	26.054
25.198	26.054
25.221	26.054
25.221	26.069
25.229	26.091
25.229	26.091
25.229	26.142
25.229	26.142
25.252	26.142
25.253	26.186
25.253	26.247
25.27	26.247
25.276	26.254
25.276	26.269
25.276	26.319
25.283	26.341
25.289	26.341
25.289	26.341
25.316	26.341
25.328	26.341
25.337	26.341
25.341	26.347
25.362	26.347
25.391	26.416
25.391	26.416
25.391	26.416
25.391	26.416
25.391	26.435
25.392	26.435
25.392	26.446
25.405	26.446
25.405	26.453
25.405	26.453
25.405	26.453
25.405	26.479
25.459	26.479
25.459	26.479
25.495	26.479
25.495	26.502
25.546	26.502
25.573	26.502
25.573	26.502
25.573	26.517
25.585	26.517
25.641	26.517
25.642	26.517
25.642	26.534
25.642	26.534
25.642	26.534
25.642	26.539
25.642	26.567
25.642	26.613
25.642	26.627
25.642	26.627
25.642	26.627
25.642	26.643
25.7	26.643
25.706	26.687
25.732	26.687
25.732	26.687
25.732	26.698
25.732	26.699
25.732	26.699
25.732	26.699
25.732	26.709
25.732	26.711
25.732	26.711
25.751	26.711
25.767	26.711
25.778	26.711
25.801	26.748
25.814	26.748
25.844	26.779
25.89	26.779
25.89	26.785
25.89	26.785
25.89	26.796
25.89	26.796
25.89	26.797
25.89	26.797
25.89	26.809
25.89	26.809
25.89	26.809
25.903	26.809
25.903	26.841
25.903	26.844
25.912	26.871
25.912	26.871
25.912	26.894
25.912	26.894
25.912	26.894
25.912	26.894
25.912	26.894
25.915	26.894
25.935	26.931
25.935	26.931
25.935	26.931
25.935	26.95
25.935	26.958
25.935	26.969
25.935	26.969
25.937	26.969
25.939	27.004
25.939	27.004
25.939	27.004
25.94	27.004
25.98	27.017
25.98	27.04
25.98	27.055
25.98	27.055
25.98	27.087
25.98	27.103
25.98	27.103
25.98	27.125
25.98	27.128
25.98	27.128
25.98	27.137
25.98	27.137
25.98	27.137
25.98	27.151
26.003	27.185
26.003	27.197
26.003	27.197
26.054	27.197
26.069	27.197
26.069	27.197
26.069	27.226
26.069	27.232
26.091	27.232
26.091	27.274
26.091	27.29
26.091	27.29
26.091	27.293
26.091	27.293
26.091	27.344
26.091	27.359
26.091	27.46
26.091	27.466
26.091	27.472
26.091	27.472
26.091	27.472
26.091	27.472
26.091	27.484
26.091	27.503
26.091	27.503
26.091	27.503
26.091	27.503
26.091	27.503
26.095	27.508
26.114	27.508
26.114	27.508
26.114	27.508
26.117	27.508
26.117	27.508
26.117	27.513
26.142	27.52
26.142	27.52
26.164	27.529
26.204	27.556
26.204	27.556
26.247	27.556
26.247	27.556
26.247	27.556
26.247	27.557
26.247	27.566
26.254	27.567
26.269	27.614
26.269	27.615
26.269	27.615
26.269	27.615
26.269	27.615
26.269	27.615
26.336	27.615
26.336	27.629
26.341	27.64
26.341	27.65
26.352	27.65
26.354	27.65
26.416	27.674
26.439	27.674
26.446	27.674
26.446	27.674
26.446	27.677
26.446	27.698
26.446	27.698
26.446	27.698
26.446	27.698
26.446	27.735
26.502	27.74
26.502	27.766
26.534	27.766
26.534	27.766
26.534	27.804
26.534	27.804
26.534	27.804
26.534	27.839
26.534	27.839
26.534	27.839
26.539	27.844
26.539	27.863
26.553	27.863
26.556	27.898
26.595	27.898
26.613	27.907
26.613	27.933
26.626	27.933
26.643	27.945
26.643	27.945
26.643	27.945
26.643	27.985
26.643	27.985
26.643	28.006
26.643	28.006
26.667	28.024
26.687	28.032
26.687	28.038
26.687	28.038
26.687	28.038
26.687	28.038
26.687	28.047
26.687	28.047
26.687	28.05
26.699	28.053
26.708	28.068
26.708	28.085
26.709	28.085
26.709	28.085
26.711	28.13
26.711	28.13
26.711	28.13
26.711	28.13
26.711	28.141
26.711	28.143
26.748	28.143
26.748	28.143
26.748	28.178
26.785	28.178
26.796	28.178
26.796	28.178
26.796	28.178
26.796	28.225
26.796	28.225
26.796	28.225
26.796	28.225
26.796	28.234
26.797	28.234
26.797	28.234
26.809	28.234
26.809	28.259
26.894	28.259
26.894	28.259
26.897	28.259
26.931	28.259
26.943	28.259
26.963	28.259
26.969	28.259
26.969	28.259
26.969	28.259
26.969	28.306
26.969	28.316
26.969	28.317
26.969	28.329
26.969	28.329
26.969	28.329
26.969	28.329
26.969	28.329
26.969	28.329
26.969	28.363
26.969	28.363
26.969	28.363
26.969	28.409
26.969	28.409
26.969	28.409
26.969	28.409
26.969	28.409
26.969	28.409
26.969	28.421
26.969	28.424
26.969	28.456
26.969	28.456
26.99	28.456
26.99	28.456
26.99	28.48
26.99	28.48
26.99	28.5
26.99	28.501
26.99	28.501
27.004	28.501
27.033	28.546
27.033	28.561
27.033	28.561
27.033	28.561
27.033	28.579
27.033	28.587
27.033	28.593
27.033	28.593
27.035	28.605
27.04	28.605
27.04	28.628
27.04	28.628
27.055	28.673
27.055	28.673
27.055	28.673
27.055	28.696
27.055	28.696
27.055	28.696
27.055	28.696
27.055	28.696
27.055	28.714
27.055	28.724
27.055	28.73
27.055	28.73
27.086	28.73
27.086	28.73
27.125	28.73
27.137	28.73
27.137	28.73
27.162	28.73
27.162	28.785
27.162	28.81
27.162	28.81
27.162	28.81
27.162	28.81
27.162	28.81
27.185	28.81
27.197	28.83
27.226	28.878
27.226	28.878
27.226	28.878
27.226	28.911
27.226	28.911
27.226	28.912
27.226	28.946
27.245	28.946
27.29	28.946
27.29	28.968
27.29	28.971
27.29	28.986
27.29	28.996
27.29	29.002
27.29	29.002
27.29	29.002
27.29	29.002
27.29	29.002
27.29	29.002
27.29	29.002
27.29	29.026
27.312	29.026
27.312	29.031
27.312	29.046
27.312	29.046
27.312	29.046
27.312	29.046
27.312	29.046
27.312	29.047
27.312	29.047
27.317	29.047
27.364	29.047
27.377	29.076
27.377	29.091
27.426	29.126
27.46	29.126
27.46	29.126
27.46	29.131
27.46	29.131
27.46	29.137
27.484	29.137
27.484	29.137
27.503	29.137
27.503	29.146
27.503	29.146
27.503	29.146
27.503	29.146
27.503	29.146
27.503	29.146
27.503	29.146
27.503	29.171
27.503	29.171
27.503	29.171
27.503	29.171
27.503	29.171
27.503	29.171
27.503	29.171
27.503	29.171
27.503	29.171
27.503	29.171
27.508	29.171
27.508	29.171
27.508	29.171
27.52	29.182
27.52	29.191
27.52	29.196
27.52	29.206
27.556	29.227
27.556	29.227
27.556	29.238
27.566	29.238
27.566	29.238
27.566	29.251
27.567	29.305
27.583	29.305
27.583	29.305
27.615	29.305
27.615	29.305
27.615	29.305
27.629	29.305
27.629	29.305
27.629	29.305
27.629	29.317
27.629	29.317
27.629	29.317
27.629	29.328
27.629	29.328
27.629	29.345
27.629	29.379
27.629	29.406
27.629	29.406
27.633	29.406
27.65	29.434
27.65	29.444
27.65	29.444
27.65	29.444
27.65	29.444
27.65	29.444
27.65	29.444
27.65	29.45
27.674	29.45
27.674	29.45
27.674	29.45
27.698	29.45
27.698	29.45
27.735	29.45
27.735	29.45
27.735	29.45
27.735	29.45
27.735	29.45
27.735	29.464
27.735	29.489
27.765	29.508
27.839	29.528
27.839	29.528
27.839	29.621
27.839	29.621
27.863	29.628
27.863	29.628
27.884	29.67
27.894	29.672
27.898	29.672
27.898	29.672
27.898	29.672
27.898	29.672
27.923	29.672
27.923	29.672
27.933	29.672
27.933	29.68
27.985	29.68
27.985	29.683
27.985	29.683
27.985	29.683
27.985	29.683
27.985	29.683
27.985	29.705
28.006	29.744
28.006	29.749
28.006	29.749
28.006	29.749
28.006	29.759
28.006	29.759
28.006	29.771
28.006	29.771
28.006	29.837
28.006	29.837
28.006	29.837
28.038	29.837
28.043	29.837
28.047	29.837
28.047	29.837
28.047	29.837
28.047	29.837
28.047	29.837
28.047	29.837
28.047	29.848
28.047	29.848
28.047	29.848
28.047	29.861
28.047	29.861
28.047	29.915
28.047	29.935
28.047	29.935
28.047	29.935
28.047	29.935
28.047	29.935
28.047	29.935
28.047	29.946
28.047	29.946
28.068	29.946
28.068	29.946
28.068	29.973
28.068	29.973
28.068	29.978
28.068	29.978
28.068	29.979
28.068	29.979
28.068	29.979
28.068	30.023
28.068	30.023
28.085	30.023
28.085	30.023
28.085	30.023
28.13	30.034
28.13	30.034
28.13	30.034
28.13	30.034
28.13	30.034
28.13	30.05
28.13	30.05
28.13	30.066
28.13	30.089
28.13	30.089
28.13	30.099
28.13	30.099
28.13	30.11
28.13	30.11
28.13	30.11
28.13	30.11
28.13	30.11
28.13	30.205
28.13	30.205
28.13	30.205
28.13	30.207
28.13	30.207
28.13	30.207
28.13	30.21
28.13	30.21
28.13	30.224
28.13	30.229
28.13	30.229
28.178	30.229
28.178	30.229
28.178	30.282
28.178	30.282
28.178	30.282
28.233	30.282
28.234	30.294
28.234	30.325
28.234	30.326
28.234	30.326
28.234	30.326
28.234	30.368
28.234	30.368
28.234	30.369
28.234	30.378
28.234	30.378
28.234	30.378
28.234	30.378
28.284	30.378
28.306	30.378
28.316	30.402
28.316	30.402
28.316	30.402
28.316	30.402
28.316	30.413
28.316	30.413
28.316	30.454
28.316	30.454
28.316	30.456
28.316	30.456
28.316	30.456
28.317	30.456
28.317	30.456
28.329	30.456
28.329	30.466
28.329	30.466
28.363	30.466
28.363	30.466
28.377	30.483
28.377	30.499
28.377	30.499
28.377	30.499
28.409	30.499
28.409	30.499
28.409	30.499
28.409	30.499
28.421	30.512
28.421	30.512
28.48	30.512
28.48	30.531
28.48	30.531
28.48	30.55
28.48	30.584
28.48	30.601
28.48	30.627
28.48	30.627
28.48	30.669
28.48	30.683
28.48	30.683
28.48	30.683
28.48	30.702
28.48	30.702
28.48	30.744
28.5	30.744
28.5	30.744
28.5	30.744
28.5	30.755
28.5	30.755
28.5	30.755
28.5	30.755
28.5	30.755
28.5	30.755
28.5	30.755
28.501	30.755
28.561	30.755
28.561	30.755
28.561	30.755
28.561	30.755
28.561	30.787
28.561	30.787
28.561	30.787
28.561	30.787
28.561	30.787
28.561	30.787
28.561	30.787
28.561	30.787
28.561	30.787
28.593	30.808
28.605	30.808
28.605	30.808
28.605	30.808
28.605	30.808
28.622	30.808
28.628	30.808
28.628	30.84
28.663	30.84
28.663	30.853
28.663	30.891
28.663	30.891
28.663	30.891
28.663	30.891
28.663	30.891
28.663	30.891
28.673	30.891
28.673	30.893
28.696	30.893
28.701	30.895
28.724	30.909
28.724	30.909
28.724	30.914
28.724	30.914
28.724	30.914
28.724	30.914
28.724	30.914
28.724	30.914
28.724	30.967
28.724	30.967
28.724	30.975
28.724	30.978
28.73	30.978
28.73	30.978
28.73	31.009
28.784	31.009
28.785	31.05
28.785	31.06
28.785	31.083
28.785	31.083
28.785	31.083
28.785	31.083
28.785	31.083
28.878	31.083
28.878	31.125
28.878	31.125
28.889	31.125
28.91	31.135
28.912	31.135
28.946	31.136
28.946	31.214
28.946	31.22
28.946	31.22
28.946	31.23
28.946	31.23
28.946	31.23
28.946	31.23
28.946	31.23
28.946	31.251
28.946	31.251
28.946	31.251
28.946	31.262
28.946	31.262
28.946	31.284
28.946	31.284
28.946	31.284
28.968	31.284
28.986	31.288
28.986	31.302
28.986	31.302
28.986	31.302
28.986	31.312
29.026	31.326
29.026	31.358
29.026	31.358
29.026	31.358
29.026	31.358
29.026	31.358
29.046	31.358
29.046	31.358
29.046	31.4
29.046	31.414
29.046	31.414
29.046	31.418
29.046	31.418
29.046	31.418
29.046	31.418
29.046	31.418
29.046	31.451
29.046	31.451
29.046	31.451
29.046	31.451
29.046	31.451
29.046	31.451
29.046	31.47
29.046	31.47
29.046	31.481
29.046	31.506
29.046	31.506
29.046	31.506
29.046	31.511
29.046	31.512
29.046	31.553
29.046	31.553
29.046	31.553
29.046	31.564
29.047	31.564
29.047	31.564
29.107	31.564
29.125	31.564
29.126	31.58
29.126	31.58
29.126	31.58
29.126	31.58
29.126	31.58
29.126	31.58
29.126	31.58
29.126	31.595
29.126	31.595
29.126	31.595
29.126	31.595
29.126	31.595
29.126	31.595
29.126	31.595
29.126	31.595
29.126	31.595
29.126	31.595
29.137	31.595
29.137	31.647
29.137	31.647
29.146	31.647
29.146	31.647
29.146	31.647
29.146	31.658
29.146	31.719
29.146	31.719
29.146	31.719
29.146	31.719
29.146	31.719
29.146	31.719
29.146	31.727
29.146	31.727
29.146	31.727
29.146	31.727
29.146	31.729
29.146	31.745
29.146	31.791
29.146	31.812
29.171	31.812
29.171	31.812
29.182	31.823
29.182	31.841
29.182	31.841
29.206	31.843
29.206	31.843
29.206	31.843
29.206	31.855
29.206	31.864
29.206	31.864
29.206	31.873
29.206	31.873
29.206	31.873
29.206	31.884
29.206	31.884
29.206	31.884
29.206	31.884
29.206	31.914
29.238	31.914
29.305	31.914
29.305	31.914
29.305	31.914
29.305	31.914
29.305	31.914
29.305	31.925
29.305	31.925
29.305	31.925
29.305	31.946
29.305	31.946
29.305	31.946
29.305	32.007
29.305	32.007
29.305	32.007
29.305	32.037
29.305	32.037
29.317	32.046
29.317	32.058
29.317	32.058
29.317	32.058
29.328	32.06
29.345	32.074
29.345	32.074
29.345	32.074
29.345	32.088
29.345	32.088
29.345	32.119
29.345	32.119
29.345	32.182
29.345	32.182
29.345	32.21
29.345	32.21
29.345	32.21
29.345	32.21
29.345	32.21
29.345	32.214
29.345	32.221
29.351	32.221
29.406	32.221
29.406	32.221
29.406	32.302
29.406	32.302
29.418	32.302
29.444	32.326
29.444	32.326
29.444	32.326
29.444	32.326
29.444	32.332
29.444	32.332
29.444	32.332
29.444	32.362
29.444	32.362
29.444	32.362
29.444	32.362
29.444	32.362
29.444	32.362
29.444	32.362
29.444	32.362
29.444	32.362
29.444	32.362
29.444	32.362
29.444	32.362
29.45	32.362
29.45	32.367
29.45	32.373
29.45	32.373
29.45	32.373
29.464	32.373
29.464	32.38
29.464	32.38
29.464	32.38
29.464	32.38
29.464	32.38
29.464	32.38
29.528	32.38
29.621	32.38
29.621	32.383
29.621	32.383
29.621	32.383
29.621	32.403
29.621	32.403
29.621	32.403
29.621	32.403
29.621	32.403
29.621	32.403
29.621	32.452
29.621	32.452
29.621	32.452
29.621	32.453
29.621	32.475
29.621	32.494
29.621	32.524
29.621	32.524
29.628	32.524
29.628	32.524
29.672	32.524
29.672	32.524
29.68	32.524
29.68	32.524
29.68	32.524
29.68	32.528
29.68	32.544
29.68	32.574
29.68	32.574
29.68	32.574
29.705	32.574
29.705	32.586
29.749	32.6
29.749	32.614
29.759	32.614
29.759	32.614
29.759	32.614
29.759	32.614
29.759	32.614
29.759	32.614
29.837	32.614
29.837	32.649
29.837	32.649
29.837	32.654
29.837	32.654
29.837	32.654
29.837	32.654
29.837	32.654
29.837	32.654
29.837	32.725
29.837	32.725
29.837	32.725
29.837	32.764
29.837	32.764
29.837	32.764
29.837	32.764
29.848	32.764
29.848	32.784
29.848	32.784
29.915	32.784
29.915	32.8
29.915	32.809
29.915	32.809
29.915	32.809
29.915	32.854
29.915	32.854
29.915	32.854
29.915	32.854
29.935	32.854
29.935	32.862
29.935	32.862
29.946	32.88
29.946	32.88
29.946	32.88
29.973	32.933
29.973	32.933
29.973	32.934
29.973	32.934
29.973	32.942
29.973	32.942
29.992	32.972
29.992	33.003
29.992	33.003
29.992	33.003
29.992	33.013
30.023	33.013
30.023	33.013
30.034	33.013
30.034	33.013
30.034	33.013
30.05	33.013
30.05	33.021
30.05	33.021
30.05	33.021
30.066	33.023
30.066	33.023
30.082	33.023
30.089	33.023
30.089	33.036
30.089	33.053
30.089	33.053
30.089	33.061
30.099	33.118
30.11	33.172
30.11	33.172
30.11	33.172
30.205	33.172
30.205	33.172
30.205	33.181
30.205	33.181
30.205	33.181
30.205	33.181
30.205	33.181
30.205	33.181
30.207	33.181
30.224	33.184
30.224	33.201
30.224	33.201
30.224	33.211
30.224	33.211
30.224	33.211
30.224	33.211
30.224	33.232
30.224	33.232
30.224	33.236
30.224	33.258
30.224	33.26
30.224	33.26
30.224	33.26
30.224	33.26
30.224	33.26
30.224	33.302
30.224	33.302
30.224	33.319
30.224	33.319
30.225	33.319
30.229	33.319
30.229	33.329
30.229	33.329
30.282	33.329
30.282	33.329
30.282	33.341
30.282	33.358
30.282	33.358
30.282	33.358
30.282	33.358
30.282	33.358
30.282	33.358
30.282	33.358
30.282	33.417
30.294	33.417
30.294	33.433
30.326	33.441
30.326	33.446
30.326	33.446
30.326	33.459
30.326	33.459
30.369	33.459
30.378	33.459
30.378	33.459
30.378	33.459
30.378	33.496
30.378	33.496
30.378	33.511
30.378	33.511
30.378	33.511
30.378	33.525
30.378	33.525
30.378	33.525
30.378	33.525
30.378	33.525
30.378	33.525
30.378	33.525
30.378	33.532
30.378	33.532
30.378	33.55
30.378	33.563
30.378	33.564
30.378	33.597
30.378	33.597
30.378	33.597
30.378	33.597
30.378	33.633
30.397	33.652
30.397	33.652
30.397	33.652
30.397	33.652
30.397	33.652
30.397	33.652
30.397	33.652
30.397	33.652
30.402	33.701
30.413	33.701
30.454	33.701
30.454	33.718
30.454	33.718
30.454	33.72
30.454	33.72
30.454	33.72
30.454	33.736
30.456	33.758
30.466	33.77
30.499	33.787
30.51	33.787
30.512	33.787
30.512	33.787
30.512	33.787
30.512	33.792
30.512	33.807
30.512	33.807
30.512	33.856
30.512	33.856
30.512	33.873
30.512	33.873
30.512	33.873
30.512	33.873
30.512	33.873
30.512	33.874
30.512	33.882
30.512	33.961
30.512	33.981
30.531	33.981
30.531	33.981
30.531	33.981
30.531	33.99
30.531	33.99
30.531	33.99
30.531	33.99
30.531	33.998
30.531	33.998
30.531	34.015
30.531	34.019
30.531	34.019
30.531	34.019
30.531	34.019
30.55	34.019
30.55	34.019
30.55	34.019
30.55	34.019
30.55	34.019
30.55	34.019
30.55	34.019
30.55	34.029
30.55	34.029
30.636	34.029
30.664	34.029
30.664	34.029
30.664	34.062
30.664	34.062
30.664	34.062
30.664	34.067
30.664	34.067
30.677	34.067
30.683	34.067
30.683	34.106
30.702	34.106
30.702	34.113
30.702	34.113
30.702	34.134
30.702	34.134
30.702	34.134
30.702	34.144
30.702	34.144
30.744	34.144
30.755	34.144
30.755	34.146
30.755	34.221
30.755	34.258
30.787	34.266
30.808	34.283
30.808	34.283
30.808	34.283
30.808	34.283
30.837	34.287
30.837	34.287
30.84	34.326
30.84	34.326
30.853	34.326
30.853	34.334
30.853	34.334
30.853	34.335
30.853	34.335
30.853	34.345
30.853	34.345
30.853	34.345
30.853	34.373
30.853	34.402
30.853	34.402
30.853	34.402
30.89	34.402
30.891	34.406
30.891	34.421
30.891	34.421
30.891	34.421
30.891	34.421
30.891	34.449
30.891	34.449
30.891	34.469
30.891	34.469
30.891	34.537
30.891	34.537
30.891	34.537
30.891	34.537
30.891	34.537
30.891	34.537
30.891	34.558
30.893	34.563
30.893	34.563
30.909	34.563
30.909	34.563
30.909	34.563
30.909	34.587
30.909	34.592
30.909	34.592
30.909	34.592
30.909	34.625
30.909	34.629
30.909	34.629
30.914	34.671
30.914	34.671
30.914	34.671
30.967	34.712
30.978	34.738
30.978	34.743
31.009	34.743
31.009	34.752
31.009	34.752
31.009	34.789
31.009	34.79
31.06	34.79
31.06	34.79
31.06	34.799
31.06	34.799
31.06	34.799
31.06	34.799
31.06	34.799
31.083	34.799
31.116	34.799
31.116	34.799
31.116	34.827
31.116	34.827
31.116	34.827
31.116	34.827
31.116	34.827
31.116	34.827
31.116	34.827
31.125	34.827
31.125	34.855
31.125	34.855
31.125	34.86
31.125	34.874
31.125	34.874
31.125	34.874
31.134	34.874
31.135	34.874
31.135	34.902
31.135	34.93
31.135	34.93
31.135	34.93
31.135	34.93
31.135	34.939
31.135	34.939
31.135	34.939
31.135	34.939
31.135	34.939
31.135	34.939
31.22	34.939
31.23	34.94
31.23	34.941
31.23	35.005
31.23	35.024
31.251	35.024
31.251	35.024
31.251	35.076
31.284	35.088
31.284	35.099
31.284	35.099
31.284	35.122
31.284	35.122
31.284	35.122
31.284	35.122
31.284	35.122
31.284	35.126
31.284	35.127
31.284	35.127
31.284	35.127
31.284	35.127
31.302	35.127
31.302	35.127
31.302	35.138
31.302	35.138
31.302	35.138
31.302	35.138
31.302	35.164
31.302	35.208
31.302	35.221
31.302	35.248
31.302	35.248
31.302	35.248
31.302	35.248
31.302	35.248
31.302	35.275
31.302	35.336
31.302	35.336
31.302	35.336
31.358	35.336
31.358	35.34
31.358	35.34
31.358	35.386
31.358	35.386
31.358	35.387
31.358	35.387
31.358	35.461
31.358	35.461
31.358	35.47
31.358	35.484
31.358	35.484
31.358	35.484
31.358	35.484
31.358	35.488
31.358	35.488
31.358	35.488
31.358	35.488
31.358	35.488
31.414	35.488
31.414	35.488
31.414	35.525
31.414	35.525
31.414	35.525
31.414	35.543
31.418	35.543
31.45	35.571
31.451	35.571
31.451	35.582
31.451	35.582
31.451	35.582
31.451	35.582
31.451	35.599
31.451	35.599
31.451	35.608
31.451	35.608
31.451	35.608
31.451	35.615
31.451	35.635
31.451	35.635
31.451	35.635
31.451	35.635
31.451	35.664
31.451	35.664
31.451	35.681
31.451	35.681
31.451	35.681
31.451	35.681
31.451	35.681
31.451	35.718
31.451	35.718
31.451	35.746
31.451	35.746
31.47	35.746
31.47	35.746
31.47	35.819
31.481	35.819
31.506	35.828
31.506	35.837
31.506	35.837
31.506	35.859
31.506	35.859
31.512	35.859
31.512	35.859
31.553	35.863
31.553	35.91
31.553	35.91
31.553	35.928
31.564	35.928
31.564	35.928
31.564	35.928
31.58	35.937
31.58	35.981
31.58	35.993
31.58	36.005
31.58	36.046
31.58	36.053
31.595	36.083
31.595	36.09
31.647	36.138
31.647	36.155
31.647	36.166
31.719	36.166
31.719	36.182
31.727	36.182
31.727	36.182
31.727	36.182
31.727	36.182
31.727	36.182
31.727	36.182
31.727	36.228
31.727	36.247
31.727	36.247
31.727	36.263
31.727	36.263
31.727	36.336
31.729	36.336
31.729	36.363
31.745	36.363
31.745	36.363
31.745	36.39
31.745	36.408
31.745	36.408
31.745	36.408
31.745	36.408
31.745	36.417
31.745	36.444
31.745	36.444
31.745	36.444
31.745	36.489
31.745	36.489
31.745	36.489
31.745	36.503
31.791	36.507
31.812	36.507
31.812	36.507
31.843	36.538
31.855	36.545
31.855	36.551
31.855	36.551
31.855	36.551
31.855	36.551
31.855	36.56
31.855	36.587
31.855	36.587
31.855	36.587
31.86	36.587
31.873	36.614
31.873	36.632
31.873	36.632
31.873	36.632
31.873	36.632
31.873	36.646
31.873	36.646
31.873	36.677
31.873	36.677
31.873	36.677
31.884	36.685
31.925	36.693
31.946	36.693
31.946	36.693
31.946	36.693
31.946	36.694
31.946	36.73
31.946	36.73
31.946	36.774
31.946	36.801
31.946	36.846
31.946	36.846
31.946	36.846
31.946	36.867
31.946	36.899
32.007	36.919
32.019	36.919
32.019	36.93
32.019	36.934
32.037	36.97
32.074	36.997
32.074	37.049
32.074	37.049
32.074	37.058
32.074	37.058
32.074	37.072
32.074	37.129
32.074	37.15
32.074	37.154
32.074	37.19
32.074	37.19
32.074	37.217
32.074	37.226
32.074	37.226
32.088	37.252
32.119	37.252
32.15	37.252
32.182	37.252
32.182	37.252
32.182	37.27
32.182	37.27
32.182	37.279
32.182	37.296
32.182	37.296
32.182	37.296
32.182	37.357
32.182	37.357
32.182	37.357
32.182	37.388
32.182	37.4
32.182	37.408
32.21	37.447
32.21	37.447
32.221	37.48
32.221	37.48
32.221	37.532
32.221	37.532
32.241	37.541
32.326	37.563
32.326	37.571
32.326	37.571
32.326	37.633
32.326	37.633
32.362	37.645
32.362	37.645
32.362	37.679
32.362	37.714
32.362	37.715
32.362	37.715
32.362	37.715
32.362	37.741
32.362	37.758
32.362	37.772
32.362	37.772
32.362	37.775
32.362	37.775
32.373	37.827
32.38	37.879
32.38	37.879
32.38	37.879
32.38	37.879
32.38	37.895
32.38	37.895
32.38	37.895
32.38	37.922
32.38	37.941
32.38	37.991
32.38	38.026
32.38	38.026
32.38	38.034
32.38	38.034
32.38	38.034
32.38	38.034
32.383	38.06
32.434	38.103
32.434	38.124
32.434	38.129
32.434	38.14
32.452	38.14
32.452	38.14
32.452	38.163
32.452	38.17
32.452	38.17
32.452	38.189
32.452	38.231
32.452	38.231
32.452	38.24
32.452	38.24
32.452	38.24
32.452	38.261
32.452	38.261
32.452	38.266
32.452	38.294
32.452	38.307
32.452	38.334
32.524	38.334
32.524	38.334
32.524	38.334
32.524	38.334
32.524	38.369
32.524	38.437
32.524	38.462
32.524	38.625
32.524	38.717
32.524	38.717
32.524	38.717
32.524	38.73
32.564	38.764
32.613	38.817
32.613	38.835
32.613	38.843
32.613	38.852
32.614	38.869
32.614	38.889
32.614	38.895
32.614	38.895
32.614	38.902
32.649	38.902
32.649	38.902
32.649	38.919
32.649	38.943
32.649	38.97
32.649	38.97
32.649	38.984
32.649	38.984
32.649	39.033
32.649	39.045
32.654	39.045
[truncated: 731 more rows]
