# Supplementary material for: Critical role for Piccolo in synaptic vesicle retrieval
Source: eLife. 2019 May 10;8:e46629. doi: 10.7554/eLife.46629 (PMC6541439; doi:10.7554/eLife.46629)
Supplement: Figure 3—source data 1. [file elife-46629-fig3-data1.xlsx]

## Sheet: Fig. 3 A
norm EPSC amplitude
Pclowt/wt	Pclogt/gt
1.13963	1.90645
0.729606	0.332957
0.521621	0.264157
0.434081	0.258841
0.404527	0.199295
0.388333	0.438987
2.13552	0.546133
3.31241	0.691386
0.353212	1.89924
2.64546	0.738686
0.592112	1.00539
1.09338	0.367838
0.378116	0.751503
1.04375	0.635958
0.20191	0.171088
0.327145	0.968879
0.929677	1.32384
2.33749	0.579473
1.06718	0.587213
0.275194	0.383625
0.689633	2.27031
0.562666	0.93177
0.556279	0.595926
0.150012	0.383495
0.159228	0.544373
0.254412	0.177192
1.7089	0.904969
0.416756	0.282119
3.08344	1.08547
0.538987	0.204369
0.584565	0.0515652
2.51107	0.346254
0.397135	0.540503
2.08983	1.03936
0.986718	2.62825
	0.936186
	0.241786

## Sheet: Fig. 3 B
norm PPR
Pclowt/wt	Pclogt/gt
0.81718	0.962231
1.10607	0.690163
1.18141	0.924253
1.01823	1.17682
0.853659	0.998674
0.907284	0.855415
1.00984	0.820394
1.23178	0.941218
0.992045	1.05169
0.711624	1.15925
1.11399	1.21832
1.08101	1.08529
1.26857	1.04605
0.855537	1.02977
0.902135	1.0795
1.13457	0.982645
0.748564	1.1012
1.06651	1.24758
1.12133	0.998208
0.936678	0.868901
0.684992	1.24143
0.691659	1.07478
1.17134	0.920892
1.22751	1.19954
0.979623	1.03115
1.02781	1.1091
0.977758	1.44306
1.05556	1.22719
1.14599	1.19132
1.06538	1.27005
	1.08719
	0.902892
	0.952942
	1.15936

## Sheet: Fig. 3 C
norm release probability in %
Pclowt/wt	Pclogt/gt
3.25813	1.08043
1.23373	4.39105
0.537508	1.61293
1.01043	1.26601
1.62652	1.33105
1.38535	0.961302
0.988701	1.62508
1.01787	0.997225
0.266101	0.458292
0.991548	1.24701
1.61349	1.86333
0.00302306	1.70803
1.23446	0.486947
0.769996	1.07486
0.331426	0.74529
1.19022	1.09712
0.640321	0.609651
0.384161	0.463239
0.545572	0.315224
1.27347	1.79828
0.697974	0.986549
0.661281	0.815341
2.94806	1.24539
0.523702	0.643533
0.53189	0.180675
0.583863	1.25866
1.40831	0.727707
1.24216	0.322176
1.38819	0.472907
0.0832401	0.703686
0.715908	0.314079
0.913401	0.61801
	0.569776

## Sheet: Fig. 3 D
norm RRP
Pclowt/wt	Pclogt/gt
0.284584	1.43255
0.563014	0.0354354
0.693364	0.228378
0.623026	0.148778
0.342524	0.186355
0.298789	0.622443
1.67716	0.25087
2.75338	1.45327
0.586329	0.809106
1.39603	1.01229
0.251776	0.184704
1.34392	0.405803
0.33462	0.634398
2.23404	0.220955
0.544217	1.12182
0.418544	1.49403
0.815499	0.806086
3.31814	1.57985
1.49515	0.763246
0.182981	1.2676
0.84292	0.883736
0.614477	0.946888
0.26614	0.246394
0.408603	0.714544
0.225066	1.15302
0.543129	1.09029
2.029	0.392555
0.497942	0.0442485
2.85492	0.846219
0.886352	0.52924
1.78021	2.37566
0.894158	2.60014
	1.03304

## Sheet: Fig. 3 F
	stimilus	10 HZ train Pclowt/wt																																				10 HZ train Pclogt/gt
	1	1	1	1	1	1	1	1	1	1	1	1	1	1	1	1	1	1	1	1	1	1	1	1	1	1	1	1	1	1	1	1	1	1	1			1	1	1	1	1	1	1	1	1	1	1	1
	2	1.0048	1.20443	1.02734	1.0627	1.08342	0.842617	1.01444	1.10596	1.65437	0.966839	0.824739	1.00362	1.03465	1.23863	0.743149	1.01174	0.999924	1.10793	1.1772	1.02176	0.954567	0.934892	1.02747	0.772217	0.737801	0.93442	1.05558	0.862083	0.918775	0.998327	0.87957	0.892873	0.927608	0.815646			0.838262	0.694978	0.559581	0.782868	0.90171	0.740494	0.717957	0.778681	0.919027	1.09451	1.19547	1.25393
	3	0.809989	1.14101	1.10287	0.94462	0.785733	0.701526	0.871289	1.11583	1.27659	0.877993	0.534146	0.787422	1.01589	1.53707	0.837596	0.76615	0.995913	1.19405	0.747596	1.05173	0.87489	1.02851	0.588495	0.775842	1.01063	0.917227	1.10259	0.796261	1.034	0.983465	0.850418	1.10155	0.841457	0.772432			0.802338	0.581318	0.381765	0.657666	0.643291	0.906634	0.569939	0.742305	1.0354	1.11797	1.18976	1.24748
	4	0.66637	1.09504	1.14021	1.11493	0.858855	0.956369	0.893178	1.06249	1.12478	0.844057	0.376985	1.31609	0.995552	0.933942	0.869163	0.96168	0.967493	1.0587	0.775073	1.04461	0.828446	0.890426	0.393314	0.454221	0.67727	0.887751	1.06658	0.700842	0.89786	0.904143	0.800523	0.952885	0.800125	0.579426			0.74105	0.599401	0.541298	0.641037	0.598379	0.68246	0.580028	0.683998	0.985204	1.20908	1.08262	1.16125
	5	0.621035	0.942423	0.896399	1.05356	0.82182	0.866119	0.792641	1.03889	1.40664	0.803315	0.504974	0.841206	0.944541	1.74607	0.710161	0.675898	0.92471	1.27452	0.7036	0.91819	0.743369	0.915784	0.536775	0.625174	0.857645	0.819613	1.23108	0.666912	1.21489	0.993333	0.767221	0.798701	0.759867	0.623745			0.699878	0.574407	0.270778	0.450535	0.572859	0.612637	0.543393	0.652335	0.915964	1.08212	1.10351	1.32478
	6	0.612506	1.17382	0.899564	0.985056	0.608015	0.915338	0.699761	1.08523	1.20354	0.819091	0.457259	0.806266	0.996565	1.07982	0.903834	0.718601	0.944112	1.15803	0.716417	0.937868	0.727277	0.89111	0.593397	0.563092	0.719834	0.835162	1.23742	0.65266	1.12993	1.08078	0.698916	0.846527	0.682105	0.579667			0.742807	0.524792	0.352036	0.474154	0.719175	0.915244	0.530157	0.662977	0.910245	1.05505	1.27012	1.20603
	7	0.581782	1.01816	0.958379	1.00715	0.638013	0.826878	0.728669	1.02737	1.40112	0.760566	0.448339	0.765986	0.967502	1.22876	0.716029	0.674078	0.903587	1.28382	0.928411	1.0438	0.684793	0.801653	0.587368	0.494136	0.857703	0.814102	1.14734	0.63199	1.08694	1.2118	0.747234	1.06977	0.652926	0.614342			0.709837	0.484798	0.452576	0.373717	0.612868	0.86874	0.455835	0.495471	1.00356	1.09459	1.13242	1.27981
	8	0.63108	1.2113	1.02097	0.928526	0.550188	0.885262	0.819756	1.02051	1.73669	0.822957	0.469852	0.765688	0.965861	1.46926	0.723555	0.72912	0.891784	1.21515	0.857448	1.02077	0.618093	0.837708	0.640047	0.635157	0.656351	0.811355	1.0563	0.615151	0.947769	1.06865	0.746652	0.741649	0.715097	0.601575			0.686601	0.513123	0.342281	0.523183	0.597263	0.727063	0.462862	0.592884	0.970101	1.13065	1.10428	1.28596
	9	0.582329	1.04385	1.10898	0.924633	0.576362	0.833375	0.714633	1.0091	1.55756	0.831751	0.409198	0.898255	0.906525	1.70545	0.996701	0.772093	0.88104	1.24376	0.677281	1.07345	0.661736	0.928961	0.504772	0.450775	0.68034	0.791466	1.083	0.628426	1.06463	1.19883	0.700435	0.765605	0.69014	0.660482			0.663304	0.561455	0.48158	0.5489	0.623754	0.901292	0.409661	0.539967	0.978821	1.08541	1.13982	1.22819
	10	0.530048	1.06917	1.07955	1.10377	0.824142	0.908287	0.689588	1.01683	1.39718	0.871543	0.546678	1.2406	0.983278	1.21188	0.862056	0.667697	0.864654	1.33143	0.924253	0.986282	0.589124	0.851637	0.382484	0.467989	0.790093	0.781767	1.17266	0.584685	1.0262	1.10882	0.696978	1.00217	0.66828	0.57018			0.657663	0.566172	0.390487	0.424689	0.639872	0.748242	0.495172	0.57705	0.923882	1.03459	1.14538	1.16478
	11	0.641004	1.04655	1.04524	0.940942	0.553841	1.01779	0.663719	1.02157	1.50212	0.878416	0.478855	0.642727	0.896322	1.80745	0.860493	0.629773	0.858815	1.43535	0.830951	0.999128	0.559902	0.848053	0.788975	0.54883	0.642626	0.780459	1.01109	0.57091	1.20174	1.04358	0.710301	0.920251	0.665678	0.67464			0.627571	0.533078	0.468134	0.465994	0.58508	0.961713	0.475344	0.571773	0.978534	1.08656	1.10508	1.27336
	12	0.621032	1.05407	1.08681	0.917843	0.706593	0.998461	0.763003	0.937119	1.57437	0.952621	0.394163	1.02073	0.989246	1.76132	0.952164	0.759174	0.857898	1.40316	0.827341	1.14676	0.594291	0.768056	0.55868	0.595619	0.80266	0.784546	1.10973	0.583854	0.897184	1.08103	0.684063	0.790623	0.69109	0.652501			0.746733	0.495961	0.524627	0.53738	0.758358	0.91028	0.489116	0.557695	0.923362	1.03258	1.07348	1.22999
	13	0.559135	1.13871	1.023	1.09278	0.819474	0.994989	0.742845	1.03443	1.35484	0.890924	0.576566	1.11	0.984612	1.62376	0.887519	0.660766	0.851892	1.42724	0.645206	1.30367	0.527205	0.825309	0.584591	0.765343	0.859122	0.767464	0.927885	0.56018	0.892432	1.28618	0.719645	0.989587	0.653141	0.710288			0.685937	0.575069	0.324498	0.585341	0.712662	0.882075	0.507311	0.557503	0.936177	1.07911	1.03975	1.3621
	14	0.59334	1.11798	1.14698	0.848386	0.939345	0.997726	0.698701	0.99276	1.46896	0.90924	0.486955	1.10909	1.01907	2.05757	1.02046	0.732479	0.848582	1.39277	0.940008	1.18878	0.523084	0.83456	0.485755	0.524048	0.732357	0.734268	0.972234	0.568218	0.906411	1.13838	0.712072	1.07457	0.669534	0.635139			0.727558	0.527451	0.454349	0.592715	0.719682	0.745129	0.483588	0.606182	0.994246	1.00206	1.15566	1.20845
	15	0.562718	1.07723	1.21037	0.971729	1.06322	0.987043	0.773217	0.978666	1.82485	0.982241	0.498346	1.09441	1.03102	1.82038	1.02581	0.721081	0.834661	1.39648	0.726902	1.17273	0.453924	0.764269	0.473743	0.538251	0.731416	0.716677	0.892039	0.544663	1.03242	1.04519	0.70199	1.11982	0.67936	0.686147			0.759637	0.470191	0.343749	0.488494	0.685592	0.743086	0.588806	0.631964	1.12131	1.01775	1.14345	1.22517
	16	0.55247	1.15141	0.964385	1.00592	0.886615	1.00689	0.752183	0.943107	1.7018	0.917465	0.537112	0.882665	0.991306	1.76801	0.805214	0.68128	0.846218	1.43906	0.69617	1.36134	0.50231	0.713725	0.967171	0.725962	0.639137	0.764709	0.900031	0.542399	1.03855	1.17339	0.68969	1.02777	0.634008	0.566582			0.756713	0.537517	0.472487	0.56732	0.755066	0.713609	0.522948	0.583264	0.911245	1.09338	1.02169	1.38631
	17	0.627281	1.12084	1.08497	1.01931	0.839255	0.936604	0.700365	0.906974	1.95073	0.886226	0.580007	1.01494	1.04305	1.96476	0.91934	0.711908	0.838327	1.4125	0.848143	1.29899	0.394533	0.780896	0.599538	0.639417	0.654671	0.699421	0.752392	0.522284	1.00256	1.20177	0.723411	1.04573	0.625405	0.660185			0.71723	0.544623	0.463523	0.72967	0.668894	0.732146	0.541627	0.615189	0.80899	1.04775	1.13907	1.32242
	18	0.57236	1.12644	1.07866	1.1073	0.834407	0.949015	0.744602	0.960161	2.0438	0.925829	0.589212	1.24333	1.01254	1.50188	0.997285	0.728008	0.814932	1.35742	0.852124	1.27256	0.442518	0.638987	0.386935	0.655026	0.699711	0.717497	1.02615	0.513154	1.00557	1.13188	0.719321	1.14629	0.666631	0.773417			0.779084	0.542068	0.68316	0.809387	0.687676	0.701812	0.506186	0.576417	1.06118	1.02711	1.01943	1.16261
	19	0.59469	1.19396	1.00575	1.01826	0.857877	1.03872	0.785053	0.945512	1.96376	0.963887	0.646785	1.18917	1.04841	2.23645	1.00432	0.724314	0.799862	1.42004	0.719834	1.32835	0.448578	0.78684	0.621268	0.482292	0.77592	0.694211	0.955015	0.536193	0.99925	1.20686	0.684417	1.15979	0.555818	0.665497			0.744855	0.558289	0.560194	0.71026	0.709032	0.650276	0.481709	0.643617	1.0834	1.08241	1.03029	1.28922
	20	0.524326	1.14995	1.05556	1.08811	0.787731	1.01823	0.687557	0.894153	1.8439	0.923362	0.566036	1.34274	1.04698	1.87163	1.19261	0.678714	0.792093	1.46504	1.05135	1.38782	0.417466	0.714472	0.589581	0.665822	0.584861	0.735356	0.971032	0.495343	0.855012	1.10889	0.683945	1.25069	0.66565	0.752269			0.748899	0.517602	0.482838	0.540482	0.71497	0.632469	0.607358	0.719242	1.03976	1.10446	0.87801	1.22035
	21	0.53949	1.17793	1.09647	1.00761	0.932523	1.07525	0.765185	0.935675	1.88769	0.931399	0.605402	1.0136	1.10806	2.12026	1.16152	0.709157	0.799507	1.581	0.833806	1.32261	0.441008	0.695213	0.577975	0.722971	0.570369	0.719078	0.980144	0.498593	0.910427	1.06594	0.67916	1.26179	0.648588	0.707428			0.803607	0.493861	0.453978	0.89873	0.617121	0.765764	0.583573	0.708035	0.998492	0.928582	1.0721	1.24397
	22	0.587887	1.24171	1.06913	1.03948	0.74739	1.03172	0.790325	0.899974	1.97532	0.880725	0.593351	1.04402	1.06876	1.71863	1.07681	0.813792	0.79553	1.49488	1.09631	1.33399	0.467785	0.793291	0.572961	0.627769	0.627048	0.721325	0.848131	0.50434	0.782051	1.09416	0.678166	1.26303	0.645989	0.717011			0.737063	0.53941	0.426893	0.720854	0.688262	0.802471	0.582939	0.736163	1.02599	1.00721	1.05379	1.20104
	23	0.539945	1.17917	1.12842	1.28009	1.12733	0.977309	0.676594	0.935607	2.0861	0.952356	0.728057	1.32834	1.00269	1.99651	1.24218	0.847913	0.758892	1.46438	0.95544	1.34367	0.399065	0.679942	0.807715	0.629374	0.566055	0.713697	0.838741	0.477234	0.880975	1.05455	0.677765	1.22195	0.578765	0.676284			0.785816	0.458284	0.641177	0.491621	0.720323	0.884744	0.530194	0.708495	1.07797	1.04942	0.92022	1.34138
	24	0.541236	1.0566	1.01846	1.19817	0.941463	0.97765	0.731022	0.921546	1.8806	0.932604	0.606416	1.16252	0.978598	1.91076	1.16502	0.803641	0.79275	1.4212	0.970224	1.43887	0.423966	0.670783	0.449435	0.747139	0.686768	0.707111	0.909073	0.46802	0.751674	1.16282	0.681691	1.09931	0.565008	0.720262			0.799292	0.476543	0.472245	0.94867	0.734356	0.64532	0.619025	0.752318	0.961761	1.02433	1.06282	1.19654
	25	0.56332	1.12075	1.1799	1.11096	0.872546	1.07245	0.64865	0.87477	2.38025	0.883768	0.524631	1.14128	1.08151	2.24958	1.01817	0.96925	0.787324	1.47165	1.01237	1.33875	0.450004	0.708635	0.550152	0.790025	0.643161	0.71402	0.822316	0.481744	0.915573	1.12776	0.681826	1.26437	0.579765	0.765188			0.799716	0.447504	0.456962	0.846428	0.653513	0.561321	0.639051	0.787077	1.04146	1.00701	0.959337	1.24463
	26	0.529236	1.06215	1.12905	0.94149	0.978846	1.13114	0.725389	0.91939	1.88973	0.939716	0.652647	1.15816	1.02266	2.11944	1.29377	0.864093	0.76726	1.45401	0.976605	1.43592	0.35688	0.603164	0.813839	0.555327	0.720978	0.691684	0.807251	0.455222	0.843463	1.03228	0.658989	1.26059	0.602349	0.793428			0.844274	0.447019	0.395792	0.860048	0.623265	0.573044	0.61386	0.733667	1.0013	0.956719	0.921052	1.20822
	27	0.58584	1.21285	1.10161	1.03548	1.19513	1.03211	0.76874	0.90022	2.06616	0.924803	0.71678	1.15073	1.09087	2.10939	1.01315	0.859464	0.74546	1.44966	1.04303	1.37135	0.40847	0.735878	0.838655	0.671666	0.67397	0.717373	1.00317	0.467396	0.838095	1.24476	0.661886	1.33524	0.610951	0.727147			0.747647	0.553086	0.446546	0.59484	0.688721	0.634983	0.685634	0.855892	1.02905	0.971686	0.841644	1.15253
	28	0.496776	1.18456	1.14684	0.931269	0.818773	1.07574	0.741368	0.863984	2.04468	0.824466	0.622911	1.23959	1.03508	1.99876	1.08913	0.830438	0.735491	1.5205	0.895758	1.38759	0.382499	0.64402	0.53868	0.696527	0.592852	0.648505	0.821017	0.465667	0.999921	1.15713	0.63618	1.34507	0.563072	0.686778			0.803656	0.508716	0.577719	0.684324	0.62228	0.589951	0.622258	0.835229	0.990582	0.985096	1.0339	1.18915
	29	0.510836	1.14112	1.03234	1.19944	1.01719	1.00409	0.768774	0.874945	2.36373	0.92671	0.678445	1.18088	1.07846	2.09026	1.31599	0.894503	0.754579	1.44202	1.10977	1.50699	0.360084	0.603902	0.931478	0.489977	0.692689	0.696924	0.808566	0.46629	0.846929	1.22044	0.680531	1.24594	0.59079	0.782339			0.785313	0.530275	0.480161	0.752325	0.649774	0.610787	0.6154	0.886185	1.00079	0.968707	0.916925	1.25376
	30	0.446502	1.20708	1.05222	1.07432	0.786837	1.05654	0.692233	0.879113	2.07702	0.888772	0.624149	1.24334	1.04798	2.28132	1.40859	0.952625	0.719686	1.52856	0.888126	1.33279	0.367562	0.59958	0.881877	0.522762	0.666817	0.694774	0.751049	0.429502	0.988122	1.02934	0.673835	1.32569	0.58191	0.717451			0.817962	0.526406	0.311923	0.910133	0.645249	0.638989	0.653756	0.718758	0.928306	0.972528	0.968563	1.23577
	31	0.483832	1.31487	1.03348	1.12802	0.857301	1.0174	0.797533	0.845592	1.96837	0.892903	0.557355	1.26033	1.01913	1.81488	1.05752	0.834221	0.744187	1.4019	0.752511	1.40644	0.439263	0.658984	0.718914	0.634781	0.636097	0.702407	0.719619	0.448486	0.874905	1.16968	0.648389	1.18199	0.598192	0.73958			0.802139	0.507454	0.462975	0.804915	0.636253	0.50236	0.744736	0.837537	0.980403	0.995422	0.849065	1.07165
	32	0.530922	1.05752	1.06399	1.19482	1.16676	1.01948	0.778367	0.839808	2.01414	0.851397	0.643502	1.26194	1.0572	2.46369	1.0489	0.934632	0.744449	1.49636	0.979893	1.44886	0.38512	0.630936	0.912168	0.638644	0.65095	0.675729	0.831847	0.448994	0.890531	1.1608	0.628896	1.27794	0.526622	0.711856			0.81927	0.490447	0.562983	0.857604	0.680016	0.471207	0.578954	0.794333	1.05057	1.0544	0.889157	1.16051
	33	0.494277	1.10867	0.970218	1.10724	1.09069	1.06967	0.857956	0.887564	2.45169	0.914678	0.630573	1.55874	1.02605	2.18738	1.36735	0.977605	0.709843	1.4252	0.84359	1.5113	0.35557	0.603035	0.548311	0.814548	0.684958	0.671344	0.850953	0.433375	0.910742	1.04095	0.658624	1.27043	0.543619	0.739838			0.826696	0.471557	0.342266	0.845479	0.725385	0.536001	0.618281	0.804852	0.985367	0.971021	0.814849	1.10967
	34	0.494598	1.1262	1.04138	1.09292	0.991913	1.06945	0.746833	0.860972	2.54135	0.831463	0.608946	1.21679	1.07166	1.98157	1.22252	1.00813	0.706782	1.4632	0.73826	1.57225	0.400216	0.592045	0.6663	0.503527	0.660868	0.669099	0.759884	0.441096	0.952322	0.864469	0.649397	1.2201	0.525123	0.788566			0.78378	0.475125	0.53414	1.09183	0.553714	0.687779	0.578169	0.843541	1.17884	0.969296	0.969223	1.13668
	35	0.518706	1.26564	1.20804	1.06235	1.24265	0.978453	0.761993	0.820576	2.21198	0.916181	0.71226	1.38526	1.07346	2.24101	1.0989	0.907746	0.666967	1.33329	1.25747	1.34188	0.402094	0.550877	0.577388	0.727844	0.650704	0.662143	0.800547	0.410491	0.796345	1.08943	0.625299	1.16899	0.524808	0.741111			0.802174	0.526313	0.404579	0.865325	0.578734	0.633311	0.655769	0.83117	0.963133	0.974893	0.907611	1.42498
	36	0.537869	1.15667	1.13338	1.17232	0.978654	1.05999	0.803392	0.842223	1.89603	0.871045	0.582744	1.46709	1.05226	2.55164	1.21256	0.950201	0.719239	1.41755	0.94159	1.51403	0.318584	0.57191	1.08512	0.733668	0.772923	0.677172	0.759226	0.42149	0.886861	1.2377	0.61618	1.30931	0.534973	0.715114			0.850512	0.525423	0.586102	0.923351	0.58001	0.531651	0.59621	0.903466	1.0027	0.967331	0.818719	1.24904
	37	0.476299	1.17964	1.05423	1.31682	0.875192	0.990099	0.795648	0.888805	1.91195	0.81475	0.653667	1.09367	1.03981	2.50889	1.28432	0.789985	0.690029	1.45556	0.948033	1.38755	0.329141	0.629322	0.744841	0.59865	0.657161	0.64209	0.838143	0.419372	0.816996	1.06966	0.625225	1.26563	0.509876	0.722584			0.817306	0.473574	0.501443	0.823607	0.638223	0.488926	0.562285	0.814655	1.0457	0.898628	0.791752	1.29528
	38	0.450183	1.07413	0.958072	1.1456	0.993718	0.972912	0.733952	0.746276	2.21825	0.800125	0.601776	1.25281	1.02157	2.01363	1.2816	1.0361	0.686188	1.42574	0.907123	1.46116	0.379846	0.586345	0.733408	0.65039	0.597311	0.627546	0.764054	0.4066	0.846193	0.832937	0.621178	1.23696	0.506036	0.760011			0.826768	0.554865	0.578009	0.812948	0.646735	0.659898	0.658337	0.892735	1.03334	0.953462	0.802957	1.18348
	39	0.483226	1.12304	1.08393	1.09077	0.992933	1.00386	0.755252	0.836156	2.12006	0.881959	0.634925	1.37069	1.06509	1.90388	1.45067	0.987061	0.663768	1.50364	0.736902	1.29411	0.36288	0.516814	0.828127	0.614853	0.759561	0.660903	0.789347	0.379528	0.889887	1.00307	0.630248	1.53361	0.484323	0.735828			0.797504	0.513806	0.420798	0.787901	0.56185	0.748714	0.538709	0.872058	1.01924	0.952562	0.845627	1.10546
	40	0.517147	1.10366	1.05447	1.18672	0.966625	0.974322	0.756831	0.833269	2.52319	0.822486	0.609175	1.23791	1.02721	2.01632	1.35231	1.06672	0.685841	1.45301	0.909415	1.49637	0.263289	0.598931	0.692114	0.532091	0.630219	0.672025	0.728024	0.399709	0.739768	1.26553	0.625165	1.26607	0.539322	0.750293			0.764776	0.541117	0.414882	0.966253	0.626044	0.512113	0.5577	0.834354	0.988833	0.931654	0.90423	1.14079
	41	0.464332	1.01005	1.02289	0.971268	1.16496	0.987938	0.72531	0.830978	1.92495	0.817383	0.668537	1.19256	1.01776	2.18132	1.18183	0.939641	0.694862	1.43104	0.900125	1.49949	0.274597	0.593939	0.691909	0.657165	0.636068	0.666871	0.734374	0.407627	0.738482	1.17423	0.629375	1.19443	0.584799	0.753079			0.831188	0.530699	0.592633	0.898016	0.611738	0.549122	0.54818	0.840866	1.20296	0.974228	0.809921	1.09955
	42	0.423255	1.241	1.04121	1.17344	0.974148	1.02669	0.786723	0.799328	2.00605	0.794382	0.50893	1.41623	1.05228	1.98207	1.08967	0.967429	0.66769	1.42467	0.860372	1.46289	0.337277	0.625957	0.909137	0.808169	0.600222	0.637837	0.684469	0.384522	0.763598	0.967102	0.630958	1.37429	0.502393	0.671178			0.861194	0.508168	0.525579	0.995589	0.603536	0.660725	0.609155	0.864037	1.01928	0.870713	0.916839	1.22395
	43	0.461672	1.208	1.00005	1.27327	1.19861	1.08133	0.76945	0.785849	1.94863	0.833067	0.671056	1.25505	1.07904	2.05088	1.21326	1.03891	0.665503	1.49538	0.701324	1.49567	0.376316	0.573622	0.623561	0.62773	0.698509	0.618298	0.85826	0.395597	0.874433	1.1429	0.62721	1.26644	0.545333	0.883153			0.859552	0.457746	0.526417	0.940319	0.589471	0.634134	0.59178	0.873792	1.03679	0.906517	0.839036	1.17576
	44	0.507993	1.0102	1.08594	1.14238	0.90504	1.06519	0.749732	0.840681	2.25985	0.842324	0.747513	1.25438	1.03399	2.18795	1.29198	1.16281	0.648775	1.35713	1.00853	1.34706	0.33015	0.467137	0.839813	0.703003	0.570528	0.643301	0.709419	0.37221	0.872568	1.05775	0.614245	1.31742	0.492044	0.677611			0.816523	0.440232	0.59942	0.739453	0.547383	0.438355	0.539676	0.890547	0.997646	1.02959	0.869412	1.0841
	45	0.472386	1.12455	1.09043	1.10765	1.01402	1.04384	0.751502	0.842164	2.20787	0.766209	0.590553	1.25582	0.989309	1.7627	1.22863	1.01474	0.661194	1.39187	0.891351	1.37031	0.321689	0.515178	1.00874	0.482944	0.567285	0.639399	0.726263	0.384243	0.908891	1.06242	0.61182	1.28293	0.477467	0.749448			0.801415	0.467553	0.270504	0.848645	0.632127	0.522168	0.617985	0.885401	0.950822	0.904956	0.742979	1.04993
	46	0.473683	1.21082	0.997064	1.13356	0.966097	1.05536	0.725472	0.779279	2.00871	0.809697	0.592047	1.20314	0.986959	2.09145	1.10594	0.993049	0.679098	1.39345	0.859955	1.51585	0.28996	0.57151	0.725634	0.734757	0.722209	0.641036	0.719787	0.368083	0.837957	1.11583	0.626961	1.32968	0.47878	0.715247			0.79982	0.525868	0.517292	0.860861	0.622624	0.534738	0.515997	0.826967	0.955813	0.869838	0.891994	1.11793
	47	0.491738	1.05737	1.02194	1.17194	1.05416	0.957802	0.789157	0.784401	2.31458	0.834254	0.703666	1.19126	0.98048	2.33813	1.13078	0.996662	0.650729	1.32472	0.965549	1.44605	0.317466	0.533156	1.03296	0.67547	0.684509	0.621796	0.690118	0.386667	0.693765	1.1528	0.635552	1.43028	0.486752	0.720967			0.818122	0.473657	0.339815	0.926752	0.568391	0.436597	0.546335	0.92611	1.09153	0.89851	0.818002	1.09308
	48	0.411392	1.16818	0.992665	1.17385	1.05229	0.992942	0.714644	0.822634	1.80312	0.823662	0.713279	1.24254	1.05201	2.33832	1.44779	1.07001	0.626591	1.475	0.817249	1.44676	0.274872	0.462767	1.07046	0.780636	0.7593	0.615368	0.832065	0.353831	0.728297	1.00961	0.606716	1.41894	0.49695	0.735572			0.840416	0.52444	0.642065	0.872188	0.490133	0.476777	0.586649	0.849567	1.08533	0.943314	0.865171	1.10158
	49	0.451382	0.995782	1.00758	1.14324	0.977652	1.05481	0.766763	0.741804	1.9916	0.801662	0.706768	1.46208	1.02315	1.54688	1.06159	1.05725	0.632891	1.48275	0.851491	1.50936	0.305415	0.645941	0.695804	0.426053	0.598904	0.624915	0.762059	0.36738	0.722745	1.03197	0.598512	1.33933	0.45662	0.667677			0.783862	0.473491	0.639775	0.842055	0.571432	0.559266	0.621387	0.797134	1.07438	0.881056	0.895862	1.18752
	50	0.448444	1.09632	1.0255	1.15464	1.11224	0.884209	0.69922	0.794036	2.29798	0.751439	0.652925	1.29828	1.00969	2.40807	1.35399	0.989335	0.666368	1.45072	1.18382	1.5302	0.342218	0.55398	0.7956	0.450002	0.736526	0.588878	0.707956	0.402008	0.714943	1.06867	0.594898	1.44553	0.46322	0.799306			0.828556	0.50344	0.409786	0.820107	0.553986	0.598307	0.630581	0.854123	1.0483	0.947117	0.730542	1.09653
[truncated: 23 more columns]

## Sheet: Fig. 3 G
norm synaptophysin intensity
Pclowt/wt	Pclogt/gt
0.960279	0.838294
0.992364	1.26712
0.941387	1.08088
1.03348	0.781681
1.18266	1.12937
0.995209	1.22325
0.894627	1.08936
1.42276	1.16038
1.13441	1.08652
1.02117	0.938114
0.931803	0.664474
0.857252	0.550544
0.850578	0.697613
0.887175	0.845823
0.903707	0.747059
0.991153	0.722095
1.0043	0.721512
0.988491	0.287197
0.895353	0.764049
0.866451	0.650138
1.0352	0.755316
0.920278	0.75388
1.01721	0.603456
1.43248	0.748558
1.12435	0.654931
0.715891	0.75953
0.769245	0.861663
1.02483	0.793472
1.00803	1.19949
0.918141	0.697188
1.10964	0.607261
1.05906	0.852604
1.07385	0.969771
1.02797	0.933294
1.00925	0.72049
0.941305	0.94612
0.986696	0.604364
1.07272	0.715944
1.03127	0.75919
1.03378	0.829627
0.996273	0.840947
0.937956	0.86893
0.868841	0.891736
1.02094	0.7337
1.05391	0.562341
0.944572	0.744001
0.911198	0.682098
1.06843	0.622942
1.08267	0.71261
1.04943	0.524317
0.892303	0.704424
1.14837	0.868598
1.21518	0.66621
1.12351	0.693075
1.13696	0.724602
0.844657	0.812531
0.639025	0.756524
1.37063	0.399657
0.966139	0.588848
0.684141	0.916986
0.9525	1.2384
0.576044	0.915204
1.30907	0.904726
0.946957	1.08352
0.901601	0.78102
1.29292	1.16636
0.624996	1.15417
1.28492	1.26644
1.18736	0.951089
0.902727	0.31359
1.09936	1.06032
1.31462	0.81171
0.836652	0.841042
0.865942	1.06816
0.883419	0.872447
0.842085	0.633439
0.768776	0.645335
1.30096	0.930919
1.08818	0.7818
1.14977	1.18984
0.705153	0.62861
1.35987	1.04849
0.785215	0.989173
1.09936	0.925307
1.31462	0.739625
0.836652	0.8909
0.865942	0.834536
0.883419	0.652096
0.566077	0.569052
0.552336	0.872447
1.14302	0.633439
1.10101	0.645335
1.10317	0.930919
1.17321	0.7818
0.72257	1.18984
1.26614	0.743692
1.18974	1.15529
1.23642	1.12387
0.949727	1.07021
0.64657	0.993852
1.35001	1.0299
	1.44396
	0.933249

## Sheet: Fig. 3 I
norm FM6-64 intensity
Pclowt/wt	Pclogt/gt
1.03394	1.08796
1.02433	1.03821
0.854745	1.16556
1.03682	1.0029
1.09374	1.80146
1.03421	1.18136
0.858542	1.00032
0.928617	1.09441
1.17179	0.928592
0.963271	0.973033
0.761528	0.257308
1.08988	0.343113
0.772662	0.586134
0.826857	0.265452
1.11906	0.669688
0.94028	0.453284
1.17687	0.382618
1.30589	0.670877
1.03503	0.877007
0.884818	0.417308
1.01559	0.72173
0.974284	0.839631
1.2765	0.764399
1.03163	0.839164
0.789125	0.537841
1.4512	0.738492
1.04889	0.932684
0.88767	0.579986
0.897869	0.713912
0.936323	0.593349
1.0755	0.498339
0.959879	0.655295
1.18285	0.994401
0.776471	0.575187
0.783354	0.965209
1.1407	0.77832
1.11646	0.656189
0.843076	0.570639
1.05239	0.869755
0.656186	0.788438
0.745682	0.400025
1.07829	0.410385
1.29516	0.220757
1.07205	0.722367
	0.667839

## Sheet: Fig. 3 K FM unloading
		sec	FM1-43 intensity Pclowt/wt
		1	86.571	110.065	94.792	113.155	91	104.792	69.217	128.691	91.873	92.172	118.27	85.5	136.287	113.167	118.471	115.258	127.222	123.5	127.561	144.164	115.261	112.188	119.333	119.182	117.35	145.069	163.348	122.293	156.075	120.25	137.708	161.62	137.232	137.167	141.411	221	223.767	197.556	190.444	202	242.647	218	196.6	196	211.125	191.167	211.125
		2	68	99.21	86.229	106.866	85.152	86.156	67.652	117.33	76.618	93.99	111.703	79.962	138.963	102.167	99.471	106.032	109.028	115.321	119.421	138.507	91.652	90.562	109.917	106.159	104.6	136.897	164.311	111.683	153.415	112.667	125.236	151.54	135.179	131.667	134.815	208	222.033	187.556	201.889	189.194	236.412	198.818	189.311	175.5	200.75	176.333	219.312
		3	63.333	92.726	93.604	106.57	77.283	93.906	79.478	118.883	76.945	95.162	108.649	72.654	129.102	98.25	99.235	108.839	102.306	102.071	115.93	137.119	93.957	84.625	96.667	107.341	110.35	132.431	152.333	104.415	145.075	99.333	122.583	145.62	130.304	113.75	132.96	210.222	223.2	178.444	199.667	190.968	233.686	211.545	193.244	186.125	191.875	179	206.938
		4	68	88.79	83.542	105.141	80.739	92.885	63.826	123.17	74.982	91.727	107.473	75.487	127.148	105.333	99.941	102.323	106.722	109.607	113.474	136.537	101.652	87.812	105.083	102.386	95.75	134.897	157.591	103.22	151.189	92.25	117.528	141.84	129.036	120.167	131.323	197.333	222	181.444	184.889	196.145	236.196	200.364	195.822	191.75	205.5	179.75	204.75
		5	64.762	91.984	83.958	100.169	76.761	87.312	66.043	116.989	76.945	89.051	103.824	75.718	130.602	88.833	89	102.323	107.833	103.536	109.667	132.836	91.696	88.062	106.5	108.5	103.4	126.31	163.076	111.463	146.226	102	119.528	146.38	129.25	107.667	125.774	203.778	209.933	177.333	182.778	187.548	229.412	200.909	182.178	175.625	193.625	162.167	188.062
		6	74.19	95.919	83.208	108.289	75.587	93.875	66.913	123.606	76.145	86.263	114.838	71.974	120.861	98.583	91.647	98.806	98.833	111.179	110.719	131.687	92.435	99.875	91.75	95.386	101.95	128.586	152.25	102.805	131.698	102.667	106.069	142.64	124.107	111	124.081	192	191.033	176.667	172.667	178.194	212.176	183.909	181.311	159.375	192.25	166.083	190.25
		7	66.143	97.113	91.021	111.528	75.413	91.24	63.696	118.543	75.818	88.263	114.703	70.372	121.5	89.667	85.294	88.387	102.417	111.786	106.035	129.478	87	88.062	90.833	100.114	94.1	125.828	151.333	99.829	137.623	95.417	111.111	134.62	117.875	97.5	119.403	211.444	201.567	187	177.444	184.21	218.02	178.818	185.089	176.625	190.375	175.583	191.188
		8	65.952	91.952	88.354	104.204	82.739	87.208	74.522	115.085	77.564	85.475	107.486	78.474	117.574	79.25	89.412	93.806	102	102.321	104.211	121.194	98.522	93.25	87.417	93.614	92	120.707	145.371	102.463	134.075	109.25	111.708	134.28	114.571	97.5	119.944	205.889	197.233	172.111	166.333	183.903	215.98	194.182	181.622	160.5	185.5	170.75	185.875
		9	68.429	97.726	84.479	105.014	81.717	89.302	66.304	114.436	78.182	83.343	113.176	76.141	116.407	86.917	90.824	92.677	100.722	105.286	113.86	126.552	87.348	83.5	88.75	90.841	95.85	120.431	140.28	92.317	135.245	110.75	112.097	135.78	112.455	90.167	118.685	212.556	203.233	172.333	193.667	186.806	220.529	203.727	189.667	162.25	212.25	173.917	190.938
		10	66.095	96.823	92.604	102.528	75.196	91.812	60.043	106.074	74.109	80.242	114.392	75.141	118.13	93.833	96.118	93.387	95.361	102.786	106	129.433	100.783	80.5	100.25	94.045	96.65	122.069	148.409	90.634	132.132	96.5	110	135.94	114.562	95.917	117.75	221.889	210.767	167.222	167.667	183.774	217.784	192.455	178.022	161.625	196.25	170.583	194.188
		11	63.476	97.79	83.312	99.937	70.87	85.583	60.739	105.532	72.582	86.697	112	70.564	114.907	92.333	88.176	96.516	90.5	102.25	103.702	120.522	96.783	91.312	99.583	95.364	93.95	116.793	139.318	85.78	130.925	94.75	104.542	131.24	115.259	94.333	115.774	217.333	206.933	176.111	177	187.952	224.725	197.545	187.778	159.625	206.125	172.167	204.125
		12	65.905	89.274	81.167	106.648	82.261	89.375	60.478	111.883	73.127	86.909	101.338	71.436	117.769	92.667	84.353	88.129	94.972	102.786	104.404	122.687	97.043	86	92.833	91.364	84.6	117.69	139.114	91.268	123.264	97.75	107.417	126.38	113.161	99.167	115.516	212.333	196.333	160.111	183.111	179.613	219.196	199.727	192.089	151.75	216.5	175.25	201.688
		13	70.619	97.323	80.167	99.458	79.783	86.781	73.739	104.723	70	81.313	98.486	81.397	116.037	94.333	85.824	91.452	92.028	99.536	105.14	115.896	91	84.875	96.833	93.364	88.2	115.379	134.242	94.049	130.868	96.25	107.181	130.76	114.321	94.917	113.548	211.778	187.967	171.556	169.111	176.113	207.784	189.909	181.089	135.625	210.375	164.333	192.5
		14	62.524	91.323	89.375	94.19	79.848	86.125	64.522	106.394	72.927	80.838	106.311	73.474	111.194	95	74.235	87.581	84.528	98.429	96.649	113.507	91.174	84.688	101.75	92.841	96	112.379	134.758	87.244	118.226	90	106.417	122.38	104.884	88.167	104.129	206	176.7	173	165.889	176.065	205.02	183.364	173.689	144.5	201.5	162.5	185.812
		15	59.048	96.129	85.229	99.268	71.978	92.667	64.696	104.489	76.909	85.374	109.081	80.218	109.731	82.75	85.706	85.645	84.306	98.929	102.105	114.09	96.87	77.875	84.083	91.523	90.75	115.328	131.402	92.854	114.245	93	104.472	121.52	103.58	95.25	105.952	210.444	174.1	160.333	168.556	169.113	201.588	172	168.889	149.625	169.625	154.833	177.875
		16	65.143	90.597	86.667	100.768	67.913	89.208	62.913	106.968	65.418	88.606	103.257	71.526	110.981	87.917	79.412	81.935	89.083	91.786	98.228	111.806	89	79.25	96.917	91.727	90.2	113.241	133.742	91.366	122.208	89	98.944	116.82	108.241	85.167	109.282	194.556	171.133	152.333	154.333	168	194.275	186.636	164.889	139.875	180	154.25	176.562
		17	66.619	90.371	85.083	94.408	72.587	88.26	70.913	105.979	71.291	79.505	105.581	75.564	111.574	79.417	82.059	84.258	91	93.429	98.263	109.433	102.087	80	81.583	89.409	86.35	108.655	130.811	89.707	116.019	86.167	99.681	124.6	110.839	91.083	108.653	190.667	155.4	144	142.556	154.984	176.49	180.364	151	130.125	174.25	150.917	163.062
		18	53.286	89	76.062	95.021	75.674	86.844	56.696	106.511	70.709	75.586	96.662	76.115	111.083	85.417	80.706	82.677	90.333	97.679	95.561	104.104	98.348	73.062	80.333	88.591	90.85	110.534	128.803	85.976	128.189	87.5	106.194	119.2	109.027	94.833	110.282	196.778	155.8	145.778	139.444	156.613	183.765	175.545	156.733	126.625	168.375	143.917	179.312
		19	69.667	83.468	79.167	93.148	75.239	82.312	54.87	100.479	69.709	77.424	96.486	68.846	112.574	71.5	72.824	87.581	92.083	98.643	94.158	113.493	100.739	78.438	85.25	83.955	83	115	130.318	86.415	118.038	89.667	99.431	118.52	104.598	91.917	107.234	184.444	147.167	141.444	146.111	152.355	177.157	155.364	150.222	130.25	179.625	149.75	166.875
		20	54.476	85.548	83.396	89.937	75.543	80.573	59.435	100.17	70.345	76.97	85.959	75.538	110.222	69	88	79.613	86.389	90.821	98.895	105.194	104.304	74	92.917	91.318	94.15	108.534	130.402	85.805	116.962	95	99.431	118.82	109.339	82.333	105.976	188.333	147.267	138.333	140.667	156.016	171.843	164.364	154.622	129.625	166.625	149.583	160.688
		21	68	98.887	82.042	98.331	72.739	84.656	60.783	100.191	76.036	83.929	114.743	69.282	86.917	69.167	79.412	71.484	59.361	96.071	82.298	93.06	85.435	80.125	75.333	76.045	83.3	98.759	106.53	76.024	88.057	72.833	90.361	101.4	88.812	56.75	86.129	176.556	145.4	133.556	145.444	150.581	170.863	166.091	141.289	118.875	164.75	134.5	164.25
		22	70.667	104.645	86.292	96.303	75.5	92.188	58.435	90.745	81.455	87.576	118.338	75.667	79.917	65.417	72.882	75.548	60.222	87.286	81.86	83.284	88.913	57.438	63.25	68.341	68.9	92.845	100.992	64.659	84.208	69.667	81.083	86.18	82.464	60	82.097	175.222	147.267	140	124.778	141.79	167.451	163.727	140.378	117.875	156.25	139.75	164.438
		23	66.571	94.306	81.167	90.176	70.87	87.177	62.739	100.255	74.073	75.152	111.378	72.859	101.056	76.5	71.059	79.355	81.778	88.321	88.474	98.881	92.652	78.25	82.25	78.591	78.85	101.621	119.174	74.512	101.226	81.25	94.403	109.76	97.045	78	98.218	188	144.533	141.889	144.222	151.5	167.49	169.273	149.489	123.875	177.625	145.167	158.375
		24	62.905	86.452	75.771	95.549	80.152	86.875	58.522	99.16	69.164	74.465	106.284	70.897	100.139	80.667	75.176	77.968	75.75	83.964	90.14	103	96.261	71.375	73.25	86.25	83.7	107.103	117.076	74.463	105.113	75	89.069	104.4	97.429	75.333	97.879	195.444	142.733	140.111	126.889	149.806	166.843	171.909	149.4	128.375	157	137.25	171.438
		25	62.429	82.032	81.729	91.838	72.457	75.125	50.261	99.468	68.109	70.949	92.608	73.269	98.185	82.667	79.412	76.452	70.889	86.214	80.684	98.687	102.957	73.5	87.417	82.886	84.55	103.793	124.697	72.61	109.17	88.833	94.042	113.62	99.955	67.167	99.331	175.333	134.6	137	141	144.355	161.608	171	136.778	106.25	162.25	146.417	164.125
		26	55.286	78.145	72.146	86.43	69.065	79.948	58.304	92.234	66.036	77.768	96.73	82.282	100.083	71.833	79.588	78.032	82.722	93.321	91.596	105.015	101	86.188	87.583	84.205	81.05	107.328	116.136	73.22	102.208	88.917	97.389	113.16	101.304	84.417	100.169	171.778	131.033	122.444	127.667	142.129	162.784	161.909	140.911	118.5	152.875	148.5	151.188
		27	58.714	79.177	80.438	84.908	65.522	77.083	61.565	93.106	62.091	69.384	92.595	77.692	101.648	73.167	74.118	79.129	71.056	82.714	89.719	100.896	100.565	74.125	79.583	85.727	83.9	98.879	121.735	73.366	104.943	82.583	93.583	105.58	97.438	81.5	101.613	180	129.533	137.111	131	142.774	160.804	152.818	140.111	121.25	152.875	136	156.25
		28	61.571	74.484	78.396	90.324	63.957	72.781	54.609	98.128	63.073	71.313	97.135	74.923	98.028	77.75	71.235	78.677	72.889	86.464	85.965	95.119	101.783	67.062	88.667	82.068	86.25	98.19	115.409	64.927	107.887	75.083	88.333	102.72	99.509	87.917	100.081	163.333	124.633	119.222	125.556	140.306	151.412	156.545	137.067	113.25	149.75	125	152
		29	58.667	80.565	72.875	84.599	64.978	75.719	58.87	89.266	61.382	71.485	89.986	76.821	99.528	73.917	66.941	74.452	80.972	82.536	83.842	98.866	97.87	70.25	84.833	84.25	79.85	94.914	114.553	74.171	100.717	76.083	95.139	108.44	97.661	82.75	98.121	157.667	121.5	114.667	115.778	132.677	151.647	156.727	131.578	106.625	153	131.5	137.625
		30	55.048	75.839	69.417	84.57	70.239	76.062	55.304	94.33	67.818	69.515	92.689	68.051	96.25	77.833	63.824	66.613	73.889	88.5	81.474	100.269	101.913	69.062	81.583	83.909	86.55	92.431	110.614	77.098	96.887	87.167	98	106.34	97.973	86.917	93.637	165.889	123.8	118.222	113.556	138.694	154.588	148.545	130.644	113.625	163.875	129.25	146.125
		31	41.81	72.935	65.854	77.732	63.174	74.281	53.522	86.543	55.782	68.01	78.338	69	98.093	86.667	74.471	68.032	75.139	76.571	84.737	93.896	107.652	68.875	88.25	84.295	76.05	91.586	122.962	74.463	99.962	77.833	93.167	103.06	95.464	83.917	105.895	162	123.7	123.778	130.444	131.774	144.294	153.273	128.822	116.75	151.75	118.917	143.125
		32	51.286	71.629	68.458	77.317	69.826	77.26	54	85.468	52.636	71.091	82.581	68.846	93.213	68.167	78.882	72.258	80.5	78.679	88.737	92.761	109.174	66.875	80.25	83.545	79	98.655	113.667	73.024	100.132	75.417	95.764	106.16	98.018	80.917	96.871	164.444	121.833	125.111	122.111	136.742	148.961	150.818	129.711	108.5	136.875	124.417	138.5
		33	56.81	76.677	68.833	72.007	65.543	71.49	59.826	85.34	55.6	67.071	87.892	71.795	93.713	68.917	61.588	80.613	76.389	75.75	85.018	94.537	102.217	76.25	77.583	86.841	74.5	92.966	112.424	75.951	96.491	68.917	93.583	105	94.455	77.417	97.056	157.333	114.333	113.667	115.444	132.323	149.176	142.818	126.978	105.375	147.375	121.75	130.875
		34	50.524	75.065	65.542	73.493	64.261	69.74	55	89.106	60.436	69.687	83.284	77.295	94.38	62.75	64.471	74.097	71.972	80.821	86.544	95.791	105.913	63.062	76.583	78.136	69.05	87.224	113.121	67.927	96.038	81.917	90.792	103.9	91.375	83	96.726	160.111	117.467	118.111	107.889	131.484	140.314	142.909	121.267	99.625	144.75	118.667	130.562
		35	50.048	65.194	59.292	67.606	63.043	74.521	49.087	81.096	51.109	58.717	71.392	72.679	90.852	59	71.765	74.452	79.528	72.857	81.544	96.776	101.652	66.562	85.167	86	76.05	87.466	115.424	69.585	97.358	70.25	90.806	105.2	101.295	79.917	100.855	144	113.367	117.222	113	128.742	142.725	134.182	120.111	102.25	152.25	124.917	129.562
		36	43.524	58.048	70.229	67.099	60.065	64.906	55.696	76.383	52.109	56.394	65.676	74.038	94.917	65.25	70.647	68.968	75.472	69.643	79.053	100.478	114.217	54.938	90.417	84.114	79.65	88.207	112.03	71.146	103.264	71.833	97.944	98.1	100.062	80.583	101.048	148.778	104.733	105.333	104.778	126.032	137.118	140	115.511	99.125	129.625	120.917	138.125
		37	27.667	45.323	59.062	55.915	53.087	56.229	58.261	65.415	42.745	44.677	56.014	70.91	88.287	66.667	58.706	61.742	79.667	57.714	74.842	90.761	99.043	58.125	91.583	80.932	82.3	81.31	112.25	71.561	101.849	56.833	90.889	96.9	99.018	83.833	106.556	152.889	107.133	121.556	107.111	125.694	136.235	138	118.867	102.5	145.375	113.167	131.688
		38	37	51.694	56.896	56.958	51.457	55.146	48.87	65.766	45.073	42.343	57.514	72.372	89.185	59.583	61.882	64.71	78.75	59.607	72.175	89.015	94.87	53.75	84.5	80.182	85.75	81.172	108.795	73.317	104.642	56.667	92.153	95.16	95.321	84.583	105.242	153.778	110.333	114.111	108.444	130.113	144.039	144.364	119	97.75	131.5	118.917	135.75
		39	40.714	52.935	49.5	57.465	53.37	57.531	55.261	75.851	40.091	55.323	66.23	68.064	87.213	72.417	58.294	62.065	76.944	73.107	75.912	97.194	104.652	54.125	92.75	83.75	75.75	80.707	106.47	68.634	104.528	69.417	90.889	100.96	96.339	88.25	101.613	164.222	115.667	101	105.444	126.435	142.98	140.818	117.067	104.5	145.25	114.917	144.125
		40	38.333	53.484	59.333	55.549	58.587	60.052	49.826	73.585	41.327	45.96	57.459	78.321	92.694	74.583	59.353	62.548	80.306	61.714	80.14	95.552	100.739	55	87.167	82.636	70.45	80.31	109.894	65.878	93.981	70.917	91.819	93.94	97.429	90.583	100.202	150.889	108.4	108.444	102.111	122.403	137.824	141	115.044	97.25	138	117	135.938
		41	37.429	53.242	50.771	62.944	57.261	61.135	49.957	77.564	38.455	49.414	64.905	74.513	89.565	69	59	56.613	77.889	67.714	73.825	92.881	100.261	54	80.75	82.591	86.1	78.862	112.917	74.439	94.83	68.167	90	97.64	96.839	89.833	100.532	153.889	102.9	100.333	99	126.597	137.98	134.455	112.8	94.5	131.5	107.417	123.688
		42	37.048	51.242	52.188	61.493	49.652	56.323	52	71.117	45.109	49.556	68.243	74.077	86	63.5	70.118	64.903	71.806	60	77.088	88.164	107.522	51.188	76.667	81.886	85.7	81.897	108.652	59.585	90.83	61.917	89.431	93.44	91.009	82.667	92.073	156	111.867	109	107.111	124.871	135.784	142.455	111.222	104.875	134.625	108.5	128.25
		43	46.476	56.048	60.583	56.5	51.587	61.26	50.609	67.862	42.527	48.131	56.446	75.718	88.231	68.083	66.176	64.355	70.528	62.607	77.298	90.328	112.87	58.938	91.5	72.773	72.7	76.69	107.015	59.049	92.736	59.833	83.542	92.48	96.929	73.833	92.653	155.222	112.4	111.889	115.333	120.113	138.392	138	114.067	92.125	138.625	112.333	127.188
		44	39.333	51.452	54.104	64.894	58.761	60.115	52.913	68.33	42.782	50.495	61.946	82.013	87.602	62.5	68.471	55.516	76.222	65.357	71.491	83.373	101.348	47.812	91	77.818	81.35	80.017	98.848	67.268	85.151	64.833	86.708	91.2	93.482	83.833	96.331	155.111	114.4	122.667	109.333	125.419	136.882	142	117.844	95.75	144.5	109.083	126.375
		45	43.476	48.823	50.271	57.423	53.348	52.833	49.304	65.436	40.764	56.071	57.851	70.449	86.333	63.833	55.941	59.742	66.778	53.929	71.842	82.284	106.261	44.75	87.833	79.727	82.7	74.328	101.727	62.293	88.226	67.083	83.597	91.24	97.018	87.5	96.879	158.222	107.267	111.556	118.444	125.661	136.373	135.182	116.978	96	136.125	102.75	128
		46	37.048	49.532	53.708	54.986	52.152	56.875	45.348	68.894	35.927	45.687	57.595	77.705	84.667	69.5	54.471	59.968	71.944	56.929	73.947	81.925	106.217	51.438	78.083	71.091	74.15	79.879	103.083	67.341	94.151	66.25	85.972	89.66	95.741	82.083	93.944	150.333	108.267	102.222	100.889	121.242	135.843	132.727	113.489	95.625	115.875	109	120.375
		47	37.524	48.903	59.25	58.528	51.63	55.74	51.957	69.255	43.909	50.939	56.932	84.115	83.944	52.083	58.471	64	67.528	66.321	66.737	84.866	100.696	48.25	73.75	79.614	82.95	76.052	97.742	55.39	92.415	52.583	83.222	85.88	86.589	66.5	92.798	154.444	98.9	95	97.444	117.516	134.431	132.091	111.867	95.25	130.625	101.083	118.625
		48	43.476	54.855	51.708	53.979	59.174	52.229	46.261	62.628	36.527	46.424	56.797	75.154	81.944	64.167	60.118	59.161	68.306	54.321	65.035	86.06	94.348	49.312	81.667	80.773	80.1	74.172	100.985	59.878	89.774	70	78.056	90.86	89.125	77.75	93.282	152.111	99.6	104.333	93.556	116.532	130.902	137.364	104.222	92.25	126.5	104.25	120.688
		49	32	52.532	57.979	57.092	49.522	53.76	41.826	66.394	36.218	40.212	58.581	77.282	85.565	66.5	48.941	53.032	72.833	61.964	70.298	86.776	102.261	46.188	76.083	72.227	77.5	65.879	98.886	57.854	81.358	59.417	89.222	87.32	88.438	80.167	91.452	143.556	101.233	115.333	96.667	111.597	127.294	129.636	108.622	90.875	119.5	97.667	117.5
		50	31.762	52.339	49.312	52.62	46.217	54.396	46.043	63.989	37.364	47.657	52.689	72.218	83.519	57.583	62.353	53.29	70.972	63.5	68.456	82.657	107.174	50.125	78.75	76.386	75.4	76.414	95.409	61.341	88.962	62.417	82.444	84.34	87.732	85.083	89.468	125.667	96.3	98.444	100.889	113.468	126.039	127.091	102.956	95.75	121	105.5	116.938
		51	35.762	47.758	49.25	58.106	44.826	53.021	49.217	61.064	36.309	42.212	49.635	76.577	78.972	59	51.824	51.355	69.222	57.607	68.105	79.104	104.435	50.438	72.667	74	75.2	75.621	98.811	61.268	79.283	56.75	77.889	87.5	89.991	80.5	88.75	137.556	91.333	97.778	92.333	113.726	126.824	119.091	99.356	89.375	119.5	94.583	119.562
		52	35.19	51.758	45.833	49.38	43.457	55.396	46.435	59.287	31.4	43.96	46.595	73.744	78.139	65.583	52.941	55.806	73.278	47.25	69.719	78.269	100.783	39.312	89	79.523	78.2	68.31	98.394	56.073	85.415	52.083	86.139	86.76	86.607	79.417	92.242	117.222	92.367	100.889	93.111	111.645	120.569	109.818	98.956	83	106.5	98.917	112.688
		53	24.476	40.871	36.25	41.12	38.413	36.802	41.565	51.702	30.164	32.616	41.311	75.333	75.685	52.333	47.353	56.355	71.639	40.679	59.456	74.627	89.826	43.5	76.917	65.227	73.05	64.483	89.197	64.293	89.925	47.667	80.347	73.86	89.188	74.083	92.476	121.667	89.8	98.111	94.111	104.79	117.039	121.545	97.667	86.875	119.5	84.083	113.75
		54	23.762	38.613	41.354	42.352	46.435	35.948	37.957	52.149	30.145	34.313	42.932	68.372	73.509	48.417	49.824	47.484	67.583	46.536	64.035	78.433	92.435	40.25	71.083	64.159	69.95	59.138	88.447	55.61	81.113	41.417	84.333	74.5	88.554	76.75	89.137	118.889	87.5	93	94.778	103.323	121.098	108.636	94.778	73.375	105.875	95.667	113.688
		55	32.381	38.661	39.438	45.655	41.109	47.792	36.87	57	27.345	39.253	43.405	75.205	83.639	47.667	53.647	51.548	68	51.107	61.912	78.687	96.304	49.312	71.667	74.432	77.65	61.793	88.667	56.415	84.132	48.5	81.542	74.58	89.25	78.083	91.121	132.778	85.867	94	89.333	106.984	115.863	116.455	97.267	89.5	116.875	93.083	113.875
		56	28.095	38.919	51.708	43.261	47.109	50.115	35.478	52.383	34.8	38.212	44.459	78.974	75.611	54.083	55.706	50.935	61.667	44.036	70	76.851	95.261	45.125	78.167	73.273	73.75	64.966	87.886	57.415	80.717	44.083	73.847	85.46	85.991	78.5	88.718	129	85.867	102.333	82.444	103.323	115.275	117.818	97.778	87	106.75	94.917	103.062
		57	35.524	42.371	44.729	47.014	44.783	46.542	38.913	54.819	34.709	43.051	41.297	71.821	74.389	40.417	47.824	49.032	64.806	38.143	57.509	76.687	95.826	46.812	73.25	77.091	73.15	58.845	90.682	52.683	83.321	44.333	83.722	76.72	84.545	78.75	89.677	132.444	87.633	103.556	90.111	104.29	114.922	115.273	96.867	86	123	92	104.75
		58	21.048	39.048	45.167	46.782	43.391	42.677	34.304	53.947	27.473	35.899	39.027	72.077	76.889	44.917	54	47.645	66.083	46.25	63.895	75.224	93.391	37.938	61.083	68.477	69.95	58.897	90.811	54.22	78.755	56.083	81.653	78.86	88.562	72.75	86.766	131.444	80.6	96.556	77.111	105.387	116.529	120.455	92.444	78	100.25	94.417	100.438
		59	30.048	35.194	39.958	41.993	46.413	42.427	34.435	46.085	31.527	37.535	47.338	74.821	78	54.25	41.118	48.419	63.611	40.5	59.263	71.836	94.478	36.062	82.917	69.455	72.2	61.931	87.545	59.585	80.962	55.417	77	72.46	81.964	73.75	86.435	126	82.8	89.111	90.222	102.613	109.627	109.818	90.067	84.625	104.25	93.5	100.188
		60	26.667	42.855	39.812	42.528	44.087	40.25	44.217	50.457	24.673	37.394	47.054	72.667	72.056	47.5	48.882	50.097	61.472	39.821	59.053	76.985	95.435	34.875	59.5	69.318	75.05	60.362	89.439	53.927	78.189	46.167	76.931	73.94	86.259	78.25	81.621	112.556	78.6	95.444	82.111	97.387	113.098	108.273	86.4	81.5	105.5	85.833	101.938
		61	37.333	51.29	55.875	51.965	50.13	50.281	36.826	62.702	32.964	44.788	53.473	74.59	75.398	41	52	51.032	63.639	45.643	62.333	77.955	106.304	39.5	59.833	74.795	72.2	68.759	89.083	65.22	86.792	47.333	74.111	82.74	81.17	81.583	88.024	117.667	75.733	84.889	82.889	98.161	105.137	105.818	87.067	67.375	99.875	84.833	100.5
		62	26.286	43.484	44.792	46.641	46.522	48.26	44.652	54.021	28.473	39.596	46.014	75.244	72.537	50.917	42	52.226	62.75	42.857	62.175	78.164	95.957	39.188	66.667	79.818	78.75	66.724	89.22	53.122	80.83	50.833	80.972	77.26	79.08	78.083	84.46	116.333	77.833	85.667	76	92.419	107.902	103.455	83.378	72.75	94.25	82.25	92.25
		63	23.286	35.581	39.375	38.69	35.609	39.24	37.696	46.117	28.436	27.354	37.703	69.308	67.13	41.583	48.941	44.677	61.167	32.25	61.895	72.239	84.043	36.562	68.333	71.341	74.35	59.155	85.212	52.268	71.34	44.167	76.181	68.86	80.688	72.5	82.121	111.778	75.033	88.556	72.333	101.258	103.667	99.545	88.089	63.875	91.375	87.5	93.25
		64	19.048	27.177	32.583	35.592	29.478	31.583	35.609	38.457	20.382	26.949	27.203	58.769	60.259	40.25	36.588	42.419	56.472	26.893	49.386	58.627	86.174	29.312	62.25	62.045	57.75	40.483	74.235	46.463	71.208	35.167	64.708	51.94	74.366	73.083	80.266	99	75.433	88.222	87.556	98.274	102.667	94.273	83.889	65	92.5	77.25	90.625
		65	24.048	26.194	26.458	33.838	28.63	29.385	37.478	43.255	20.509	28.545	33.284	60.5	61.167	36.917	40.471	41.516	51.278	27.893	51.018	60.03	76.087	30.812	54.417	57.591	70.75	48.569	73.864	50.22	69.698	36.583	64.819	56.44	75.277	66.917	80.379	102.444	76.7	81.333	80.556	94.629	104.824	93.545	83.422	77	96.375	78.75	93.375
		66	19.143	29.306	31.188	29.697	32.435	32.844	30.261	39.191	24	25.313	28.77	60.5	60.12	32	46.294	34.548	51.111	27.75	52.439	57.254	79.304	25.875	55.083	61.227	70.4	51.845	75.341	51.634	64.245	33.083	71.278	56.82	73.67	66.417	82.218	100.444	72.433	88	78.111	91.661	103.157	93	81.156	80.375	100.75	80.833	96.938
		67	22.714	29.21	36.438	34.444	36.826	35.969	36.565	45.989	22.782	29.737	33.649	65	63.13	30.917	40.412	45.29	56.028	39.071	52.895	66.015	76.913	39.25	60.417	67.75	75.1	55	78.189	38.902	75.906	42.25	73.139	66.46	76.643	71.417	76.363	99.889	69.2	88.111	87.333	89.194	106.392	83.818	77.111	72.375	90.875	75.833	84.312
		68	20.762	33.548	37.875	34.535	31.826	37.708	36.696	42.085	25.145	30.879	37.811	65.744	61.935	40.25	37.706	40.097	51.417	31.393	49.684	63.821	87.957	34.5	69.5	71.159	65.85	56.155	79.841	51.122	69.962	40.583	78.069	66.86	76.786	62.083	73.194	103.444	71.067	86.444	81.778	92.371	102.059	89.091	77.511	69.125	80	76.667	90.562
		69	21.286	35.758	37.021	37.521	37.304	39.719	37.522	48.734	22.127	32.778	35.027	62.756	67.194	42.417	41.882	35.613	59.556	23.393	49.947	70.09	87	32.125	69.917	70.75	72.95	54.345	80.712	49.488	71.113	37.583	69.014	69.7	76.259	70.083	76.202	103.222	73.867	79.889	71.889	92.742	100.431	92.273	80.333	65.75	89.125	74.25	85.562
		70	30.667	39.968	44.146	43.563	34.478	39.104	42.478	54.585	33.855	32.677	43	71.205	68.148	45.917	43	47.419	57.389	44.643	56.14	65.657	92.217	32.812	67.25	74.864	63.25	59.19	82.417	59.829	73.453	41.083	74.694	75.76	74.455	75.167	72.927	107.111	67.6	78.444	72.778	85.726	96.804	89.545	73	62.625	79	79.417	84
		71	27.571	35.984	44.625	44.021	41.043	47.604	39.696	48.223	30.873	35.354	38.581	68.833	66.389	48.75	46.765	42.645	55.861	42.857	57.789	66.731	94.696	49.25	77.083	70.705	69.35	57.466	81.136	49.488	69.717	40.583	75.153	69.7	72.259	79.917	77.96	101.889	69.367	82	68.889	88.032	97.392	88.636	80.978	67.25	99.125	72.833	85.438
		72	25.81	36.452	32.583	38.324	42.609	38.979	39.783	48.734	29.073	35.697	36.095	70.051	68.778	36.25	46.882	44.871	55.861	36.821	51.772	64.373	98.391	31.812	73.667	72.909	68.85	47.914	80.083	51.829	71.472	39.917	74.194	66.74	76.027	69.667	75.242	104.333	64.067	76.111	73.778	86.581	93.961	99.091	78.422	65.625	90.375	80.667	79.75
		73	25.952	38.597	37.292	38.296	36.457	43.271	32.739	47.277	25.691	25.061	38.392	72.064	63.222	42.917	50.529	50.097	54.333	42.179	52.789	65.806	92.391	35.812	68.333	69.727	64.5	53.017	76.78	55.805	65.415	37.417	69.583	58.8	72.982	77.75	77.065	115.556	69.033	76.667	65.667	83.984	96.824	89.182	78.133	58.25	86.625	78.917	84.812
		74	15.952	27.371	29.896	35.394	32.283	33.031	32.913	40.521	22.327	24.768	33.5	65.821	55.63	45	47.882	43.516	52.333	27.179	45.035	55.522	84.043	25.812	66.583	64.682	59.45	45.517	75.356	50.707	60.509	30.083	69.333	56.72	70.036	67.25	76.685	104.111	67.4	75.444	74.333	89.629	97.373	100.909	77.556	62.25	92.125	76.75	85
		75	23.429	28.387	35.958	32.894	30.043	34.083	34.522	41.723	22.8	24.889	28.946	65.026	59.157	42.833	47.353	39.71	47.667	30.893	40.895	60.269	76.652	27.812	56.167	67.25	57.7	42.034	76.265	46.732	65.472	38.417	70.514	59.54	70.375	63	75.339	103.222	66.233	85.778	66.111	88.516	95.824	89.727	74.422	73.625	99.375	69.75	91.125
		76	20.095	35.258	40	31.972	35.326	29.479	30.739	42.968	22.2	22.758	30.608	62.526	59.435	28.833	37.294	38.387	52.667	27.536	45.982	60.343	78.478	30.062	63.25	63.25	62.05	46.069	75.144	48.561	65.925	33.75	67.431	51.72	71.527	70	76.065	96.333	62.9	79.111	70.667	86.226	96.569	91.636	79.311	69.75	91	72	88.25
		77	16.857	31.5	33.708	33.12	32.326	36.771	38.435	38.777	20.436	26.556	29.108	56.513	55.407	34.583	33.118	39.903	54.222	30.179	47.474	54.582	72.565	28.062	53.917	64.273	62.75	48.172	72.841	46.439	65.849	33.583	66.319	52.48	68.625	63.417	69.46	103.222	71.567	77.222	79.444	85.548	97.039	89.455	78.556	74	91.5	78.25	88.75
		78	22.333	33.694	33.917	34.134	29.739	34.49	28.174	35.851	20.4	24.717	35.108	66.538	55.639	30	34.471	35.968	49.972	28.607	52.737	59.269	83	25.25	58.667	67.045	58.5	49.345	79.227	47.049	64.038	36.083	69.722	57.34	68.911	64	72.403	99.111	64.633	77.778	71.222	88.484	94.255	80.818	75.622	66.125	79.5	67.5	83.938
		79	23.905	33.306	28.833	38.218	33.609	35.323	35.13	42.574	22.164	26.364	30.959	69.949	60.185	41	46.588	43.419	51.528	31.179	52.86	61.552	88.087	33	62.917	66.409	59.7	49.034	75.659	50.293	72.358	44	66.792	60.7	72.562	68.917	72.911	107.778	65.133	71.889	63.889	84.339	97.353	90.455	76.2	76.625	88.625	69.083	89.312
		80	30.952	35.871	38.333	38.641	43.717	41.875	36.304	44.372	25.091	25.273	39.541	75.692	61.093	39	37.882	42.484	51.111	31.036	50.404	60.91	83.565	25.188	52	70.568	71.75	49.31	73.129	50.439	62.189	38.25	64.708	58.62	65.929	72.083	69.685	96.556	64.367	80.111	77.444	88.742	98.039	96.909	80.711	67.625	85.875	72.25	84.625
		81	22.81	35.032	31.458	38.493	32.022	42.125	38.478	44.809	26.782	33.455	34.581	65.077	57.361	33.167	41.353	41.387	46.083	37.821	48.333	58.478	91.087	38.5	73.417	71.045	69.25	49.345	73.394	44.707	66.925	38.917	65.375	60.54	70.625	73.333	69.927	110.111	66.5	78.333	81.667	83.21	100.412	96.545	79.978	61.625	79.875	75.417	91
		82	29	39.226	36.333	36.57	37.87	40.521	40.435	45.766	30.273	27.657	35.284	66.782	61.694	40.5	41.529	35.065	60.083	29.929	52.947	61.209	85	34.375	65.5	72.75	64.55	50.966	72.424	45.659	60.849	41.167	64.917	65.6	72.295	62.333	74.492	107.889	65.767	76	76.111	84.548	99.471	89.091	76.133	58.125	93.875	77.583	86.875
		83	22.857	36.339	38.104	33.993	36.565	37.99	31.87	44.053	24.982	29.475	36.23	71.038	59.546	33	35.235	39.161	51.444	35.964	48.877	62.299	89.783	30.562	62.25	66.75	63.8	49.155	75.697	47.585	63.302	38.583	67.278	58.26	73.679	59.667	67.411	106.444	65.733	74.667	67.778	83.581	96.314	89	70.644	65.375	89.25	75.5	89.75
		84	24.762	29.403	32.25	33.451	32.065	39.156	39.391	41.904	21.655	25.222	31.878	65.885	55.287	33.75	35.941	36.097	52.806	30.214	44.07	60.388	74.043	31.5	62.583	62.136	65.55	42.879	72.189	50.634	60.151	31.833	63.236	55.04	69.562	65.417	70.944	94.778	64.8	69.111	71	81.903	97.51	88.364	72.067	69.125	90.875	70.167	86.562
		85	24.238	27.323	27.917	31.099	29.5	39.615	37.304	37.904	24.327	27.253	30.297	66.808	55.398	37.333	39.824	37.548	44.889	27.25	48.93	52.537	75.652	25.438	68.167	62.932	55.8	46.879	70.848	38.146	62.34	32.417	65.181	53.2	70.277	64.667	69.911	103.444	67.8	70.444	68.444	86.177	94.569	84.909	75.267	66.625	92.625	73.583	92.125
		86	22.619	29.355	31.208	34.915	29.891	35.26	37.826	36.702	22.782	27.727	29.135	71.731	53.917	29.083	39	37.742	47.639	24.036	47.404	48.881	77.652	28.25	59.5	59.932	63.65	45.621	66.106	46.951	67.113	29.083	68.222	49.9	65.902	65.75	70.815	95.556	59.4	72.111	66.556	83.839	91.824	80.818	74.956	59.75	78.875	70.25	79.875
		87	25.095	26.968	24.896	30.676	32.391	34.115	34.826	40.351	22.691	24.263	35.473	74.154	55.204	28.833	34.059	39.129	54.278	30.964	45.211	60.03	88.261	22.938	47.583	67.432	61.35	43.034	70.258	41.439	58.245	31.833	64.5	60.02	64.009	63.083	66.597	83.556	60.367	71.667	60.333	81.032	90.902	87.182	80.311	67.625	84.125	68.167	80.938
		88	20.143	29.048	29.417	30.873	31.174	33.073	30.522	39.926	24.218	21.788	33.716	63.269	51.583	29.583	39.647	36	44.528	26.679	50.877	59.955	81.043	24.25	50.917	58.295	61.5	39.207	67.583	44.268	65.792	40.333	61.431	51.66	63.857	49.333	68.137	101.333	59.167	78.778	64.111	84.968	93.706	94.545	73.689	57.5	79.25	66.667	87.25
		89	16.667	27.984	36.479	28.634	27.696	30.771	28.696	37.16	19.382	20.576	28.365	61.372	52.269	24.333	32.118	32.226	48.056	26	43.93	54.567	76.652	30.5	52.333	59.409	58	40.983	65.114	40.854	64	39.083	66.417	59.76	63.214	53.417	64.185	86.667	62.367	79.444	65.889	81.871	87.588	86.727	76.311	66.375	78.25	69.25	79.188
		90	15.476	28.371	31.25	27.57	32.717	32.573	31.087	38.053	21.218	28.606	26.716	66.923	51.574	37.25	29.824	31.484	45.944	27.393	51.053	51.701	83.217	32	56.167	54.727	60.05	46.948	64.205	43.634	60.66	35.583	64.986	53.6	62.348	60.917	66.565	95.889	53	71.111	73.333	80.565	88.431	89.818	73.444	53.75	82.25	60.75	83.062
		91	22.952	29.371	36.5	29.613	27.63	28.625	32.826	35.532	17.6	22.949	29.905	60.91	48.111	36.167	23.353	31.129	44.222	25	44.193	54	70.609	23.438	60.167	59.795	54.75	39.086	61.644	40.659	56.226	32.583	66.778	53.06	65.723	60.917	69.46	99.333	58.2	70.222	60.778	78.71	89.843	84.636	74	61.375	82.25	72.083	77.125
		92	18.81	29.081	29.812	28.415	31.022	28.823	32.913	38.16	17.255	24.566	29	60.987	50.046	28.833	35.412	30.806	43.306	26.179	44.807	51.09	73.522	27.125	53.917	57.455	63.65	41.517	68.386	41.902	60.396	36.833	64.542	51.8	64.893	54.667	63.403	98.111	57.033	78	64.556	80.742	93	84.545	72.022	60	76	76.75	78.75
		93	18.381	22.613	31.792	28.183	36.348	33.552	35.957	36.277	16.491	23.475	29.108	60.449	46.111	29.083	27.118	33.548	42.944	28.786	41.895	49.343	74.391	23.438	51.917	63.068	56.35	40.483	69.053	40.39	56.321	32.917	57.056	48.6	61.268	52.583	66.387	95.111	61.667	70	59.889	79.161	90.098	90.364	75.489	67.5	82	69.833	85.688
		94	22.095	26.242	31.562	33.141	34.804	29.719	30.739	35.532	16.909	24.758	30.486	63.526	51.296	27.5	33.765	30.129	46.833	32.286	38	50.075	77.043	22.875	53.75	58.545	54.6	45.138	62.583	38.171	56.415	28.583	64.208	53.06	60.616	65.167	64.96	96.667	59.6	78.333	72.444	76.71	93.784	84.818	78.356	52.875	77.125	66.75	83.688
		95	22.19	27.871	30.104	28.852	24.935	33.177	30.261	37.16	21.818	23.404	27.662	65.333	50.491	18.417	30.588	28.71	50.278	25.321	45.298	45.418	81.435	22.375	53.583	59.886	45.6	46.138	66.553	47.805	55	33.167	58.306	49.7	61.571	57.25	57.379	96.889	63.7	78.556	67.556	75.71	88.608	89.545	75.689	61.375	84.25	66.75	81.812
		96	18.19	30.016	25.75	27.782	27.565	33.5	27.696	32.33	17.891	22.414	32.405	66.782	53.074	32.833	33.353	28.968	41.583	27.464	41.632	47.209	76.391	23.688	55.5	61.159	57.95	36.19	62.265	42.439	57.057	34.667	55.972	48.28	60.384	63.5	62.347	50.444	39.8	47.111	41.444	59.258	61.569	49.091	53.689	34.25	47.625	39	47.312
		97	21.762	29.016	33.958	33.676	31.761	29.979	36.565	36.617	19.491	27.636	28.23	59.308	48.176	18.583	22.765	32.194	45.194	27.036	40.912	53.806	75.783	21.812	59.917	62.227	50.3	44.845	65.894	47.634	56.849	34.333	61.292	53.72	59.402	57	62.669	44	35.767	55.778	40.778	59.645	63.569	52.273	51.733	43.625	35.75	49.25	48.688
		98	15.619	25.032	32.625	28.183	29.783	34.677	37	39.723	23	23.889	33.486	65.872	49.722	20.417	27.176	34.129	46.472	19.75	41.544	50.836	72.652	22.812	43	65.727	58.15	42.759	64.606	45.049	54.226	31.5	52.722	50	62.768	56.667	61.782	85.111	52.433	70.111	67.333	73.548	87.647	77.364	74.511	58.375	72.625	62.167	66.375
		99	17.952	26.855	24.812	29.056	31.717	33.948	28.609	39.638	24.636	22.434	30.068	65.115	49.648	27.25	28.882	27.419	43.333	25.429	40.579	42.731	70.217	22.125	50.417	65.409	56.4	42.069	67.652	37.805	55.943	35.583	62.375	48.74	58.804	53.417	65.677	82.889	52.8	67.778	57.667	72	81.529	70.182	63.689	48.875	76.875	63.167	65.188
		100	13.143	23.032	26.833	30.394	25.957	31.177	31.304	37.16	20.582	19.96	29	60.91	51.657	34.417	33.706	27.097	48.306	25.714	42.158	48.403	63.957	21.938	50.667	59.591	62.9	42.397	60.864	44.512	56.358	31.583	57.264	55.26	61.759	54	65.597	73.889	47.533	67.889	64.222	69.581	80.255	65.545	62.511	47.375	66	59.417	67.938
		101	14.81	23.71	25.062	29.662	31.87	27.062	34.522	32.84	18.164	20.03	26.446	71.731	55.778	17.5	24	26.29	43.917	21.429	35.386	42.806	67.652	22.188	55.083	55.909	56.05	41.328	64.379	42	53.792	38.333	62.097	46.46	60.473	48	61.194	72.667	52.533	57	49.889	67.758	75.961	63.182	61.022	48.875	67.875	55.333	62.375
		102	17.905	25.677	31.646	26.887	25.717	32.573	30.696	37.989	20.527	20.192	22.757	63.218	54.111	32.75	31.647	30.258	41.528	21.714	36.614	49.119	65.565	22.938	36.25	64.159	49.05	41.845	61.939	41.366	55.566	35	58.403	46.86	59.973	58.833	59.355	50	39.3	46.556	43.667	58.613	61.667	50.182	52.622	43.375	49.5	47.583	53.562
		103	15.81	24.71	26.167	28.063	25.717	28.667	29.087	31.787	21.182	21.253	27.311	61.91	49.454	22.75	29.706	27.355	44.806	17.357	42.14	47.582	69.13	18.875	43	66.75	46.4	34.672	58.386	41.098	52.245	36.417	54.792	42.66	58.42	53.667	60.258	63.333	40.7	50.667	38.111	57.016	59.882	55.364	51.489	38.75	50	42.833	52.188
		104	24.905	23.935	29.229	23.676	26.522	29.198	31.217	30.181	15.327	17.596	26.649	59.538	46.102	24.667	28.471	24.548	39.333	30.321	39.93	49.627	75.304	22.438	50.833	57.864	58.4	38.034	59.03	38.366	55	41.833	56.097	51.72	58.688	56.667	63.702	68.889	46.167	57.111	58.667	63.887	74.51	60.091	60.111	46.25	55.125	54.333	66.375
		105	18.619	26.306	29.229	25.028	24.196	24.083	32.826	33.83	15.945	24.566	22.743	60.987	46.833	24.083	28.471	26.161	43.944	21.321	38.123	45	64.435	26.625	44.75	59.568	55.2	37.966	55.917	33.171	46.962	33.583	56.736	41.44	57.125	58.5	60.516	64.444	44.133	55.556	51.444	63.032	70.784	61.909	55.022	50.125	61.25	53.25	60.812
		106	18	21.903	28.333	25.718	24.804	27.01	25.348	30.606	17.473	17.111	26.689	64.179	42.676	21.833	20.647	26.548	39.806	26.821	38.789	47	65.522	19.188	46	61.841	58.8	35.655	55.826	36.268	51.358	35.667	53.139	42.44	57.732	48.167	56.774	70.778	47.333	58.444	54	66.419	68.667	60.273	55.511	43.875	60.25	55.417	56.812
		107	9.857	21.387	24.958	24.761	21.022	25.99	32.087	29.745	18.618	21.253	22.203	59.423	43.889	17.5	26.118	22.71	39.556	21.643	38.123	43.582	69.565	23	37	56.591	47.05	29.621	56.515	35.585	49.019	28.167	51.278	38.8	54.196	61.083	59.065	71.556	41.3	49.667	48.667	62.097	71.196	55.182	53	48.5	61.125	52.333	58.5
		108	19.857	23.935	25.812	27.775	21.543	30.24	28.522	28.053	21.073	21.788	27.878	66.167	50.5	29	20.529	17.065	33.444	20.143	36.842	47.149	71.261	21.75	40.667	63.455	46.4	31.621	58.417	42.122	43.623	33.083	51	44.44	59.482	48.75	55.218	61	39.533	53.667	47.889	60.661	66.51	59.909	56.022	46.5	56.25	53.417	60.562
		109	20.286	24.903	29.729	22.866	26.391	26.708	34.565	31.574	21.636	21.545	22.959	55.385	45.722	26.167	24.118	24.258	46.528	23.643	37.842	46.925	72.304	21.125	42.833	66.318	48.1	38.552	56.561	42.463	46.736	33.417	58.431	40.42	57.696	55.25	56.04	61.889	37.067	61.333	50	62.79	72.804	57.909	53.067	41.75	52.75	49.75	64.062
		110	29.714	22.79	24.979	26.972	25.87	24.646	28.565	32.5	16.564	23.152	19.689	63.244	43.898	24.583	22.765	23.871	41.556	24.464	34.772	42.627	67	19.188	38.25	60.75	51	38.448	57.841	33.659	47.094	31.667	53.583	46.66	55.741	65	56.056	69.889	39.667	54.667	49.889	63.161	68.961	62.364	55.467	42	48.875	57	65.562
		111	15.571	25.5	29.396	24.754	24.391	27.667	33.87	31.851	19.709	19.788	25.797	60.628	38.769	28.667	23.882	29.774	34.417	22.179	34.719	43	70.652	21.875	46.583	61.318	42.4	35.034	57.598	40.878	44.189	32.917	51.083	42.9	55.393	49.417	54.419	76.222	44.867	54.333	48.111	61.065	72.451	61.273	56.089	51.25	51.625	48.25	60.75
		112	12.857	23.742	25.021	25.514	24.326	25.875	23.435	31.968	23.709	19.455	26.635	64.769	46.769	32.167	29.294	19.839	36.25	22.964	30.368	42.537	64.391	26.75	48.167	58.886	52.55	34.897	59.795	38.805	42.717	29.25	55.819	45.06	54.812	48.75	55.653	66.444	40.8	58.556	42.556	60.387	68.784	57.727	53.467	44.125	58.625	50.917	55.312
		113	13.619	21.081	28.083	24.268	20.435	22.51	27.783	29.511	14.436	18.182	19.581	56.308	43.87	27.333	25.118	22.097	34.389	21.893	31.368	46.791	73.522	16.5	39.75	57.523	47.35	32.086	58.962	40.049	44.264	31.917	44.667	37.72	53.661	55.083	56.831	68	37.4	51.667	45.778	61.016	65.333	48.636	52.289	47.375	44.75	59	59.688
		114	17.048	20.71	22.708	25.077	20.891	28.146	31.478	31.968	17.4	20.162	28.824	56.782	40.435	18.75	28.294	20.323	41.639	19.679	39.193	46.194	70.739	22.312	43.583	49.909	45.15	31.586	54.644	34.902	40.283	41.25	50.681	39.24	57.982	56.5	58.669	63.889	38.9	52	50	58.048	64.471	55.182	55.444	35.375	53	52.75	53.5
		115	18.095	20.984	21.438	21.641	23.826	26.75	31.478	31.883	16.873	16.97	28.392	62.167	41.343	22.667	21.353	23.677	39.778	21.821	40.105	41.313	56.13	17.812	38.833	60.409	57.9	33.431	56.455	37.195	46.528	48.083	49.903	41.98	58.83	52.583	53.718	60.778	42.233	53.111	44.333	59.435	68.51	60.818	53.267	45.875	51.625	43.833	53.188
		116	18.619	21.952	25.792	24.93	20.261	26.604	29.391	29.351	15.018	21.313	24.784	60.936	38.972	31.167	23.059	22.806	35.75	26.357	34.368	42.448	66.087	19.5	43.417	57.432	53.9	33.672	54.833	34.78	46.679	40.667	54.069	40.32	57.723	49.917	51.161	55.444	42.767	53.333	46.778	56.065	68.804	57.455	52.667	49.625	50	52.833	52.562
																																						63.333	37.867	55.111	38	59.242	60.961	63.091	55.067	47	55	52.083	55.188
																																						56.667	37.333	51.222	50	55.855	65.216	52.455	53.156	41.875	52.5	47	50.688
																																						50.667	37.7	49.333	47.889	56.661	64.176	46.182	51.889	32.625	52.75	55	53.938
																																						60.556	37.6	51.556	29.111	56.581	58.961	48.636	55.044	42.75	53.75	47.333	55.312
[truncated: 353 more columns]

## Sheet: Fig. 3 K % FM released
% FM1-43 released after 90 s
Pclowt/wt	Pclogt/gt
72.5991	61.8646
83.1968	63.3955
73.9031	60.2916
84.7141	59.5787
71.9896	46.7231
75.7009	44.2781
77.6899	65.6576
72.002	49.723
78.1888	48.9686
74.5411	56.56
75.24	51.0916
73.8013	65.9474
72.8321	53.0166
83.4815	56.0058
79.6154	63.4477
82.303	47.5927
79.3545	54.9508
78.3966	46.6915
77.5047	69.0842
76.3398	58.0638
80.904	50.2323
75.3292	57.4529
72.9371	59.7475
72.4895	49.5594
78.8633	63.2306
72.7691	48.2906
83.9961	52.8789
82.7147	34.7929
69.3167	47.7898
71.321	23.3573
75.8034	43.3095
75.1913	42.3216
76.733	25.7358
81.7759	55.4589
81.4434	59.2077
81.1607	47.2159
79.0501	68.7141
70.5659	50.1337
75.7798	28.1855
80.7971	30.4065
85.3159	8.14648
68.0212	37.5351
83.8166	50.086
79.956	82.1935
74.5461	33.4349
71.5417	39.1547
72.2617	32.2613
66.0118	30.357
64.5753	57.4278
80.7078	57.0739
85.4774	44.4924
70.6812	53.7603
79.9285	35.7548
81.8268	26.5921
82.8947	90.5462
72.8034	30.2656
70.6426	55.1072
73.4576	87.1529
85.0875	79.4787
81.4099	58.9481
74.1564	79.2259
86.8933	53.2347
84.2589	64.9411
86.8579	37.2443
68.4863	58.5257
89.7847	65.895
83.3065	58.3717
70.9312	27.8803
70.8472	40.0766
78.2876	43.7967
71.3277	71.7205
66.5592	68.462
66.8542	63.1923
79.7906	59.7538
87.3128	59.1069
82.4473	59.7188
79.5754	9.4319
75.1926	57.0538
85.9514	88.7683
72.0957	63.8519
82.2675	63.7498
77.497	76.9471
56.5054	90.6199
75.7704	67.8596
82.4747	72.2895
84.3753	62.7231
71.8351	57.5174
77.346	79.4253
58.3076	77.3753
68.5258	62.4774
75.7154	45.6076
74.0207	6.9313
65.9391	19.5044
72.6352	19.3864
67.3398	20.9025
81.7576	40.2418
73.5132	49.1359
75.4818	28.1621
72.0307	31.3217
82.3969	35.4609
75.3463	37.9543
75.6812	39.5598
60.2516	35.1979
69.6756	30.1255
74.5793	35.8188
66.4347	29.4853
70.1654	30.1925
81.5456	32.7625
76.0879	51.7606
71.8807	35.5359
82.5724	31.3786
77.2919	20.2639
88.3543	38.9038
71.4084	29.7972
81.7263	36.6486
86.8828	19.4274
58.5764	62.7957
67.8398	55.5372
55.7767	27.3426
68.1231	44.642
46.394	35.3563
69.6559	52.6427
49.6593	48.3028
47.7542	29.5162
80.2827	23.5818
63.2619	31.5784
81.958	20.9543
82.0932	56.4433
66.4287	23.1702
81.1492	32.8549
78.0891	28.3407
68.037	24.5779
78.9903	34.8825
73.3173	52.899
83.2935	23.0384
78.2989	23.2709
93.4418	23.9127
67.7655	27.9228
72.6317	21.2757
78.612	28.1348
87.7132	35.605
79.5031	27.2895
88.083	53.3618
45.5839	27.2595
52.0334	20.6928
61.0973	29.8938
75.1274	29.7203
74.9485	39.4157
73.5591	19.3079
73.2828	24.3585
63.1512	63.7857
70.8505	56.086
73.1442	18.3183
81.0966	22.683
72.9726	23.8322
81.6924
67.6594
65.9178
77.7898
72.2793
72.3537
64.953
54.8006
53.3364
85.1369
55.2278
51.2281
88.009
94.9968
95.1523
53.2417
30.9645
54.0073
73.0879
70.8358
78.8036
90.9298
86.1709
82.6357
83.0609
85.2427
72.3209
82.5958
93.7345
81.2102
89.1913
75.016
85.2714
72.5285
73.645
76.4016
81.6303
77.8
76.794
81.0721
82.2749
74.2878
82.0755
80.9618
90.2664
83.0006
71.9618
82.6972
87.4194
89.5173
80.7339
89.6136
80.7693
90.0786
78.4928
80.0554
72.791
77.9683
77.7352
74.6126
57.5379
77.1927
83.6535
76.8769
79.0446
28.7298
71.4045
72.4593
80.5362
80.2131
71.8995
78.6583
73.0576
70.5558
42.6632
82.6185
63.6169
51.8115
54.069
76.789
66.4318
71.5601
70.0919
66.1813
60.7365
75.0526
57.9377
63.6086
63.8211
