# Supplementary material for: Critical role for Piccolo in synaptic vesicle retrieval
Source: eLife. 2019 May 10;8:e46629. doi: 10.7554/eLife.46629 (PMC6541439; doi:10.7554/eLife.46629)
Supplement: Figure 4—source data 1. [file elife-46629-fig4-data1.xlsx]

## Sheet: Fig. 4 C
Rab5 vesicles/ length of axon				Rab7 vesicles/ length of axon				EEA1 vesicles/ length of axon
Pclowt/wt	Pclogt/gt			Pclowt/wt	Pclogt/gt			Pclowt/wt	Pclogt/gt
0	0.124896			0.141689	0			0.132185	0.145258
0.0254362	0.0702658			0.100944	0			0.103093	0.0815577
0.0264068	0.056815			0.167555	0			0.103752	0.0362004
0	0.137204			0.0565667	0			0.113132	0.0454669
0	0.0409182			0.0774749	0			0.123071	0.0919794
0	0.0664341			0.0409048	0.0746536			0.118227	0.0911577
0.0545762	0.156031			0.0255174	0.083257			0.128504	0.119909
0.111439	0.112083			0.0928781	0.0937998			0.183458	0.0294898
0	0.0573416			0.101864	0.101852			0.12585	0.0625378
0.0178916	0			0.138291	0.0538561			0.0694798	0.320777
0.164978	0.0533291			0.112848	0			0.100499	0.10648
0.084877	0.0627536			0	0			0.169482	0.141223
0.141614	0.115732			0.0863682	0			0.0872848	0.0720487
0.0457718	0.053183			0.103595	0.166431			0.0811507	0.105141
0.084832	0.028811			0.0179572	0.0538953			0.127547	0.0423846
0.084832	0.0217817			0.0844416	0.0943708			0.205423	0.078064
0.0779059	0.0279374			0.0806473	0.150441			0.0459696	0.0761702
0.13118	0.0236479			0.101851	0.0443996			0.143098	0.0321172
0.014573	0.0600222			0.0625841	0.0861341			0.0938451	0.083407
0	0			0.140301	0.128228			0.188754	0.118402
0	0			0.0934317	0.0845475			0.126012	0.0463639
0	0.0615063			0.156882	0.0997407			0.0632191	0.0792016
0	0			0.110951	0.0219183			0.11583	0.142321
0	0			0.0978933	0			0.196312	0.0644316
0.051557	0.0770297			0.132178	0.033258			0.156712	0.05276
0	0			0.0384645	0			0.187617	0.0845047
0.0264103	0.0299433			0.055687	0			0.0533974	0.045617
0.0262343	0.114116			0	0.0346518			0.0341629	0.0262367
0	0.033869			0.128621	0.221435			0.117178	0.15547
0	0.0974358			0.143114	0.0604467				0.0725593
0	0.0583226			0	0.0748548				0.113866
0	0.121307			0.0744935	0.157495				0.0779018
0.134332	0			0.0730318	0.13116				0.113028
0.0355145	0.0452386			0.100105	0.0419147				0.0383191
0.0214602	0.0849509			0	0.0294187
0.0455726	0.0775886			0.0381098	0.010061
0	0.0224311			0	0.128123
0	0.0712657			0.096644	0.13046
0.0125556	0.131752			0.0994827	0.0432414
0.0292719	0.164281			0.0838059	0.0811326
0	0.186657			0.037723	0.0786055
0	0.0923681			0.108599	0.0563685
0	0.0225479			0.085377	0.209179
0	0.150878			0.181262	0.114067
0.0414955	0.154186			0.290991	0.0465745
0	0			0.109034	0.0738484
0	0.026096			0.0798563	0.0641746
0.192708	0			0.139662	0.147184
0.159716	0			0.0687128	0.199428
0.0976292	0.0158947			0.0492368	0.151818
0.0924143	0.0315946			0.1104	0.125945
0.102213	0.100212			0.0549134	0.0477054
0.0780975	0.0582717			0.0918274	0.0703301
0.122016	0.112559			0.144933	0.024484
0.0689655	0			0.116668	0.0654268
0.0845904	0.172467			0.165749	0.0910892
0.149653	0			0.261174	0.0117954
0.127259	0.0840336			0.261194	0
0.112832	0.0516396			0.0469021	0.0567456
0.138351	0.0558306			0.101937	0.101786
0.0405729	0.0635042			0.19111	0.0662559
0.114728	0.042			0.118643	0.0283366
0.0559096	0.150898			0.175883	0.160607
0.0855578	0.0579542			0.123724	0.0840802
0.101819	0.0342044			0	0.0442529
0.0898844	0.13849			0.142274	0.212058
0.113716	0.187121			0.215855	0.212058
0.0849298	0.0528646			0.259373	0.212058
0.0684658	0.074308			0.126349	0.0529091
0.0621427	0.00904274			0.083956	0.059302
0.100309	0.0213975			0.126654	0.0345125
0.0401236	0.186978			0.12107	0.0459992
0.0750413	0			0.144023	0.0386907
0	0.0656743			0.148757	0.0808015
0.108407	0.207345			0.11698	0.0181243
0.114657	0.0818505			0.131871	0.0478454
0.0165333	0.09375			0.150189	0.0664132
0.0237496	0.126793			0.0780503	0.172236
0.0878182	0.063592			0.0496561	0.102738
0.061159	0.177029			0.0292056	0.0180411
0.0667443	0.0776624			0.132022	0.046796
0.0730087	0.177174			0.198435	0.0349597
0.113307	0.110186			0.119974	0.110268
0.108196	0.110186			0.133937	0.0811787
0.0120202	0.18889			0.17229	0.0455877
0.021405	0.157426			0.106513	0.110699
0.077775	0.0870671			0.162599	0.0462886
0.0781291	0.0781102			0.0542294	0.0373493
0	0.129082			0.0542294	0.135999
0.117403	0.121582			0.107262	0.130161
0.0587199	0.146888			0.107262	0.0485654
0.0241342	0.0839255			0.146935	0.142086
0.0139146	0.0833056			0.0808857	0.0195465
0.0168662	0.105328			0.0492021	0.0694119
0.0476417	0.0655729			0.120589	0.149127
0.0228123	0.0818029			0.0699496	0.0333556
0.0920535	0.0470463			0.0966688	0.0333556
0.12717	0.0163161			0.0912909	0.0182415
0.0179824	0.191894			0.211603	0.0129142
0.0222653	0.142929			0.105829	0.018939
0.0664349	0.104518			0.0834152	0.0289511
0.102066	0.102501			0.101692	0.032699
0.0282191	0.19442			0.0917431	0.0269553
0.0282191	0.178029			0.127639	0.0167639
0.0243368	0.07348			0.109357	0.0167639
0.0201256	0.155381			0.0825226	0.0832293
0.101131	0.0639604			0.222128	0.0206774
0.0497595	0.0434348			0.128291	0.0459763
0.0709062	0.0902894			0.130553	0.0880301
0.05804	0.114912			0.135007	0
0.0586562	0.120032			0.163418	0.0197114
0.0438187	0.106485			0.0646154	0.0442608
0.0640154	0.148819			0.0981731	0.0527213
0.169076	0.0209758			0.122252	0.0181061
0.0407689	0.0947742			0.122322	0.0181061
0.0263317	0.105036			0.0745145	0.0525366
0.0675908	0.0990929			0.0979048	0.0146548
0.0963914	0.0796481			0.10294	0.0712099
0.0455872	0.177218			0.130316	0.0614186
0.0978521	0.0664849			0.0938306	0.072995
0.0418625	0.118324			0.110034	0
0.0550051	0.14357			0.108691	0.0126971
0.106634	0.0943298			0.0431437	0.0254353
0.101123	0.0734284			0.0863912	0.139577
0.146145	0.101202			0.144859	0.030849
0.0823316	0.0872207			0.129928	0.0584829
0.0190905	0.0822348			0.0880993	0.0238772
0.138202	0.128639			0.160231	0.0373451
0.0969086	0.139313			0.139121	0.0571029
0.0398446	0.0827138			0.127525	0.0340713
0.0740097	0.1488			0.119877	0.00698066
0.0830792	0.123423			0.091055	0.00698066
0.126565	0.105162			0.156184	0.00940309
0.0608376	0.105162			0.051767	0.0278053
0.0257122	0.154202			0.134599	0.0225966
0.0363494	0.0707385			0.0715763	0
0.0170573	0.140984			0.0838481	0.0528129
0.022308	0.0365088			0.0476138	0.0332427
0.0847937	0.031175			0.0476138	0.0543882
	0.077711				0.107693
	0.152304				0.0570407
	0.0523656				0.0120595
	0.0523656

## Sheet: Fig. 4 H
norm Rab5 intensity at synaptophysin puncta
Pclowt/wt	Pclogt/gt
0.622962	0.937241
0.918879	0.95693
0.986553	1.18756
0.606247	1.09183
1.64227	0.55911
1.01133	0.812194
1.73554	1.01795
1.05808	0.741322
1.52849	0.880651
1.32889	0.765634
1.07462	0.933658
1.6225	0.811459
2.36287	0.543276
0.754166	1.05221
1.26145	1.45318
0.625073	1.69913
2.44634	0.808723
0.900373	0.63411
0.761187	0.868608
1.63119	0.914305
2.78735	0.957762
1.10659	0.826253
1.54488	0.5312
0.672721	0.976364
1.00979	0.646666
0.468453	0.818241
1.22614	0.345357
0.721697	0.388239
0.973294	0.4348
0.662644	0.151341
0.527505	0.650344
0.634782	0.427683
0.658582	0.419877
0.57952	0.343886
0.911106	0.589804
0.633725	0.67304
0.653351	0.775343
0.77899	0.367094
1.50846	0.353866
0.648617	0.575441
0.769536	0.649432
0.717506	0.31324
0.945575	0.497818
0.822431	0.191552
0.848343	0.0130196
0.758788	0.225364
1.17879	-0.137283
0.962832	-0.228389
1.4829	-0.0349808
1.86351	-0.0470247
1.33776	-0.158668
0.970959	-0.196655
2.02618	0.020937
1.38122	-0.0621556
0.603448	0.0157058
1.18265	-0.252141
1.2385	0.441709
0.841737	0.140241
0.729342	0.132388
3.71474	0.938393
1.13508	0.734188
0.614101	0.202653
0.614613	0.193311
0.968575	0.550025
1.34271	0.0862424
0.333586	0.58491
0.572338	0.225893
0.362824	0.422803
0.905332	-0.150687
0.615124	0.0884662
0.63411	-0.0463526
1.1053	-0.0704097
1.31261	0.202653
1.32071	0.17794
1.60404	1.0453
1.35573	0.452858
1.48837	0.756724
1.46287	0.955571
1.80179	0.714626
3.09171	0.603671
2.58743	0.598074
1.2182	0.985577
0.282674	0.853765
0.580704	1.63037
0.238129	1.05759
1.15886	1.28732
0.578416	0.598617
0.463686	0.400651
0.483232	0.276148
0.362007	0.400619
0.484575	0.581375
0.407929	0.743225
0.540813	0.479729
0.652728	0.518772
0.484415	0.652103
0.56914	1.29554
0.650184	0.334401
1.24746	2.15852
0.913105	0.682941
0.640684	0.612212
0.411303	0.535327
0.617572	0.756805
1.33079	0.833355
0.651384	0.578896
0.514902	0.659845
0.634701	0.622561
0.536046	0.649496
0.791946	0.580192
0.878429	0.634637
0.727839	0.987657
0.920335	0.316647
1.04274	0.788059
1.36763	0.769793
0.746456	0.263737
0.563077	0.748872
0.290608	0.738028
0.480128	0.515893
0.865713	0.385744
0.306346	0.743465
0.460327	0.716035
2.01939	1.94449
0.460918	0.43728
0.453897	0.673569
0.66965	1.77188
0.81413	0.867136
0.656758	2.04332
0.39219	0.950357
0.244638	0.873455
2.39765	0.915408
0.671074	1.89675
0.612197	0.796664
0.758389	1.3243
1.35939	0.804837
1.46367	0.95725
0.434144	0.592348
0.719425	0.978539
1.59485	0.738572
0.97259	1.51974
1.54285	0.937625
0.561238	1.21892
0.496459	1.28929
0.77152	0.846344
0.673729	0.715891
0.715522	1.41732
1.26125	2.00529
0.616819	1.04225
0.534415	0.978731
0.945031	0.862098
1.18359	1.57121
0.839962	1.72025
0.898422	0.576801
1.23239	0.799511
0.782044	0.780861
0.0797177	0.449819
-0.118778	0.709893
0.188945	2.20228
0.434719	0.934746
0.209898	1.92496
0.332897	0.885834
0.215081	1.21174
0.681406	1.53843
1.02494	1.62813
0.471011	1.05647
0.65076	0.856852
0.414774	0.783452
0.948325	0.581903
1.14376	0.813122
0.796615	0.303292
0.295789	0.929164
0.211273	0.578577
0.873694	1.51678
0.265319	0.52245
1.58442	0.316071
0.537197	0.600137
0.260409	1.14181
0.0468636	1.20968
0.647657	1.12244
0.382688	0.841018
0.308217	0.625376
0.357033	2.00829
0.136066	0.753383
0.591947	0.490302
0.203325	0.536863
-0.0158195	1.20834
0.281154	0.456345
0.351131	0.982123
0.459031	0.86149
0.594202	0.54977
0.491436	1.40558
0.211834	1.08308
0.217991	0.755014
0.371285	0.939705
1.18887	1.30016
0.685772	1.23607
0.257898	0.452202
0.797671	0.696521
1.02675	0.706597
0.571666	0.562838
0.340991	1.52785
5.23244	0.907843
0.069817	0.991112
0.0314767	1.3394
0.4824	0.970094
0.418869	0.94052
0.896582	0.713379
1.07966	1.20928
1.5191	1.08647
0.334962	1.15974
0.437487	0.797112
0.616899	0.723088
1.79048	1.23135
0.868129	0.972765
2.2094	0.903413
0.681134	1.24364
0.760132	2.11586
1.07838	1.11603
0.458345	0.735164
2.79471	0.632382
1.12515	0.524946
0.655847	1.99479
0.86293	0.922111
0.551962	1.04709
0.480065	1.42908
0.317159	1.08227
0.848135	1.17414
0.932891	0.664292
0.758517	0.751895
0.925981	0.931931
0.46359	0.84516
1.13524	1.23145
0.595659	0.48923
0.599834	0.732493
1.022	0.743898
0.646507	1.5622
0.639693	1.23102
1.25749	1.19995
0.72608	0.907635
0.810116	0.90989
0.779358	0.866737
1.53247	3.00032
1.07419	0.487631
0.624033	0.944039
1.26254	0.522835
0.619491	1.10455
5.37067	1.07352
0.354459	1.0794
0.593404	1.16264
0.354875	0.663892
0.591116	0.535295
0.716131	1.01881
3.15868	1.50016
0.283059	2.76895
2.3774	0.71234
0.430897	2.30762
0.500027	1.02638
0.925118	0.722097
0.672866	1.08303
0.943479	1.78557
0.469956	0.988312
0.370166	0.715906
0.24715	0.68902
0.464406	0.755445
0.367271	0.398508
0.331363	0.7141
0.546715	0.859684
1.34987	0.979244
0.511591	0.608871
0.735485	1.49824
0.903333	1.21748
0.59897	0.453722
1.10456	0.721633
8.38516	0.886458
1.5638	1.09808
0.821471	0.522514
2.05879	0.966848
1.04585	1.23188
0.940552	1.95562
2.18302	1.69971
0.79596	1.26262
0.960785	2.13865
1.80543	2.3764
1.14378	1.68679
0.592316	1.87942
0.573026	0.517301
0.45876	1.42083
0.84548	1.39845
1.04426	1.97599
1.65966	1.12404
0.245086	0.693434
0.544555	0.915937
1.23068	1.63328
1.32742	0.666228
0.838905	1.00015
1.55454	1.72111
1.39456	1.99654
1.21912	0.811459
2.28916	1.16931
1.90812	2.98703
0.821872	1.58164
0.769905	1.88402
1.94368	0.867153
1.05136	0.857012
0.45892	1.2295
0.953476	0.704375
0.530656	0.891145
0.340895	1.05819
0.654935	0.80159
0.56714	1.52357
0.921774	0.99631
0.50033	1.66802
1.12699	1.71399
0.824127	2.39674
1.48693	0.596058
1.20352	1.1476
0.37474	1.15408
0.619651	1.33223
0.670194	1.20275
0.783245	1.80842
1.19706	1.51882
1.17956	2.93384
0.681567	1.31787
1.44943	1.38348
1.42282	1.5063
1.88832	0.971982
3.11722	1.92557
1.90163	2.02768
4.97965	2.97372
1.98152	2.41008
1.2362	1.18711
1.45782	2.51275
1.97872	1.60264
1.58471	1.06294
1.43652	0.809699
1.23604	0.728239
1.34863	1.09301
0.775039	1.27011
3.39668	0.987977
0.467877	1.15059
0.866433	0.761987
0.860435	1.03825
0.517924	0.739147
0.721777	1.06728
2.03333	1.66713
1.12065	0.974892
0.823343	0.467412
0.333458	0.425875
1.28436	0.607223
1.22332	0.682909
0.860292	0.309929
0.883899	0.309097
1.01141	0.732797
0.514949	0.676767
0.543084	1.64165
2.6317	0.579711
2.74287	0.477857
0.927949	0.293439
0.614884	0.294286
0.688124	0.45772
0.825055	0.437231
0.558551	0.441917
0.937433	0.513781
0.915025	1.50692
0.719426	0.690634
1.09377	0.436303
0.723905	0.376499
3.03926	0.400507
0.52701	0.259818
0.290272	0.436335
0.802406	0.347645
0.726415	0.461623
0.787339	0.679598
0.706166	0.994966
0.606727	0.833212
0.705207	5.96878
0.817539	0.478451
0.577025	2.26986
0.65983	0.685336
1.09103	0.469693
0.537182	1.24453
1.02867	0.599413
0.653575	0.357929
0.706182	2.55806
0.828285	0.319358
0.423059	0.372669
0.563846	0.396623
0.633567	0.702096
0.848007	0.412758
0.620754	0.818949
0.803222	0.349063
1.30301	1.00405
0.624785	1.00447
0.676448	0.811201
0.661845	0.422049
1.51398	0.637891
0.630079	0.530321
0.633134	0.282776
0.595115	0.470132
1.44634	0.383563
1.10223	1.7974
0.689963	0.324408
0.661365	0.641337
1.74497	0.381211
7.97163	0.301996
1.84123	0.176354
3.66325	0.419636
0.652327	0.316591
1.35325	0.961475
3.90355	0.859416
0.848215	0.410531
1.06656	0.460697
0.924957	0.249317
0.74049	0.39633
1.20271	0.327561
2.01005	0.353026
0.829821	0.539095
1.11318	0.507416
0.557527	0.388867
0.456703	0.37869
0.785096	0.292838
0.695666	0.232881
1.7065	1.23931
1.32984	2.39734
0.42329	0.991264
0.460373	0.911725
0.850604	0.404247
0.240991	0.206121
4.8356	0.806799
6.85709	0.187348
2.79097	2.32286
0.854459	0.613344
1.51113	0.577634
0.698712	1.37379
0.598442	1.58682
0.278675	1.01495
0.337668	0.469501
0.260034	0.234129
1.04151	0.66186
0.689529	0.431632
1.69343	1.12259
1.34198	1.3011
0.186053	1.00028
0.340398	1.05514
0.210878	1.5427
0.503006	0.58704
0.188744	0.614169
0.96028	0.74897
0.452617	0.225418
0.707771	0.270534
0.171845	1.5823
0.217238	1.06969
0.318425	0.20141
0.837174	0.246673
0.713113	0.422735
0.217223	0.234284
0.239642	0.271274
0.159032	0.602281
2.04408	0.361699
2.51402	0.668999
1.08068	0.387942
0.785452	0.347105
0.723189	0.519751
1.62428	0.514116
0.595589	0.815657
0.46001	0.524793
2.22547	0.410292
3.72781	1.94124
0.807238	0.359039
0.648268	0.386369
0.806691	0.729048
0.707339	0.47149
0.953349	0.431455
0.84308	1.44879
0.550296	0.373363
1.1768	0.42642
0.366147	0.319305
0.418842	0.484149
4.33342	1.05514
0.759871	0.674488
0.411718	0.490902
0.49384	0.527576
1.39421	0.793878
0.330768	1.78461
0.712789	0.587163
0.728085	1.62471
0.518896	0.526744
0.81346	1.13601
0.531392	0.56839
0.635201	0.352555
1.08344	0.50932
1.15844	0.99616
2.27375	1.8674
1.8011	0.603615
2.8568	0.407316
0.886029	0.613167
0.661298	0.527761
1.35363	0.32282
3.40299	0.330344
0.32888	0.419011
2.13557	0.839603
0.637352	0.139172
0.894802	0.240536
1.92397	0.492213
1.46379	1.32121
1.5179	0.529989
0.719982	0.287472
0.301326	0.341654
0.477287	0.347444
0.529897	0.375707
1.42996	0.951306
0.65624	0.367743
0.212828	2.45946
0.174211	0.43554
2.45996	0.493076
2.30702	0.834152
0.731631	0.452748
0.864566	0.424045
0.195837	0.369339
1.19944	0.536489
5.12069	0.501641
5.73987	0.415557
3.44053	0.61494
1.13475	0.478621
1.37373	0.357204
2.11669	0.653488
0.249472	0.595628
0.439426	0.742471
0.492313	0.919149
0.279608	0.31326
0.308627	0.571166
0.859416	0.292668
0.985867	0.578019
0.808634	0.507216
0.288089	0.251052
0.337306	0.255693
0.314509	0.402297
0.295875	0.332125
0.967126	0.19532
0.66738	0.219991
0.429219	0.337629
0.623976	0.645501
0.568421	0.309251
0.356487	0.466232
0.471043	0.585606
1.25521	0.217639
0.995165	0.503762
0.588744	0.265091
0.334963	0.190756
2.82368	0.436396
0.511032	0.832186
1.34011	0.701387
0.637761	0.387017
0.616444	0.220199
0.500793	0.265068
0.580672	0.360326
1.22415	0.284403
0.860341	0.223205
0.885575	0.213175
0.5727	0.346596
0.798419	0.232071
0.530082	0.602528
0.191072	0.386601
0.542047	0.327476
0.932618	0.347459
0.713175	0.292768
0.364521	0.360049
0.565638	0.231871
0.762431	0.50128
0.45981	0.734777
0.468761	0.163634
0.321455	0.316945
0.615627	2.34405
0.463873	0.512921
0.747937	0.559371
0.603931	0.348123
0.137699	0.171313
0.265276	0.275314
0.192321	0.137854
0.63369	0.230468
1.19986	0.342687
0.278745	0.773617
1.12338	3.5139
0.335995	1.09664
0.298057	0.772697
0.359771	9.45944
0.332094	0.60044
1.64609	0.404446
0.229412	0.912031
3.90081	0.718335
1.06507	0.40166
0.546979	1.5705
0.640334	1.51538
0.35871	2.24745
0.32226	1.4041
0.575631	0.545164
0.882451	0.608468
0.949596	1.22688
0.62258	1.08776
0.603598	0.791608
0.517055	5.34703
0.684413	1.09213
2.58682	1.15055
0.390334	1.52343
0.412002	0.541479
0.428385	4.61787
1.24693	1.53541
0.32703	1.39112
0.469549	0.570374
0.673843	1.35693
1.57023	0.555577
1.18307	1.64998
1.03037	0.779739
0.420958	0.735561
0.331715	0.181684
0.382121	0.375379
1.1626	1.02403
0.478333	0.237332
0.988504	0.284594
0.929884	0.353597
0.866824	0.484003
0.73359	0.435069
0.716721	1.48629
0.831659	0.953838
0.56846	9.77283
0.338756	10.2066
1.34441	1.78031
1.11004	6.24258
2.0118	0.60397
2.85601	1.05818
0.648675	4.69353
1.25779	18.8805
1.69934	18.9705
1.22129	2.78677
0.615567	1.38645
0.648376	2.36318
1.12245	0.39799
1.25954	0.566876
1.08767	5.17231
0.999959	0.719307
1.00923	1.34094
1.29891	0.2571
0.833729	0.195653
0.397732	0.672372
0.72819	2.24689
0.960922	9.02408
0.839015	0.849127
0.322345	2.77691
0.610425	4.68136
0.28508	0.550379
0.381135	4.59465
0.579915	6.52045
1.40956	2.40352
0.620738	2.59889
2.48902	3.87594
3.07569	0.633707
0.569404	0.63932
1.17866	1.61785
1.43209	1.3306
0.674643	0.881908
0.667059	0.691797
1.40838	6.26574
0.497745	0.42987
0.463022	1.77698
0.391062	3.13878
0.726363	5.22751
0.795794	0.504185
0.695639	1.91175
0.777268	3.24888
1.85721	3.15668
0.665844	0.384478
0.606641	1.00857
0.684469	1.00937
0.646847	0.844428
1.43953	0.652889
0.643419	0.788252
0.557477	1.16365
0.568132	0.439683
0.839372	0.594799
1.0931	0.437712
1.19707	2.97234
0.435484	0.612825
0.945725	0.541037
0.570775	0.468249
0.375693	5.90233
0.384407	0.725648
0.457408	1.27218
1.03785	0.9306
0.964379	0.599742
1.92085	0.540223
0.522368	1.28261
1.46771	0.89432
1.70195	1.5952
1.07446	0.606898
1.09232	1.46684
1.10168	0.255271
2.88181	3.35784
1.37449	0.71008
0.776168	1.61371
1.12492	0.892349
1.27815	1.52801
1.04589	1.42416
1.04712	0.497331
0.45875	0.655875
1.05915	0.375822
1.04455	0.883435
1.32233	1.36911
1.02528	0.606754
1.58913	1.06218
1.33564	0.550278
0.414715	1.26914
0.622951	1.03687
0.81319	2.26112
0.867195	1.22368
1.57779	0.824232
0.496958	2.88011
0.585786	0.396876
0.921372	0.669301
1.33292	0.823488
0.741802	0.752529
0.796065	2.59509
0.556592	1.17197
1.0825	0.534109
2.15975	2.32079
0.841114	0.510956
0.47819	0.912588
1.29027	0.793779
1.51073	0.49623
1.26083	1.1913
0.741816	0.896119
0.63622	5.39815
0.640491	1.39332
1.58777	3.23436
0.763313	0.402346
0.960722	0.989789
2.39334	0.158459
1.51963	1.29515
0.259369	0.918558
0.935927	0.440068
0.833201	0.586444
0.916344	0.893462
0.571574	0.582401
0.74983	0.490202
1.0159	0.24333
1.1574	0.389362
0.439782	0.249772
0.629264	0.422357
0.918772	1.06101
5.63743	0.422542
0.836829	0.27931
0.495887	0.621423
0.52441	0.436354
0.332557	0.339699
0.980576	1.55978
0.799507	1.9178
1.09047	0.515112
0.286208	0.709051
0.213334	1.03545
0.337314	0.884592
1.45134	0.502915
0.971549	0.518269
2.45377	1.78614
0.720277	0.686383
0.651104	1.38695
0.788223	0.413173
1.09733	0.645505
1.92064	0.974377
0.592542	0.282009
0.891634	3.60156
0.450366	0.709708
0.482047	0.698381
1.3194	0.294764
0.423242	0.728462
0.819804	0.409359
0.353539	0.512184
1.22665
0.910502
0.966178
4.18912
0.729133
0.734033
0.568332
0.539266
1.14642
3.49384
0.579631
0.470206
0.944626
2.05489
0.966579
1.49532
0.507057
0.695954
1.24605
1.46331
7.66364
0.35554
1.47913
0.885093
0.640134
0.974649
0.64869
0.47579
0.941011
0.374679
0.592442
1.35321
1.05359
0.740289
0.962765

## Sheet: Fig. 4 I
norm EEA1 intensity at synaptophysin puncta
Pclowt/wt	Pclogt/gt
0.677109	0.217271
0.729737	0.190111
0.734747	0.0235452
1.05687	0.179856
1.2841	0.307491
1.05681	0.667433
0.544986	0.211734
0.583628	0.5085
0.605424	0.44678
0.478955	0.645694
0.556467	1.00977
0.846767	0.289946
2.41318	0.568881
1.17092	0.14471
1.02819	0.718839
1.35328	1.40469
1.89955	1.11474
1.25648	1.50633
1.68275	0.97061
1.25357	1.3175
1.62161	0.915537
0.698322	1.19383
0.976208	0.719945
0.865531	0.865704
1.48698	0.467764
0.904056	1.39641
0.832604	1.4903
0.515614	1.7778
0.235283	1.81918
0.508677	0.874213
0.81267	1.14015
0.976614	1.4646
0.347589	1.10262
0.549707	1.4938
1.53891	0.70928
2.06256	2.66128
1.46355	0.783121
1.5332	0.415892
1.71393	0.377604
0.777821	0.794718
1.58239	0.62046
1.70181	0.795012
1.16311	0.74349
1.55581	0.637768
1.46763	1.14493
0.711029	0.807016
0.898345	1.447
1.10926	0.905628
1.238	0.985473
1.10541	0.960062
0.97924	0.646687
1.2869	1.33504
1.1116	0.656652
1.32263	0.832777
0.625997	0.668189
1.56374	0.997593
0.861393	0.646394
1.63822	0.888899
1.40661	0.529367
0.683346	1.10034
0.334708	0.345083
0.622442	0.626636
0.990371	0.0597377
0.502673	0.794718
1.04195	0.819663
0.711202	0.686957
1.17547	0.952485
1.1116	0.851545
1.49718	1.34209
1.5635	0.657818
0.524646	0.516426
0.414203	0.899741
0.935527	0.385414
0.848573	0.193316
0.541258	-0.00378815
0.480588	0.000699721
0.381742	0.00862587
0.498652	0.155318
0.610784	0.23324
0.547142	0.361808
0.558156	0.754738
0.334768	0.782365
0.400623	0.0688863
0.365246	0.022556
0.29531	0.17292
0.362275	1.04562
0.730843	0.0716289
0.866291	0.304519
0.755265	0.469979
0.712019	0.203052
0.889893	0.163071
0.781082	0.156311
0.719711	0.314657
1.07225	0.42149
0.886338	0.377777
0.627746	0.511939
0.682763	0.304926
0.447657	0.583451
1.09662	0.443985
0.964083	2.08296
2.5041	0.797634
0.352543	0.394152
0.467647	0.249965
0.421373	0.375155
0.363385	1.60407
0.905222	0.329054
0.773739	0.113005
0.837265	-0.0537941
0.132123	0.233647
0.761852	0.437631
0.532633	0.147042
0.615799	-0.0226123
0.542831	0.480351
1.73538	0.991127
0.674077	0.254453
0.682586	0.44142
0.627803	0.48921
0.307552	0.423118
0.232191	0.331386
0.302243	0.578907
0.248276	0.989144
0.442119	0.494807
0.588638	0.809348
0.595865	0.176008
0.538926	0.0451079
0.315301	-0.00553745
1.0356	0.877418
0.482216	1.2763
0.450106	0.180029
0.571737	0.513515
0.630018	0.158756
0.44043	-0.0438854
1.03845	0.968454
1.321	0.355398
0.80591	-0.0743072
0.501157	0.160972
0.22788	0.452611
0.766219	0.700188
1.00063	0.258591
1.10075	0.145003
1.43435	0.197398
1.07493	0.857372
1.16457	0.419447
0.776421	0.576808
1.08542	0.75847
1.26639	0.402778
1.09906	0.877595
0.699781	1.02225
0.377721	1.23795
1.59148	1.15484
0.39835	0.79239
0.360292	0.337157
1.30852	0.361925
0.542187	0.674777
0.649715	0.363208
1.1018	0.325443
0.67472	0.069003
0.76348	0.261217
1.36687	-0.0875979
1.54252	-0.0279165
1.06666	0.676176
0.709513	0.249326
1.30415	-0.0236015
1.28002	0.102984
1.57137	0.0909758
1.90765	0.124723
1.46717	0.69506
1.48465	0.857428
0.708697	0.922353
1.02493	0.694477
1.06998	0.635146
1.54398	0.27561
1.75531	0.848979
1.78392	1.40073
1.20169	0.692378
1.84395	0.606007
1.3636	0.535661
2.26217	0.59225
0.521908	0.475223
0.945492	0.702287
1.20129	2.08728
1.39432	0.463215
1.24057	0.747922
0.78481	1.22139
1.21038	0.636895
1.13164	0.955224
0.903412	0.456749
0.629552	0.217621
0.831727	0.636601
0.424051	0.615039
1.72145	1.07406
0.733698	0.41898
0.290063	1.01059
0.657468	1.87175
0.454939	1.81452
0.300498	2.26631
1.02464	1.15478
1.79062	1.42672
0.803638	0.671399
0.418807	1.20408
0.549474	1.08986
1.04667	0.764646
0.369268	0.499291
0.301837	0.41187
0.872001	0.510543
0.498768	0.439437
0.219893	0.503779
1.30311	0.987922
1.22489	0.760102
1.35468	0.838897
0.0720954	0.189821
1.00039	0.07635
0.960239	0.0825269
1.66019	0.29024
1.5786	0.287674
1.44385	0.120935
0.747568	0.659624
1.85887	0.720295
1.31389	-0.121691
0.974342	0.431338
1.54054	0.306675
1.38137	0.359476
1.62825	1.15274
2.0178	2.02421
1.68036	-0.0948243
1.41547	-0.118836
0.950386	0.535717
1.02941	0.374628
1.67301	0.561595
0.77129	0.609385
1.37549	0.543293
0.634913	0.451561
0.61084	0.699082
2.53458	1.10932
2.00172	0.614983
0.901896	0.929523
0.818207	0.296183
1.08292	0.165283
1.91109	0.114638
1.04766	0.997593
1.06375	1.39647
2.75599	0.300205
1.28247	0.63369
1.77984	0.278931
1.88778	0.0762897
1.51	1.08863
1.71014	0.475573
1.60687	0.0458679
1.2355	0.281147
1.38592	0.572786
1.33061	0.820363
1.2524	0.378766
1.22384	0.265178
1.66369	0.317573
1.13409	0.977547
2.32331	0.539622
1.97747	0.696983
2.38614	0.878645
1.80694	0.522953
2.39168	0.99777
1.18182	1.14242
1.89244	1.35812
2.92198	1.27501
2.83945	0.912565
1.83025	0.457332
1.98598	0.4821
2.02083	0.794952
1.37246	0.483383
1.94676	0.445618
1.0237	0.189178
1.31668	0.381392
1.1743	0.0325772
1.79068	0.0922586
1.18835	0.796351
1.87583	0.369501
1.32531	0.0965736
1.89133	0.223159
6.32045	0.211151
1.77268	0.244898
1.94693	0.815235
0.707297	0.977603
1.10355	1.04253
0.587239	0.814652
0.806726	0.755321
0.379876	0.395785
0.990194	0.969154
1.29017	1.5209
1.06742	0.812553
0.798683	0.726182
0.775371	0.655836
1.5051	0.712425
0.568065	0.595398
0.425044	0.822462
1.011	2.20745
1.20391	0.583391
1.00872	0.868097
0.548191	1.34156
0.641323	0.75707
0.515087	1.0754
1.49881	0.576924
0.996198	0.337796
1.35509	0.756777
0.908367	0.735214
0.561711	1.19424
0.6137	0.539155
0.139582	1.13077
0.417524	1.99193
0.175891	1.93469
0.42009	2.38649
0.292628	1.27495
0.359009	1.54689
0.593126	0.791574
0.532922	1.32426
0.686784	1.21003
0.369674	0.884822
1.61054	0.619466
0.514327	0.532045
2.36277	0.630718
1.24196	0.559612
0.875496	0.623954
1.35346	1.1081
1.81633	0.880277
1.42957	0.959072
2.17347	0.309997
0.294028	0.196525
0.0207463	0.202702
0.102167	0.410415
0.417874	0.407849
0.334881	0.24111
0.570454	0.779799
0.24099	0.84047
0.0541439	-0.00151606
0.370434	0.551513
0.269899	0.42685
0.707189	0.479651
0.22683	1.27291
0.435299	2.14439
0.752289	0.0253508
0.457272	0.00133912
0.257775	0.655892
0.39829	0.120175
0.568355	0.0729117
0.751239	-0.120465
0.292335	-0.0427192
0.480001	-0.132645
0.174198	-0.0910361
0.537816	0.0455181
0.23889	0.0417299
0.135211	-0.172336
0.562584	-0.0416696
0.338552	0.0450516
0.837787	0.29671
0.0754131	-0.076346
0.232307	-0.0761128
0.443692	-0.223742
1.37543	-0.00466079
0.77018	0.124723
1.80595	0.0237222
1.17104	0.153396
0.837844	-0.0303655
0.643189	-0.119765
0.744302	-0.023312
0.687014	0.018241
0.650298	0.202352
0.529074	0.283013
0.233124	0.209406
0.827762	0.287501
1.33131	1.00174
1.21288	0.227703
0.924919	0.492065
0.824847	0.0131137
0.879923	0.979646
0.878641	1.42415
1.08321	0.704326
1.25595	0.825956
1.00465	0.772283
1.97386	0.618188
0.498185	0.872118
0.895193	0.612127
1.13572	0.589161
0.634446	0.452434
1.54305	0.313029
0.779156	-0.0375919
1.34133	0.305742
1.76492	0.126469
1.49117	0.362685
1.28451	0.667144
1.12476	0.426094
2.11181	0.858477
1.75729	0.838664
1.42071	0.92148
2.0308	0.449579
2.54419	1.55226
0.89362	0.801889
1.24628	0.615216
2.16513	1.40743
2.14398	1.14487
1.67569	0.612594
1.36389	1.51927
0.63899	1.0184
0.4543	0.350504
1.09877	1.08642
0.838137	0.694127
0.831027	0.573602
0.729093	2.18962
1.07522	0.79775
1.06695	0.987922
0.457095	1.08181
1.09772	0.635845
1.37438	0.505995
1.1595	0.307375
0.655369	0.177407
0.57797	0.138883
0.494803	0.0604374
1.46751	0.756254
0.515144	1.43237
1.7088	0.244721
0.933074	0.184167
0.909939	0.573076
1.55668	0.371833
1.07622	0.305275
1.54065	0.310696
1.34582	0.237905
1.59841	0.603035
1.60954	0.495857
1.08263	0.339896
1.07178	-0.0476735
1.32431	0.367056
2.17586	0.0108417
1.16142	1.92484
1.44449	-0.120465
1.25927	0.384597
1.15064	0.108405
1.35421	0.28954
2.68629	0.97067
2.14194	0.450922
1.90561	0.164877
2.06501	1.10437
2.77039	0.719595
1.00622	0.150947
1.09428	0.179796
2.9764	0.416825
1.58168	0.589571
1.2869	0.233823
1.35043	-0.0642819
1.20053	0.284002
1.93446	0.115631
1.301	0.247577
1.56368	0.594116
2.32348	0.599014
1.18106	0.163827
1.56024	0.531519
1.43278	0.619527
1.92251	0.357903
0.645227	0.359359
0.968744	0.213483
1.04649	0.236329
0.950969	0.326549
1.27041	0.443285
0.862205	0.387859
1.15303	0.398178
0.480407	0.160272
0.250315	0.22182
0.326022	1.97718
0.61154	0.209345
0.751239	0.583628
0.50098	0.133932
0.971599	0.0905093
0.257948	0.336807
0.581585	0.105489
1.05966	-0.0446414
0.961867	0.231724
0.740808	-0.0555997
0.69535	-0.00209916
0.626226	0.326259
0.743663	0.354115
0.440893	0.841753
0.50203	0.171287
0.264595	0.154502
0.950909	0.146636
0.296123	-0.19151
0.201186	0.0776329
0.292335	0.265528
0.391357	0.205268
0.86687	-0.108051
0.554135	0.0575259
0.313318	0.6415
-0.0683073	0.457449
0.0509349	0.307314
0.373695	0.28348
0.188478	0.00378815
0.284935	0.245305
0.0832829	0.671222
0.820829	0.417874
0.859817	0.577097
0.509666	0.395845
0.611251	1.43604
0.532568	0.610378
0.283652	0.736324
0.475806	0.740868
0.927074	0.775078
0.876662	0.911166
0.810571	0.131483
1.21994	0.181489
0.444797	0.433264
0.976204	0.0806047
1.15548	0.166276
0.845541	0.539509
1.06339	0.49673
0.647793	0.393746
0.199843	0.411464
1.30672	0.664345
0.973292	0.450862
1.84068	0.797284
1.74569	0.192098
1.14091	0.38052
0.63299	0.448123
1.30922	0.230735
0.958489	0.182655
0.97673	0.6137
1.47148	0.579663
0.90108	0.467824
1.06462	0.535021
1.65844	0.606996
1.89308	0.694188
2.70214	0.522897
2.63203	0.584677
1.77325	1.00891
0.925791	0.990194
1.1352	0.843795
1.4308	0.461937
0.829222	0.851545
1.37327	1.87554
1.68817	1.5149
0.89432	1.87298
0.879051	0.379237
1.60506	0.292339
1.19027	0.489797
0.945315	0.468874
1.23276	0.87474
0.759809	1.02528
1.06211	0.77881
0.699194	0.547669
1.22553	1.83556
1.17891	0.971836
0.858361	1.04008
1.33358	1.01916
1.16031	1.21108
1.64789	1.45901
1.56682	1.35119
1.00849	0.773449
1.02021	1.29086
1.48121	1.49875
1.58979	0.993865
1.64882	0.920025
1.8436	1.33126
0.996021	1.49153
0.814532	1.57015
0.606236	1.78066
1.92683	2.55469
1.3492	1.46664
1.63023	1.33586
0.91431	1.13473
1.3988	0.886454
1.16981	2.12743
1.24366	1.83667
1.1641	1.05232
1.24086	1.61112
1.78567	0.734341
1.24704	0.706775
0.880273	0.722337
0.329927	0.569292
0.447657	0.873751
0.552096	0.773972
0.802878	0.94357
0.500807	1.29343
1.0733	1.28556
1.18922	1.14767
-0.0577592	2.0389
0.511416	0.91542
0.777816	2.96971
1.21766	2.19737
1.20787	1.47241
1.16585	0.883949
1.38708	0.704326
0.883422	2.14748
0.675299	2.66094
0.336168	1.61747
0.273748	2.92815
0.0489564	1.32082
0.324683	1.19202
0.280797	0.712252
0.545742	1.24756
1.2394	1.58594
0.52208	0.670643
0.329114	1.42474
0.576924	1.20863
0.320838	0.77852
0.3987	0.794722
0.57238	1.27198
1.40667	0.816575
0.923813	0.44043
1.06672	0.80451
0.751533	1.29798
0.770244	1.17605
0.993459	1.19966
1.19441	0.538632
1.94204	0.659568
0.887037	1.26348
0.617954	0.612883
0.754971	0.658345
1.58705	0.474234
1.21423	0.566843
1.12255	1.15082
1.8193	0.653158
0.65403	1.41891
1.21819	1.12943
1.43476	1.60086
1.24191	0.99066
0.975624	1.43849
0.913265	1.43453
2.08389	1.2837
1.18124	1.02761
0.726126	0.445385
0.927891	1.295
0.980985	0.975858
0.450922	0.482277
0.667494	0.7446
0.870135	0.788485
0.942464	1.18602
0.629202	1.15105
0.596275	1.04743
1.73707	0.695816
1.1662	0.57203
1.49887	0.911982
2.42064	0.433437
1.90066	0.755381
1.09149	0.443869
0.955694	0.560255
1.92601	1.09621
1.65396	0.535194
1.42008	0.935411
2.02072	0.53817
0.713068	0.237322
0.575175	0.462576
1.20333	0.947185
0.423062	0.71785
1.09638	1.04679
1.7324	0.821179
2.08319	1.33679
1.02149	0.989555
0.955984	1.03128
1.34134	1.02528
1.20898	1.07051
1.30637	0.398411
0.547902	0.294727
0.881033	0.398061
0.680431	1.02289
0.925035	0.478489
0.415546	0.621859
0.252648	0.61265
1.41157	0.837092
1.04562	0.231318
0.570164	0.760275
1.20077	1.01287
0.719595	2.86701
0.521614	1.01258
0.873517	0.64867
1.06276	0.0620138
0.868736	0.648436
0.905222	0.717616
0.517363	1.11836
0.464502	0.545163
0.655952	0.531873
0.601229	0.91006
1.09219	0.727404
0.911399	0.765579
0.807249	0.826133
1.46839	0.314951
1.37106	0.173619
1.0835	0.187666
1.7669	0.880977
1.78124	0.549301
0.995731	1.02376
1.93365	0.795245
1.29926	0.343334
1.21761	0.313901
2.13093	0.747861
0.964316	0.420267
1.24564	0.784287
2.89528	0.313668
1.66952	0.0367756
0.715923	0.442996
0.875556	-0.0194635
1.27886	0.154389
1.58996	0.484199
1.48325	0.643832
1.41425	0.222226
0.540325	-0.0575782
0.602975	0.120875
0.520042	0.68935
0.0940079	0.0140467
0.122857	0.596448
0.0732616	0.885988
1.18782	0.739179
0.513804	0.446257
0.403421	0.531233
0.963621	0.721461
1.33213	0.41403
1.3622	0.528495
1.73485	0.389379
1.04428	0.343217
1.89326	0.383314
0.840064	0.307491
1.0578	0.369911
0.395789	0.403365
0.635906	0.436003
1.2137	0.704852
0.0666183	0.739935
0.0514617	1.03169
1.04364	0.79198
0.678219	0.693255
0.332553	0.348288
0.629319	0.619293
0.404005	1.01602
0.464209	0.500634
0.957034	0.678275
0.981685	0.973409
0.42009	0.669183
0.683173	1.19709
0.776538	0.272988
0.350677	0.829455
1.59294	0.546969
0.887037	0.276603
1.29763	0.373756
0.752466	1.68724
0.862153	1.78963
1.6416	0.734168
0.658868	1.27793
1.17052	0.80486
1.86861	0.508154
1.22886	0.623198
2.19737	3.141
1.90095	1.46052
0.782425	0.882433
1.37281	0.857721
1.44799	1.08286
1.09918	1.45038
1.19721	0.592543
1.10396	0.570224
0.912215	0.87579
0.521324	0.706658
1.08513	0.929467
1.04789	1.30987
0.82169	0.597674
1.03198	0.879405
1.68327	1.03624
1.40539	0.840703
2.14171	0.783591
0.941181	2.20733
1.22327	1.79063
0.899745	0.992932
1.26015	1.15472
0.663822	2.31853
0.683057	1.75059
0.725076	1.52696
0.87585	1.83434
1.25619	1.67663
0.656363	1.41314
1.13182	1.18969
0.767095	0.746989
0.620576	1.26161
0.915714	1.90771
0.618188	1.27601
0.207073	1.65332
0.405637	0.974575
0.219487	1.00879
0.301375	0.637655
0.533682	3.36287
0.372883	1.68735
1.04113	2.7068
0.33127	1.95999
1.19528	1.26196
1.02615	0.367812
0.817041	1.2679
1.80432	1.30479
0.705902	0.612067
0.237439	2.08844
0.388213	2.11187
0.373699	1.40795
0.44684	0.743434
0.256496	0.584267
0.214943	0.575002
1.09364	1.39805
0.55064	0.460248
1.11497	0.747455
0.862153	1.2925
1.97415	0.555012
1.53699	0.760392
1.22927	0.75672
1.24809	0.740112
1.0852	1.40009
0.548485	0.886338
0.887098	2.28811
0.487871	0.669066
0.616555	0.807193
1.01374	0.456226
0.391301	0.68224
0.747978	0.415313
1.24879	0.131367
0.989438	0.300442
0.815762	0.789125
0.943453	0.341122
1.07663	0.448183
1.29314	1.04352
1.34105	0.211211
1.11772	0.249209
0.850262	0.587999
1.24978	1.63589
1.71813	0.572436
1.09924	0.0523946
0.844145	0.000349861
1.67447	1.7802
0.722337	2.03768
0.129211	0.801772
0.0177785	0.541198
0.143431	1.0177
0.226364	1.37893
0.298109	1.36395
0.371077	1.00593
0.246531	0.756897
0.452784	0.973759
0.192037	0.793785
0.130027	0.846996
0.197691	0.65467
0.0825269	0.481111
0.0645754	0.874973
0.883832	0.753632
0.590271	0.879461
0.876546	0.871068
0.748328	0.979996
0.788369	0.347122
0.0815376	0.471262
0.386753	1.01269
0.728104	1.08263
1.29623	1.15006
1.0835	0.662362
1.17483	0.445618
0.684512	1.57166
1.05908	0.989844
1.26674	0.513165
0.723677	0.801889
0.214943	0.573836
0.245248	0.933605
1.01036	0.443169
0.67361	0.629202
1.13456	1.61369
0.966826	0.734575
0.687191	2.12166
1.27601	1.14866
0.349571	1.63857
0.408376	1.78637
0.595165	0.701587
1.97269	1.23363
0.461004	1.33638
0.845774	1.0525
0.753982	0.929
0.43472	0.786036
0.728571	0.478545
0.549358	0.441946
0.297233	0.743317
0.584734	0.59872
0.3241	1.20251
2.12994	1.22752
1.7637	1.83405
2.51715	1.1943
2.36038	0.924629
1.44974	1.56968
1.73048	1.7774
2.48493	1.22273
0.482743	1.48436
0.625997	0.697389
1.01595	0.326199
1.02056	0.33733
0.449173	0.298576
0.477206	0.491542
0.313785	0.271649
0.42149	0.347878
0.42149	0.251192
0.37224	0.588232
0.322061	0.726998
0.2625	0.863199
	0.409948
0.870237	0.994215
0.476769	0.704153
0.873851	0.675653
0.462097	0.632874
0.435913	1.1352
0.977012	0.519808
0.251025	0.698672
0.295043	0.340418
0.690318	0.465315
0.796858	0.475223
0.703853	0.344673
0.71267	0.374049
1.23051	0.169192
1.32916	0.403421
3.66536	0.28995
1.06731	0.341645
2.02218	0.224208
2.08246	0.245188
1.73437	0.894497
2.9992	0.252241
1.57928	0.090453
1.53119	0.506928
0.952853	0.357614
1.37386	0.716856
1.37048	0.513865
1.66168	0.540321
1.34271	0.808998
1.16685	0.827006
1.33797	1.15629
1.90209	1.26796
2.17457	0.754215
1.9644	0.439381
2.74387	0.159166
4.07937	0.346599
0.595724	0.545392
0.973398	0.097213
0.979037	0.486182
1.19665	0.487927
0.90748	0.404588
2.12535	0.493814
0.901841	0.663762
0.812886	0.600469
2.38676	0.644938
0.537485	0.414963
0.475866	0.264129
0.658714	0.468986
0.542454	0.421606
0.925315	0.506755
1.07904	0.413037
0.823961	0.567249
0.928695	0.55775
1.31674	0.535194
1.40478	0.885288
0.632297	0.715457
0.586254	0.106012
0.527111	-0.0375919
0.71943	0.346656
0.564805	0.423295
0.30565	0.694477
0.532516	0.195882
0.266383	0.486704
0.359839	0.463686
0.106104	0.470735
0.384434	0.344617
0.521005	0.495097
2.07186	0.322821
1.13953	1.01578
2.37209	0.674077
1.12217	0.258595
1.07589	1.1412
0.807699	0.634856
0.764367	0.570048
1.69171	1.17372
1.10726	1.0075
1.51811	0.767968
0.438172	0.631185
1.49757	0.408842
0.80703	0.322994
0.058021	0.230152
0.852403	0.408549
1.03299	0.385003
0.743822	0.542481
0.884007	0.472135
0.461411	0.552852
1.21336	2.91626
1.85943	0.450628
0.746532	0.626636
0.39325	0.284179
0.471582	0.44107
1.30501	0.443692
0.617406	0.479828
1.73618	0.491425
0.64292	0.822691
0.551722	1.63583
2.51317	0.861216
1.14699	0.234756
1.22961	0.434776
1.63054	0.478195
0.424169	0.349044
0.644945	0.574881
0.360743	0.825024
0.25509	0.390714
0.224389	1.45394
1.02013	0.493521
0.072024	1.04317
0.833665	1.94035
0.972277	1.84634
1.49395	2.4478
3.53601	1.43266
1.64702	1.36791
0.83435	1.88521
0.690318	1.94542
0.489869	0.736963
0.472486	1.20093
0.628247	0.993455
0.962105	0.643361
0.183082	0.646683
0.27766	0.668306
0.353515	0.551569
0.456676	0.987512
2.67436	0.41968
1.00569	1.02662
1.25219	0.571909
0.813354	0.869026
1.32126	1.54357
1.78019	1.30747
1.20252	0.805733
0.848789	1.2281
1.16799	0.68002
0.676782	0.794775
0.95195	0.988911
1.15986	1.80712
0.204296	0.962394
0.400477	0.811327
0.621471	0.918215
0.78717	0.857838
1.59464	1.66363
0.544494	0.970377
0.564354	1.29576
0.680848	1.42794
1.05218	0.955051
0.880393	2.02054
0.426427	0.818903
0.779491	1.08595
0.544494	0.928824
0.78175	1.33947
1.72805	0.954291
0.315136	1.33201
1.03142	1.18713
0.944053	1.09574
0.972043	1.64049
0.693464	1.31406
1.26076	0.842858
3.25788	0.879807
0.516706	0.891288
0.769772	0.992639
1.17746	0.739585
0.998444	0.981041
1.83188	1.58367
1.9136	1.2855
1.68018	2.06402
2.42286	1.48972
2.20344	0.843791
1.29327	1.17133
2.90596	1.44793
0.783089	0.492125
0.444932	0.595105
0.894599	0.292451
1.12013	0.324216
1.86959	0.525692
0.366148	0.927247
4.3376	0.539216
0.581721	1.09603
0.574961	0.383781
0.560506	1.29821
0.984675	0.317279
0.285775	0.344034
1.21132	0.498535
0.571114	0.492937
0.623045	0.236618
0.140855	0.754561
1.10341	0.490376
0.262987	0.843614
0.334995	0.243905
1.5813	0.0581653
1.54361	0.355571
0.0792201	0.0540273
0.295494	0.379176
0.112865	0.655369
0.882184	0.229163
1.22058	0.215349
0.726205	0.355165
1.13095	0.295833
1.92421	0.218844
2.37321	0.321771
1.76574	0.311396
0.293688	0.310057
2.95765	0.486182
0.665708	0.746345
1.92082	0.963677
1.20048	0.744829
0.644477	0.562121
0.253719	0.480234
1.58221	0.523946
1.04584	0.573309
2.69827	0.397245
1.28469	0.543937
0.902059	0.200719
0.0706533	0.898518
0.409029	0.307841
0.438826	1.13892
0.589634	0.965366
0.770675	0.732302
1.56529	0.556057
0.631627	0.871475
0.56074	1.72506
1.08243	0.515904
1.80029	0.174259
0.793712	0.318039
0.56007	0.938965
0.383764	0.43472
0.99575	0.692961
1.53076	0.456922
1.69102	0.44043
1.38967	0.448646
3.09829	0.341878
2.58813	0.652108
2.0784	0.942577
0.863462	0.934361
1.07475	0.479711
0.574743	0.248976
0.423047	0.940888
1.47771	0.661313
1.12217	0.979879
1.35874	0.738829
2.47729	0.737313
0.586254	0.908194
0.462315	0.560022
0.754647	0.749027
1.99578	0.468697
1.28221	0.426094
0.928695	0.810454
0.356677	1.1331
0.667296	0.752582
0.535678	0.814303
0.655552	0.585723
1.31743	0.445618
0.447642	1.33312
0.322815	0.833243
0.900704	1.51816
2.00209	1.68199
0.171571	1.25327
0.635007	1.18351
0.244701	1.97625
2.11925	2.25681
2.0091	1.00605
1.88494	1.06287
1.35512	0.619937
2.39263	1.13071
1.55152	0.63223
1.05354	2.15943
3.48002	0.917926
2.99739	1.54276
2.49106	1.04556
0.960532	0.803927
1.13955	1.21743
0.714025	2.43242
1.81135	1.91762
1.48334	1.06794
0.936374	0.698672
1.09551	0.693601
0.30565	1.94897
0.53817	1.28912
0.463218	1.28428
0.542002	1.28964
0.570444	1.12931
2.55584	1.38756
0.920798	1.09615
1.12284	0.727521
1.65649	1.07097
5.34893	1.07464
0.933212	1.01584
1.13028	1.05325
0.409262	1.05961
1.14179	0.854456
1.25467	0.726821
0.214	2.22849
0.28308	1.54363
0.429589	1.46215
0.623714	0.661313
0.893025	0.789824
1.00724	1.25572
0.851717	1.34961
0.30227	1.26248
0.853742	1.15455
1.13727	0.671049
0.828011	0.841053
0.517392	0.504539
0.975875	0.361635
0.415586	0.475107
0.517174	0.749317
1.7917	0.775605
0.622811	1.65763
0.686019	0.540382
0.735909	0.285052
1.08807	0.512871
1.02508	0.583628
0.956015	0.448413
0.543124	0.57949
0.329357	0.689989
0.277878	0.489153
0.499557	0.414496
0.232505	0.527907
0.360057	0.830155
0.108799	0.704792
1.96259	0.484899
1.29529	0.39969
0.699118	0.173097
1.79644	0.356387
1.24338	0.216515
3.8166	0.27456
0.925081	0.939022
0.900471	0.932555
0.291647	0.577624
0.338157	0.55029
0.36593	0.690339
0.28375	0.856555
0.175621	1.6701
1.11358	0.471725
0.410166	1.10139
0.577889	0.38652
1.03209	0.964027
0.667514	0.84659
0.923508	0.680603
0.506784	1.20338
2.20368	0.987339
0.244467	1.00931
1.60548	0.456363
3.02854	0.729154
0.574058	0.89432
0.251928	1.06969
0.146275	1.61054
0.266383	0.885288
0.831406	0.684219
0.235682	0.502207
0.32213	0.679731
0.0451552	0.246121
0.0909801	0.858944
0.497081	0.98413
0.539977	1.17063
0.283984	1.0388
0.474059	0.681014
0.53275	0.74949
1.31562	0.545626
0.805441	0.509666
0.367736	0.902536
0.794834	0.650065
0.367955	1.24284
0.816048	0.816398
0.769772	1.56152
0.577002	0.90825
0.651035	1.26808
1.04833	0.94852
0.659166	0.461466
0.90815	0.586073
1.39395	1.10576
1.52443	1.76585
0.607017	1.3168
0.707701	1.15128
0.339513	1.03833
0.364123	0.804744
0.672249	0.817853
0.621689	1.51822
0.529822	1.49496
0.647655	1.23247
0.82192	1.31453
1.69848	1.20058
1.80751	1.24284
0.932308	1.23515
0.629135	1.34629
0.384886	0.659041
1.25308	1.17757
0.469324	0.766508
0.582406	0.769774
0.410399	1.81644
1.41788	1.56321
0.211524	4.26768
1.28673	0.87404
1.19665	0.959651
1.39778	0.737719
0.577671	0.796174
0.684897	0.375038
0.356226	1.0015
2.31927	1.68397
0.155761	0.88074
0.481286	0.362858
1.66101	0.389258
1.07363	0.169481
1.2269	0.378477
1.12238	2.15121
1.84633	1.26936
0.403624	1.16463
0.277208	1.10157
0.172241	1.54101
1.02058	2.0051
1.3418	1.27245
1.88088	1.09551
0.843151	1.2436
0.345836	0.947704
0.190075	0.871824
-0.0126478	0.408549
-0.117615	0.787375
0.206773	1.17646
0.0817123	0.798679
0.457346	0.52342
0.976778	0.390247
1.42939	0.211557
1.64949	0.77059
0.500242	0.676992
1.12193	0.553202
0.490539	0.226826
0.839989	0.287614
0.389403	0.142377
1.15263	0.419736
1.10048	0.0798446
2.11633	0.300788
1.1172	0.675066
0.967526	0.396191
4.23332	0.486005
0.811313	0.233763
1.29891	0.143077
1.81021	0.57698
2.1626	0.614162
1.72512	0.377367
1.689	0.606003
0.873617	0.919321
1.38537	1.01665
1.62172	1.28882
0.0794693	0.740635
0.0638932	0.467297
0.039501	0.326432
0.162303	0.348811
-0.132958	0.591377
-0.00292831	0.731659
0.518529	0.20614
0.511535
0.246056	0.538856
2.05086	1.35017
0.908383	0.376771
0.825082	0.295043
0.858727	1.48154
0.387596	0.465259
0.686486	1.3637
0.827793	1.74181
1.51607	1.31291
0.412206	1.4066
1.43954	-0.0532703
0.58602	0.0417751
0.590989	0.0738308
0.647655	1.72828
1.08942	1.40073
0.601596	1.40501
0.701829	1.07204
0.774522	0.635692
2.19533	1.39735
0.730956	0.978367
0.268859	1.38696
0.428686	6.03993
0.596409	3.82677
0.396848	1.3847
0.267504	0.4411
2.08494	2.16689
0.830939	1.99443
0.512875	0.810192
0.71605	2.67707
0.342893	0.797326
0.224608	3.315
0.650583	1.15625
0.545382	2.8703
1.67454	2.35425
0.698885	1.53978
2.53529	1.57342
0.486909	2.79288
0.0709025	1.1278
0.25305	0.965719
0.840425	0.0726937
0.355307	0.994395
0.400914	3.68476
1.71878	0.741781
1.34473	1.08108
1.66168	0.482408
3.56353	1.29508
0.843805	0.37135
1.01989	0.567516
0.905658	2.7125
0.976544	2.78113
0.479246	1.09463
1.03704	0.463452
1.72871	0.609509
0.870456	2.21295
1.60636	0.584447
0.83569	0.372923
0.697981	0.331397
1.51291	1.19553
0.453499	0.453966
1.65963	1.14609
1.67521	0.771812
1.00544	2.09871
1.16821	0.542236
0.748775	0.807699
0.620334	0.833431
0.53884	0.137926
0.265464	0.151696
1.2323	0.643371
1.19777	1.54679
0.200901	0.683994
0.130247	1.27747
0.241757	0.805893
0.46705	2.40617
0.188035	2.8125
0.266367	1.37814
0.205636	0.698215
0.970221	0.538622
0.837496	4.08253
0.943585	0.152599
0.975423	0.793478
0.657795	1.02781
2.01563	1.25061
0.783089	0.845861
0.524167	0.462097
2.78925	3.08362
1.74812	0.459153
0.784662	2.89942
1.03773	0.472486
2.93079	1.64859
1.8294	0.273828
1.86597	0.598902
3.58995	0.630272
0.800238	0.430493
0.648325	0.81921
2.59082	2.22467
0.537703	1.26642
0.870456	1.53121
3.56624	2.51431
3.19332	0.662546
2.1793	1.18921
0.909053	7.96505
1.28649	1.13435
0.14559	1.9179
2.00321	0.743588
1.33525	0.822606
0.566379	0.310401
0.611752	0.0681767
1.82398	0.526878
2.01474	1.13458
0.420321	2.23416
1.43391	1.2786
1.55535	2.1301
1.3111	1.21087
1.3567	0.86368
1.33593	0.916062
0.497299	1.20726
0.551036	0.57384
1.05918	2.34003
0.1702	1.28808
0.182848	1.34473
0.632297	0.96075
0.590989	2.31791
0.761641	0.678573
1.09349	0.837496
0.934333	1.93053
0.870222	0.832528
0.23861	0.600023
0.318968	0.931857
0.58264	2.21904
0.251476	0.240417
0.337114	0.325961
0.362082	0.656455
0.127537	0.475414
0.20858	0.245604
0.251476	1.0208
0.25238	0.375634
0.546519	-0.0331927
0.25847	0.688277
0.325743	0.742233
0.178783	0.581285
0.621238	0.64901
0.146057	0.654197
0.547641	0.826204
0.826204	1.31403
0.940439	1.13254
0.523264	0.844272
0.730271	0.254856
	0.215589
4.50643	0.96008
-0.0719461	1.76575
1.46477	1.92173
-0.0129914	5.61891
0.0551786	2.24612
0.708798	4.97014
1.04777	3.87417
1.81707	2.14748
0.422093	3.57371
0.123176	0.670676
0.571316	1.9398
0.368944	2.05243
0.897187	1.5364
1.87454	1.90435
0.385819	0.885128
0.517626	1.29666
0.192358	0.78446
1.81932	1.62443
1.64642	0.287379
3.21672	0.984005
3.02421	0.736594
3.22928	0.348329
0.3801	0.056884
0.0935467	0.150341
0.104272	0.323033
0.136404	0.87611
0.0510348	1.53594
0.0649315	0.489183
0.107141	0.573388
0.204896	1.32849
0.260377	0.734788
0.151035	0.282862
0.510612	2.39308
0.481048	1.54724
0.520259	1.38741
0.413052	1.40976
1.0072	0.794615
0.323648	0.137942
0.27257	0.186695
0.62535	0.0993289
0.857135	0.187147
0.624422	1.60976
0.448679	1.219
0.25796	1.01111
0.673019	2.39558
5.33236	1.47071
1.61261	0.114905
1.33307	0.222583
1.37957	0.508155
1.3712	0.452393
1.27774	0.402051
4.26274	0.492797
1.12604	0.307021
0.233965	0.36593
0.0564517	0.874755
0.547104	0.638169
0.0560199	0.373609
0.0695503	0.372254
0.204616	0.436583
0.221426	0.00451707
0.419677	0.258486
0.248271	0.456676
0.202285	0.15126
0.302716	0.879038
0.178116	1.14519
0.190546	0.257349
0.252479	1.51168
0.164026	1.41833
1.52424	1.0576
0.23159	1.65175
0.10451	1.31201
0.796282	1.87298
0.447838	1.26235
0.423432	1.12284
1.69258	0.693713
0.478654	0.46909
1.04844	0.378126
2.94024	0.281507
0.423432	0.283984
0.769739	0.486707
6.33561	0.393468
0.849862	0.29618
3.70156	0.43501
0.490414	0.138845
0.354118	0.0643449
0.414671	0.794382
0.216505	0.713121
0.22024	0.217178
4.5525	1.36235
3.69597	0.0889552
0.319979	0.564354
7.89099	1.21224
0.497815	0.854661
0.500146	0.819895
5.72002	0.51289
6.32724	2.52085
0.943473	0.97047
0.723601	0.94586
0.56484	0.967074
0.490284	0.908165
1.1256	1.48199
0.533313	0.997557
3.86267	1.11584
0.943841	0.653979
0.428156	0.926
0.740626	0.644945
0.42095	0.694165
0.229777	0.182412
4.59072	0.454418
0.989093	0.335681
0.167434	0.493482
0.157443	0.574977
0.604806	0.80703
0.68627	0.787622
0.665229	0.355322
0.813242	0.877916
3.07224	0.873617
0.353643	0.75918
0.466742	1.07206
0.779794	1.16956
0.481393	1.91429
0.441666	1.3005
0.45375	0.264576
0.36821	0.306335
2.03317	0.232738
0.262038	1.02036
0.131333	0.724866
0.0834693	0.42124
0.0901161	1.3224
2.25065	2.01067
0.144538	2.19489
0.49283	0.592344
1.26326	0.946997
-0.0735214	0.530725
2.2885	0.269545
0.978411	1.25581
3.79379	0.714928
2.44851	0.598902
0.148164	0.410399
0.32367	0.426661
0.261219	0.382861
0.32846	0.197085
0.300149	0.73728
0.517302	0.254638
0.139899	0.19844
0.273627	0.486691
0.299888	0.733432
0.277294	0.453514
0.582471	0.316943
0.377099	-0.137257
0.304571	0.177879
0.318986	0.147864
0.30934	0.404294
0.272871	0.426427
0.299629	0.366817
0.15166	1.01131
0.0590619	0.274046
0.404485	0.266367
0.380272	1.22238
	0.129796
1.06035	0.00157319
0.890987	0.0282083
0.397778	1.45602
0.170153	0.143565
0.534731	1.38965
1.09931	0.190979
4.92654	1.18198
0.870257	0.632967
3.56004	0.392113
0.241946	0.692343
0.360508	1.33729
1.30415	2.10368
2.73827	0.968196
0.977325	0.737264
1.01529	1.07295
0.999501	0.499557
0.747931	0.611752
1.18501	0.872932
1.34921	0.472922
1.32933	0.274716
2.67923	0.332737
1.10099	1.03728
11.5136	1.22621
5.27926	0.708604
8.20361	2.44341
4.39214	1.7285
0.494553	3.1834
0.96689	0.863914
0.691335	3.26782
0.98408	0.836811
2.13968	2.00052
0.232141	1.9619
0.212266	0.416708
0.358901	0.581051
0.444345	0.107678
0.505681	0.588279
1.34825	0.463218
0.795109	0.211056
0.447782	0.204296
1.66124	0.919442
1.51922	0.860066
1.80132	1.10997
0.414846	2.27433
4.03639	0.609493
1.41925	0.678573
1.22938	3.80847
0.478786	-0.0625381
2.97047	1.4005
0.702687	1.62714
2.44528	-0.0422113
0.696382	0.930953
0.567241	1.69825
3.3703	3.06488
0.784612	0.174951
0.547771	0.283532
1.3691	0.0397191
0.600094	0.553295
0.0809672	0.221446
1.7347	2.93868
0.170032	0.477205
3.07888	0.664352
2.31658	0.307457
0.79279	0.115123
0.446359	0.154172
0.754991	0.734336
0.481919	0.81379
0.417308	0.875191
0.492864	0.262753
0.55719	0.191197
0.422068	0.258688
0.771815	0.144468
0.983428	0.0871328
0.219203	0.0977401
0.728748	0.282177
0.427012	0.851032
0.400626	1.33232
0.344214	0.0444698
0.251426	1.79102
0.771307	1.47229
0.385451	1.72241
1.26216	1.73572
0.554933	1.32194
1.45369	2.27209
0.306477	0.892356
0.61165	0.755332
0.467374	0.616051
0.357295	0.437938
1.311	1.15693
0.545594	0.815378
0.547629	0.621705
1.75319	1.17928
2.44695	0.958274
1.9113	1.65378
1.72034	1.66733
1.11503	0.823961
0.390922	0.639758
1.22169	0.846982
0.728911	4.14415
0.83132	0.555335
1.36666	0.484215
1.435	1.34475
0.400911	0.274513
0.339433	0.820581
0.420115	2.20053
0.274353	1.74823
0.269857	0.701377
0.0860318	0.645396
0.309079	0.461427
0.0461384	4.6198
0.133474	1.43526
0.327714	0.941794
0.209091	0.926
0.1528	0.694617
0.535951	1.97231
0.554261	1.29305
0.984181	0.0406381
0.516645	0.506115
2.23932	1.5513
0.938814	0.167506
1.02263	1.28064
0.0350309	1.78088
0.120515	0.284669
0.0604001	1.5777
1.43821	2.77345
1.72727	2.4143
0.154346	1.52286
0.257976	0.471582
5.00253	0.531395
0.465399	0.684009
0.800662	1.10207
0.242617	0.681066
0.37725	0.198658
0.401704	0.648792
2.12505	0.684228
2.89568	0.640209
1.92761	2.84773
0.575966	0.991918
0.449857	3.91978
0.968659	0.90072
0.534019	1.37771
3.61121	1.36394
0.150177	4.34732
2.87658	0.279249
0.214482	0.536597
3.21492	0.57722
0.424144	0.217396
10.1343	0.294825
1.16559	0.572033
0.752183	0.491442
0.451323	1.4066
0.722909	0.74541
0.178617	2.51227
0.225712	1.34881
3.72682	4.12203
-0.102897	1.70797
-0.101393	0.875424
-0.102612	0.62102
-0.0459756	0.725535
0.0735023	1.90321
-0.0913223	1.04541
-0.00457749	0.310619
0.151804	0.816282
0.231043	2.54478
-0.0746	3.49357
1.18583	0.576083
0.087173	1.77049
0.0244947	1.06301
1.50457	1.25308
1.63316	0.203611
0.406485	0.249218
1.86359	0.206555
1.14152	0.317394
1.26364	1.73865
0.141836	0.991451
5.66367	0.85421
1.15293	1.26121
0.125378	1.76868
-0.00805587	1.48831
0.015014	2.72898
1.23935	1.87703
1.29043	1.56912
1.01665	1.12486
0.234826	1.87477
1.29707	2.31475
0.0910585	1.24766
0.33402	0.2578
0.516483	0.215355
0.163603	0.274498
0.212774	0.838182
0.433094	0.583995
0.184822	0.384668
0.117545	0.250791
0.992807	0.474962
2.34049	0.607468
1.15104	0.269529
0.103874
0.565876	0.216982
0.492538	0.239209
0.0847109	0.361672
0.489853	0.298509
0.0868866	0.224988
0.282226	0.113335
0.100863	0.136038
-0.00319343	0.16545
-0.0178411	0.160444
0.354141	0.265989
1.28925	0.114867
3.1242	0.180125
0.112378	0.160207
0.0153594	0.383229
0.0121449	0.244236
2.14985	0.325268
0.0545621	0.182757
0.622107	0.195531
0.544964	0.171601
0.057552	0.0995458
0.040525	1.07021
-0.0140778	1.65143
0.0299874	0.4118
-0.0299046	0.357485
0.19414	0.593433
1.96307	0.537995
0.207444	0.465856
0.0703889	0.384328
0.513838	0.434458
0.105644	0.437695
0.131175	0.501332
0.0253285	0.262793
0.0110879	1.29833
0.0887185	0.761386
0.171882	1.40359
1.91248	0.706596
0.790104	0.0814621
0.230188	0.033922
0.244022	2.04681
0.186063	1.67193
0.389946	0.425676
0.219284	0.681953
0.634252	0.504828
0.422293	0.488083
1.25477	2.67721
0.378574	0.339703
0.357763	0.905278
0.409293	0.234503
2.26048	0.881174
1.0435	2.26849
0.00724313	-0.00794222
-0.0244526	1.76869
-0.0154408	0.114565
0.108188	-0.00209351
0.181099	2.07518
0.0158478	0.0969996
0.281819	0.0280956
0.42687	0.577303
0.0228257	-0.0687313
0.0894105	0.504808
0.18354	0.149696
0.0404436	0.232927
1.42134	0.211995
1.3675	0.174016
0.773626	0.174211
0.670952	0.265491
0.244551	0.415878
0.474962	0.221361
0.946912	0.310377
0.112318	0.15235
0.566203	0.381373
0.338599	0.242682
1.74208	0.204982
0.128389	0.266528
0.661838	0.264239
0.738696	0.395205
1.27463	0.173325
0.156443	0.106818
1.03526	0.117759
0.177539	0.193286
0.141449	0.200515
0.175688	0.205975
0.181241	0.296393
0.315021	0.932857
2.89979	0.351702
2.31974	0.762206
5.45873	1.09917
1.66364	0.357399
0.689871	0.579903
0.137869	0.917557
0.353693	0.35934
0.52106	0.42915
0.0985655	0.720083
0.369256	0.407656
0.79576	0.82701
0.310626	0.906185
2.88675	0.268512
0.294148	0.206169
1.27335	0.442486
0.223129	0.159343
2.03698	0.500363
4.18954	0.0130122
3.27528	1.40875
2.99398	0.337935
1.45204	0.0680836
0.384575	0.497017
0.343604	0.360399
2.82875	0.0598406
2.24361	-0.0851086
0.877582	-0.0156015
0.338171	0.6487
5.34011	1.48233
2.22003	0.368642
	0.608604
2.21463	2.70518
6.18365	2.58535
0.371453	-0.00207117
0.429572	0.69078
0.148705	0.118212
0.0992343	0.133533
0.409386	1.02675
1.84104	1.73816
0.307115	0.136252
2.18018	0.575912
0.542459	0.0901578
-0.0655524	0.451959
0.152799	0.207637
0.318957	0.441752
0.076169	0.885684
0.0388436	0.256471
0.148548	0.687089
4.46551	0.430272
0.864306	0.257485
3.86554	0.200083
0.708471	0.0703916
0.495428	0.763177
0.189517	-0.0281611
1.11118	0.0509276
5.3028	0.255068
2.86452	0.105998
0.037629	0.057357
1.16717	0.0609827
0.0588726	0.29991
0.207724	0.250385
4.34625	0.325892
1.08023	0.424748
0.348545	0.263657
0.133073	0.712769
0.597542	0.571143
0.386478	0.472116
0.100606	0.425569
0.186334	0.452975
0.492695	1.3925
0.356429	1.69055
0.297106	0.349954
[truncated: 2,333 more rows]

## Sheet: Fig. 4 J
norm EEA1 intensity at synaptophysin puncta
Pclowt/wt	Pclogt/gt
1.8941	0.352345
1.55119	0.595629
2.00473	0.460296
1.14436	0.57537
1.34065	0.569543
0.81042	0.761861
0.918371	0.738174
0.96148	0.633555
0.720788	0.519873
0.941407	0.335884
0.649001	0.81912
0.728	0.829198
0.588691	0.521532
0.535504	0.607099
0.73596	0.711073
0.990617	0.881645
0.900429	0.882015
0.828369	0.488048
0.75011	0.87036
0.705705	0.98636
1.07831	0.862682
0.934092	0.932618
1.23075	1.40614
1.32094	0.922999
0.725594	0.566122
0.733087	0.289533
0.461586	1.02623
0.965361	0.665654
0.712458	0.383889
1.12557	0.402852
0.482221	0.419779
0.967212	1.15731
0.873603	1.25656
0.510898	0.651127
0.947879	0.761758
0.834656	1.20809
0.947138	1.10846
1.37552	0.840298
0.802187	1.0007
0.858801	1.11235
0.930211	1.19856
1.55063	1.27432
0.941866	0.875543
0.909582	0.970448
1.52723	0.848066
1.84636	0.72689
0.864903	0.473336
0.723283	0.931226
0.722728	0.917905
1.46414	0.64835
1.13177	0.614956
1.0759	1.67874
1.17886	0.563524
0.943162	1.07285
1.28071	1.13067
1.24074	0.813561
1.21058	1.05204
1.28228	0.630313
1.11781	0.852693
0.804593	0.794042
1.14029	0.420979
1.55193	1.31614
1.82333	1.03973
0.90468	0.763424
0.783779	1.3005
1.00967	1.21058
0.87036	0.915225
0.800521	1.96366
0.833449	1.91629
0.707831	0.818928
0.502569	1.20587
0.979607	1.04436
1.29708	1.21752
0.628092	1.04454
1.18811	0.960459
0.968967	1.34851
0.980622	0.742891
0.619028	0.756212
0.903104	0.394063
0.783779	1.45619
0.828924	0.978133
0.942702	0.850938
1.76848	1.11827
1.08654	1.95062
0.817358	0.600901
0.743817	1.29773
0.715331	0.749836
0.723373	1.51798
0.635125	1.34879
1.65349	1.07119
1.2673	0.948989
0.745393	2.09233
0.584159	1.19218
0.817824	1.47765
0.703765	1.06758
1.18284	1.23511
0.577126	1.22049
0.601552	0.815878
0.951766	0.60886
1.23723	0.829109
0.557607	1.67329
0.666669	0.520243
1.24851	0.938815
1.19773	0.929841
0.819203	0.914305
0.714028	0.937985
0.872582	0.732443
0.776286	1.14075
0.935854	1.39902
0.878779	0.662048
0.615881	1.17711
0.531795	1.74008
1.05407	1.30254
0.498963	0.884147
0.827532	1.53657
0.621805	2.65716
1.40743	1.82722
0.42126	1.71973
0.461592	1.22271
0.80811	1.21586
1.33094	0.614318
0.668896	0.614962
0.635132	0.734198
1.43353	0.585825
1.14676	0.559739
1.44009	0.799231
1.1636	0.825777
2.03415	0.981739
0.840949	0.753442
1.01208	0.422466
0.707556	0.991639
2.07864	0.370013
0.892381	0.603678
1.85247	0.782209
0.476949	0.740121
1.78041	1.0069
1.2512	0.87989
1.72852	1.15102
2.38769	1.09089
0.671296	0.579621
0.657886	1.12502
0.994779	1.13612
0.858986	0.887198
1.19135	1.11179
1.35351	0.990336
1.1759	0.602752
0.616724	1.13584
1.60512	1.0191
1.05518	0.988671
0.64327	0.61172
1.57764	0.925028
0.79664	0.776471
1.14186	0.634296
1.05491	0.803304
0.631334	0.781934
	0.670926
0.41105	0.660477
0.634099	0.69248
0.482022	0.319417
0.629339	0.615058
1.97128	0.640959
2.10523	0.334033
0.791587	0.425798
1.53045	0.639108
1.60504	0.47723
0.964676	0.670741
1.6087	1.23917
1.56818	1.07461
2.05932	1.31299
2.20631	0.746868
1.07072	0.799314
0.445998	0.647891
0.4878	0.921978
0.883512	1.5399
0.786379	0.769437
0.43664	0.780632
0.878346	0.609128
0.652387	0.45752
0.617215	1.13594
0.348906	0.55021
0.456474	0.669164
0.631924	0.760744
0.527304	0.675643
0.434829	0.660841
0.481413	0.474262
0.572137	0.422459
0.432714	0.636791
0.64663	0.7391
0.431311	0.942051
0.33725	0.716256
0.456433	0.546693
0.870717	0.617554
0.569249	0.571483
1.0982	0.555022
2.15641	0.649652
2.20997	0.771109
2.99741	0.694236
0.962682	0.587025
1.24051	0.541516
1.9986	0.921518
0.942056	0.881281
0.946591	1.00385
2.93325
1.76696	1.23567
1.18374	0.802612
2.4295	0.824337
1.26201	1.40231
0.993033	0.502324
0.55739	0.564712
1.34554	0.47535
2.04188	0.450899
2.07606	0.463349
0.91195	0.357855
0.848422	0.65916
1.51804	0.688248
0.958533	0.444104
1.88031	0.604847
2.13448	0.499191
1.01744	0.777082
1.12751	0.774296
1.58437	0.367314
2.52781	0.362717
0.852613	0.511417
0.75481	0.343514
1.56603	1.14739
0.832963	0.476896
1.71948	0.602202
0.747526	0.772037
0.636846	1.07481
1.02725	0.79238
0.767747	0.509972
0.760199	0.247297
0.891466	0.367294
0.561215	0.683814
0.975967	0.53597
0.830257	0.473642
0.372482	0.284523
0.596081	0.228115
1.32436	0.194225
0.599112	0.518578
0.560685	0.449943
0.874745	0.34022
0.990715	0.644494
0.724398	0.316724
1.29855	0.350369
1.15933	0.342376
0.942748	0.257123
0.595674	0.336578
1.01071	0.40806
0.704401	0.489184
0.387311	0.473256
0.937093	0.530743
0.830521	0.589164
0.909876	0.603892
0.943886	0.432206
0.775821	0.440118
0.815835	0.703567
0.863618	0.775313
1.45199	0.435907
1.17235	0.682269
1.20402	0.282916
1.92724	0.319023
1.12762	0.640995
0.362616	1.30111
0.653404	1.34786
0.607431	0.382348
0.691931	0.43304
0.569555	0.479318
0.457959	0.336395
0.703934	0.522157
0.92448	0.517702
0.752856	0.580986
0.374089	0.957922
0.531495	0.37659
0.672932	0.320142
1.01266	0.347663
1.3061	0.491177
1.47687	0.523052
0.537049	0.8007
1.01458	0.896124
1.37945	0.703934
1.25504	0.555294
0.816322	0.510257
0.781782	1.05026
0.897182	1.00398
0.326652	0.598846
0.355516	0.508793
0.221442	0.724703
0.386925	0.639692
0.649009	0.496384
0.213061	0.34622
0.595938	0.190604
0.328421	0.668416
0.638981	0.309808
0.525433	0.598114
1.4921	0.429459
0.764532	0.351732
0.634221	0.556332
0.880949	1.04739
0.687354	1.62542
2.20979	1.35075
0.93335	1.9498
0.994885	1.01277
0.724051	0.991793
1.5385	0.626226
1.51576	0.895127
1.16409	0.96016
0.739572	0.961767
	0.813637
1.06696	0.546039
0.655337	0.518312
0.746807	1.14741
0.574784	0.321667
0.795439	0.302444
0.538985	0.292172
2.24677	0.312941
0.449286	0.60617
0.81989	0.63237
0.792122	0.299617
0.456242	0.600678
0.311056	0.501876
1.00984	0.613758
0.809952	0.521404
0.328416	0.894598
0.716895	0.62106
0.324075	1.36073
1.15167	0.905602
0.608338	0.852775
0.267277	1.10426
0.578471	1.05672
1.47584	1.15615
0.576136	0.820756
0.488585	0.770674
0.43333	0.307265
0.869362	0.430741
1.06267	0.538471
0.976424	0.487922
0.699673	1.14763
0.848034	0.527446
0.980459	0.935282
1.50122	1.76717
0.717967	0.98156
0.564003	0.872669
1.05152	0.953223
1.69247	0.382245
1.03793	0.915713
1.47518	0.550128
1.42651	0.695165
1.73028	0.380496
2.31612	0.943724
2.49181	1.15074
0.913839	0.272968
0.736306	1.0054
0.485085	0.828691
3.33492	0.446566
1.32504	0.681232
1.12913	0.52175
0.942261	1.06407
0.757215	0.36825
0.901425	0.497789
0.82946	0.343516
0.899886	0.0246148
1.61594	0.119713
1.63624	0.0597861
1.02132	0.11593
1.53389	0.193147
1.64067	0.268738
0.922521	0.404541
0.664296	0.681294
1.90496	0.426084
2.20033	0.511581
1.79715	0.121279
1.24557	0.228359
0.701025	0.145913
0.544868	0.311964
0.3132	0.286374
0.550001	0.228217
0.826378	0.380721
3.67887	0.248762
0.453067	0.181511
0.474256	0.105677
0.68931	0.541991
0.335413	0.520958
0.34993	0.319186
0.375176	0.204946
0.601805	0.339385
0.397766	0.304134
0.607359	0.524741
	0.720106
	0.196443
	0.570491
	0.246932
	0.861726
	0.741586
	0.567826
	0.719536
	0.526674
	0.725373
	0.397502
	0.443068
	0.875802
	0.657737
	0.540608
	0.485562
	0.557349
	0.323795
	0.455404
	0.434869
	0.529608
	0.459697
	0.694959
	0.676896
	0.546082
	0.482892
	0.351891
	0.478458
	1.0951
	0.440656
	0.636154
	0.432209
	0.554155
	0.365004
	0.473792
	0.376532
	0.815832
	0.400519
	0.688705
	0.738409
	0.910339
	0.581131
	0.848923
	0.542021
	0.914911
	0.424648
	0.779756
	0.733134
	1.2017
	0.645535
	0.556583
	0.994579
	0.588412
	0.920373
	0.768511
	0.289306
	1.07928
	0.650343
	0.574784
	0.622108
	1.07998
	0.755302
	0.425676
	0.609739
	0.743539
	0.510425
	0.557607
	0.716006
	0.980201
	0.555369
	0.718057
	0.466089
	0.558122
	1.00998
	0.694443
	0.460489
	0.598259
	0.50515
	0.336582
	0.733971
	0.413819
	0.515046
	0.462824
	0.473415
	0.337703
	0.765571
	0.433282
	0.414241
	0.959576
	0.614592
	0.664995
	0.894518
	1.27973
	0.745641
	0.537262
	0.436734
	0.963353
	1.50412
	0.716379
	0.538943
	0.76655
	0.167544
	0.399679
	0.730893
	0.315393
	1.02421
	0.524568
	0.465902
	0.413493
	0.888496
	0.39254
	0.511359
	0.714325
	0.712647
	1.65981
	0.624581
	0.574504
	0.624858
	0.588737
	0.882803
	0.768837
	1.17706
	0.596343
	0.776536
	0.95612
	0.741581
	0.990702
	0.817558
	0.715397
	0.84094
	1.19614
	0.734673
	0.32202
	0.694959
	0.463336
	0.834406
	0.430387
	0.224013
