# Supplementary material for: Critical role for Piccolo in synaptic vesicle retrieval
Source: eLife. 2019 May 10;8:e46629. doi: 10.7554/eLife.46629 (PMC6541439; doi:10.7554/eLife.46629)
Supplement: Figure 5—source data 1. [file elife-46629-fig5-data1.xlsx]

## Sheet: Fig. 5 C
norm Rab5 intensity at PI3P positive organelles
Pclowt/wt	Pclogt/gt
0.116015	0.664583
0.578946	0.838153
0.261502	1.92585
0.39398	0.0711274
0.938062	3.36044
4.6773	0.132129
1.03406	0.275432
0.894207	0.456022
0.479276	1.29383
1.03923	0.0944923
0.854037	0.024858
1.54463	0.0203709
0.840798	0.86969
0.789469	0.544645
0.966144	1.78197
0.787968	0.197737
0.410785	5.70595
0.864393	4.34477
0.127872	2.60885
0.454529	3.0529
0.403423	1.7311
0.362904	2.16571
0.402502	1.18875
0.528531	1.46118
0.44152	1.12038
0.312608	0.463043
0.563753	1.73835
1.42055	1.20405
0.0272724	1.69208
0.148013	1.59701
0.601851	0.721789
0.336664	1.09126
1.39052	1.15422
0.581138	1.09126
1.63649	0.527618
1.53071	1.48904
0.928277	0.989851
0.792575	0.421491
0.252988	1.90167
0.0471906	1.3325
0.0229043	1.18115
0.104737	0.453489
0.117055	1.08372
0.812834	0.847707
2.16042	0.81594
0.817663	0.132018
-0.0528293	0.146869
1.55177	0.285796
2.3966	0.261391
1.07249	0.172188
1.6305	0.269682
1.61139	0.182782
1.3683	0.0306159
0.603233	0.14756
0.693817	1.07296
0.373728	0.514728
1.57364	1.74756
2.23753	1.75653
0.785784	0.0156534
2.21025	0.138006
2.1496	2.84008
0.208561	0.565143
1.09977	0.0866696
1.26253	1.24193
0.362221	0.818703
1.71199	1.39697
0.188651	0.466386
1.31754	1.62417
1.10311	0.0279713
1.47051	0.761387
1.6579	0.901346
2.44897	0.671143
0.469722	0.983759
2.78472	1.80096
1.63798	2.79266
0.61636	0.355661
1.41952	0.332637
5.47805	1.36059
1.00828	2.26366
0.953945	3.90993
1.4315	1.46786
2.23938	1.66089
1.56121	0.798563
1.52346	0.658373
0.963849	0.852774
2.25595	3.60607
1.36623	2.97463
2.35102	4.41637
1.0816	0.343803
1.71867	1.18495
1.87935	0.403423
1.34989	0.886956
0.934035	1.37843
5.6057	0.810761
0.1677	0.556852
0.623961	1.02634
-0.366247	0.927586
0.0667593	0.938411
-0.0115078	1.73237
3.23154	1.03969
0.521288	0.838614
0.339197	2.79116
0.0926578	1.39869
0.88339	0.348179
0.403542	1.04891
0.86946	0.792924
0.319517	0.0843665
0.430243	1.08619
0.324926	0.580447
0.278545	0.635349
0.280157	1.07802
0.273939	0.134202
0.642489	0.423564
-0.249303	0.669881
1.41642	0.0905849
-0.0178374	0.403082
0.331486	0.243204
-0.293849	0.415622
-0.039479	0.210404
0.201771	0.24148
-0.0814915	0.210404
-0.00932375	0.499416
0.110384	0.189914
-0.190946	0.0191081
-0.111988	-0.0179566
0.0378668	0.224556
0.88316	0.0524878
0.607497	1.76045
1.09529	1.77265
0.331255	1.51218
0.993996	1.35599
0.481118	1.55545
0.707398	0.496541
0.625795	0.417004
0.643633	0.518866
0.292007	2.12727
0.0340706	1.34505
0.271747	0.626375
0.593909	1.28048
0.462701	1.36439
0.374531	1.30419
1.52921	1.76942
1.70704	0.439217
1.63315	0.26726
0.967065	0.610952
1.54889	0.457174
2.40477	1.08654
0.241361	0.627638
0.71592	0.383973
1.96912	0.343224
1.24181	0.366819
0.985133	1.25781
0.285558	0.431625
0.968098	1.02542
0.491475	0.511385
-0.03361	1.36151
0.835048	0.524163
0.359457	1.71706
0.0977167	1.27507
0.74976	1.46453
1.19727	1.55499
1.82778	0.0842553
0.722821	0.09427
0.600707	0.050415
1.07295	0.196244
1.15341	0.469833
1.21108	0.938633
3.2313	0.0559346
2.36276	0.0788469
1.40053	1.03278
0.807656	0.00736211
0.117055	0.0147322
0.295922	-0.0064488
0.225366	1.45739
0.161482	1.37498
0.399738	0.797411
0.535099	0.0418934
0.353588	1.19864
1.36531	0.106699
3.16074	0.0675615
0.502061	0.363253
1.11922	0.749871
1.03394	0.942549
1.6503	0.680348
1.571	1.22132
2.03381	0.233539
2.25514	-0.0216416
0.963841	1.59931
0.901346	0.986054
1.02922	1.04123
1.30108	0.277575
0.358305	0.626632
0.635921	1.06914
2.73707	3.39795
0.638804	1.44308
9.01989	1.08157
1.41918	0.467938
0.590692	1.18973
1.20855	1.92885
0.810563	0.976357
0.209655	0.553985
2.80728	0.661027
0.586355	0.545338
0.865764	0.576017
0.484826	1.2294
1.92383	0.348676
1.88626	1.04088
1.36005	0.37789
0.314829	0.286937
1.50377	0.539478
0.539205	0.600444
1.30693	1.05912
1.18886	0.824951
1.15733	1.3792
0.613425	1.13038
0.485338	0.8464
0.752255	0.775884
3.16972	1.4498
2.12718	0.85906
0.166793	0.826558
0.795558	0.693231
0.702402	3.7146
0.657943	0.00755114
0.866336	0.491067
0.774966	0.45217
0.550305	0.0982183
1.44813	0.147036
0.29357	0.469391
0.389299	0.141795
0.842255	0.233332
0.555295	0.440773
2.73427	0.469617
1.78331	0.244956
1.16886	0.102267
1.60989	0.04609
0.530928	1.46258
0.535584	0.508025
1.90228	0.107281
2.47149	0.258544
1.53862	0.154133
0.768834	0.188409
0.762724	0.252685
0.636756	0.0524381
1.05702	0.470547
0.167842	0.138734
0.138985	0.241361
0.41431	0.257271
0.454623	0.17064
1.48229	0.25078
0.719575	0.919358
2.41055	0.213157
0.291332	-0.107814
0.0838079	-0.092559
1.26272	0.189367
0.821163	-0.0434207
0.494794	0.185894
0.304122	0.495053
0.319783	0.178847
2.10946	0.0331739
1.39413	0.023045
0.618486	-0.00230596
1.23582	0.627666
0.855308	0.299415
0.811743	0.2473
0.382213	0.108579
0.381558	0.0216934
-0.0892309	-0.0218221
0.184794	-0.0343409
0.00586874	0.169539
0.236618	1.22182
1.15346	0.62441
0.258893	0.810187
0.200658	1.24086
1.07316	0.426544
0.829898	0.229974
1.24992	0.648728
0.543058	0.879255
0.879908	1.01132
1.02842	1.11322
1.00277	0.726256
1.53167	1.29626
0.525837	0.582039
0.690289	0.758502
0.284316	1.06154
0.262684	1.13988
1.57514	0.82757
2.34915	1.04109
0.726406	0.601806
0.94008	0.356829
2.0825	0.205639
4.12039	1.10663
1.05972	0.376362
1.74071	0.705494
1.55656	0.521761
1.43069	0.509996
0.459367	0.225836
0.333326	0.0648852
0.822265	0.261204
1.86316	0.447043
1.31725	0.608797
2.17461	0.867523
1.33898	0.776885
1.50641	0.406872
0.729527	0.521298
1.90951	0.397999
0.674018	0.341574
0.566757	0.110874
1.60681	0.40279
1.36282	0.808814
0.493423	0.623707
0.955888	0.169561
1.76002	0.406252
1.69556	1.49478
0.486862	0.212474
1.347	0.47881
0.668584	0.385162
0.630447	0.301504
1.41405	0.255029
1.49955	0.00125104
1.02497	1.05046
0.877507	0.122109
1.23883	0.25619
0.670478	0.508617
0.629291	0.719036
0.148348	0.503061
0.156395	0.307736
0.449969	0.451421
0.391969	0.437785
0.863531	0.742985
1.44872	1.6828
0.962455	0.394694
1.00005	0.40915
1.25687	0.223541
2.22224	0.267821
1.26544	0.272596
0.933463	0.492803
0.56038	0.344332
0.0247869	1.28039
-0.00659463	0.61365
1.53258	0.527222
0.9768	0.872158
0.732749	0.862525
0.732772	0.272523
0.704433	1.12294
1.05812	0.838802
0.505037	0.330798
1.9435	0.399785
0.942844	0.183453
0.597373	0.456901
0.769509	0.360223
0.457658	0.785508
1.3325	0.622334
1.85944	1.32004
1.11877	0.792555
0.750227	0.938242
0.816062	0.884016
0.0280601	0.491345
0.959385	1.42171
0.251841	0.372856
0.482701	0.445101
0.704787	0.414113
0.553051	0.112073
0.519804	0.238543
0.535032	0.452581
0.194923	0.5851
0.56462	0.673669
0.664759	0.468339
0.198579	0.249978
0.135878	0.269328
0.245923	0.877901
0.283292	1.04802
0.952038	2.85628
0.0402939	2.64999
0.0571158	0.603088
0.614755	1.06132
0.630847	0.761439
0.576223	0.809547
0.894688	0.535995
0.90413	2.37182
0.476253	0.644079
0.303105	0.691188
0.8908	0.910115
1.35548	0.610036
1.08233	0.86018
0.322854	0.325914
0.336088	0.298285
0.515983	1.06095
1.12073	0.746244
1.13213	0.821647
0.442208	1.45592
1.28487	0.634605
0.518607	0.685371
0.401182	1.24075
0.758478	0.44397
0.769085	0.679686
1.26372	1.09769
0.945257	0.511161
0.735471	0.265339
1.1454	0.850804
0.725665	0.675796
0.542909	0.267465
2.01053	0.537358
0.436955	0.552852
0.708143	0.18076
0.768553	0.239339
0.911212	0.385191
0.468738	0.632042
1.19171	0.214403
0.023768	0.782881
1.69672	0.311882
-0.00904291	1.7558
0.0199462	0.672868
0.982725	0.660669
0.546967	0.404075
0.503914	0.499989
0.563624	0.476285
0.5471	1.15278
0.50418	1.12389
0.731817	1.35565
0.713598	1.06042
0.870188	0.444467
1.40791	0.842725
1.19826	0.790926
0.672306	0.928999
0.00890986	1.1835
0.41435	0.829293
0.471566	1.22416
0.573199	0.670077
0.641886	0.911611
0.417373	0.435358
0.455242	0.502384
0.630948	0.756551
1.18234	0.25995
0.44703	0.278204
0.801369	0.422459
0.944658	0.516811
0.418339	0.540083
0.921188	0.366272
0.775768	0.371326
0.731751	1.11764
1.60373	0.952703
2.78354	0.968096
2.16037	1.46662
0.664858	0.958755
0.567547	0.825004
1.01065	1.98729
1.06232	2.45154
0.615055	1.28493
0.452182	1.02987
0.23688	1.07967
0.589388	1.99753
0.546667	0.739195
6.38327	0.868057
0.406568	0.550989
2.53885	1.02551
4.03127	0.210315
1.24125	0.906259
1.49202	0.358229
1.67199	0.434463
1.19922	0.27621
1.33008	0.210017
0.822145	0.361686
1.1582	0.680982
1.578	0.389313
0.95277	0.317802
1.52743	0.355435
2.26373	1.33613
1.57816	0.863839
1.29175	0.289942
0.825203	0.533768
0.0300214	0.154464
-0.0125688	0.556543
0.592115	0.336221
2.06203	1.16724
1.8698	1.78323
1.80364	-0.000332629
0.546302	0.897416
0.952903	-0.108283
1.71697	0.0465451
1.61267	0.84389
1.43657	0.146815
0.889403	0.369367
1.34567	0.668083
1.17213	-0.0981094
0.707978	0.13415
1.98623	0.214573
0.845817	0.575427
1.63289	0.86786
0.641285	0.554216
1.14493	0.451551
1.53079	1.246
1.59775	0.98133
2.41015	0.501255
2.8359	0.642317
1.76773	0.24692
1.14217	0.18106
0.668514	0.660006
0.749169	0.540152
1.25418	1.66178
3.71098	0.152502
3.01746	1.81159
2.89704	2.37551
2.82892	0.80007
3.14676	0.722575
3.35966	1.16621
3.23313	1.90268
1.37673	2.58659
0.492676	3.67969
0.135875	2.38289
0.180126	0.872083
0.512156	0.455772
0.300646	1.61184
0.819918	0.253536
0.393834	1.04284
0.833381	1.26093
0.0402595	1.04483
0.366339	0.716624
0.168026	1.36001
0.110343	1.02053
0.608405	1.10517
0.506905	1.41789
0.434328	0.572369
0.539985	1.02738
0.623832	0.793888
0.112869	1.28031
0.730386	0.514319
1.296	0.625929
5.92365	0.845053
1.62172	1.8207
0.942763	0.613294
1.16611	2.44573
0.380371	1.22113
0.819087	0.667053
0.844787	1.13599
0.688396	1.13988
0.412154	0.476918
0.531208	1.56254
0.670808	1.78017
0.675296	0.902602
0.693583	0.631611
0.905227	0.477682
0.669978	0.721609
0.911576	0.880759
0.50501	0.940701
0.466146	1.36815
0.458699	1.45293
0.985319	2.28834
0.502384	1.54625
0.620873	0.431369
0.914338	1.69057
1.33633	0.771712
1.26588	0.286781
1.58518	0.59697
2.51907	0.55006
1.4773	1.06378
1.21296	0.459828
0.798575	0.947817
0.873645	0.833117
1.01634	0.734111
1.15102	0.521135
1.10873	0.391508
1.02339	0.276942
0.98339	0.28236
0.428676	0.463354
0.504478	0.439083
0.491412	1.08456
0.195787	0.589489
0.100039	0.7385
1.26605	0.99792
0.895287	1.62601
0.730585	0.649899
0.26444	0.648667
0.860345	0.797478
0.776066	1.34398
0.337416	0.627225
1.22934	0.647865
2.26227	0.412965
1.13163	0.34211
0.77251	0.186147
1.62408	0.266368
0.997122	0.237305
2.03114	0.204684
1.33387	0.112051
1.28071	1.29008
1.3717	0.313864
0.865899	0.0746337
0.884615	0.229566
0.427347	0.589928
1.18018	0.284717
1.39275	0.181895
1.04067	0.14547
1.31666	0.0746467
0.551408	0.127023
1.70633	0.320163
1.07897	0.176392
0.665113	0.309709
0.790236	0.157914
0.892209	0.0801041
0.780015	1.23344
0.300311	0.0704853
0.67276	0.168932
0.487968	0.0720993
0.402951	0.193568
1.21695	0.213583
0.836216	0.13403
0.754323	0.0985242
0.693404	0.598522
0.596396	0.355209
1.00393	0.151568
0.232521	0.144685
0.984459	0.16013
0.755729	0.132118
0.822767	0.10006
3.03653	0.29558
1.72599	0.0677828
0.623171	0.081342
0.23632	0.098479
0.743188	0.091129
1.30031	0.141911
0.828969	0.0814914
0.664496	0.157849
0.714248	1.14195
0.533021	0.0988225
2.29861	0.0334829
1.03151	0.0185887
0.905872	0.716795
0.208216	0.00356479
0.816732	0.0900011
0.574664	0.074653
0.256464	0.116705
0.264611	0.094713
0.537311	0.0443914
2.05995	0.0489218
1.51368	0.0908633
4.3599	0.0721839
2.90308	0.452716
4.50262	0.113995
1.28526	0.479957
0.915659	1.00547
2.81517	0.3499
2.01672	0.360627
1.68656	0.699133
0.0911679	0.386287
0.425208	0.73285
2.72452	0.795059
1.69421	1.74939
0.789388	0.818392
0.822929	1.23736
1.45547	0.808819
1.14334	0.851882
0.360154	1.1927
0.623067	3.0525
0.522015	0.650659
0.699743	1.27163
1.22788	0.839746
1.24841	1.49902
0.72143	0.464281
1.53012	0.619788
2.26902	0.453521
0.446377	0.339035
0.454867	0.858643
0.273698	1.06702
0.414702	1.18599
0.1745	1.09903
0.146487	4.10013
0.503277	1.03513
0.246794	0.929599
0.225612	1.58827
0.0438467	1.15103
0.122201	1.28616
0.786037	1.66059
0.601866	1.6802
0.488033	1.89508
0.542373	0.96783
0.431813	1.68495
0.733952	1.30577
0.860962	1.8752
0.696463	0.485583
0.50515	0.491643
0.683967	1.18916
1.82088	1.15108
3.05338	0.915888
1.03708	0.559045
1.65769	2.03731
3.03112	1.82533
2.39676	1.43348
1.62677	1.56506
1.50617	0.931996
0.0817181	1.86514
0.141062	0.665994
0.614227	1.42015
0.0417859	2.52775
0.0908437	1.02081
0.124068	0.879726
0.144938	1.73891
0.666047	0.30014
1.45893	0.994649
0.676807	1.89508
1.26939	1.47067
0.412007	0.845859
0.370874	0.791131
0.554021	0.659821
0.516224	0.784411
0.408562	1.03512
0.249072	0.392126
0.181723	0.677138
0.699638	1.11842
0.257209	0.479138
0.418889	1.15218
1.70931	1.58341
0.338978	0.800365
0.395236	0.895347
0.993063	0.527368
1.72143	0.980505
0.791459	1.14732
1.42075	1.92692
1.28305	2.57588
1.55998	1.21068
1.23274	1.39961
1.02611	1.3924
0.549815	1.05987
0.714605	1.42419
1.02289	0.874046
0.41523	1.72045
0.345148	0.45106
0.254643	1.56484
0.509451	0.392017
0.911569	1.27753
0.915722	1.07265
0.140431	1.43244
1.20341	0.863885
0.254914	1.27731
0.290364	1.48373
0.959964	1.43331
1.93937	1.32642
0.45827	1.50137
1.03845	1.81451
1.05156	2.432
0.705812	0.493339
1.16955	0.656707
1.20275	1.78196
1.02442	0.963515
1.18943	1.47084
1.05058	1.1128
1.29949	2.89011
0.587504	1.14814
0.163482	1.6755
1.21073	0.874758
1.01819	2.02622
0.358806	0.75743
1.1093	0.305824
0.761252	4.7612
0.832423	0.974093
0.274689	4.5082
0.509232	0.617672
0.821335	0.912668
1.21887	3.18622
1.17277	0.775334
0.783318	0.725083
1.0426	2.69011
0.599466	1.51877
1.59138	1.14046
0.807733	2.21932
0.675062	1.4592
1.68375	1.19088
0.490878	0.43104
0.936477	2.52049
0.29495	1.51535
1.02474	0.707285
0.389447	1.00604
0.33155	1.42355
0.470066	0.601447
0.861537	2.14363
0.564563	0.479552
1.20439	1.47262
0.477005	1.2016
0.934619	0.699029
0.913698	1.05135
0.664792	1.82494
1.17604	1.4016
1.18003	0.37304
1.27682	0.886165
0.671402	0.695829
0.737655	1.92848
0.62552	1.29222
0.140921	0.898857
0.305221	1.20323
0.186912	1.19424
0.968101	3.70856
0.449202	1.61961
1.39922	0.82115
0.550524	1.04927
0.69997	0.415319
1.02584	0.699816
1.76065	0.37349
1.1956	2.3859
1.06751	1.75858
0.630819	0.594765
0.76819	1.64932
0.846024	1.13849
1.79916	1.20126
0.960673	3.87307
1.11809	1.50491
1.33767	1.32265
1.02147	1.11917
0.024799	1.30979
1.48831	1.04461
0.884863	0.846808
1.46264	1.12928
0.656655	1.14309
0.831552	0.307687
1.83385	1.31356
0.398078	1.16825
1.86722	0.412064
0.794026	0.373772
1.42932	0.559955
0.719466	0.501506
1.9467	0.683645
2.08226	3.23305
0.939209	0.46557
0.994702	0.453444
1.52819	0.480675
-0.120822	0.585726
0.924077	0.729519
0.154248	2.02202
0.788127	1.93999
0.469576	0.0908484
1.5343	0.464334
0.96417	2.91644
0.668451	0.630306
1.07303	0.131496
0.880381	4.16447
0.518082	1.74651
0.418233	0.836309
1.1743	2.14868
0.591107	1.00149
1.68118	0.670787
0.3889	0.811549
0.530534	0.720534
1.08619	2.98157
0.601543	0.721712
1.87744	0.848435
1.22613	0.72497
1.46237	1.0363
2.1028	0.855904
1.05844	1.36454
1.52808	1.48132
0.735473	0.620872
1.7322	0.593529
1.13153	1.21114
2.4681	0.74844
0.237057	0.436599
0.493064	0.130151
2.90109	0.61133
1.5531	0.366528
0.685332	0.809244
0.177517	0.121783
0.394527	0.572364
0.317349	0.180906
0.85236	0.839342
1.34799	1.1605
1.1885	1.03063
0.737493	0.858655
2.01951	0.384945
0.819808	1.957
2.60614	1.2217
1.26104	1.44893
0.742027	1.6451
2.89541	1.2683
1.47526	0.396231
0.654032	1.53579
0.706633	1.45078
1.72728	0.36473
1.1011	0.353615
0.00628268	1.41125
0.761255	1.27268
0.68604	0.879765
0.864326	0.761186
0.910645	1.1034
0.638086	1.34736
0.427848	1.688
0.370113	1.06629
0.622626	1.75189
0.350232	1.02479
0.27562	1.65858
0.360611	1.05337
0.974003	0.825698
0.769886	0.928897
0.626451	0.345305
0.316037	1.14781
0.863832	11.145
0.246234	0.838723
0.971	0.66742
0.867002	0.724633
0.281628	0.480451
0.496561	0.310101
0.599794	0.505493
0.590835	1.18537
0.727279	1.40115
1.24569	0.506446
1.42124	0.354344
1.24481	0.429134
1.40606	0.727609
0.52196	0.377476
0.463516	0.687407
0.132076	1.37111
0.653598	0.447156
0.533813	0.315323
0.0632527	1.34275
0.96532	0.94585
0.738258	1.48694
1.05708	0.844561
1.19358	3.65595
0.421674	1.09015
0.499784	1.1742
1.3952	0.6476
0.951937	0.85568
1.12334	3.18695
1.02982	1.02614
0.549544	10.0735
1.64005	1.23776
1.20139	0.134246
0.896497	0.706049
0.867107	0.33705
0.788836	0.326326
0.757977	3.25983
0.955977	0.449062
2.54163	1.19754
0.440846	0.553215
1.1335	0.913567
0.955103	1.20306
0.722474	0.910479
0.335756	1.08745
0.481429	0.653605
0.745743	0.781285
0.839033	1.08139
1.47963	1.19335
0.609955	1.59288
0.814125	0.960448
1.13841	1.92977
2.36903	0.433116
1.32287	0.64361
0.36536	0.598918
0.766826	0.508015
1.08226	1.26022
1.26142	0.77786
0.726514	0.536711
2.24067	0.567254
1.8794	2.24857
2.99356	0.995598
2.00945	0.752031
1.66818	1.10632
3.51044	0.845909
3.00143	1.80776
0.52245	0.95478
1.97504	0.973701
2.49482	1.04237
2.16791	0.699928
2.48515	2.29579
0.839964	1.134
1.66185	0.395499
0.574667	1.23018
1.17719	2.152
0.857222	1.0285
0.95756	1.59379
0.828767	0.53699
1.05184	1.80512
1.63688	0.519583
1.5886	1.35415
0.658893	0.456756
1.25464	0.642095
0.364866	0.366137
0.972526	0.409593
0.948055	1.01991
1.15922	0.918565
2.05293	0.870053
1.7807	1.12165
0.510759	1.05842
1.02393	1.10666
0.425715	0.6636
0.778513	0.732157
0.374699	0.727101
1.22395	0.698018
1.28698	0.498248
0.884531	0.866461
1.48007	2.08324
1.43697	1.32689
0.961713	1.34345
1.20926	0.839716
1.12634	1.04022
0.821335	1.28515
0.374262	0.770617
1.31609	1.05538
0.97034	0.895102
0.312596	0.831146
1.81385	0.2008
0.656436	1.31732
1.83975	2.3791
1.19063	1.14191
1.14131	1.34764
1.00213	0.215963
1.87525	0.503302
1.15453	2.63443
0.978319	0.140109
0.811833	0.162704
0.850996	0.120451
0.585921	0.167388
1.04234	0.152049
1.70713	0.213459
2.57216	0.115415
1.85542	0.150939
1.67408	0.210521
1.04938	0.200503
1.07161	0.140298
2.52557	0.164952
1.36099	0.226903
0.918345	0.193003
0.863177	0.125163
1.33718	0.826354
1.13355	0.244842
0.745358	0.793591
1.8404	0.655581
0.262075	0.262589
0.656764	0.399611
0.541897	0.145889
2.32036	0.226821
0.390164	0.242174
0.978416	0.240482
0.695267	0.296043
0.00628772	0.536213
0.395611	0.288272
0.405885	0.264702
0.66809	0.523149
1.99226	0.483982
0.682858	1.26026
0.799532	0.621234
1.21221	0.609943
1.06482	0.487963
0.464559	0.700543
0.69942	0.648948
0.56467	0.433281
0.167316	0.785198
1.10587	0.285213
0.905086	0.408642
0.704585	0.353635
0.681623	0.769384
0.975832	0.218346
0.0885433	0.466816
0.617897	0.408439
1.00665	0.0694388
0.0841074	0.242986
0.26518	0.132365
0.415261	-0.0237189
0.120489	0.517193
0.726822	0.547952
0.529633	0.711576
0.26114	0.653646
0.676176	1.01833
0.47882	0.979216
1.05848	0.703304
0.588027	0.969915
1.61579	1.36128
0.503242	1.61343
0.994529	0.940902
0.835972	0.574176
0.966007	0.775748
0.781509	0.816864
1.1922	0.772418
0.324249	0.920649
0.762026	1.3172
0.0592355	1.55571
1.12636	0.655635
0.586846	0.384151
0.713177	0.118535
0.586958	0.0365865
0.55636	0.0471892
0.55254	0.184888
0.712953	0.0640591
0.880943	0.228627
0.180624	0.162022
0.359674	0.107848
0.220992	0.183515
0.666068	0.127598
0.159792	0.090845
0.322169	0.414637
0.245643	0.063154
0.510541	0.350327
0.147159	0.0420965
0.367481	0.183849
0.247212	0.0463848
0.0599638	0.363008
0.275625	0.144181
0.254008	0.0719987
0.157604	0.140529
1.7264	0.326774
1.85363	0.318967
1.63107	0.139674
1.366	0.0936919
1.49867	0.0415775
1.04192	0.382439
2.21814	0.83232
1.91641	1.27296
1.43938	0.24454
2.44587	1.39127
1.58323	0.256551
0.841361	0.469547
1.01373	1.57604
1.51057	0.810159
1.08824	1.38213
1.57486	0.049568
1.36285	0.0545267
2.05088	0.241759
2.31965	0.0997729
2.66012	0.0400703
2.66787	0.10041
3.74381	0.0655998
1.88962	0.138988
1.89029	0.0892361
2.47141	0.102503
1.49171	0.308481
0.991383	0.161939
1.71579	0.216381
1.19436	0.12944
1.13731	0.105485
1.8264	0.231088
0.429184	0.0771411
1.3245	0.239398
2.03925	0.0872919
2.63126	0.180197
1.66852	0.0991857
3.88081	0.0944455
1.35106	0.0566199
0.924961	0.163294
0.77898	0.189544
1.60956	0.348183
1.40491	0.617483
0.459112	0.482749
0.502963	0.37976
0.553552	0.252783
0.742319	0.817631
0.951072	0.684271
0.420429	0.30741
0.28051	0.0710542
0.983131	0.796862
0.499484	0.675312
1.21339	0.276748
0.465345	1.72811
1.09688	0.547935
1.37363	0.99562
1.64735	0.628863
0.700714	0.502722
0.718117	1.03484
0.46175	0.821896
1.20188	0.635396
0.38629	0.21881
1.25258	0.0356276
0.902843	0.450333
0.325989	0.473059
0.556864	1.63765
0.422002	1.14803
0.54165	0.619202
0.317904	0.417745
0.188879	0.363364
1.42563	1.99887
1.63966	0.609466
0.923055	0.558793
0.684373	0.335178
0.526266	0.548225
1.01132	0.7871
0.943886	0.593172
1.55527	0.592037
0.381854	0.666445
0.504648	0.70167
1.26471	0.690016
0.929625	1.39
0.802898	0.682235
1.04731	1.34657
0.615762	1.74224
1.00284	0.485167
0.620872	1.37809
0.52312	1.92421
1.3089	0.883087
0.559785	0.968984
0.433453	0.649509
1.2176	0.720877
0.600661	0.0654919
0.221108	0.042463
1.55134	-0.0535885
0.303306	0.347486
0.320034	1.04628
0.162768	-0.277165
0.317396	-0.416611
0.425593	-0.396369
0.429916	1.63192
0.131325	0.453487
0.355351	0.442603
0.157828	0.576979
0.498415	0.372382
0.712445	1.5798
0.485952	0.628459
0.523399	1.08267
0.791671	3.42419
0.59712	1.07796
0.748382	1.26373
0.799644	0.961139
0.847087	0.988683
0.600769	1.02328
0.505489	0.945589
0.39864	1.5017
0.526375	1.30185
0.589484	1.32428
0.617165	2.12954
0.488083	2.93568
0.794027	2.35295
0.205271	1.51095
0.53508	2.9171
0.420762	3.32403
1.80501	2.59572
2.7165	2.96533
1.73011	2.83021
0.685214	1.47947
1.2697	0.217448
2.62812	0.821403
1.58351	0.392269
1.16488	0.668198
4.74475	1.04566
3.34905	1.62259
2.6809	0.687632
1.76705	0.0231673
0.9623	0.228698
1.29626	0.482039
2.57753	0.0172525
2.38169	0.231901
0.328065
1.68132
0.900709
1.14337
1.65313
1.62045
3.11267
1.97401
1.54342
0.808907
0.85955
1.24107
1.48913
1.94695
1.34219
0.0688356
0.591057
0.974654
1.36094
0.915922
0.740746
1.72847
1.05649
0.96542
1.23328
0.783342
2.11837
0.361974
0.229461
1.95404
1.2556
0.734644
0.907353
0.439685
0.70926
1.37401
1.70211
2.8244
6.57979
0.711142
0.314862
0.245464
0.715502
1.14123
1.10818
0.965311
0.559648
0.535604
1.0375
0.340232
1.38675
1.48187
0.956958
0.140907
0.104258
0.231952
0.402563
1.3956
1.20307
0.660427
0.780121
0.619122
0.573687
1.89136
0.868878
1.91006
0.208558
1.71034
1.08996
1.863
1.06984
0.821615
0.910264
1.61743
1.32022
0.833773
0.778875
1.04614
0.317894
0.495368
0.334479
0.877258
0.715408
0.710912
0.694273
0.982993
0.981774
1.33182
0.77878
0.698646
0.929584
1.29081
0.959761
0.912769
1.24251
1.70349
0.783315
0.481681
0.975858
1.23562
0.96431
0.785603
1.51106
0.638537
1.03568
0.276928
0.26699
0.343536
1.14346
0.716031
1.791
0.419459
0.519196
0.712401
0.474059
0.514903
0.486148
0.493242
0.308363
0.37753
0.688898
0.745259
0.994514
0.876499
1.27145
0.153755
1.73317
1.34156
1.04558
0.835559
1.40379
1.46409
0.556643
0.681873
1.74113
0.423804
0.984021
0.624388
1.46999
0.114602
0.99094
2.08055
0.852076
0.633297
0.420122
1.5998
1.02929
1.91733
1.92307
0.513794
1.67637
1.28173
1.07017
1.89836
1.23912
0.769771
0.865775
3.30143
0.701441
1.13501
1.28678
2.32173
2.4384
0.371786
0.689228
0.285129
1.07984
1.26032
0.482899
0.695108
0.779018
0.815603
0.410481
0.545131
0.641236
0.783389
0.519049
0.371768
0.605387
0.506033
0.500823
0.807126
1.18454
0.509266
1.56371
0.811717
0.97915
0.856628
0.825671
0.814296
0.53431
0.388303
0.94764
0.627013
0.648037
0.709029
1.01739
1.93307
1.07698
0.79324
0.994745
1.7216
2.25544
2.1745
1.22665
1.14889
2.14456
2.41408
2.37992
2.41188
2.26529
1.23974
0.716183
0.36929
0.650516
0.767477
0.514057
1.45054
1.22637
0.837649
2.08668
1.10944
0.906029
1.33876
1.3859
1.66536
0.926667
1.58831
0.666347
0.636764
1.06591
1.16467
1.16126
1.00009
1.49525
0.723854
0.771815
0.571197
0.878305
0.48692
0.534829
0.822137
0.52188
0.60579
0.478779
0.461089
0.387332
0.693535
1.30998
0.454589
1.34104
1.36539
0.501461
0.748514
1.33834
1.30256
0.833963
1.38923
0.381066
0.274158
0.135721
0.425777
0.833578
1.47589
1.28686
0.384098
0.622004
0.673214
0.750841
0.749551
0.532082
1.43367
1.28624
1.19297
1.16283
1.23609
0.490204
0.955815
1.78423
0.732616
1.25614
0.464925
0.611737
0.385874
0.369775
0.492447
0.141617
0.534159
0.986721
0.954826
1.02548
1.36035
1.07746
1.20861
1.51041
2.94482
0.737206
0.443968
0.468827
0.573508
2.06754
0.766671
0.23985
2.27097
0.802871
1.17369
1.15705
1.35398
0.155173
0.733324
0.337145
1.23782
1.33274
2.42609
1.21644
0.956928
1.46222
0.947431
0.907869
1.43734
1.20213
1.42802
1.19042
2.34518
1.52421
0.707774
1.13124
2.26114
1.58424
0.751864
0.936446
0.435036
1.41649
0.583108
0.545664
0.502974
0.481748
0.568113
0.673885
1.08466
1.39558
3.00453
0.460624
0.742631
0.736906
0.578882
1.05078
0.376543
1.26626
0.0918746
0.0697168
0.466867
0.196665
0.557557
0.654818
0.459402
0.592441
0.552841
1.03506
1.23844
1.01794
1.04512
1.10098
2.74219
1.04014
0.908575
0.441821
1.28873
0.472568
0.392144
0.432501
0.275878
0.0758717
0.991231
1.31198
1.06162
0.594547
0.216061
0.696751
0.637918
0.937506
1.58873
0.845933
1.17436
2.04755
1.72478
0.71442
1.42337
0.654048
0.644098
0.602379
0.468557
0.270102
1.11609
0.659509
1.15509
1.41797
0.525788
1.34375
1.12817
1.79683
1.56064
0.613603
1.20424
2.40904
1.52174
2.23821
1.99673
0.910996
0.692514
1.64554
0.18988

## Sheet: Fig. 5 D
norm EEA1 intensity at PI3P positive organelles
Pclowt/wt	Pclogt/gt
0.115162	0.665564
0.55734	0.657355
0.403338	0.947913
1.42206	0.240694
1.14945	1.48154
1.56814	0.832765
1.14914	0.384068
0.679206	0.471234
0.756578	1.6311
1.0867	0.0872845
0.751632	0.0383557
0.945629	0.0631844
0.368668	0.397474
0.774292	0.231391
0.163867	1.2501
0.475899	0.219869
1.35619	0.993003
2.49324	0.839459
0.497255	0.452036
1.11821	0.443872
0.817198	0.555277
0.944888	0.460055
0.482478	0.533246
2.00469	0.517724
0.884911	0.170124
1.36527	0.175948
2.24731	0.492889
0.612631	0.590668
-0.00852004	0.414951
0.437913	0.4585
0.326962	0.403348
0.717274	0.29176
0.577548	0.116636
0.571978	0.282376
1.25392	0.0932943
1.39422	0.218836
1.11269	0.0977659
0.527335	0.395004
2.41327	0.393727
0.291723	0.354616
-0.0896627	0.233197
0.440145	0.101049
0.739477	0.106812
0.880064	0.378238
0.703604	0.28366
0.72597	0.0539729
0.542945	0.53888
1.27636	0.888072
0.563004	0.304823
0.890247	0.922901
0.906295	0.6836
1.52349	0.488759
1.17237	0.316521
1.39358	0.210729
1.28012	0.276671
1.31587	0.219395
1.54053	0.464157
1.80987	0.558275
1.51883	-0.00149742
1.13022	0.138066
0.553678	0.565816
0.49918	0.467108
0.446819	0.25336
0.746384	0.49816
0.695989	0.543396
0.527426	0.518398
0.299016	0.466729
0.491435	0.896216
0.623783	0.224565
0.763309	0.251456
0.453679	0.328469
0.563001	0.468589
0.693397	0.937394
1.07749	0.419819
0.555321	0.443032
0.265935	0.428346
0.362238	0.412942
2.649	0.545087
1.36851	0.347911
1.97286	0.374624
1.95366	0.777643
1.93209	0.65516
0.859195	0.326078
1.22873	0.429643
1.42897	0.506406
1.60115	0.767426
1.21624	0.840722
3.02695	1.00222
2.0613	0.871808
1.85913	0.606096
1.58278	0.25085
1.41717	0.607969
0.940619	0.835732
1.5529	0.59992
2.13131	0.373181
1.51753	0.63376
-0.36733	0.613054
0.0576929	0.601099
0.791028	0.869304
0.800293	0.496825
0.460126	0.792501
-0.0029371	0.901952
0.219131	0.498295
0.675791	0.404547
0.449567	0.279964
0.294782	0.737705
0.124112	0.181419
-0.309257	0.1524
-0.00491207	0.328121
0.243136	0.147288
0.161262	0.404402
-0.0348595	0.0937583
0.600032	0.302126
0.0686385	0.22176
0.554867	0.269916
0.852626	0.358284
1.90785	0.35554
0.00597588	0.718944
0.425781	0.6188
1.85212	0.5065
0.841417	0.371619
0.398842	0.611526
1.73745	0.355896
0.336786	0.0593121
0.399076	-0.0157731
0.644187	0.34095
1.05582	0.640095
1.18977	0.628624
1.2372	0.59827
1.06951	0.735056
0.715085	0.612309
0.40117	0.970343
0.505762	0.466173
0.803901	0.647982
0.842613	0.557645
0.42737	1.11198
-0.0194793	1.26423
1.43128	0.798
0.513455	1.0347
0.594808	1.33727
1.17327	2.04362
2.30229	1.14214
1.02783	0.532704
1.74265	0.544389
1.60048	0.222186
1.44408	0.413548
1.15318	0.873417
0.759891	0.820111
0.859676	0.272558
1.25575	0.305182
0.826355	0.366524
1.20268	0.774943
0.891165	0.309061
1.50279	0.377344
0.588788	0.38835
-0.213907	0.429748
0.857339	0.303221
0.227705	0.303668
0.31125	0.292868
0.300368	0.835806
0.510051	0.0226469
0.646179	-0.0386065
0.93423	-0.0545627
0.708313	-0.0445078
1.24888	0.383747
1.34961	0.471061
2.09796	0.801035
2.6751	0.0924336
1.61075	0.267423
1.4638	0.823363
1.66654	-0.0149905
0.169813	-0.0141233
0.715153	-0.0109625
0.449793	0.579319
0.12979	0.553705
0.829156	0.238217
0.454448	0.0146892
0.613119	0.482085
0.82336	0.159412
1.58136	0.310514
1.95371	0.77457
1.38103	0.769099
2.96046	0.390776
1.50301	0.389587
1.67752	0.707402
2.14005	0.106073
1.88425	0.0120637
1.5591	0.575332
1.07854	0.334957
1.1515	1.24511
1.32004	0.0991433
0.56982	0.675392
0.594384	0.52191
2.68338	0.229898
2.0014	0.295884
4.03536	0.391262
3.06812	0.513477
2.00655	1.61353
0.204278	0.118993
0.259291	1.41435
0.376953	1.07132
0.229791	0.941455
0.63935	1.38573
0.80327	0.890001
1.2928	0.730298
0.935686	0.980941
1.00988	0.177335
1.44629	0.14107
0.851396	0.189318
1.0152	0.260622
1.07021	0.73984
1.18478	0.771329
0.843192	0.148837
0.941899	0.480764
0.874574	0.601318
1.73785	0.560616
0.983038	0.760907
1.09671	1.97829
0.653323	0.84985
0.235331	1.18356
0.390153	1.10671
0.507929	1.14707
0.553736	1.05791
0.460799	1.63737
0.32494	0.276149
0.239326	0.460141
0.51259	0.562835
0.849735	0.670189
1.6245	0.568161
3.2133	0.593444
1.30721	0.823901
2.13698	0.300552
1.1403	0.543092
1.63671	0.401914
1.39061	0.402029
0.98049	0.199848
1.33716	0.44916
1.0498	0.0584483
1.23978	0.57869
0.824674	1.07664
0.613738	0.531889
0.620388	1.4851
0.640904	0.544308
0.382057	0.10225
0.946774	0.223026
0.219583	1.14928
0.408006	1.84398
0.378506	1.7607
0.638241	2.85619
0.324167	3.32609
0.660532	0.693804
0.611297	4.15387
1.11413	0.271381
0.961413	1.48388
1.43963	0.310638
0.497507	1.01542
0.574918	1.14951
0.185423	0.525568
0.496512	0.635914
0.370081	0.572148
0.5798	0.650446
0.936902	0.795618
0.0046526	0.401907
0.618283	0.654655
0.701464	0.689037
0.364097	0.835211
0.225246	0.28524
0.309528	0.697133
0.371412	0.624267
0.732517	0.275368
0.771108	1.16881
1.34714	0.115336
1.14729	0.46435
1.42211	0.652994
0.86005	0.401027
0.724199	0.571926
2.42334	0.484314
1.18344	0.29267
1.16548	0.179217
2.18102	0.363875
1.81093	0.44228
1.66554	1.08873
2.04106	0.318175
1.08785	0.510263
1.01809	0.213821
1.63216	0.986925
1.48976	0.875692
1.84398	0.831545
0.962086	0.215259
1.61441	0.288232
0.913838	0.299435
0.948779	0.473333
0.937132	1.15051
0.948335	0.606086
1.66731	0.37696
1.20729	0.795618
1.81249	0.426532
2.53613	0.742717
2.14431	0.496397
2.23203	0.42631
1.80239	0.652107
1.09993	0.672844
1.8543	0.457914
1.78266	0.204171
1.13576	0.477772
1.83245	0.328161
0.950661	0.819791
2.44142	0.567487
1.10792	0.47289
1.39183	0.637139
1.20241	0.672844
2.12268	0.909959
1.48055	2.02209
2.02221	0.890109
0.238775	0.636802
0.728966	0.341354
0.158372	0.820235
0.309528	0.394147
0.799834	1.33582
0.681721	0.773212
1.03318	0.335255
0.628491	1.28492
1.12456	0.58257
1.24622	0.811917
1.13875	1.87215
1.49198	1.19863
0.662866	1.5512
0.621727	0.238216
1.26796	0.216262
0.32872	0.446382
1.72243	0.319285
0.458916	0.339472
0.66797	0.253414
0.773663	0.486641
0.330824	0.341025
0.722309	0.248753
0.349014	0.528346
2.42124	0.205839
1.95356	0.775768
2.03784	0.378843
1.598	0.727635
1.28858	0.525017
1.86428	0.164134
0.941348	0.300659
1.12711	0.816027
2.00601	0.537544
2.35891	0.296336
1.98639	0.446719
2.55011	0.244989
3.05272	0.189203
1.59701	0.159038
1.5695	0.545977
1.67264	0.771666
1.91142	0.948442
1.48466	1.22903
1.85874	0.699023
1.44085	0.628821
1.958	0.956431
1.46591	0.554142
1.79319	0.291124
2.07411	0.212604
2.72699	0.0690927
1.73962	0.348677
1.20175	0.312635
1.10271	0.615398
0.757915	0.592556
2.10327	0.900309
1.95167	0.558174
1.86428	0.449825
1.5725	0.21027
1.59135	0.526349
1.71622	0.104469
1.50362	0.499175
1.12023	0.38827
1.76824	0.386273
1.72898	0.0727505
2.48778	0.0919424
1.41513	0.234115
1.16626	0.210492
1.22115	0.147942
1.57549	0.0616623
1.46902	0.0838463
1.64603	0.15515
1.05702	0.0951564
3.34772	0.0729724
1.72809	0.0164142
1.66122	0.212045
2.51129	0.133418
1.21971	0.0866164
2.0934	0.157148
2.42501	0.196963
3.02765	0.626379
2.03751	2.56485
1.23713	2.39927
1.57371	1.88524
1.89733	0.144284
0.612299	0.73906
1.00068	1.82247
1.54909	1.65112
1.32895	0.587674
0.811481	1.26773
0.578246	2.96776
0.295884	2.50696
0.373295	0.49818
0.93225	1.08796
1.08873	0.27282
0.333817	-0.276478
0.582019	-0.27171
1.10115	-0.475331
0.565712	-0.450598
1.97951	0.251531
0.757242	0.126653
0.417877	0.484207
0.808589	0.408679
1.0345	0.352787
0.464901	0.150498
0.912063	0.240443
0.630374	0.629379
0.439066	0.322399
0.757578	0.39404
0.734063	0.254745
0.778316	0.680741
0.970955	0.316218
0.501058	0.633176
0.339808	0.335559
0.720648	0.965772
0.362872	0.689252
0.264395	2.24405
0.405128	0.725343
0.201845	1.26773
0.234337	2.07581
0.556728	1.08811
0.456804	1.10976
0.611297	1.32455
0.864932	0.187858
0.779426	0.258379
0.370525	0.682682
0.813249	0.215807
0.798832	0.363968
0.60043	0.30141
0.887553	0.269017
0.637139	0.41551
0.748036	0.665933
0.895542	1.10384
0.586894	0.952535
0.277702	1.16501
0.350652	0.462711
0.84486	0.432815
0.747148	0.519069
0.468451	0.744876
0.64235	0.681111
0.0400369	0.601523
0.449711	0.769121
0.306314	1.08589
1.24644	-0.137797
0.306536	-0.0831953
1.51682	0.0358093
0.817465	0.117894
1.3193	0.0925372
0.386495	0.201274
0.547974	0.115307
0.727298	0.152598
0.72475	0.852584
0.675178	0.574219
0.210829	0.321581
0.718758	0.137235
1.17224	0.30724
0.773105	0.11253
1.88413	0.448453
1.13155	0.0996633
0.861604	0.140568
1.27139	0.110863
0.390933	0.231905
0.833657	0.256342
0.376294	0.0324825
0.198294	0.124094
0.303873	-0.128078
0.163361	0.762742
0.382615	-0.130581
2.25554	0.107345
1.02408	0.8934
1.50728	3.67984
0.913065	0.133998
1.25686	0.00439813
0.977276	0.00267313
1.24156	0.00289331
1.08119	0.00916181
2.67199	0.0112104
0.885892	0.00826861
1.04736	0.0160582
3.15863	0.0184855
1.34658	0.0225114
0.538539	0.0161036
0.371519	0.017754
0.800714	0.0127541
0.515918	0.0158414
0.414556	0.0160681
0.644454	0.0474271
0.740942	0.0437895
0.383947	0.0243851
0.641684	0.151715
0.215481	0.110107
0.305534	0.251184
0.768995	0.0352784
0.357324	0.246346
0.450262	0.134718
0.247315	0.017068
0.0479111	0.0791682
0.233786	0.0262394
1.3823	0.0853074
0.619056	1.37576
0.980268	0.033958
0.512812	0.631226
1.23047	0.0472685
0.987476	0.421391
0.615735	0.114434
0.987147	0.0291975
0.629486	0.193168
0.563164	0.573783
0.267272	0.198618
0.826671	0.0940679
1.11491	0.0441812
0.961527	0.0341813
0.382171	0.040712
0.721865	0.0478737
0.375514	0.119893
0.72364	0.261068
0.999345	0.112942
0.508488	0.144857
0.788409	0.0405371
1.22903	0.108453
0.768001	0.0660647
1.12178	0.213071
1.26718	0.0364079
1.43996	0.0324045
1.54377	0.108259
0.606751	0.0922525
1.08718	0.0538318
1.39161	0.018822
0.78342	0.0408835
1.20929	0.015945
0.803048	0.0376441
0.922937	0.0219936
0.975723	0.0639741
0.591669	0.0132429
0.453147	0.0206053
0.367862	0.0113368
0.271381	0.00703241
0.516699	0.0122621
0.372637	0.00566023
1.02818	0.0193204
1.34281	0.110113
1.21029	0.0370907
1.59467	0.0204175
1.28603	1.50481
1.08497	0.183744
1.05069	0.0530163
0.614847	0.0203139
1.11568	0.0626343
0.244767	0.03178
0.831216	0.026136
1.20485	0.0240261
0.976725	0.0494855
1.06423	0.0309031
0.986596	0.0338901
0.744164	0.026657
0.314747	0.0267251
1.32052	0.0570163
0.793177	0.0324369
0.880352	0.124469
0.69248	0.0477411
0.708007	0.0180324
0.506827	0.014971
0.236449	0.0102363
0.318627	0.0193948
0.349343	0.120832
0.46402	0.0147021
0.266055	-0.00883177
0.800944	0.0118769
0.217815	0.053301
0.098929	0.01022
0.269606	0.764129
0.291897	0.004301
0.161586	0.320968
0.177227	0.170806
1.18944	0.0217379
0.906186	0.0086634
0.578468	0.0616471
1.47568	0.0282395
0.715766	0.0133688
1.56595	1.94e-05
1.08651	0.00414893
1.53412	0.00029766
1.54698	-0.00923617
0.265726	0.00939159
0.158701	0.0279191
0.243435	0.023123
0.193083	0.12988
0.337589	0.2569
1.56118	0.00569261
0.165581	0.00746271
0.485753	0.0695663
0.619944	0.0181358
0.903638	0.122175
0.423762	0.0311165
0.145616	0.270324
0.41966	0.364505
0.50206	0.0400066
0.457807	0.389204
0.825117	0.0326537
2.74041	1.16008
0.903301	0.490974
1.54987	0.465547
1.34259	0.0262946
1.43286	0.0219029
1.99337	0.0288156
1.09727	0.0157702
1.15994	0.015686
0.686825	0.0177185
0.354064	0.0219288
0.22626	0.0167185
0.26652	0.0179967
1.66381	-0.000634174
0.722935	0.0158512
0.516476	0.218042
0.501483	0.0595307
1.12272	0.0213462
2.30531	0.0160841
1.2433	0.0279709
0.454193	0.0259223
0.511566	0.0344823
1.59348	0.0348026
3.49309	0.0250649
2.11291	0.0289224
4.11256	0.0266085
1.16779	0.0273756
1.51241	0.0295793
0.723957	0.0159028
1.6441	0.000618097
1.80845	0.0485824
0.50815	0.199129
1.45707	0.00073131
1.05868	0.00721999
0.908578	0.17143
0.698505	0.177854
0.525358	2.09371
0.394503	1.83416
1.41358	0.443877
0.082825	0.0588737
0.493342	0.0264498
0.515365	0.0395243
0.198228	0.174288
1.71814	0.0270839
0.410702	0.0508251
0.771988	0.34311
1.70463	0.0945275
0.344262	0.0407703
0.616242	0.234233
0.771432	0.264948
3.4979	0.0283981
1.46873	0.023479
1.23275	0.211699
1.18176	0.028217
0.901726	0.0244336
1.10893	0.0760549
0.38488	0.0318414
0.253564	0.0230357
1.11633	0.0669807
0.618368	0.0186796
0.920608	0.0482783
1.40655	0.140961
3.05712	0.070398
0.327507	0.0978058
1.09736	0.274152
1.19703	0.0359742
0.920978	0.728779
0.222384	0.226171
0.385901	0.516517
0.323158	-0.00925895
0.472704	0.0610938
0.851295	-0.000783339
1.14225	0.142835
0.170465	0.38532
0.237371	0.311
0.624013	-0.000132864
0.1241	0.0207281
0.105314	0.138951
0.0245533	0.00459218
2.47413	0.0375371
0.162288	0.532728
1.00452	0.00890926
1.16375	0.000601796
1.49032	0.00299022
0.87165	0.229437
0.392194	-0.0100519
0.339511	0.0800743
0.554605	-0.00355026
1.16209	0.0132071
0.213683	0.0142524
0.14333	0.708692
0.292767	0.266119
0.481019	0.0311132
0.75643	0.237064
0.00312621	0.0502329
0.00461474	0.104068
0.536213	0.103667
0.546129	0.138304
0.319896	0.048411
0.963093	0.0569288
1.37288	0.0294304
0.604294	0.0194982
0.305	0.0169934
1.94301	0.022699
2.84297	0.0511877
2.34724	0.352635
0.376482	0.393337
0.276925	0.484498
0.686116	0.0108492
0.671825	0.957447
1.80391	2.25309
0.465501	0.822062
0.818569	0.307317
0.364217	2.50111
0.301116	1.00296
0.782142	0.118654
0.946863	0.354888
1.2867	0.369892
0.86486	0.267642
1.01193	0.396356
1.77065	0.354494
0.545252	0.106231
0.358605	1.12503
1.56701	0.638015
0.491252	2.23916
0.596754	0.455606
0.859546	0.532593
0.6832	0.209442
0.43165	1.45721
1.42512	0.250604
-8.87e-05	0.258916
1.40438	0.385354
-0.00233662	0.34205
0.0573334	0.352876
0.609369	0.122415
1.10244	1.77104
0.468071	3.20078
0.917938	0.511684
0.613899	0.774208
0.22455	0.603478
0.581679	0.686109
0.267809	0.524019
0.325573	0.927702
0.625216	0.73392
0.564715	0.470827
0.281268	0.404033
-0.00164081	1.69834
0.207123	0.279648
0.156854	0.52251
0.275906	0.181884
0.264725	0.425707
0.209599	0.873307
2.70522	0.554289
0.420854	0.821996
0.394061	0.469013
0.324353	1.05379
0.626	-0.0425183
0.658051	0.28901
0.140919	0.23151
0.649094	0.368885
0.310514	0.80579
0.443586	0.464332
0.655032	0.329691
1.45709	0.277791
1.40708	0.226436
0.220958	0.562469
0.329851	0.616995
0.377456	2.78862
0.304456	3.4015
0.27011	0.225932
0.160569	0.208588
0.141935	0.436663
0.16944	1.00847
0.130754	0.46606
2.92827	0.111216
0.364809	0.221099
1.22601	0.0338785
1.85979	0.0809891
0.63544	-0.123661
0.229518	0.33004
0.906433	-0.174229
0.537375	-0.0161417
1.11334	0.372975
0.404181	0.563147
0.550628	0.429622
0.533401	0.263048
0.549133	-0.010499
1.86667	0.0949003
2.45567	0.308453
1.51336	0.400335
0.854077	0.101133
0.873479	-0.123269
0.0153917	0.369081
0.023615	-0.0869623
0.397265	0.766311
0.759514	0.728911
0.528149	1.5864
0.466854	0.376977
0.120227	1.01374
0.478961	0.026683
0.514349	0.10472
0.540605	0.0861081
0.412942	-0.0509181
0.332709	0.631242
0.461378	0.157988
0.42844	0.161845
0.240929	0.0670475
2.28041	0.0823151
1.847	0.109334
2.28165	0.205934
0.437343	0.181127
1.1074	0.374693
1.70089	0.238088
1.68648	0.428961
3.85172	0.987359
3.81543	0.146851
2.44612	0.159676
2.42798	0.124167
0.861362	0.647901
0.929275	0.154542
1.45555	0.174624
5.91537	0.262438
3.69021	0.172502
4.46734	-0.0909409
4.17967	-0.13811
1.79927	-0.125102
3.77853	-0.0354857
3.86627	-0.144546
1.28788	-0.137312
0.314142	-0.124693
0.12422	-0.0772715
0.48779	-0.0989966
0.426744	-0.121474
0.228366	-0.0404159
0.491783	-0.0756733
0.931941	-0.0689418
0.63999	-0.0818128
0.0385308	-0.0395026
0.363314	-0.0692378
0.0597412	-0.0738483
0.111974	-0.0308532
0.480107	0.0781832
0.325709	-0.0137386
0.293498	-0.00458688
0.574498	-0.062985
0.262796	0.0964631
0.0369063	-0.0562535
0.34698	-0.0451398
0.798158	0.0544269
8.65091	0.00191632
5.07904	-0.0127119
2.96374	0.023665
1.65385	0.0604514
0.424783	0.17686
0.597686	-0.0137386
2.75113	-0.025627
1.74731	-0.0309902
0.765789	0.0846644
0.930815	0.037495
1.61244	0.0505029
0.555605	0.14012
0.57199	0.0310595
0.932106	0.0382933
0.675686	0.0509123
1.59366	0.0983337
0.369667	0.0766086
0.265275	0.0541309
0.612585	0.135189
1.63123	0.099932
0.400113	0.106663
0.594841	0.0937925
0.486686	0.136103
0.795042	0.106367
1.48739	0.101757
2.37338	0.144752
3.10591	0.253788
1.48047	0.161867
1.50709	0.171018
0.526728	0.11262
0.626744	0.272068
0.957258	0.119352
0.800123	0.130465
1.95414	0.230032
1.62501	0.177522
1.5958	0.162893
0.515145	0.19927
0.561233	0.236057
0.532353	0.352465
0.202948	0.161867
0.0492329	0.149978
1.56083	0.144615
1.08268	0.175605
0.823527	-0.0597664
0.305883	-0.0384067
0.794103	-0.0228887
0.573754	-0.0512997
0.701796	-0.0493377
1.80067	-0.0494511
2.77844	-0.027019
1.2017	-0.0078495
1.40847	0.0113877
1.74071	0.0253546
0.775119	0.0930178
1.35602	0.157897
0.805443	0.05922
0.675174	0.103492
1.11049	0.126998
1.06585	0.0641502
0.333265	0.0723193
0.264217	0.142081
1.34828	0.122729
1.49842	0.100617
1.7057	0.0957797
0.29181	0.223803
1.28252	0.102762
1.46174	0.102033
1.02835	0.0918085
0.17062	0.134963
0.2571	0.130946
0.202115	0.071795
0.0601903	0.334209
0.0527548	0.061456
0.0777324	0.0424928
0.0811431	0.0442044
0.236125	0.0568927
0.152773	0.0562314
0.160537	0.0657248
7.25224	0.0700598
0.127292	0.075719
0.123246	0.0653359
0.640639	0.0964867
0.802771	0.0872216
0.682238	0.245163
1.4662	0.0743506
0.508665	0.0738704
0.303423	0.0803972
0.999221	0.0897992
0.196187	0.0809688
0.911866	-0.051643
0.667562	-0.0576675
0.570955	-0.063418
0.130244	-0.0440895
0.805746	-0.0188955
0.145554	-0.0103138
0.399833	-0.0312862
1.20418	-0.0142393
0.750717	0.0418992
0.124864	0.0415795
0.186957	0.0375627
0.353858	0.0577604
0.289797	0.0189412
0.935946	0.0814254
1.59222	0.125424
0.343207	0.0520775
0.878205	0.0372666
0.678804	0.0308091
0.302285	0.0408269
0.385594	0.0581477
0.746408	0.0455271
0.837721	0.100937
1.0385	0.0655642
0.466322	0.133045
1.48418	0.110521
0.16139	0.135737
0.13171	0.0433825
0.579507	0.106391
0.499457	0.0916935
0.131995	0.0468057
0.69407	0.0982203
0.177377	0.0769976
0.637686	0.0919675
-0.219197	0.039046
0.0216515	0.0261986
0.0143473	0.0198324
0.0554214	0.0309681
0.284416	0.0604294
0.158699	0.00759914
0.378113	0.0232997
0.270594	-0.0172516
0.63191	-0.00855651
0.232559	-0.0239154
-0.0472645	-0.00988077
0.150234	-0.0398663
-0.0354767	-0.025331
-0.00831231	-0.0228887
0.264753	0.0580107
0.645055	-0.0411449
0.170837	-0.0406206
0.132147	-0.0837291
-0.00629912	-0.0817655
0.163095	-0.0964851
-0.0322396	-0.0939752
0.00625536	-0.0536963
-0.0621159	-0.0150613
0.117777	-0.023391
0.397273	0.0930855
0.239252	-0.061456
0.4039	-0.00540726
0.218408	-0.0249877
0.582897	-0.0798035
0.164692	-0.0951845
0.463915	0.476245
0.772851	-0.100822
0.258739	-0.076015
0.085014	-0.0772023
0.261036	0.0743727
0.0774457	-0.0241201
-0.130836	-0.016658
0.0945502	0.0280708
-0.180068	0.00385783
1.20674	0.0153589
0.815326	0.0151762
0.188314	0.0138299
0.986581	0.0396081
1.82599	0.0406899
0.426911	0.263397
0.511204	0.102283
2.0713	0.190918
2.24395	0.114217
1.6894	0.14126
1.31467	0.103173
2.5273	0.180671
1.83452	0.148632
0.318362	0.155568
1.94512	0.173665
1.42394	0.244456
1.32408	0.184322
1.69355	0.175742
2.05037	0.213716
1.61285	0.169648
0.485155	0.0231989
2.38607	0.0487677
2.30847	0.0662712
0.704548	0.046738
1.04469	0.0649029
2.01513	0.119306
9.09467	0.0941814
2.95934	0.101393
0.600024	0.117481
3.1451	0.132794
-0.140371	0.171612
-0.0422331	0.168554
0.168433	0.150435
0.2134	0.234073
1.08397	0.200754
0.426342	0.1055
0.281793	0.101439
0.33914	0.136879
1.24064	0.113282
1.20691	0.173163
1.80042	0.174213
4.38373	0.119397
1.39063	0.175492
1.64485	0.100937
4.57276	0.0885899
0.0243876	0.0980377
0.923896	0.0912148
0.741313	0.0950711
0.529576	0.116933
0.467308	0.101918
0.204325	0.133889
1.40573	0.101759
0.828514	0.105797
1.62663	0.123484
3.97105	0.102168
0.281355	0.100411
3.31366	0.087198
4.62648	0.0560488
0.825737	0.035122
-0.0958843	0.0636243
-0.0875508	0.103287
-0.116991	-0.107484
-0.112441	-0.164125
-0.0448152	-0.109972
-0.11686	-0.0780919
-0.157452	-0.106549
-0.123705	-0.0540836
0.0152453	-0.0696708
0.334831	0.20443
0.224117	-0.0731397
0.0552479	-0.098425
2.48469	-0.0672286
0.138184	0.0406899
5.63084	-0.0396837
3.15647	-0.0505706
0.246426	-0.0110444
9.56825	0.177477
2.74901	0.0455964
0.155441	-0.00248633
0.121408	-0.0153353
0.0671232	-0.00613789
0.0518795	0.156143
0.137112	0.145348
0.3118	0.179239
1.22106	0.212121
0.607591	0.219954
0.329844	0.256252
0.377175	0.291147
0.409106	0.298779
0.371488	0.293306
0.57673	0.356216
0.762397	0.322876
0.874357	0.71283
0.290454	0.243199
0.603303	0.266246
0.443183	0.0924775
0.336843	0.0947362
0.233741	0.147455
0.327701	0.209859
0.158744	0.259263
0.17576	0.243348
0.428573	0.196456
0.005949	0.190633
0.000241461	0.456675
0.0151351	0.20529
0.272803	0.156188
0.205746	0.143336
3.31167	0.158752
0.386557	0.381716
0.153669	0.546644
0.770729	0.179236
0.275122	0.306206
0.516474	0.0941368
0.192885	0.213327
0.246885	5.6621
0.232932	0.648163
0.206993	2.54786
0.857319	0.0777164
0.596043	0.0792753
2.29428	0.0700362
5.33586	0.151168
1.44781	0.10709
0.805441	0.151321
0.0778184	0.200773
0.963769	0.215433
3.84265	0.238678
2.29025	0.312885
-0.238771	0.296565
0.759225	0.209457
0.55884	0.222764
-0.155222	0.259865
0.354144	0.215537
-0.214383	0.498498
1.37128	0.497747
0.58058	0.314091
9.82802	0.300033
0.169023	0.229997
-0.0111978	0.207604
0.258741	0.0246514
-0.0296786	0.0712937
-0.110013	0.122353
-0.0699438	0.161516
0.0183722	0.260773
0.223112	0.236773
0.45753	0.340298
0.299838	0.43785
0.359328	0.333269
1.69428	0.453363
6.03218	0.39683
0.978225	0.315948
0.0600378
0.0419071
0.654855
0.268823
0.330152
0.1414
0.324901
2.03164
1.29484
1.11728
0.372539
0.500333
0.243452
0.875472
0.557549
0.653959
0.304365
0.0848842
-0.0545899
-0.0546336
0.090723
0.0402667
0.0249339
-0.0851015
6.4066
1.2339
1.6649
5.11187
7.58667
7.63683
0.90688
0.408494
0.61903
2.24384
8.55521
0.123267
0.410288
2.30394
0.34137
0.497926
1.59231
0.794592
0.350317
0.710912
0.481086
0.549324
0.691381
0.541866
0.377175
0.354931
0.440996
0.585237
2.73282
1.12494
0.80649
1.66265
2.06605
1.30783
0.863814
1.1013
1.18172
0.76852
0.418226
1.04436
0.558292
0.826152
0.990123
10.7127
4.01421
0.855263
8.68272
0.674911
1.35759
0.723946
0.200825
0.290541
1.17172
0.568834
0.223746
0.76745
0.362827
0.493574
0.252048
1.3613
-0.09797
-0.101211
-0.087905
-0.0176862
-0.0640573
0.11691
0.0787533
0.51465
0.0313775
0.26109
0.00607018
0.0803972
-0.00600247
-0.0129166
-2.36e-05
-0.0210181
0.0605207
0.588886
0.0467585
0.144728
0.0751474
-0.136651
0.172843
0.964901
-0.108695
0.00075267
-0.0585351
1.31312
0.214308
0.102259
-0.0424471
0.0236194
0.024213
-0.00709683
2.36534
1.2385
-0.010224
1.91906
0.0448422
-0.00292093
0.223003
0.814892
0.0502053
0.220493
0.0363534
0.121429
0.159744
1.21967
0.103036
0.111661
0.101483
0.125194
0.374647
0.518873
0.71586
0.152306
0.141716
0.160201
0.176997
0.158443
0.145846
0.154427
0.140872
0.125765
0.132634
0.100571
0.139913
0.0888403
12.5589
2.47284
1.60023
2.64564
0.266932
0.0365344
2.93752
5.37054
0.344591
3.81627
3.58373
3.31782
3.84411
0.221268
3.05064
1.23918
0.744045
6.06767
4.24925
0.504267
0.936582
8.84051
0.229325
5.6267
1.50662
0.415951
0.470972
0.221269
2.06401
0.0520996
1.71153
-0.0162249
0.0427888
1.82291
1.03403
0.0272709
1.3228
5.06239
0.0664082
0.15178
0.210908
6.22506
0.223482
0.160862
0.158785
0.208351
0.208283
0.89619
0.265312
4.53195
0.201004
0.543633
1.03971
0.329416
0.743108
5.9725
2.95117
0.249954
0.157897
0.0791201
0.0293715
0.540531
0.0757426
0.0398222
0.0328845
0.0890466
0.107463
0.0731413
0.0209504
0.381927
1.09138
0.105545
0.104953
0.127294
0.36205
0.143473
0.878116
0.0304202
1.32704
0.0433148
2.06988
0.214675
0.0222274
0.0940901
1.31278
0.140598
0.061593
0.675742
0.00766842
0.0479473
0.971134
0.00849037
0.0109547
0.175103
0.0190325
-0.0682332
-0.0498164
-0.0460058
-0.0573022
-0.0867177
-0.073916
-0.0630527
-0.0308532
-0.00369564
-0.0339332
-0.0330671
0.136514
0.00903677
-0.0167493
-0.00339961
0.0152896
0.0634652
0.0331128
0.0176862
0.0138299
0.0679372
0.0831134
0.047604
0.00244224
0.0323837
0.0291195
0.0460987
0.0360794
1.40584
0.251416
0.859358
3.88211
9.82958
3.64587
0.396257
0.142492
1.68966
10.1144
1.62508
5.37102
0.288726
0.250959
0.294911
0.965519
0.0779549
5.12077
0.270357
1.55491
2.27157
7.44069
16.3115
0.387107
3.79731
0.315222
2.94085
0.13649
0.333729
1.51915
0.14336
0.0305115
0.157417
0.129895
0.209266
0.0784572
0.109813
5.20341
1.8624
4.06419
0.65027
0.99162
1.83318
2.25566
2.05383
0.14098
0.222064
0.15112
0.270462
0.559497
0.23582
0.300134
0.384681
0.50382
0.314541
0.376849
0.40873
0.407272
0.302292
0.286879
0.326642
0.283013
0.334173
0.299732
0.685012
0.325589
0.713731
0.202332
0.138469
0.198316
0.29908
0.258213
0.266042
0.219001
0.26017
0.248821
0.452511
0.254596
0.57697
2.02226
0.269108
0.466167
0.525911
0.795216
1.77258
0.588669
0.566931
0.561156
1.49599
1.35517
1.82198
4.5055
4.68398
2.30502
0.22171
0.148962
0.513055
1.31274
1.02586
1.61433
2.94958
1.54665
1.71349
5.46484
6.86695
1.63627
2.35442
0.570291
0.435134
0.372529
0.26097
0.201126
0.14389
0.180039
0.199571
0.179388
1.10865
0.252438
0.586559
0.105181
0.313637
0.425244
0.516921
0.272219
0.197461
0.122703
0.319259
0.363442
0.107138
0.390602
1.22563
0.15579
0.295814
0.569941
0.190179
0.472139
0.211567
1.13536
0.154383
0.144042
0.0607001
0.0473421
0.0135035
0.161862
0.471938
1.00944
1.01331
0.264837
0.277741
0.376849
0.133397
0.18993
0.0325325
0.385184
0.165126
0.136407
0.229692
5.2367
0.181241
0.460489
0.234764
0.209308
0.349634
0.317302
0.298675
0.2561
0.749128
2.35055
0.472593
1.84423
4.53839
1.62738
3.66254
1.47461
1.72669
4.92437
0.833174
3.72299
0.821725
4.40569
1.04655
1.32609
2.86813
0.545893
0.327144
1.22905
0.894574
0.988361
0.995189
3.70512

## Sheet: Fig. 5 E
relative fraction FYVE-Rab5 positive organelles
Pclowt/wt	Pclogt/gt
1	0.225641
1	0.877419
1	0.322581
1	2.1642
1	0.888889
1	1.21459
1	1.37843
1	3.29546
1	0.201581
1	0.571429

## Sheet: Fig. 5 F
relative fraction FYVE-Rab5-EEA1 positive organelles
Pclowt/wt	Pclogt/gt
1	0.495238
1	0.456989
1	0.0579937
1	0.537338
1	0
1	0.134387
