# Supplementary material for: Critical role for Piccolo in synaptic vesicle retrieval
Source: eLife. 2019 May 10;8:e46629. doi: 10.7554/eLife.46629 (PMC6541439; doi:10.7554/eLife.46629)
Supplement: Figure 6—source data 1. [file elife-46629-fig6-data1.xlsx]

## Sheet: Fig. 6 C
norm synaptophysin intensity
Pclowt/wt	Pclowt/wt + Rab5S43N
0.660868	0.562037
0.638757	0.366887
0.785062	0.465677
0.475489	0.322749
0.981543	0.322172
0.727638	0.921993
0.831066	1.3344
0.604981	0.985922
0.692201	0.802108
0.663338	0.587167
1.09063	0.826511
1.3816	0.506109
0.891331	1.181
0.936705	1.27806
1.181	1.15257
0.90238	0.432024
0.792308	0.646594
0.90905	0.640391
1.5025	2.2619
0.832123	1.91538
0.785034	0.619845
1.95758	0.5514
2.37218	0.816024
1.39718	0.625019
0.852751	0.853863
0.873352	0.941824
0.990299	0.674469
0.93713	0.389354
0.740361	1.26177
0.748787	0.467118
1.39997	0.567568
1.15401	0.694493
0.735255	0.65627
0.764653	0.420755
0.563972	0.643945
1.03843	0.532954
1.05932	0.592395
1.2779	0.486551
0.97324	0.62108
1.25649	0.960599
0.740209	1.30311
1.70041	0.79025
1.20092	1.96539
1.20338	0.705335
0.94395	0.672272
1.144	0.688879
1.19786	0.771557
1.04354	0.615577
0.57169	0.970097
0.681269	0.84674
0.707893	1.29274
0.751156	1.05139
0.764289	0.753303
0.726286	1.05625
1.12539	0.845505
0.751659	0.396861
1.02224	0.68667
0.865881	1.2217
1.66528	1.37768
0.65286	0.646361
1.09988	0.627964
1.22244	0.771639
0.933949	0.813485
0.667957	0.406715
0.652195	0.480169
0.621853	0.48135
0.973559	0.859051
0.95218	0.496707
0.778445	0.609062
1.27793	0.890378
0.723461	0.422957
1.2959	0.866433
0.921579	0.788981
1.01231	0.691919
0.727942	0.982212
0.800393	0.803803
1.09884	0.639158
0.932651	0.890166
0.918869	1.03195
0.996499	0.779858
0.697017	0.67562
0.878089	0.979437
0.769322	0.85067
0.674517	0.694679
0.935394	0.677552
0.995443	0.647163
1.08241	0.552259
1.23231	0.657601
1.40783	0.540603
0.666075	0.277306
0.6201	0.589013
1.35713	0.721514
1.2164	0.657764
1.37554	0.427909
0.999291	0.753884
0.712309	0.919583
0.610766	0.544045
0.790296	0.365895
0.878869	0.331512
1.54028	0.583737
1.46739	0.905249
1.16835	1.19926
0.863414	0.675702
0.934178	0.627211
0.907943	0.3532
0.855508	0.522811
0.582974	0.486999
0.7008	0.394045
0.807163	0.446025
0.546578	0.531171
0.710345	0.42466
1.30997	0.8583
0.875605	0.764533
1.0376	0.470018
0.561448	0.440635
0.908949	1.01961
1.11775	0.931871
1.58485	0.875378
1.01252	0.421528
0.856394	0.528201
0.844013	0.89205
1.0044	0.926985
0.990751	0.689533
0.887293	0.427324
1.61108	0.539938
1.01552	0.457925
1.47923	0.85197
1.32137	1.0059
1.48173	1.0615
1.57415	0.599647
0.94731	0.344451
0.691724	0.413932
1.06814	1.20176
1.12812	0.917829
0.962327	0.825865
0.872114	1.08304
0.88239	1.03942
1.26468	0.875994
0.736059	1.33213
0.708008
1.0766
1.11359
0.68627
1.64546
0.856433
1.23452
0.886547
1.48498
1.27721
1.75855
1.32679
1.29355
0.853089
1.08509
1.12093
1.62259
1.15307
1.84022
1.66939
1.03978
0.818641
0.719371
1.12234
1.48785
0.776984
0.958106
1.03181
0.898592
0.938106
0.464726
0.748056
0.404661
0.806855
0.725686
0.599175
1.077
0.995606
0.966872
1.16441
1.07054
0.745328
1.4936
0.892505
0.957051
0.918592
1.08694
0.58049
0.741124
0.792861
0.811928
0.865265
0.685231
0.753494
1.24376
0.643997
0.834323
1.34171
1.17197
1.43618
0.915573
1.09863
0.806578
1.65121
1.5846

## Sheet: Fig. 6 D
norm Rab5 intensity at PI3P organelles
Pclowt/wt	Pclowt/wt + Rab5S43N
1.08671	0.713479
1.08274	0.825339
0.693233	0.832718
2.0575	1.02916
1.88389	0.918087
1.74935	1.63097
0.539365	0.781155
0.632494	0.822153
0.804303	0.503289
0.910865	0.70717
0.899606	0.885762
1.0658	0.484902
1.82731	1.92706
2.34861	0.731298
0.739528	0.825465
0.751796	1.44616
0.73773	0.795001
0.939375	0.659078
1.81281	2.6781
0.933099	0.688692
2.40326	0.532776
2.02126	0.662958
2.05355	2.64622
2.89324	2.52184
0.650281	0.672546
1.03575	2.21899
0.411266	1.60839
2.73414	1.45998
1.13812	1.11992
1.6613	1.35856
1.40539	1.34503
1.33083	0.95902
1.11822	1.15278
0.985859	1.57064
0.856086	0.944388
1.04537	1.07463
0.637664	1.30867
0.496981	1.53232
0.707675	2.14649
1.30747	2.25939
1.44178	1.77436
1.28996	2.56075
1.69653	2.21395
1.73182	1.32497
1.40867	0.92184
1.31425	1.1817
2.502	1.04423
1.90167	0.998662
2.01688	0.853753
0.75766	0.662232
2.05163	1.2904
1.22402	1.7579
0.296788	1.03978
0.28717	0.952777
0.169191	0.924362
0.408774	0.841737
0.227471	0.856936
0.464308	0.535329
1.37044	0.811147
1.21954	1.38659
2.02959	0.456425
0.807426	1.10746
0.780776	1.03594
1.42604	1.05899
0.550687	0.89661
1.22166	0.539681
0.473959	0.812818
0.627824	0.817549
1.16697	0.865989
1.64156	0.648734
1.35137	0.624262
0.665952	0.669358
0.167205	0.628645
2.06749	1.44083
0.801274	0.863055
2.80361	0.864378
1.02957	0.474274
1.57234	0.387297
1.21727	0.750691
0.641448	0.560022
1.25578	0.446585
1.12786	0.245983
1.15593	1.72737
0.90604	1.36716
1.63869	2.36775
0.174997	0.960913
0.0994676	1.07429
0.53388	0.441856
0.525334	1.71422
0.68434	0.463175
0.774912	2.55971
0.257748	0.9272
0.300857	1.5298
0.774881	0.744574
0.511142	1.51923
0.241443	1.81372
1.66553	1.39063
0.579323	2.44255
0.692635	0.424037
0.439019	0.523661
0.372981	0.505589
0.396319	0.602848
0.291838	0.414797
0.589289	1.25158
0.222049	2.67312
2.28547	1.62627
1.43194	1.54679
2.99082	0.607233
1.10636	0.742239
1.14572	1.89578
0.654696	2.47545
1.25729	1.74096
0.850191	0.676643
0.72168	0.194359
1.50687	0.317066
0.892007	0.540627
1.21443	0.633597
1.9369	0.844229
1.83106	0.615937
1.21503	1.04496
0.523219	0.952365
0.968198	1.79044
1.33317	2.03271
1.54014	1.21122
1.61066	0.770181
0.785855	0.619941
0.733568	1.13124
1.69104	1.42317
2.0265	1.8023
2.47851	1.28958
1.66291	1.77197
1.39671	0.767563
1.17284	1.198
1.1875	0.857315
0.234694	0.698403
1.42134	0.779706
1.63874	0.658889
0.2574	0.66179
0.268972	0.70941
0.205239	0.560623
0.193034	0.824612
0.127059	0.937229
0.179662	1.31592
0.291333	1.41292
0.105582	1.37404
0.20221	0.852491
0.232013	1.68713
0.194043	1.05814
0.125956	0.894686
0.150112	1.01184
0.305177	0.81635
0.324478	2.29515
0.249042	0.927011
0.163895	1.16029
0.572858	1.67988
0.513917	1.29141
0.627951	1.71072
0.842588	1.2419
0.76873	1.80852
0.458507	1.71529
0.384616	2.34908
1.62624	2.34148
1.56045	1.02471
0.299184	0.739056
0.576168	0.236365
0.465729	1.22721
0.511236	0.609346
0.157556	1.27732
0.246583	2.12429
0.703765	1.62601
1.53702	0.666836
0.125987	0.365979
1.11292	1.19056
0.465792	1.30066
1.48117	0.539398
0.627322	0.727229
1.24468	0.358537
0.863969	0.442677
1.36789	0.167931
1.5994	0.542142
0.926665	0.619784
0.867753	0.886613
1.00301	0.93316
0.626469	0.69626
1.30236	0.649713
0.811303	2.00123
1.31377	1.3062
1.04483	0.967789
1.84308	1.34764
1.3028	1.68543
1.54226	2.18478
0.235703	2.70292
0.68207	0.477712
0.507641	0.939721
1.1091	0.993838
0.666081	0.435202
0.899828	0.269856
0.882579	0.273137
1.04559	2.60976
0.934929	2.20512
1.99442	1.51293
1.05278	1.40886
0.844072	2.32994
0.157556	2.17904
0.466708	0.971573
0.746467	0.547062
1.1186	2.11842
0.815468	1.56887
0.842537	2.34993
0.540002	1.83059
0.703823	1.40627
0.433687	1.64778
0.209121	1.40334
0.648047	1.36776
0.616786	1.36862
0.20438	1.62393
0.0599241	2.13347
0.605668	2.05437
0.19317	1.93059
0.158309	2.56943
0.28267	1.65333
0.335302	0.446683
0.395226	1.22213
0.148876	0.970816
0.443485	2.44937
0.211445	2.16485
0.142041	0.784436
0.152659	1.57026
0.0739162	2.57823
0.196726	1.56897
0.322725	2.21751
0.260707	2.39099
0.260795	0.606634
0.452871	0.87135
1.55807	2.88744
1.35538	2.56337
0.715398	2.01817
0.902414	1.4028
1.03789	0.453691
2.49776	0.539773
2.61232	0.634922
1.5937	0.446038
2.16615	0.565613
2.00775	0.831828
1.36896	0.732804
1.76664	0.639343
0.669736	0.586208
1.35182	0.733034
1.01351	0.604847
1.68553	0.835155
1.45599	1.2343
1.43148	0.211992
1.783	0.435737
1.67673	1.99121
0.782431	0.274557
2.78526	0.270775
2.03559	0.526331
1.95393	1.56591
2.47712	1.71852
1.22833	2.13849
1.90654	0.936819
2.95309	0.231131
0.998841	0.751626
1.1083	0.898952
1.29541	0.446491
1.32225	0.365742
1.28146	1.28406
1.14225	0.994784
1.3309	0.800932
0.486276	0.763839
0.98189	0.627584
0.904829	0.703185
1.12101	0.256239
0.601065	0.376816
0.849464	0.692429
0.554356	0.685596
1.32899	0.510197
0.677713	0.295064
1.48931	0.415048
0.337352	0.896626
0.132152	3.17903
0.411265	2.18379
0.684549	0.866598
1.47659	1.75151
1.26574	0.752356
1.03416	0.891296
0.729251	0.798926
0.303129	0.740961
0.366883	0.514162
0.783525	0.540593
0.420107	0.468501
1.59885	0.902823
0.67288	1.6879
1.61599	2.13958
1.00271	0.789811
0.50883	0.72884
0.43109	1.02605
0.139899	0.937731
0.371119	0.700041
0.206747	0.479801
0.754494	0.648091
0.752079	0.821892
0.490876	1.78933
0.64777	1.48302
0.663995	1.50498
0.744196	0.881451
0.764521	1.70813
1.97986	1.21475
0.967989	0.584019
1.1401	0.651782
0.352709	0.712115
0.301532	0.679078
2.33462	0.240791
0.834057	0.560459
0.323269	0.548064
0.296794	1.18321
0.979836	1.0322
1.20081	2.96339
1.06223	1.77184
1.46465	1.98526
0.754041	0.396591
1.68585	0.241976
1.10083	0.542826
1.13054	0.483858
1.18663	0.732075
1.73547	1.32899
1.29468	1.39912
0.466268	0.944611
0.891023	0.574951
1.96779	0.634328
0.350979	0.838937
1.29085	0.815651
0.995788	1.00303
1.15022	2.67028
0.855341	1.03762
1.44273	0.447173
0.789449	0.8136
1.03534	0.535261
0.781019	0.614095
2.96863	0.857938
1.84612	0.281802
4.7036	0.542643
1.855	0.762289
1.96478	1.16412
2.088	1.1911
1.58715	0.561053
-0.0334774	0.757003
-0.0337226	0.330243
0.349288	0.940055
0.322539	0.614142
0.0976557	1.14225
0.071863	0.545423
-0.0358639	1.18864
0.584246	0.319945
1.66908	0.656568
-0.066807	1.01019
0.183005	0.626398
0.0312606	1.14088
1.61499	0.759462
0.684134	1.43813
0.969718	1.50813
1.76272	0.644764
0.819339	0.510606
1.05616	0.425392
1.64675	0.710678
1.08569	0.636196
1.30698	0.985487
1.01292	0.345873
1.94974	0.632687
1.4143	0.713118
1.1443	0.858894
0.305041	0.518536
0.706965	0.633052
0.881951	1.1319
1.54567	1.05826
1.27504	1.06214
0.779878	0.394405
1.02691	0.563695
1.3464	0.853473
1.05183	0.517033
1.92249	0.393311
1.06359	1.14617
0.622798	0.583611
0.890746	1.1787
0.430769	0.47251
0.0817018	0.877169
0.344018	1.21876
0.547664	0.363692
0.198679	0.310465
0.0339046	0.150697
0.495476	0.221878
0.516278	0.607897
0.138142	0.195355
0.158079	0.24717
0.199757	0.184146
0.980581	0.403153
0.274912	0.0962879
1.11728	0.184828
0.68962	0.624439
0.824588	0.41883
0.874402	0.556221
0.217395	0.68049
0.328973	0.621569
0.173124	0.349244
1.25204	0.991228
0.332644	0.670974
0.473159	0.578688
0.66032	0.12864
0.700558	0.317673
0.459267	0.68595
0.896862	0.439399
0.564363	0.907949
0.386848	0.922706
0.628934	0.620515
0.669534	2.62717
0.481151	1.30783
0.164919	3.2736
0.283043	1.25895
0.699266	0.684365
1.02126	2.00774
0.66032	0.918533
0.845395	1.33583
1.15335	0.0426167
1.30625	0.1737
1.39493	0.210054
0.798531	0.474888
0.446238	0.488994
1.73967	1.18387
2.13306	0.447103
0.95294	0.468048
2.67295	3.56564
1.88083	0.622601
0.786153	0.72806
2.93513	2.88898
0.517505	1.29588
0.420177	0.528586
0.917093	0.747784
1.12887	0.913278
0.475032	0.336533
1.02917	1.33986
0.940562	0.881962
0.999878	0.461571
0.614177	1.35231
0.972018	1.10951
1.34303	0.731656
0.559038	0.707616
0.654995	1.33748
0.478414	0.590425
0.700707	0.734393
2.45851	1.35217
1.37175	0.525422
0.797379	0.76038
0.308817	0.647937
1.31258	1.38334
1.82158	1.06711
0.789392	1.05293
0.786442	1.17242
0.796013	1.02637
1.13852	0.773264
1.68158	0.551047
2.48615	1.0093
2.02041	0.654345
0.864185	1.20827
0.735043	0.559252
0.273546	0.485398
0.377277	0.735689
1.06876	0.315224
0.33322	1.39212
1.25535	1.70245
0.840497	2.05079
0.678102	1.16544
1.73362	0.838699
0.975326	0.841217
-0.00403319	0.157145
0.164775	0.410749
-0.00561269	0.871958
0.0167735	3.26
0.0578752	1.43344
0.040312	0.61065
0.604889	0.524553
0.172836	0.726326
0.434069	1.87377
0.473661	0.714813
0.91385	0.876056
0.941923	0.629654
1.27802	1.07366
0.937964	0.708187
0.645995	1.03565
0.697319	0.922418
0.468262	1.42106
0.703796	1.00326
0.872817	0.840284
0.763688	0.678961
0.111216	0.0753689
0.835605	1.05365
4.96957	0.980938
0.553783	0.461065
0.43702	1.42466
1.13297	1.31718
1.3914	1.96815
0.270447	0.937964
1.60066	1.31596
1.28746	1.19474
0.875554	0.704228
0.636349	0.934224
0.457608	1.8922
0.690698	0.314067
0.742166	2.09757
0.616983	1.48023
0.746919	2.60399
1.21921	1.89047
1.8087	2.0641
0.425357	0.555149
2.66511	1.43834
0.816671	1.2809
0.88664	2.24968
1.61045	2.70621
2.19922	1.83627
0.595029	1.4613
0.706895	1.17322
0.765203	1.02255
1.21554	0.492809
0.642181	1.30041
-0.067089	0.51973
0.220564	2.15841
0.697468	1.97621
-0.0420355	2.58722
-0.053554	2.50177
-0.083932	1.79027
0.25188	2.51221
0.36101	1.08136
0.0558636	1.56323
0.207823	0.52945
0.378717	1.41343
0.161248	0.625765
0.177664	0.94905
0.0753689	1.93777
2.03416	0.893768
1.40242	1.43114
2.14329	1.09842
2.08253	1.29285
0.199762	1.1486
0.851877	0.892546
2.39387	1.02637
0.234456	0.104525
0.220276	0.226107
1.02601	0.225531
0.920982	0.223589
0.371446	0.905217
0.885851	1.7329
0.82056	0.106755
0.635197	0.338261
0.777729	0.845181
0.499077	1.17509
0.395416	0.966112
1.04436	2.90914
1.64947	1.52162
0.26397	2.24076
0.0205186	1.43531
0.0221031	0.693221
0.0863857	0.40686
0.437382	1.53926
1.64875	1.07762
0.333577	0.371487
0.11057	0.799712
0.135186	1.03427
0.195585	0.96528
0.167506	1.39811
0.488492	1.47349
0.334586	1.33062
0.771754	1.23725
0.850794	0.857269
0.722586	1.55102
0.645563	0.438874
0.478558	0.911615
0.710854	1.07431
0.772613	1.86525
0.700344	3.21076
0.993972	8.98125
0.576169	1.80705
1.07683	0.792374
1.32452	0.706415
1.89465	0.495477
2.08253	1.04626
1.18617	0.564948
1.3842	2.19574
0.747063	1.11893
1.11174	0.66753
1.1383	1.12224
0.961721	2.45703
0.800116	1.63875
1.63457	0.924144
0.31443	0.563546
0.89053	0.805584
0.718841	0.661283
0.788235	0.996755
2.52459	1.23555
1.16537	1.21257
0.959923	1.19284
1.18696	1.457
2.29575	1.15567
1.00714	1.01871
1.47296	0.351211
0.515339	2.12016
1.10432	1.35131
0.568823	0.275185
0.107977	1.43491
0.206671	2.02973
1.22109	1.73116
0.9258	1.56822
1.04667	0.344109
1.68719	1.05383
1.13542
2.12601
1.80193
0.961145
0.603741
2.16099
1.09698
25.5568
0.973453
0.947829
1.47678
1.0178
2.91029
2.19951
1.9608
3.9468
2.35866
3.71357
1.79502
1.13665
0.875341
1.08827
0.955388
0.79342
1.10022
1.04026
0.836181
0.227691
2.85465
1.44733
1.88342
1.64083
0.363672
-0.0273531
0.03009
0.075657
0.069036
0.0961756
0.259926
0.181136
0.167003
0.380978
0.921993
0.769604
0.771891
1.96036
1.0749
1.64322
0.845286
0.45417
0.771241
1.0933
1.02649
1.17707
1.54115
2.18629
1.29509
1.52395
0.778375
1.18974
1.1021
0.979107
0.282319
1.95265
0.81388
0.266208
0.849281
0.728535
2.34585
1.60714
1.22138
0.627453
1.3875
1.04735
1.14918
1.92076
1.40672
1.92899
1.33598
1.37886
1.0837
0.876659
1.13273
0.777692
0.739083
0.678796
1.18434
1.50568
1.11856
0.388011
0.462806
0.845934
0.332843
0.279759
0.637285
0.743726
0.446249
0.352712
0.285153
0.55508
0.846685
1.52108
1.39043
0.248353
1.17434
1.0608
0.857848
0.54856
1.07166
1.25102
0.393064
0.601441
1.24917
0.714197
0.752637
1.46277
1.92746
1.4171
1.10217
0.648073
1.00614
2.15672
0.767795
0.450757
0.967499
0.793705
1.05138
0.599256
0.5092
0.580753
0.593247
0.606117
0.184413
2.17021
1.62899
1.09125
3.78257
2.26743
1.08548
1.80982
0.670364
0.442221
0.293619
0.77056
0.959342
1.52022
1.50889
2.32711
2.63732
2.09794
1.49978
1.04097
1.33568
1.77424
2.6747
2.13665
1.34855
2.27034
1.35176
0.992011
1.07483
1.36442
1.4726
1.9323
2.35346
1.28058
1.15126
0.628339
1.54712
0.66374
0.379543
0.732905
1.01864
0.32086
0.830571
0.993888
1.54945
0.730686
1.19233
1.41614
0.815859
0.699313
1.08234
0.695523
1.07991
1.06387
0.945958
1.26286
1.07961
1.18263
0.547978
0.400606
0.556206
-0.222134
-0.165091
0.571022
0.498548
0.508243
1.58877
1.48615
1.53873
0.713992
1.26866
1.12443
1.39794
1.18987
1.29382
0.702453
0.949508
0.144779
0.805516
0.727475
1.66207
0.933088
1.03086
0.49155
0.192572
0.328815
0.422183
3.03185
2.60133
0.66019
1.09517
1.77103
0.554911
0.49073
0.0536302
1.0228
0.581912
1.22039
1.73652
0.584303
1.93418
0.244528
1.52429
0.940496
0.251665
0.691189
0.511145
0.317551
2.10822
0.322535
0.429694
0.755744
0.731847
0.190933
0.350391
0.683986
0.189706
0.400097
0.530809
0.789814
0.509986
0.301404
0.548902
0.536785
0.41358
0.521182
1.11641
0.378043
0.447104
0.878845
0.440037
0.761821
0.508347
0.820947
0.555356
0.405522
0.0680695
0.0353326
-0.584885
0.0125949
-0.0229073
0.492881
0.688762
0.512135
0.756015
1.08087
1.53808
1.52569
0.616971
1.12078
1.27788
1.40754
1.43809
0.948349
0.501961
1.91892
0.502611
1.23094
1.24821
1.13781
0.867475
1.18079
1.06022
0.970434
0.516982
1.11508
1.52511
1.42423
2.07626
1.36377
1.35493
1.49073
0.888675
1.27727
1.24142
1.23995
0.783666
1.30782
1.5926
1.79739
0.422251
1.10661
1.33731
1.19581
1.04868
1.91878

## Sheet: Fig. 6 E
norm Rab5 intensity at PI3P organelles
Pclowt/wt	Pclowt/wt + Rab5S43N
2.82536	0.683387
1.48603	0.377862
1.9838	0.354051
3.7365	0.530623
2.87441	0.337644
0.552142	0.791312
0.621365	0.186026
0.0879616	0.58958
0.512255	0.0384168
2.2537	0.0970852
1.84683	0.136318
1.24343	0.051549
2.44283	2.14475
1.12351	0.517243
0.0309305	0.347459
0.145074	1.02802
0.320828	0.154562
0.176126	0.193634
3.22719	6.15114
0.231356	0.115248
0.84368	0.0967944
1.97034	0.0811273
1.34685	0.286299
5.70745	0.316695
0.228082	0.115982
0.510905	0.665671
-0.013787	0.380273
0.900669	0.591211
2.83006	0.456491
1.52797	0.982163
0.555375	0.314364
2.36056	5.37771
0.218958	2.39325
1.22898	0.405803
0.72074	1.57972
0.462055	0.221781
0.501494	2.37549
0.581475	2.29837
0.168188	1.49528
0.542979	1.79802
1.28966	0.371804
2.2008	2.30705
1.9165	0.233073
6.49038	0.190402
1.40883	1.15309
1.40126	0.546087
1.50996	1.51757
1.4432	1.09729
0.991247	1.82854
0.089023	0.596081
1.77217	1.51005
0.558034	0.532382
0.622099	1.07417
0.0898811	1.72242
0.0774858	0.184143
0.10862	2.00516
0.0924584	0.502558
0.173913	0.0803087
1.25922	0.490897
0.749909	3.0304
0.75081	0.153213
0.180584	0.15395
0.133371	0.805303
0.441598	1.30868
0.28548	1.90456
0.333142	0.599519
0.177843	0.37074
0.639937	0.305158
0.764636	0.143598
1.09197	0.721434
0.8051	0.344597
0.313915	0.175593
0.0494205	0.620301
2.75507	0.675695
1.59923	0.874975
1.39058	0.248906
1.88795	0.223907
5.99842	0.0317463
0.729779	0.262366
2.06362	0.264082
1.77683	0.0677496
1.12973	0.0236051
0.42057	0.632287
1.67013	0.0675435
1.0567	0.374955
0.0433259	0.09704
0.148182	0.333102
0.206808	0.15898
0.426789	0.965677
0.163934	0.115369
0.293991	2.58549
0.0245479	0.442662
0.113162	0.249722
0.0834195	0.669558
0.0963879	2.12466
0.515323	2.5132
0.674755	2.00168
0.080145	5.23255
0.35	0.248946
0.546211	0.32406
0.179438	0.289161
0.150472	0.136357
0.171951	0.234464
0.164259	0.326556
0.0177137	3.5965
1.54004	1.76353
5.83166	1.59285
1.16651	0.168719
0.362232	0.253282
1.52187	1.85133
0.148837	5.27301
0.500226	2.21532
0.452768	0.713172
0.198258	0.0693445
2.01641	0.0610819
0.256435	0.148877
4.11599	1.06685
0.534714	1.03437
0.554068	0.107555
0.186927	0.15485
0.229841	0.268133
0.483125	4.04464
0.727981	2.10429
0.59367	1.41124
1.37193	1.87064
0.478707	0.944607
0.669764	0.774251
5.57948	0.825105
1.17625	2.32676
2.99358	0.837868
1.13125	4.42978
0.517819	0.203534
2.3586	0.214252
0.724709	0.715543
0.0536774	0.128052
6.11845	0.22481
2.27041	0.47036
0.113286	0.493556
0.0891077	0.0686501
0.0959391	0.229186
0.0710637	0.213558
0.0569915	0.472201
0.0792868	1.16598
0.0965121	0.741725
0.0994169	4.21054
0.21364	0.662072
0.0830921	1.79442
0.0605512	0.42953
0.0407486	0.704539
0.0712274	1.71276
0.0869368	2.13919
0.081579	8.98729
0.0812911	0.342757
0.0550691	0.561593
0.602627	1.71485
0.198258	1.76632
0.134802	1.47834
0.730843	0.882913
0.417544	0.560899
0.145523	0.726959
0.112382	3.50367
1.94792	2.68691
4.90452	1.33621
0.0777314	0.222272
0.177925	0.0773644
0.770364	0.478501
0.464757	0.0155881
0.0223376	0.373032
0.0649267	1.72352
0.869944	0.819132
0.548543	0.211308
0.0740898	0.205826
0.601769	3.23414
0.837992	1.02537
0.646198	0.248864
2.08629	0.219735
0.968991	0.0641899
0.280777	-0.00818359
3.77634	0.232336
0.620711	0.113529
2.34591	1.66792
1.11014	1.52907
1.91855	4.6332
0.337071	0.143477
2.25312	0.335392
0.598904	2.26441
0.631183	0.292517
0.717056	0.869738
1.55677	2.04431
1.02295	0.491185
1.61494	0.204598
0.0972884	0.659003
0.31907	0.203986
0.265965	0.0583409
4.77868	0.0596479
0.055885	0.0140722
0.168064	-0.0120284
1.55644	0.0133777
0.432395	3.09881
0.351389	2.5062
0.801867	0.37708
0.527637	0.17056
0.0965093	2.32889
0.235611	1.81983
0.0262643	1.59359
3.69775	0.0958967
0.621401	1.72782
0.367037	0.193798
2.16045	0.676677
0.343315	1.2719
0.53766	0.723317
0.331701	5.00525
0.170263	4.47761
0.152236	0.228285
0.25231	0.768851
0.206694	0.855542
0.0461083	2.42417
0.254489	3.42168
0.0775708	0.178825
0.109877	1.63327
0.0232378	2.39206
0.0494983	0.47392
0.105401	0.582785
-0.0194804	0.116476
0.0458661	3.80621
0.0770865	0.90881
0.0868893	0.365464
0.107221	1.09033
0.107823	1.94899
0.0951139	0.308105
0.169295	0.675246
0.167357	0.37336
0.128397	1.44921
0.307736	0.124002
1.61565	2.81099
0.822041	3.74296
0.205116	2.98822
0.390509	1.23275
1.89519	0.11097
1.6021	0.0354621
2.5777	0.0187623
2.36363	0.0761179
0.776184	0.074665
3.19839	0.0745481
4.01898	0.0166998
1.27463	0.128881
0.121132	0.0730952
0.233439	0.0231126
0.697644	-0.00810777
1.94831	0.178981
6.54585	0.842741
4.67124	0.00895946
2.92877	0.0757588
1.86784	0.719671
2.35891	-0.0504586
2.62538	-0.00108549
3.66235	0.062566
1.91334	1.24838
4.69616	2.44835
0.520843	1.03261
3.14852	0.395235
1.50504	0.0280808
0.508018	0.111338
1.51061	0.436016
1.92932	0.0595433
1.19452	0.0386017
1.21607	0.220246
2.05759	0.811395
1.74271	0.817081
0.849629	0.184299
1.17649	0.45477
1.08875	0.181644
0.981901	-0.0973016
0.692192	-0.0665572
0.44799	0.0977776
0.540198	0.0913648
1.79814	0.0192382
0.336176	0.112173
4.32683	0.148478
0.48756	0.302409
0.213466	1.30803
0.29684	0.213833
0.434438	0.293458
0.759358	0.394024
0.646451	0.0889434
0.864392	0.219519
0.368966	0.133482
0.170263	-0.0498574
0.151868	0.0331575
0.776175	-0.0532391
0.287763	0.0285651
0.490708	-0.0182696
0.374051	0.0883422
1.03163	0.134208
0.546135	0.0252919
0.373809	0.160586
0.538503	0.313673
0.457793	0.23247
0.100566	0.0324311
0.214685	0.221214
0.0749071	0.100441
0.35893	0.317907
0.0722519	0.41859
0.182371	0.222667
0.185761	0.228111
0.315969	0.374294
0.409998	7.48807
1.81763	0.411568
0.55461	0.0945127
0.430572	0.446545
0.0629333	0.51939
0.0150132	0.248201
2.25787	0.148604
0.30048	0.468205
-0.0176601	0.00605369
0.142074	0.110486
1.14491	0.212748
0.991219	0.382401
0.562835	0.551462
1.05923	0.956901
0.444842	0.0557942
3.19342	0.0574809
2.23996	0.118961
1.643	0.10758
1.29521	0.098145
0.733465	0.157922
2.17655	0.134325
0.0860459	0.0991136
1.37326	0.121867
0.486475	0.202703
0.447147	0.234649
1.33757	0.165303
1.17432	0.224964
0.744479	0.665697
0.520117	0.110854
0.749798	0.156594
0.762874	0.135536
0.838023	0.157438
0.709985	0.163617
3.14538	0.187815
1.26774	0.179949
1.53554	0.132146
1.65571	0.147643
1.31373	0.181402
0.929388	0.168451
1.2151	0.235977
0.0933104	0.163976
-0.0608709	0.154657
-0.0114978	0.317539
-0.0337671	0.123069
0.00556105	0.115087
0.00956066	0.132146
0.107213	0.262847
0.622128	0.169303
2.29599	0.140011
0.0102788	0.204398
0.088576	0.317907
0.164577	0.36232
0.77944	0.214676
0.924537	0.150182
0.171232	0.206327
4.37027	0.141347
1.95364	0.221457
0.859674	0.158648
0.483085	0.255791
0.951524	0.137356
0.508619	0.160344
1.12397	0.277852
0.914734	0.119688
4.25567	0.161922
0.300355	0.317297
0.677187	0.131904
0.182604	0.106737
0.104675	0.148244
1.00913	0.160469
0.674765	0.423792
0.490708	0.0960909
2.92985	0.0697051
2.53426	0.165186
2.52591	0.100441
2.83316	0.136989
0.725474	0.111814
0.559319	0.130217
0.419425	0.262121
0.254731	0.0957235
0.0117655	0.238282
-0.139686	0.234524
0.660953	0.0608709
0.368147	-0.00822467
0.262487	0.0272291
-0.015605	0.0519198
0.205434	0.276032
1.02514	0.0432025
0.0724026	0.138684
0.169493	0.0256593
0.979346	0.133482
-0.00652268	0.0789067
0.157851	0.0862881
1.23377	0.067768
1.30362	0.171482
1.60333	0.0803596
1.08641	0.418949
1.21817	0.202577
1.6032	0.143402
4.26402	0.149455
2.2456	0.0104857
0.444001	0.150816
1.23108	0.0295507
0.400002	0.0385006
1.54666	0.272081
0.267606	0.715703
0.296645	0.143393
0.298304	2.03927
0.369427	0.752032
1.1473	1.25411
0.230633	0.249442
0.900801	0.63345
0.510137	3.31321
0.382861	1.49383
2.01637	1.5276
1.44138	0.0583334
0.834921	0.00792607
1.76527	0.00511929
1.20435	0.0223836
1.96904	0.0115096
0.269389	0.167568
0.326575	0.207102
2.38235	0.217331
0.713523	0.12446
0.286407	0.1544
7.03679	0.672719
5.37167	0.223342
4.94071	0.803967
5.89051	0.343204
2.69255	0.220015
0.416763	0.380937
3.0511	2.89875
1.13464	0.0285268
0.335146	0.0717583
0.289478	0.297404
0.374035	0.8156
0.408961	0.132139
0.504382	0.454107
0.726833	0.702525
0.387336	5.49408
0.440806	0.629734
0.231409	0.19546
0.449632	0.160022
0.290378	1.18004
6.13458	0.210553
3.31859	0.324784
3.17967	0.37505
1.46224	0.19929
1.99822	0.28999
3.23671	4.58945
0.814461	0.528937
1.71743	0.350618
3.52313	0.59149
3.86352	0.194948
4.94046	0.171152
7.86493	0.178443
4.81728	0.254429
0.231533	0.533545
0.164373	0.0143252
0.244199	0.702137
0.410876	4.83978
0.368147	0.0171408
0.168345	2.58868
1.10138	0.613105
0.8623	0.066383
0.645992	-0.0408131
3.91238	0.0278825
3.05725	-0.108096
0.0176527	-0.039904
0.122166	-0.0564093
-0.00370707	0.292682
0.0289152	0.749605
0.030954	0.373267
0.0358174	0.40844
0.0992612	0.0983698
0.0995172	1.60704
0.102077	0.212345
0.092871	0.257377
0.173712	0.215284
0.32338	0.497471
1.35568	0.392967
0.435819	0.338597
0.284491	0.336681
0.322992	0.354467
0.228973	0.584331
0.52869	0.114107
0.672207	0.164506
0.602496	0.0730381
0.184965	0.11717
1.11698	1.06876
1.21215	0.221815
0.268374	0.237164
0.246626	0.402941
0.871126	0.755616
0.736171	1.01657
0.238435	0.702525
0.392199	0.350239
0.384909	0.348703
0.32594	0.237164
0.320176	0.54877
0.295365	1.10572
0.336681	0.145829
0.304448	0.973071
0.311862	0.447329
0.516148	0.573457
0.463702	0.946848
0.838504	1.72805
0.52613	0.0331342
2.56348	0.113595
0.454619	0.687688
0.266838	0.649444
2.21912	1.53029
3.19706	1.53144
0.210429	0.318905
0.0950422	0.523182
0.160154	0.245991
0.00498689	0.316981
0.101697	0.384776
-0.210685	0.416498
-0.199299	0.821752
0.459474	0.863324
-0.189581	3.07119
-0.197763	3.96905
-0.18651	2.0449
-0.174612	0.581516
-0.177551	0.197251
-0.193032	0.68692
-0.165662	1.12414
-0.147877	2.13509
-0.151072	0.342948
-0.117691	0.267862
-0.126129	0.344872
0.326955	2.47087
0.019568	0.495556
0.190084	1.69811
4.40511	0.0629319
0.0543615	0.502714
0.520499	0.784399
1.03178	4.07317
-0.00704343	0.0332577
-0.00218011	0.0872397
0.757399	0.0532141
0.674122	0.15823
0.0670274	0.0204683
0.620396	1.17851
0.0640794	0.0773895
0.56539	0.033902
0.120497	0.253661
0.145564	0.434795
0.238179	0.24727
0.0842917	3.70528
0.160401	1.11506
0.0125334	1.4891
0.117549	0.271949
0.131372	0.205054
-0.0245638	0.271057
0.0707344	0.580872
4.77032	0.829678
0.109367	0.204343
0.0599928	0.0765997
0.0807171	-0.0266818
0.0777691	0.335696
0.162705	0.468252
0.152096	0.224966
0.104248	0.759528
0.205945	0.336256
0.19674	0.63081
0.236899	0.753531
0.138274	0.0871605
0.238947	0.251294
0.884551	0.0723264
0.63473	0.960986
0.454619	0.414267
0.61247	2.02882
0.291393	1.33828
1.27125	0.136645
1.97084	0.405035
0.401538	0.201418
2.61478	0.175422
0.242151	0.345158
0.846051	0.197704
0.555549	0.251108
2.80487	0.149424
1.67484	0.586057
2.37596	1.61279
0.932011	0.659068
1.19617	0.577177
-0.00920589	1.10863
0.0638322	0.31777
0.32594	0.0471177
1.13425	0.471695
1.08859	0.971505
4.02034	0.724318
0.20787	0.826935
0.761247	1.15639
0.491461	0.916753
0.616565	0.731311
0.673751	0.268184
0.601216	0.299056
0.776084	0.746727
0.222963	0.318725
0.0599928	1.27807
0.137515	0.833909
0.308923	2.48996
0.0518107	3.86882
1.37947	0.0957715
0.0534701	5.18982
0.961049
0.414451
1.51365
0.984969
1.95011
6.58536
0.00562239
0.0871073
0.224878
1.0951
4.28244
1.9936
6.77033
5.7915
7.43857
0.885452
6.32939
1.60589
1.95075
0.47304
0.462545
1.2646
1.57761
1.00377
0.582028
0.325419
0.32376
0.374026
0.14838
0.236008
1.81067
0.322224
0.0515548
0.038121
0.0377415
0.0180411
-0.0134249
-0.0101062
0.0555826
0.0557487
0.076352
0.131769
0.244262
0.282146
0.85922
0.589958
0.366651
0.814074
0.427691
0.222747
0.22866
2.47305
1.24467
0.526678
0.544541
0.695087
1.00875
0.570746
0.561928
1.55362
0.651163
0.509602
0.11542
1.76807
0.111788
0.149715
0.47207
0.18206
0.653695
1.42874
4.22477
0.162621
1.46457
0.741851
0.214365
0.237518
0.645272
11.8677
0.533648
6.94675
0.106455
0.213037
0.126893
0.148386
0.178679
0.120024
0.177412
0.384805
0.928682
0.147556
1.75464
0.855402
0.284076
0.205027
0.899054
0.417753
0.112826
0.108842
0.208493
0.801665
0.273059
3.19432
0.49039
0.169487
0.30306
0.277063
0.126498
0.178553
0.340239
0.73324
0.116726
0.329575
0.265257
0.315902
0.376879
10.5045
1.67128
1.9495
0.571823
0.751912
0.44323
2.6026
0.471883
0.348767
0.62529
0.547424
0.460762
0.277187
0.300736
0.208201
0.281358
0.330384
0.16071
1.27873
0.966546
0.669254
4.34479
2.20889
0.423873
0.964347
1.02715
0.32111
0.203305
1.18512
0.668777
2.30896
1.35724
2.08503
6.74495
3.48619
10.2471
0.214405
0.588608
1.75593
2.04256
2.83673
0.299262
4.3061
0.409992
0.62419
0.91615
0.511158
4.35923
5.31885
4.96469
3.50327
0.637822
0.224654
0.855588
0.184633
0.0692757
0.413727
8.49238
0.167039
0.378954
1.11697
7.23748
0.421176
3.02118
0.860526
1.2649
1.34309
0.230837
0.594708
0.670479
1.04674
0.30308
0.200131
0.449537
4.45349
0.309928
0.139589
0.282706
-0.101684
-0.0715376
0.299387
-0.0262667
0.192641
0.114278
0.552528
1.16427
1.49673
0.715293
0.607634
0.553421
0.465949
1.28046
0.0526565
2.49498
-0.0383006
0.240029
0.412587
1.12624
0.54313
0.922438
0.425969
-0.0155198
0.289886
0.55757
2.55542
2.48355
0.72411
1.26417
0.731539
0.616825
0.433354
0.0459137
0.138221
0.729961
0.200214
0.422337
0.907831
7.44068
0.100397
0.826189
0.414329
0.123178
0.536615
0.103572
0.444475
0.66635
0.0663295
0.0974722
0.663964
0.651058
0.137327
0.0495442
0.0556857
0.425491
0.707513
0.511532
0.349908
0.216998
0.033071
0.2681
0.574646
0.561347
1.02831
12.2278
0.35053
0.59892
1.3288
0.536449
0.867
0.377171
0.767971
0.110606
0.193906
0.0304569
0.0939247
0.176312
0.0872435
0.050313
0.0772439
0.291151
0.151311
0.281046
1.01756
0.0662665
0.158241
0.243907
0.314699
0.361443
0.439018
0.608609
0.747971
0.227227
1.14091
-0.0172205
0.167163
0.155752
3.31333
0.159072
0.0483202
0.27588
0.0508312
0.0215768
0.491634
0.358517
0.547341
0.488377
0.278473
0.75571
1.22616
2.92611
0.890694
0.636078
0.751623
0.250796
0.655956
1.37664
0.970904
-0.0262252
0.0541926
0.183201
0.282146
0.461696
2.47313

## Sheet: Fig. 6 F
relative fraction FYVE-Rab5 positive organelles
Pclowt/wt	Pclowt/wt + Rab5S43N
1	1.44795
1	1.63615
1	2.03662
1	1.33333

## Sheet: Fig. 6 G
relative fraction FYVE-Rab5-EEA1 positive organelles
Pclowt/wt	Pclowt/wt + Rab5S43N
1	0.0765612
1	1.122
1	0.670886
1	0.714286

## Sheet: Fig. 6 I
norm FM1-43 intensity
Pclowt/wt	Pclowt/wt + Rab5S43N
1.14525	0.576681
1.30839	0.543299
0.996133	0.718809
1.05929	0.599851
1.2491	0.649575
0.969038	2.54104
1.02655	1.03086
0.814388	0.675216
0.835404	0.885343
1.07526	0.984576
0.884052	1.30656
1.2169	1.16218
1.14831	0.662153
1.17411	0.275603
1.21265	0.800249
0.852228	0.625277
0.670698	0.951353
0.878355	0.982154
0.691881	0.568513
0.770039	1.01274
0.956728	1.06289
0.70408	0.40182
0.904586	0.360749
0.764501	0.491965
1.14235	0.605496
0.587377	1.51922
0.539319	1.18148
0.897275	0.97495
0.948234	0.695909
1.03822	0.690375
1.16884	0.81799
0.62952	0.940389
0.894319	0.493846
0.967532	0.235553
0.8812	0.655217
0.976078	0.568888
0.860184	0.557545
0.76364	0.207653
1.14487	0.732139
0.808201	0.672794
1.17637	0.556737
1.19819	0.975273
1.04532	0.581413
1.14675	0.561039
1.02887	0.559749
0.757242	0.50024
0.641508	1.52346
1.3422	0.904693
0.820834	0.70951
0.461858	0.855778
0.870825	0.900339
0.411063	0.56378
0.875072	0.679244
0.433369	0.808954
0.651129	0.652368
1.04515	0.785787
0.528084	0.641831
0.782776	0.70349
0.993225	0.799225
0.698056	0.942214
1.04682	0.46444
0.618608	0.296348
0.852925	0.858463
1.23792	0.690802
0.913884	0.353705
0.537709	0.503734
1.15944	0.720904
1.66608	0.572649
0.951676	0.585389
0.689997	0.860399
0.736549	1.08482
0.986994	1.15422
0.876096	0.641081
1.00269	0.735904
1.08467	0.505941
0.367629	0.657101
1.32054	0.493846
1.19395	0.730689
1.45471	0.60501
1.4281	0.777457
1.10627	0.950063
0.923131	0.717789
1.24039	0.530992
1.15127	0.553999
0.972102	0.48385
1.36408	1.29651
1.36355	1.30823
1.48847	1.50191
0.965062	0.716765
0.941461	1.95974
1.47761	0.798903
1.27764	0.941676
0.885076	0.82352
0.868411	0.906948
0.950118	1.30517
1.0336	0.641994
1.18766	0.809492
1.28254	1.11127
0.678439	0.925175
1.22722	0.591357
0.889211	0.51126
1.15664	0.598775
1.21905	0.718753
0.569477	0.99554
0.493467	1.46955
0.478416	0.814548
0.472448	0.773317
0.738159	0.832555
0.863407	0.453528
1.20475	0.729454
0.928557	1.18137
0.505885	0.802504
0.443369	0.637587
0.662097	0.561254
0.192279	0.966887
0.693917	0.236361
0.594365	0.885773
0.588505	0.591895
0.649141	0.940441
0.662256	0.893188
0.796162	0.801484
0.823631	0.814169
0.931246	1.13912
1.17567	0.983014
0.971241	0.935441
0.868889	1.18169
1.214	0.747513
1.08681	0.901359
0.852065	0.956457
0.690746	0.990755
1.25829	0.86228
1.20185	1.47648
0.839324	2.09918
0.657364	0.663388
0.779604	0.511315
0.698487	0.834918
0.983871	0.923613
1.19658	0.66785
1.07069	0.601676
1.00183	1.03849
1.09197	0.842392
1.05451	0.920334
1.12121	1.01188
1.35102	0.719399
0.926625	1.01365
0.793473	1.11966
1.04892	0.855666
0.89206	1.23039
1.18405	0.954899
1.2233	0.820189
1.24356	1.47121
1.12369	0.932645
1.18755	0.999193
1.169	1.06504
1.64979	0.567489
1.1453	0.873192
0.984142	0.934473
1.5555	0.857443
0.831691	0.71612
0.962855	1.13906
0.836424	1.01994
1.14949	0.902327
0.794118	0.775628
1.3386	1.14009
1.31183	2.02048
0.553569	0.863463
0.80009	0.563673
0.440361	0.916199
0.954473	1.11289
0.647962	1.4925
0.239748	2.50734
0.988607	1.26356
0.381071	1.25512
1.50438	0.9835
0.548892	0.63048
0.957644	0.758136
0.945278	0.614703
1.53115	0.712881
0.693439	0.849084
0.93141	0.944495
1.36957	0.594467
1.07542	0.44877
1.31479	0.700751
0.805408	0.778311
1.19696	0.866115
1.11251	1.40527
0.805727	0.750529
0.710853	0.759329
0.712626	0.443306
1.58641	1.49377
0.960114	1.28132
1.02774	0.524258
1.32108	0.750278
1.06434	0.933181
1.37644	1.07642
1.43439	1.27146
1.04445	1.07448
1.30597	0.941854
1.16858	0.966366
1.15992	0.986416
1.47396	0.798738
1.33505	0.802572
1.38859	0.675107
1.32559	0.48592
1.5225	0.924949
1.09418	1.05292
0.91249	1.03683
1.45713	1.01074
1.20201	0.963916
1.25028	1.05053
1.44407	0.921237
1.71924	1.14657
1.302	0.561971
0.784497	1.01866
1.3085	1.0164
1.03816	1.80521
1.07757	1.01307
1.27716	0.665115
1.03053	1.34437
0.583238	1.57806
0.620974	1.15304
1.41026	1.73053
1.3551	0.736699
1.19239	0.892952
0.824221	0.785159
0.834973	0.429913
0.808687	1.07271
0.358813	1.37705
0.702036	0.655118
0.669459	0.777491
0.51212	1.19792
0.720689	0.980756
0.596839	0.546003
1.24233	1.06712
0.654356	1.24386
1.23114	1.67428
1.17422	0.287929
1.05768	0.695529
0.686503	0.867876
0.932482	1.22507
0.670428	1.10936
1.23168	1.01545
0.912486	1.60539
0.364135	0.987608
0.665001	0.672778
0.794711	0.489875
1.07499	0.433309
1.34043	1.09239
0.647743	1.16988
1.2698	0.703639
0.99452	1.12677
1.25867	1.26322
0.824544	0.535317
1.11686	0.650087
1.56394	1.24481
1.45665	1.33406
1.48971	1.06329
1.35677	0.871519
1.07004	1.42406
1.28297	0.604333
1.22448	0.373786
1.51766	1.09427
1.31377	0.529223
2.44106	0.780133
1.00328	0.661654
1.16379	2.13104
1.08429	0.776737
1.12525	0.897228
1.1338	0.452478
1.26996	0.496666
1.08235	1.14851
1.09896	1.04393
1.16825	0.994083
1.20486	1.18239
0.950278	1.14544
0.518034	1.06888
1.30797	0.776234
0.625198	1.76385
0.923687	1.28145
0.804393	1.19547
1.65693	0.616399
2.01991	0.95568
1.18353	1.10829
1.23419	0.794149
0.85964	0.319479
1.46932	1.22601
0.868067	1.48937
0.973973	0.844492
0.937079	0.62394
0.576552	0.881385
1.19672	0.669321
0.974728	1.39615
1.05738	0.96366
1.31514	0.803322
1.2394	0.54726
1.36033	0.704077
1.87535	0.691821
0.985852	0.512127
1.06737	0.712499
1.15537	0.941351
1.14512	0.521239
1.51847	1.25285
1.78308	0.823627
1.17912	0.452101
0.959388	0.979
1.23469	0.869888
1.23117	0.768757
1.10464	1.0785
1.17523	0.597295
0.921302	1.60363
1.55713	1.11118
1.74719	0.687801
0.809107	0.71923
1.40232	0.69176
1.0538	0.397925
1.21759	0.935067
0.801062	1.19685
1.80476	0.717027
1.13079	1.24166
0.895658	0.969636
1.22997	1.31929
1.66246	0.903009
1.37196	0.816146
1.36058	1.44826
1.18736	0.846066
1.445	0.891759
0.612066	1.56448
0.683338	1.1015
1.05618	1.08202
1.11577	0.674101
1.1646	1.31608
1.41099	0.973093
1.19974	1.49107
1.45078	1.15436
0.741227	0.89264
1.57353	0.581452
1.85637	0.779755
0.546259	0.864355
1.01627	0.554429
1.27579	0.848959
1.28956	0.809047
0.627024	0.497859
1.07102	0.789184
0.680636	0.555999
0.700057	0.437395
0.880878	0.766116
0.834313	0.893455
0.988931	0.693959
0.768883	1.02155
0.885414	0.63601
1.42715	0.59245
1.02199	0.941603
0.791699	0.979563
0.726269	0.739843
1.23199	0.775856
0.963981	0.550591
1.08635	0.695659
0.796539	0.651536
0.936889	0.511247
0.915456	0.348836
1.08962	0.734752
1.01979	0.598865
0.905464	0.689371
0.686231	0.501944
0.568884	0.334442
0.9719	0.837518
1.47768	0.568129
0.720739	0.733685
0.908794	0.6054
0.725328	0.737579
0.444624	0.467813
0.735194	0.547763
0.715331	0.436263
0.512696	1.00219
1.03249	0.613697
1.16976	1.11388
0.938021	0.500687
0.802194	0.483591
0.788303	0.493271
0.791317	0.681452
0.933744	0.833307
0.880635	0.565679
1.14103	0.35355
1.15071	0.690503
1.05241	0.895593
1.19452	0.426396
1.00376	0.641101
0.852034	0.522562
1.2201	0.620107
1.37642	0.811371
0.80634	0.329285
0.818032	0.748578
0.847762	0.499997
1.11464	0.576174
1.06121	0.774538
1.08422	1.14361
1.09132	0.19051
0.674916	1.25367
1.10358	0.521933
0.74984	0.697732
0.675922	0.809485
1.0773	1.08717
0.668883	1.28415
0.891759	1.05876
0.974728	1.11451
1.85479	0.805087
1.18157	0.582146
0.626772	0.512379
0.814515	0.424072
1.25926	0.395535
1.15543	1.0208
0.609173	0.72149
0.969385	0.844496
1.39195	0.677683
0.722183	0.644558
1.30056	0.502638
1.03337	0.511186
0.929976	0.723315
0.987929	0.799176
0.640225	0.470645
1.16511	0.871081
0.867061	0.683026
0.610748	0.616338
0.513259	1.11577
0.838398	0.825579
0.948394	1.07397
0.824195	0.715019
1.00603	0.689249
1.46341	1.13953
1.35819	1.18617
0.967624	0.464422
0.842358	0.474856
0.775922	0.791009
1.02036	1.0389
0.778372	0.6384
0.801565	1.18296
0.682649	0.869073
0.933181	0.690507
0.650278	0.707729
0.610678	0.456125
1.02419	0.973344
0.938021	0.379823
0.647763	0.486171
1.09082	0.557886
0.605778	0.822998
0.626395	0.570142
0.727526	0.887045
0.999869	0.182339
0.96863	0.903013
0.604459	1.02727
0.838962	0.508294
0.862724	0.697229
0.615648	0.504148
0.584913	0.540976
1.05524	0.827652
1.43022	0.893333
0.617721	1.1675
0.923939	0.898989
0.687549	0.412319
0.711181	1.05147
0.698361	1.06127
0.792324	0.322502
1.09955	0.7225
1.42312	0.552165
0.655873	0.712191
0.832487	0.654932
1.09521	0.649649
0.687363	0.7741
0.542923	0.633057
0.839908	0.731048
1.18925	0.834187
0.822812	0.677874
0.938524	0.653362
1.08711	0.697984
1.46624	0.75952
1.27718	0.567123
1.07498	0.548145
0.74016	0.512318
1.34965	0.327594
0.934313	0.336328
0.529475	1.3983
0.759897	0.965616
0.922308	1.20773
1.27516	0.782271
0.729665	0.517848
0.535759	0.54255
0.75298	0.401884
0.84349	0.703643
0.839717	0.405467
0.97416	0.578039
0.771524	0.638022
1.15455	0.459773
1.33513	0.680259
1.05273	0.807663
0.507478	0.804775
1.56511	0.555184
1.22702	0.591765
0.663857	1.05964
1.03117	0.551727
1.39188	0.530858
1.40323	0.514582
0.545254	1.22131
0.905948	0.408402
1.4196	0.42376
1.55645	0.883284
1.24914	0.350617
1.75939	0.839216
1.56602	0.574963
1.21993	0.606435
1.19891	0.690159
0.718608	0.796668
0.885551	0.74618
1.18149	0.602917
0.91526	0.78534
1.49597	0.598131
1.54644	0.60455
0.976572	0.639046
1.4342	0.456119
1.33336	0.745806
0.822224	1.01975
0.863643	0.751722
1.23101	0.844133
1.66095	0.86704
1.49879	0.914131
1.108	0.8294
1.4546	0.719494
1.13822	0.660068
0.885551	0.37177
1.11166	0.6539
1.32769	0.768966
1.28224	0.525882
1.04191	0.246506
1.04934	0.388891
1.71142	0.272818
1.14112	0.259718
1.35703	0.600268
1.54575	0.842369
1.15648	0.541301
1.30869	1.14158
1.83002	1.08568
1.05727	1.12017
1.0686	1.47771
0.803209	0.941903
1.08698	0.766533
1.6627	0.691879
0.986892	1.47658
0.903681	0.83363
1.18405	0.894064
1.14804	0.873164
1.39215	0.739587
1.8732	0.494089
1.10486	0.499631
1.19727	0.465136
1.35199	0.623635
1.01056	0.848363
1.15648	0.613063
0.972541	0.530096
0.792507	0.422084
1.08874	0.542943
0.799691	1.06982
0.731951	1.37977
1.19613	1.09625
0.672029	1.43705
0.732707	1.46173
0.745051	0.635475
1.3681	0.389343
1.08233	1.28006
0.996838	1.61746
1.26437	1.22038
0.838087	1.28976
0.728051	1.54922
0.613993	1.61809
1.13419	2.07962
0.874849	0.722091
0.892727	0.488807
1.18644	0.970856
0.460523	1.08102
0.688395	0.799639
0.614749	1.10645
0.847651	0.414526
0.939679	0.938506
0.825499	0.51373
1.54209	0.816891
1.17272	0.34491
0.85546	0.296186
1.69279	0.468532
0.966999	1.7348
0.723395	1.30789
1.13306	2.30108
0.938046	1.54809
0.854574	1.25387
1.4872	0.663169
1.01849	0.809333
1.2295	1.09449
0.959198	1.92716
0.791378	1.466
0.64345	0.811852
1.14137	1.34037
0.980976	1.32337
1.14742	1.00674
1.11304	0.757925
0.961083	0.776853
0.859612	1.40017
1.10624	1.34225
1.0083	1.21598
0.855078	1.30864
1.1454	0.610422
1.17813	0.620994
1.04594	0.466647
1.83581	0.604125
0.848537	0.342261
0.983365	0.853905
1.23654	1.1315
1.5893	1.0858
0.562497	1.00195
0.556712	0.668581
0.525361	0.373611
1.06017	0.56711
1.39128	1.31234
1.40488	1.05678
1.5217	0.857484
1.4857	0.5683
1.92898	1.49388
1.14024	0.560491
1.41444	0.725419
1.82512	0.385877
1.91664	0.357167
1.26073	0.871705
1.04204	0.760418
1.3588	0.902048
0.886811	1.3413
0.971664	0.533171
1.09731	0.4954
1.5173	0.750028
0.813164	1.67291
0.714716	1.63023
1.04959	1.47575
1.036	0.747952
0.965878	1.43736
0.837088	0.93365
1.11494	0.584162
0.758906	0.16518
0.863522	0.298627
0.907459	0.87888
1.03449	0.847286
1.00478	0.623818
1.06269	0.499561
1.12992	0.310085
1.23693	0.521713
0.947245	0.45902
0.943849	0.88417
1.27923	0.619283
0.883918	0.783325
0.741906	1.0224
0.914635	0.74896
0.919664	0.860499
0.850804	0.884292
0.725662	0.726418
0.583902	0.553063
0.581765	0.994197
1.1731	1.05967
1.30856	0.944474
0.311848	1.4507
0.810393	1.42161
0.34332	0.657931
0.693938	0.455997
0.366488	0.537453
0.498927	1.07565
1.00175	0.949634
0.51869	1.20609
0.5474	0.74367
0.315366	0.991808
0.657053	1.2903
0.529522	1.03373
0.840232	0.653657
0.599772	0.913375
1.16277	0.626589
0.658183	0.434089
1.18367	0.751853
0.526621	1.06596
0.587307	1.23857
0.437737	0.952909
0.239452	0.990427
0.575224	0.898017
0.844133	0.820209
0.984129	1.18745
0.671908	0.948001
0.524605	0.927726
0.621802	0.687396
0.502202	0.889834
0.611856	0.666617
0.545506	1.06923
0.456249	1.58818
0.386251	0.817316
0.613367	0.641817
0.610596	0.796798
0.354274	1.35665
0.729067	1.09982
0.466447	0.952527
0.510385	0.57849
0.497285	1.08686
0.331489	1.06256
0.394303	1.58037
0.445043	0.979968
0.466065	0.677441
0.681472	0.951389
0.424646	0.788103
0.369502	0.651885
1.16806	1.00188
0.940313	0.480919
0.806866	0.737875
1.32304	1.4507
0.858613	0.435722
1.22308	0.659946
0.729067	0.646594
0.953161	0.387128
1.28704	1.09806
1.26866	1.16869
1.13684	0.697464
0.691801	0.520071
0.98035	0.539208
1.04532	0.390021
1.64092	0.788989
1.24486	0.901413
1.52825	0.570176
1.5606	0.621672
0.874849	0.811644
1.20734	0.646473
0.901031	0.595733
1.17486	0.983877
1.56551	0.769469
1.00263	0.714838
	0.997976
	1.10474
	0.98161
	0.979621
	0.623809
	0.815301
	1.17712
	0.786591
	0.848285
	1.02982
	0.748951
	0.901031
	0.421997
	0.503835
	0.438615
	0.727295
	0.920802
	0.534048
	0.533292
	0.935909
	1.33147
	0.951771
	1.18934
	0.618145
	0.486714
	0.924199
	0.972298
	0.611222
	0.973054
	0.870697
	0.43547
	0.902925
	0.411173
	0.565147
	0.468332
	1.25405
	1.04859
	0.515293
	0.784958
	0.609589
	0.537575
	1.07527
	0.648488
	0.711685
	1.01082
	0.725662
	0.337022
	0.465935
	0.880765
	0.993442
	0.796537
	0.807492
	0.95958
	0.645213
	1.19802
	0.702998
	0.683235
	0.528758
	0.494393
	0.818576
	0.905818
	0.630107
	1.06357
	0.773752
	0.74883
	0.852567
	0.915642
	1.06218
	0.622931
	0.537323
	0.590825
	1.25858
	1.03335
	1.93918
	1.08471
	1.25203
	1.03814
	0.80082
	1.19425
	0.823988
	0.706403
	0.945099
	1.05337
	0.994449
	0.526873
	0.455363
	0.52649
	0.989159
	1.21993
	0.84501
	0.820087
	0.962343
	0.42125
	1.33085
	1.01824
	1.56375
	1.51591
	1.08169
	1.60718
	0.936916
	0.524232
	1.03436
	0.929489
	0.491874
	0.450707
	0.434845
	0.473614
	0.614497
	0.335389
	0.532415
	0.487096
	0.689785
	1.08976
	0.626337
	0.883666
	0.50711
	1.28389
	0.843255
	0.642824
	0.461035
	0.652267
	0.635779
	0.592971
	0.555704
	0.344206
	0.729944
	0.807622
	0.567162
	0.708167
	0.743921
	1.18745
	0.889208
	0.816691
	0.490996

## Sheet: Fig. 6 L FM unloading
	sec	FM1-43 intenity Pclo wt/wt
	1	65.243	61.163	70.046	72.42	74.653	95.613	142.729	113.913	87.812	101.348	108.808	89.179	75.511	88.57	99.19	97.412	91.393	80.752	73.889	64.304	80.681	73.363	120.208	104.461	95.996	53.33	130.683	115.976	90.311	189.094	172.779	75.167	81.742	107.792	111.083	153.361	90.597	111.969	75.079	154.279	106.319	62.167	71.032	69.208	85.99	43.368	99.341	47.161
	2	66.123	60.612	68.159	73.17	72.183	98.048	138.402	111.542	85.167	99.639	108.9	92.463	77.201	85.588	100.958	99.124	88.829	83.144	73.346	65.539	82.809	72.377	117.69	103.32	97.465	54.379	130.254	114.343	84.874	187.745	169.089	77.642	82.984	107.542	107.494	151.952	91.634	110.337	71.284	151.452	105.319	63.368	68.734	67.62	86.726	43.763	101.286	48.804
	3	65.863	60.721	66.139	72.54	75.12	100.927	137.991	110.855	86.573	102.055	107.588	85.962	71.511	86.048	97.838	98.588	87.857	82.568	72.34	65.115	78.444	72.07	117.412	102.129	97.956	53.882	132.206	113.217	84.709	182.724	162.695	77.747	80.72	108.896	106.045	147.976	90.307	112.922	73.032	150.386	104.78	60.711	69.427	70.96	85.106	46.996	98.31	48.938
	4	65.13	59.489	64.033	68.847	73.77	96.395	137.537	113.444	84.672	98.133	104	88.792	72.201	85.967	101.134	99.497	85.18	79.401	73.333	65.477	79.194	71.423	113.44	100.207	98.167	47.804	126.921	109.361	87.278	181.792	164.795	75.235	82.419	106.031	106.25	151.133	91.143	113.329	69.205	150.428	105.162	60.886	69.815	64.398	86.668	44.175	96.175	46.125
	5	66.09	61.815	64.854	71.883	71.057	99.097	136.607	111.098	84.646	99.337	105.512	85.848	71.642	81.267	96.44	99.91	86.75	78.919	69.629	64.262	75.344	68.943	117.824	99.414	94.456	50.462	126.556	107.127	87.464	179.26	164.584	75.863	81.07	106.798	108.083	143.422	90.584	115.431	72.368	150.109	104.148	57.425	69.133	67.266	84.822	42.947	94.262	49.58
	6	62.517	60.326	61.417	71.963	74.187	96.024	137.245	111.375	81.812	98.772	103.252	83.73	68.215	84.488	95.444	106.181	86.436	78.667	73.41	64.936	75.524	68.313	114.856	100.441	94.623	49.194	123.81	105.542	84.358	179.021	159.816	75.044	79.032	102.84	108.66	145.373	88.559	110.043	70.058	146.971	104.995	59.645	67.347	69.894	86.312	42.93	99.651	44.973
	7	61.493	56.851	61.404	71.017	69.36	100.605	133.721	109.265	81.729	96.931	103.509	86.51	72.741	83.639	90.718	101.04	86.018	76.365	72.381	61.073	78.097	68.777	111.153	98.961	95.715	48.355	122.717	101.958	84.252	179.615	163.137	74.316	80.086	101.444	103.699	140.476	89.912	110.471	68.637	145.503	104.379	60.075	68.746	66.701	86.572	44.82	97.937	49.098
	8	62.19	57.167	60.06	67.547	69.48	95.621	138.044	111.451	81.26	99.745	102.706	83.68	77.715	80.873	93.741	97.938	84.841	75.532	71.781	62.2	76.806	69.247	113.074	100.25	94.25	45.223	122.048	100.337	85.298	177.656	164.737	75.94	78.774	102.388	102.353	139.343	88.261	107.255	69.742	145.819	102.525	59.667	66.282	66.423	84.861	44.329	94.683	45.92
	9	60.747	56.67	56.609	71.52	68.44	94.911	133.175	107.735	86.776	96.051	103.572	83.537	69.099	81.903	92.361	97.006	81.491	72.563	70.965	64.399	78.233	67.653	112.713	97.324	91.846	46.703	122.121	99.627	85.444	175.344	159.689	77.193	79.113	100.862	100.295	138.627	86.282	107.8	68.168	144.83	103.063	56.232	60.661	66.741	84.788	44.557	98.063	46.598
	10	60.687	57.127	52.781	69.283	67.397	100.282	131.843	106.876	87.281	96.499	100.049	79.317	67.208	79.388	89.06	100.949	80.113	75.941	70.07	64.217	74.122	68.797	110.375	95.984	87.298	41.75	123.025	97.789	83.126	176.969	159.926	74.733	78.575	98.857	113.346	138.078	91.197	108.616	64.289	141.947	99.967	57	64.081	64.588	83.683	43.154	98.659	44.67
	11	59.323	55.185	56.728	66.23	69.047	95.863	127.354	105.865	81.297	96.865	99.745	75.622	65.825	78.103	88.532	102.508	80.46	71.712	70.063	61.836	73.944	66.853	110.162	95.754	87.263	42.136	120.178	92.922	79.179	171.5	156.684	73.733	78.226	103.688	111.109	136.699	84.95	104.384	63.679	142.245	100.571	56.127	62.484	67.245	80.409	43.632	100.357	43.268
	12	63.813	55.757	58.172	70.807	67.46	94.065	129.563	104.618	85.292	95.419	100.366	78.191	68.285	79.333	86.38	100.034	82.387	70.059	72.425	57.166	74.438	68.45	109.787	97.004	87.443	42.203	119.717	92.711	81.305	171.125	153.963	71.986	77.027	100.301	108.795	133.62	87.63	106.592	64.763	147.5	99.308	56.961	63.726	63.442	83.438	42.987	104.167	46.554
	13	62.277	55.75	55.384	65.273	63.8	96.702	131.52	109.476	85.75	95.887	100.551	80.205	68.511	78	88.12	99.96	82.723	73.194	68.635	62.315	71.92	66.043	107.875	92.176	86.136	42.232	119.298	91.602	82.245	172.646	155.174	74.077	77.887	100.003	109.327	134.241	85.391	104.973	63.126	139.707	99.525	59.285	61.298	67.394	81.952	43.263	98.421	42.527
	14	62.953	54.192	53.278	67.09	67.047	93.218	129.441	108.793	85.99	94.576	99.167	81.886	72.073	79.003	86.519	101.548	81.966	71.662	67.263	61.137	73.698	69.733	108.565	97.414	87.868	43.518	114.581	87.259	84.689	173.677	159.511	74.509	78.183	101.312	110.75	132.699	85.416	102.384	60.026	144.806	99.588	59.307	61.359	65.215	83.457	43.228	96.857	40.759
	15	58.723	51.746	55.536	66.547	65.287	94.427	128.367	107.989	86.224	97.747	99.729	79.372	68.588	76.297	86.537	101.836	79.631	67.027	69.286	60.448	74.212	66.173	104.458	96.469	82.952	43.723	119.365	85.795	82.212	170.844	159.789	72.912	76.29	99.683	105.212	130.669	85.908	104.506	63.1	137.162	98.168	58.171	59.246	65.029	81	43.654	92.659	42
	16	59.43	53.37	50.45	66.867	67.047	92.669	125.445	108.709	82.318	97.863	101.051	77.381	65.686	77.303	85.856	99.983	79.387	67.126	68.213	62.035	72.545	65.517	106.12	95.551	84.127	44.065	114.781	86.675	78.093	169.391	155.884	72.53	76.167	97.531	104.346	129.922	83.727	105.082	60.426	146.048	99.299	55.921	57.48	64.526	80.615	42.921	100.079	43.161
	17	59.62	50.942	48.854	65.497	71.59	94.468	125.144	106.636	83.438	93.222	97.243	75.889	68.752	77.991	84.713	98.989	76.991	68.631	68.898	61.071	73.83	67.003	110.023	95.883	86.548	40.397	113.781	83.711	75.424	167.516	153.774	73.816	76.731	98.076	106.814	129.91	84.294	104.78	59.5	140.973	98.242	56.491	59.948	64.65	80.702	45.022	91.786	40.759
	18	57.107	49.815	50.722	63.343	67.28	94.5	125.022	104.156	83.693	95.341	98.144	74.569	66.927	76.558	83.657	103.068	78.213	67.099	65.873	60.596	72.663	65.527	107.537	93.91	84.816	38.371	117.527	84.608	77.563	165.484	156.084	74.46	74.882	96.935	105.391	127.922	86.429	103.812	59.889	139.324	99.747	56.882	58.548	63.584	82.707	44.092	92.841	42.42
	19	57.833	51.134	47.748	60.923	66.843	92.161	121.926	107.164	82.573	92.514	95.338	73.331	62.588	76.03	80.898	103.113	77.564	66.486	68.117	63.193	73.76	66.747	105.625	94.461	82.838	38.031	117.727	79.512	76.219	167.083	155.789	71.309	75.059	95.89	102.058	126.675	84.576	102.063	59.711	142.484	95.646	54.259	56.637	66.281	81.462	44.053	91.992	37.875
	20	60.503	50.159	47.788	62.137	65.823	88.976	123.376	105.367	83.354	93.596	94.519	70.786	62.723	73.87	80.486	99.181	76.296	65.284	68.47	59.909	72.302	67.087	106.792	95.699	84.18	37.491	115.029	79.06	76.139	164.068	154.379	72.449	74.71	96.579	102.577	124.355	83.958	100.251	61.795	138.835	96.223	54.732	56.169	66.066	82.692	43.123	94.381	43.42
	21	56.927	49.268	46.934	62.4	65.267	88.282	122.271	105.68	80.417	92.887	94.546	74.261	63.047	73.321	79.685	94.644	74.585	64.68	66.873	60.723	73.726	65.367	104.759	93.148	81.061	38.46	108.432	75.096	74.887	160.672	152.9	72.595	71.844	94.087	100.244	120.657	83.101	104.718	56.853	136.981	97.027	53.592	56.738	65.35	80.442	43.917	94.849	40.705
	22	58.23	48.978	44.583	61.153	66.02	88.347	120.214	103.724	81.495	94.009	94.63	68.437	64.226	75.155	76.773	98.294	73.793	62.009	64.117	59.993	70.372	62.693	103.769	92.266	82.079	38.283	109.279	74.102	70.457	159.448	150.211	71.133	72.312	92.379	104.199	119.09	81.731	97.706	57.947	131.622	93.58	51.719	56.032	64.628	79.014	43.211	85.944	44.196
	23	56.43	50.33	45.901	62.74	64.05	87.016	121.21	102.975	79.505	90.322	92.764	70.83	60.259	72.073	74.116	98.819	72.049	64.351	64.235	58.375	70.052	64.14	104.505	87.445	80.386	34.4	112.444	74.38	71.172	159.307	149.626	71.93	71.575	91.941	97.66	117.681	84.168	99.631	57.5	129.367	94.681	56.531	55.835	64.803	79.76	43.136	87.746	39.857
	24	56.853	48.402	43.768	60.087	68.277	89.927	120.843	103.862	82.161	91.286	94.856	71.988	61.5	71.348	76.87	98.469	74.232	65.883	62.902	59.845	70.649	62.817	99.829	93.023	80.816	34.246	108.14	67.988	71.861	158.578	150.379	67.74	72.715	93.003	97.756	114.235	80.282	97.655	55.768	129.715	95.681	51.978	57.887	67.668	78	43.487	88.794	45.312
	25	58.507	47.601	44.245	61.22	63.91	88.113	124.38	104.647	81.438	92.193	93.106	72.845	63.642	69.991	71.981	98.407	72.814	62.41	66.324	62.346	69.524	65.32	100.106	89.344	83.675	33.77	111.359	67.976	70.762	156.245	147.616	68.133	72.371	90.382	93.872	115.464	82.529	95.918	53.895	129.883	91.258	52.746	56.052	63.551	78.014	42.079	85.714	41.33
	26	57.477	47.504	43.358	58.823	64.593	90.29	118.428	104.575	83.74	91.916	94.866	76.666	61.577	71.712	73.463	103.062	73.576	63.342	63.47	62.703	73.976	63.36	97.778	88.031	80.101	36.364	108.311	70.916	73.391	157.188	144.416	69.612	67.731	91.626	93.904	116.452	81.395	98.812	57.479	130.146	92.038	52.395	55.754	64.303	77.543	41.544	82.54	40.232
	27	56.187	47.659	42.225	60.587	65.827	89.323	116.293	102.407	81.406	89.286	91.593	72.777	63.489	72.121	74.898	100.249	73.338	60.671	63.495	58.891	69.896	64.123	102.616	90.562	77.14	34.21	106.244	70.705	70.556	150.073	143.363	69.986	66.29	91.188	94.449	117.536	82.63	97.024	51.758	126.532	92.352	51.202	55.448	64.985	78.688	41.759	85	41.125
	28	57.05	47.92	40.272	61.553	65.38	87.379	117.607	101.513	81.458	90.299	91.523	68.267	62.135	68.533	70.5	99.559	72.976	56.491	64.133	60	71.656	62.523	98.852	87.582	80.149	32.922	105.984	66.428	71.384	154.276	144.711	70.012	66.349	89.362	94	111.633	79.139	93.051	52.295	127.098	89.552	52.189	51.754	65.431	77.014	42.618	82.619	40.062
	29	57.287	45.478	40.722	59.17	65.707	84.25	113.336	100.615	79.365	87.905	90.245	71.871	56.996	69.133	68.667	99.028	70.854	57.495	61.952	57.741	70.062	62.54	96.708	90.641	77.461	31.754	104.044	66.675	72.205	150.526	140.321	67.74	66.731	89.469	93.064	111.042	80.975	94.29	53.479	127.213	91.077	53.232	53.415	65.591	76.048	42.566	82.111	44.179
	30	56.303	46.504	41.159	63.18	66.383	88.024	116.703	101.455	80.797	87.058	90.602	68.185	58.555	68.642	69.463	101.763	70.384	53.523	63.921	56.894	70.851	64.697	103.333	91.109	78.263	30.538	106.057	64.669	69	153.88	146.853	69.019	66.591	84.624	90.256	109.458	81.366	95.09	51.221	128.489	87.602	51.759	52.173	63.69	75.341	42.82	83.984	42.134
	31	56.36	45.714	41.669	57.64	64.79	90.113	114.179	100.753	77.651	91.721	92.5	72.067	60.974	66.597	70.241	97.542	69.893	55.914	63.098	57.528	71.392	61.737	91.519	86.637	76.469	32.237	105.444	60.44	67.119	146.438	140.968	67.965	66.462	83.643	91.654	105.289	79.185	90.255	51.058	122.997	88.126	49.583	52.21	64.533	76.928	40.873	86.357	38.839
	32	53.267	45.493	40.589	56.69	62.957	85.218	115.052	98.931	82.484	88.727	87.6	69.66	61.445	66.394	67.889	102.011	70.146	55.613	59.486	58.749	69.083	63.37	97.13	84.84	73.934	30.359	103.927	62.277	69.152	151.37	143.316	65.821	69.301	85.882	90.801	107.181	79.454	92.165	55.153	129.051	88.676	53.101	50.887	63.234	76.365	39.083	79.651	41.848
	33	55.843	45.725	39.232	57.887	63.383	84.556	113.572	98.447	78.932	87.401	87.877	65.152	60.58	69.424	69.093	99.395	70.122	56.626	60.483	57.361	69.156	60.03	96.935	87.668	73.294	29.583	102.425	62.054	68.232	145.781	142.232	65.374	68.742	85.419	94.038	106.681	77.954	92.973	53.453	123.596	88.349	48	51.637	63.613	76.99	41.259	87.056	41.009
	34	54.097	46.591	36.033	60.777	65.133	84.718	109.729	100.429	80.318	87.871	86.884	70.977	57.912	68.824	68.755	98.508	72.061	53.761	63.454	61.226	68.146	63.487	95.944	82.285	76.377	25.969	100.346	61.06	70.033	147.88	141.142	68.344	64.704	83.823	89.038	103.53	81.244	93.008	51	124.521	90.893	49.917	49.915	63.876	74.639	41.061	76.69	42.741
	35	54.233	47.598	36.596	57.787	63.11	83.379	113.087	99.8	78.974	84.942	86.262	66.155	54.931	67.964	69.944	99.74	69.963	52.896	58.654	57.51	66.226	60.53	99.741	86.059	73.548	29.114	100.952	58.398	66.397	145.911	138.484	66.519	66.376	83.441	91.077	104.958	78.042	90.663	54.674	122.149	87.904	48.136	52.258	67.686	73.231	41.851	81.151	38.83
	36	52.673	44.279	41.192	53.75	61.873	84.54	112.725	99.578	81.464	86.528	87	68.015	56.566	67.821	64.25	98.531	69.265	54.716	60.705	58.503	68.378	62.423	99.19	85.176	72.289	27.301	101.797	58	67.079	145.099	138.758	70.649	65.194	82.705	87.853	105.157	79.483	88.871	52.532	122.785	88.687	48.614	53.121	68.146	77.745	41.18	83.127	40.607
	37	53.547	41.884	34.603	56.03	62.047	85.234	109.48	95.836	76.786	84.084	86.067	63.985	56.741	66.897	67.116	98.853	68.668	52.923	60.606	58.035	63.434	62.023	95.222	80.473	72.018	30.906	99.841	58.211	68.868	144.135	140.716	67.512	67.102	82.685	90.128	100.289	78.303	89.302	50.716	119.535	86.585	48.689	47.891	61.639	74.106	40.649	78.357	35.089
	38	53.597	44.438	39.192	55.93	61.303	83.629	106.319	98.033	79.234	85.927	85.569	65.284	56.168	65.373	65.134	96.441	67.994	54.743	61.225	62.499	69.344	61.997	95.681	84.137	72.623	29.252	100.565	57.06	62.49	144.365	139.884	67.347	69.118	81.708	88.917	102.145	80.643	90.686	50.026	122.484	87.412	48.939	49.77	68.518	72.389	40.289	75.349	39.116
	39	54.973	44.047	37.689	56.897	63.143	85.839	112.694	99.462	79.427	85.984	85.981	66.296	56.92	65.355	65.824	101.508	64.604	51.221	57.975	57.51	65.847	62.943	96.005	85.082	71.553	29.913	98.702	56.699	65.344	143.583	138.842	66.272	67.226	82.677	82.769	103.145	79.483	90.114	53.426	121.519	87.212	48.851	50	67.715	71.745	39.618	81.802	36.232
	40	52.457	46.014	34.391	54.043	65.463	82.169	110.419	98.335	81.266	85.494	84.685	65.065	56.577	66.467	65.606	98.011	68.107	51.505	61.93	58.809	67.368	63.053	94.106	79.934	70.693	29.868	100.927	58.349	64.517	144.578	140.947	63.63	65.489	79.503	83.974	102.753	77.546	89.8	51.168	123.13	85.962	48.294	49.488	64.967	74.341	40.145	79.698	35.25
	41	51.39	44.949	33.901	54.663	64.56	85.161	109.603	96.949	79.927	83.599	83.368	65.61	51.807	64.291	65.444	100.734	65.348	52.216	60.921	56.585	67.569	60.173	94.023	80.805	72.895	28.201	96.381	53.283	64.762	140.651	138.026	64.488	66.414	79.736	83.615	100.145	76.097	90.376	50.132	120.176	84.069	48.136	48.492	66.197	73.159	38.68	76.04	34.786
	42	53.29	42.362	33.854	51.92	61.847	87.081	105.751	96.738	79.057	83.481	83.181	64.129	54.609	64.406	59.259	95.802	63.345	49.815	57.737	58.914	65.16	58.34	91.917	81.051	72.838	27.69	92.902	50.855	61.947	138.099	137.368	64.17	66.586	78.317	82.942	96.904	77.454	85.969	49.568	118.33	83.165	48.088	49.54	66.891	70.913	38.184	75.46	34.071
	43	52.503	43.297	34.536	53.877	62.123	81.25	107.21	95.022	76.729	86.348	85.206	65.745	53.303	65.682	66.5	99.61	64.954	52.766	60.105	57.707	64.681	60.733	92.977	80.238	70.899	27.953	100.86	52.452	62.828	136.083	135.516	64.73	66.28	79.66	85.519	95.898	74.815	90.373	52.395	120.359	84.577	46.535	47.133	66.365	70.649	39.596	75.556	37.58
	44	50.343	42.185	32.417	49.437	63.25	83.758	109.611	96.098	75.964	84.271	85.875	62.686	52.934	65.579	62.731	95.893	65.415	50.216	58.492	57.384	63.767	59.09	89.273	78.766	69.377	26.931	95.571	50.301	65.695	136.87	136.932	66.312	65.489	78.89	86.192	97.133	75.861	85.18	51.753	119.854	83.269	47.535	46.827	64.252	71.543	38.961	78.278	37.5
	45	51.48	44.188	33.424	51.35	60.96	84.919	108.546	94.207	78.656	83.302	83.329	65.267	52.569	64.582	62.722	96.181	62.509	48.477	58.711	57.426	67.299	60.437	92.708	82.355	67.123	26.625	94.286	54.717	63.093	134.302	132.784	64.002	63.731	78.098	83.596	94.518	74.097	89.09	50.642	115.524	83.06	46.846	45.992	66.058	71.601	38.719	75.968	34.661
	46	52.037	41.54	32.623	49.517	62.19	80.46	106.14	92.731	78.026	83.501	83.738	64.07	55.88	64.648	60.426	92.345	62.857	49.446	57.117	57.02	65.688	57.177	89.546	82.559	67.539	27.266	96.962	51.837	61.503	135.255	133.489	61.191	65.21	76.848	80.673	94.157	74.475	86.318	46.679	113.359	82.148	46.789	48.254	65.204	71.63	39.259	75.587	34.286
	47	51.32	42.982	31.51	49.553	60.653	79.871	103.253	93.32	75.224	82.337	80.449	60.601	56.719	60.403	59.972	94.141	60.396	48.824	55.384	55.619	66.413	57.427	86.87	77.117	67.89	23.991	93.762	52.271	61	133.74	133.853	62.23	62.919	73.935	80.808	93.271	74.563	85.18	51.389	113.38	82.703	46.553	46.44	66.12	67.962	37.386	83.143	36.321
	48	50.623	44.141	31.338	46.69	60.527	78.492	104.031	93.062	78.755	79.384	80.551	59.434	51.544	62.664	58.824	92.079	62.393	48.892	56.07	57.033	65.392	56.953	92.931	78.797	66.544	25.926	92.559	47.512	63.291	129.547	129.737	61.742	63.355	74.739	81.583	93.771	72.634	83.682	47.363	112.899	80.129	46.575	45.899	66.818	68.894	39.934	79.619	38.054
	49	49.343	42.239	29.821	51.953	60.72	80.202	100.965	93.407	76.354	81.561	81.141	59.848	52.296	61.488	55.356	92.04	60.265	49.779	55.479	54.594	62.931	57.723	89.787	75.637	69.039	23.469	90.451	44.627	63.377	131.724	130.611	63.893	61.629	74.441	80.897	89.53	70.697	84.741	47.253	109.082	79.297	43.93	46.657	65.682	70.351	36.114	72.452	36.42
	50	50.577	41.775	30.417	47.243	59.133	78.952	103.314	90.051	74.901	78.951	78.336	62.56	56.682	61.555	56.787	90.107	59.021	47.486	55.406	59.273	63.382	57.733	91.301	74.98	65.456	24.719	92.384	46.042	61.715	127.755	127.879	61.686	65.124	74.607	77.481	88.313	71.622	85.216	49.111	109.513	76.832	42.662	46.645	66.252	68	37	74	35.438
	51	49.807	40.743	32.384	46.93	62.19	83.702	100.838	89.615	74.521	80.004	80.917	63.677	52.026	63.185	54.074	92.192	59.979	43.288	54.521	56.712	63.729	57.6	87.245	76.125	65.259	26.828	89.276	46.139	59.113	128.281	129.716	61.414	64.876	73.559	78.609	89.898	70.504	84.486	49.326	111.495	78.357	45.215	45.75	65.026	67.798	35.478	74.571	36.473
	52	51.69	42.67	29.265	46.227	59.737	81.806	102.07	89.949	73.688	78.761	79.134	57.402	51.752	60.955	54.38	92.887	59.808	45.919	56.295	57.188	65.073	57.723	86.588	76.715	62.868	25.346	85.66	43.373	58.788	126.76	128.942	62.667	62.898	70.84	75.891	85.38	70.979	81.463	43.695	109.755	76.492	41.162	43.165	64.613	67.99	35.763	68.635	31.625
	53	48.703	41.138	31.245	49.507	60.17	76.742	101.908	91.509	72.5	77.12	79.354	59.889	50.215	62.209	56.218	91.266	58.905	48.405	56.508	54.523	63.615	56.367	83.972	75.617	63.123	24.208	88.111	44.861	56.695	123.047	126.553	60.37	61.274	71.174	75.301	85.867	72.189	82.235	44.832	106.721	78.514	46.092	41.698	63.438	68.058	36.5	69.143	33.964
	54	49.887	42.435	30.907	48.003	58.267	77.887	99.371	88.949	71.828	77.421	76.046	59.29	50.609	60.145	53.856	89.537	58.409	42.779	56.06	58.186	63.372	52.83	90.838	73.109	65.737	24.152	84.514	41.151	57.967	126.068	126.847	59.742	58.161	72.708	77.788	87.03	69.458	80.298	44.7	109.622	73.253	45.539	42.641	65.423	67.832	37.228	73.952	34
	55	50.503	42.257	30.914	49.107	59.31	80.435	98.672	90.258	72.443	78.049	78.164	58.965	51.15	60.148	52.736	90.808	58.192	45.189	54.098	52.907	63.333	57.643	83.481	76.531	61.36	25.27	89.425	42.054	56.748	121.083	125.195	57.849	59.586	70.107	75.929	87.06	68.361	81.333	43.547	106.383	76.69	43.772	43.984	63.949	70.5	38.399	70.603	32.982
	56	47	44.641	33.404	44.567	57.88	78.669	98.86	87.949	70.443	78.053	77.403	58.466	52.263	58.782	56.894	91.288	58.945	45.473	52.895	55.488	58.285	55.287	83.495	72.066	59.842	25.397	88.137	41.53	57.053	124.125	126.484	58.212	61.683	70.958	76.968	84.807	69.563	80.055	47.111	105.777	75.81	43.013	45.02	65.08	70.212	34.978	68.183	38
	57	49.617	41.529	30.53	47.567	63.697	74.565	99.044	89.178	71.37	77.357	76.771	57.88	53.288	60.245	51.236	90.768	57.912	47.198	53.321	55.492	62.462	55.947	87.866	74.707	60.557	27.324	89.486	41.084	58.285	125.781	126.611	57.833	57.812	69.756	76.353	84.855	69.647	81.514	45	103.604	73.514	42.741	43.016	61.383	69.005	36.526	69.841	34.554
	58	47.14	42.413	30.629	46.11	59.52	78.855	99.764	89.364	73.411	79.213	77.009	59.437	50.606	59.476	54.87	90.791	59.436	43.761	51.019	54.951	60.753	56.373	90.116	71.871	61.294	26.118	84.048	40.651	55.066	118.333	121.868	61.826	58.925	70.376	74.724	89.229	70.181	79.537	43.116	104.984	74.802	42.794	44.819	63.891	68.721	36.425	69.532	32.589
	59	47.5	40.304	28.026	44.85	61.713	78.363	98.983	87.825	74.51	77.373	77.44	55.569	50.672	57.894	57.125	92.282	58.064	44.288	52.365	51.849	59.378	55.62	83.352	74.656	59.846	22.049	83.997	39.916	54.517	122.724	125.921	58.96	56.661	68.961	72.263	81.47	66.475	76.714	45.395	100.864	75.588	43.009	42.835	63.526	66.837	34.811	69.008	32.339
	60	48.49	40.069	28.079	47.133	59.523	73.274	97.642	91.255	72.432	78.57	76.62	55.988	49.172	58.436	56.31	91.215	56.098	41.482	52.222	53.024	59.708	55.287	83.94	72.699	57.329	24.308	85.429	40.464	56.073	118.24	121.532	57.919	54.812	69.042	78.321	81.584	66.105	80.22	44.958	103.548	75.929	45.294	43.782	65.723	68.495	36.548	66.246	39.152
	61	51.567	40.457	26.914	44.023	59.677	79.008	100.507	87.535	70.88	75.925	75.236	56.419	47.96	59.291	53.648	90.588	56.991	47.293	54.6	53.596	59.67	53.543	82.19	71.645	61.539	21.163	84.251	39.681	57.43	117.557	120.979	58.051	56.591	66.135	78.756	79.127	69.088	79.325	44.879	103.769	72.824	42.202	44.75	67.569	65.606	33.706	64.389	29.661
	62	45.78	40.37	27.219	42.087	55.853	79.355	96.576	87.484	69.411	74.838	73.583	55.249	47.887	56.609	49.94	90.667	57.811	40.77	49.324	51.949	60.226	52.11	83.329	71	60.947	22.342	83.806	37.217	56.053	114.083	121.511	56.463	58.446	67.663	76.045	81.163	68.382	78.494	48.289	104.835	74.283	41.123	42.677	66.007	66.442	34.237	67.016	32.527
	63	45.737	40.254	25.391	43.21	55.05	72.968	96.397	84.051	70.688	74.663	71.769	55.548	48.471	57.073	50	91.503	56.396	41.072	50.086	51.738	60.91	52.79	80.13	74.066	55.807	22.875	82.032	36.482	55.689	115.109	119.484	55.56	56.785	64.831	71.571	79.964	63.626	79.941	44.179	103.463	74.302	41.763	41.351	63.117	67.524	35.654	64.437	34.205
	64	45.657	38.496	28.232	46.187	57.327	74.444	94.1	83.916	68.984	76.497	74.829	56.985	49.785	59.609	52.505	86.463	55.951	40.324	51.733	52.976	58.802	52.92	85.81	69.09	55.702	22.031	80.222	38.831	54.464	113.172	119.037	55.672	55.774	66.506	73.814	76.169	65.891	78.451	44.895	100.261	71.989	40.061	40.714	62.938	68.736	34.706	73.651	33.5
	65	45.22	39.732	25.934	42.157	56.53	75.048	93.345	82.407	69.219	74.809	74.37	54.085	46.318	57.47	50.782	85.379	55.619	42.649	51.692	52.089	58.049	53.187	81.435	73.035	58.083	22.297	81.26	36.861	55.53	113.615	118.342	56.435	55.656	65.944	72.628	79.898	65.206	75.918	43.442	105.957	71.06	42.237	41.202	65.905	64.466	34.518	63.095	29.741
	66	46.097	40.188	25.954	45.213	56.293	70.25	92.655	84.825	69.125	73.304	72.382	53.314	49.354	55.639	50.269	87.119	56.838	43.077	47.756	51.468	55.969	52.02	80.347	71.691	53.904	20.895	80.606	34.349	55.974	110.203	116.374	57.537	51.667	63.713	68.923	77.361	64.088	73.78	43.684	102.295	70.777	40.654	39.516	65.602	65.798	33.456	58.984	28.893
	67	44.867	40.333	24.212	41.663	54.477	73.669	93.218	84.364	69.281	74.599	74.137	53.821	46.609	55.745	51.505	88.441	58.195	39.482	51.337	53.157	58.309	54.347	79.319	67.457	53.882	19.587	78.451	37.898	56.298	109.719	117.347	54.267	56.758	62.14	69.327	72.404	67.828	75.725	41.863	100.652	70.228	42.294	42.31	64.595	67.163	33.009	63.302	29.089
	68	46.08	37.453	31.291	42.797	53.95	74.177	93.166	81.345	67.719	71.333	71.799	53.886	44.613	55.842	48.792	87.605	56.988	37.532	50.543	52.514	56.104	53.143	82.505	69.586	56.219	23.817	77.089	31.38	52.609	106.698	114.3	55.491	55.871	62.256	71.673	74.717	63.227	71.961	40.347	97.973	71.527	39.075	44.407	65.186	63.038	32.535	58.667	29.277
	69	46.057	39.264	24.013	44.57	58.177	73.355	93.24	83.382	67.818	74.129	73.127	54.56	44.631	55.488	46.699	84.373	56.979	38.977	46.578	55.672	56.333	50.233	80.032	71.098	56.43	22.308	78.187	33.241	53.079	111.698	115.195	54.119	49.704	62.517	69.962	76.765	65.298	73.871	42.047	94.824	71.89	41.662	40.29	62.004	65.582	33.193	65.27	30.366
	70	44.197	39.409	22.331	40.567	55.003	73.315	92.751	84.553	67.823	71.557	71.343	53.689	44.438	56.664	48.222	83.446	56.787	38.122	50.21	54.109	59.326	54.05	80.194	69.25	55.259	22.058	80.121	33.205	53.907	107.573	115.689	53.628	54.532	62.725	68.455	75.693	59.714	77.435	41.663	101.104	71.255	41.732	41.383	62.23	61.899	32.715	65.429	29.179
	71	45.87	39.065	24.709	40.167	57.683	75.242	93.428	81.564	68.901	71.891	72.199	55.845	45.27	56.394	47.87	87.079	57.838	39.23	48.2	51.696	56.559	50.513	80.468	67.855	52.114	24.087	78.933	35.235	55.377	104.568	114.179	53.242	52.839	62.556	73.891	69.452	60.95	74.463	41.574	96.319	70.198	39.539	39.008	64.401	62.755	32.487	62.254	30.705
	72	43.753	42.156	28.007	39.927	53.523	73.532	93.162	86.095	68.932	70.494	69.176	53.208	43.54	54.858	49.065	86.52	56.82	39.392	49.086	52.488	56.642	51.813	79.338	67.57	54.811	22.188	76.825	34.277	51.96	107.677	115.021	54.902	52.914	62.427	68.301	71.187	61.987	73.043	41.847	95.064	66.805	40.57	39.04	64.416	64.976	33.311	59.405	30.446
	73	44.687	38.663	22.927	40.46	57.103	73.879	88.004	82.771	66.839	69.86	71.606	53.853	44.5	54.691	47.366	84.169	56.149	37.752	47.619	51.661	52.84	49.837	78.343	63.785	58.246	22.435	77.26	31.175	49.199	105.458	112.637	52.319	52.527	59.517	69.692	72.06	61.513	72.008	43.105	95.324	69.401	40.991	40.407	60.573	65.562	33.443	60.214	28.143
	74	43.8	38.71	23.934	40.947	54.21	73.274	86.057	80.189	68.255	71.035	71.491	53.633	42.584	55.794	47.616	82.565	55.168	37.144	45.14	49.694	52.944	49.6	75.532	66.406	57.228	22.062	74.317	33.018	53.735	104.63	115.953	53.607	51.914	59.713	65.59	70.193	62.584	74.62	41.037	94.295	69.448	37.807	41.363	64.358	61.952	32.566	61.778	25.134
	75	42.663	38.656	23.583	37.997	55.62	72.508	88.725	81.276	66.109	70.763	71.718	50.358	46.383	55.7	46.199	83.91	56.814	36.55	45.844	50.479	52.931	52.907	80.245	65.363	50.811	19.201	74.803	31.548	50.411	104.682	113.721	55.565	51.435	61.576	70.282	75.416	61.109	74.086	41.963	92.516	68.36	39.912	40.012	64.595	62.365	31.289	61.873	24.696
	76	41.65	41.793	26.536	39.267	54.807	71.395	88.755	80.178	67.844	71.84	71.972	53.487	43.814	55.809	48.366	82.808	54.893	36.221	49.121	49.814	53.243	50.517	83.583	63.562	51.785	20.413	79.229	31.735	51.636	103.484	111.168	52.267	53.575	58.978	67.34	67.964	61.315	73.235	43.647	97.476	65.179	37.689	39.883	64.635	60.183	31.987	61.841	23.625
	77	41.367	40.101	26.238	39.413	53.233	70.766	86.507	80.385	69.25	69.891	69.058	52.431	45.445	52.679	49.588	82.401	55.396	34.887	47.997	49.953	56.174	50.423	77.134	66.133	54.969	19.991	72.733	31.404	50.093	100.057	112.747	54.235	51.177	59.722	68.442	68.747	62.378	70.604	38.463	96.785	67.687	38.583	38.476	64.92	62.423	31.807	61.151	31.402
	78	42.247	39.598	23.298	40.1	54.22	74.306	89.624	82.356	68.688	69.224	70.701	51.082	44.891	55.091	46.995	84.401	56.387	35.509	48.587	49.803	54.938	52.677	77.931	67.172	55.263	21.172	76.359	29.596	50.53	101.25	113.589	53.198	53.575	59.542	65.417	71.705	60.643	70.592	38.521	91.064	68.473	37.469	40.052	63.861	60.928	33.14	64.984	28.795
	79	42.697	38.844	24.662	37.203	55.58	69.629	88.703	78.175	66.401	70.206	68.456	53.402	46.318	52.952	46.051	80.65	51.482	35.297	46.178	53.592	54.837	48.77	74.889	65.355	50.469	20.906	74.997	31.512	51.325	98.828	111.379	53.642	51.72	62.388	67.814	70.416	60.828	71.094	42.047	94.92	65.552	38.189	39.02	62.442	62.793	32.544	66.849	29.625
	80	45.763	39.667	22.205	38.797	52.467	70.75	86.895	79.691	69.745	69.958	66.85	53.924	42.219	55.467	46.069	82.932	53.351	37.27	44.914	49.151	55.938	52.13	78.532	66.938	53.934	20.116	74.432	28.994	49.616	99.938	112.337	52.714	51.194	57.834	65.545	67.06	58.924	71.012	43.9	92.883	65.742	36.123	40.456	64.036	62.207	31.662	65.008	27.92
	81	41.757	41.13	22.748	38.32	54.173	72.919	87.201	81.051	66.474	69.625	66.648	48.293	44.613	54.615	46.042	81.768	53.933	36.095	46.102	51.266	55.924	49.78	76.366	64.305	48.083	19.636	73.029	26.801	51.444	100.583	110.8	53.684	50.269	56.022	61.59	67.777	60.517	69.259	41.821	93.662	63.912	36.43	42.242	60.204	63.981	30.675	64.548	28.098
	82	39.497	41.286	23.146	36.127	54.987	73.653	88.555	79.389	65.599	68.324	67.271	52.082	41.135	55.009	44.148	82.175	52.619	34.788	46.251	48.86	51.368	49.177	76.565	64.375	56.294	17.935	74.959	27.717	47.861	99.391	110.968	49.93	48.156	58.216	66.154	65.873	57.735	68.047	41.074	89.809	64.918	38.132	37.863	61.464	60.505	31.215	67.548	24.473
	83	43.28	39.489	22.404	39.843	53.55	71.556	85.223	78.713	67.068	67.984	66.296	48.449	44	56.139	46.019	81.147	52.96	32.919	45.8	50.993	55.962	47.523	73.704	65.852	50.658	20.712	72.689	26.849	51.51	96.401	106.416	51.837	51.081	58.728	62.481	69.578	59.458	68.831	40.168	94.553	65.527	36.601	40.056	65.544	60.38	31.303	66.754	26.705
	84	44.173	40.304	22.033	35.203	54.65	71.645	88.223	80.356	70.552	67.581	67.998	46.865	41.847	55.297	45.333	82.531	50.875	36.928	46.568	47.814	54.51	49.503	76.449	64.223	50.855	18.839	73.521	27.307	50.391	96.188	109.374	52.951	49.226	55.972	61.846	69.53	58.134	71.345	40.937	91.314	63.486	38.219	38.181	62.785	61.337	31.482	61.024	28.973
	85	40.943	38.478	23.695	36.603	52.32	67.621	84.188	77.116	64.729	66.736	62.549	52.63	44.785	50.773	44.046	83.181	50.552	32.153	45.435	46.49	54.038	49.453	72.347	65.004	49.987	17.982	73.222	25.193	51.205	98.469	111.079	49.83	50.957	56.284	65.455	65.548	59.529	67.565	40.532	90.593	61.948	36.009	40.536	62.664	60.764	31.982	66.603	24.562
	86	41.363	39.04	21.808	39.117	55.003	70.589	84.127	79.72	65.646	67.902	66.745	48.554	44.526	55.339	42.819	78.373	52.256	32.721	45.302	49.84	50.069	49.93	73.62	61.23	51.693	17.766	72.787	28.699	51.146	94.026	106.058	52.219	50.156	57.879	62.462	66.446	59.798	69.027	40.532	88.426	63.379	39.311	36.351	63.153	62.721	31.925	64.746	25.643
	87	39.71	36.928	22.589	36.92	51.573	74.274	80.057	78.64	68.458	66.732	63.586	52.135	39.347	52.561	45.306	79.362	50.671	32.703	41.743	47.647	52.035	50.44	70.171	59.883	49.254	21.071	69.159	29.265	48.649	94.688	106.321	50.865	51.624	55.624	62.968	64.663	56	66.224	42.137	84.513	62.327	36.706	38.669	61.423	62.543	31.864	64.222	24.929
	88	39.057	37.783	19.424	37.003	51.84	69.903	82.214	78.684	67.13	66.694	64.72	49.035	40.737	53.458	43.782	80.305	50.552	32.928	42.556	47.69	49.594	48.863	69.19	61.461	49.649	19.819	71.654	26.446	47.477	91.797	103.889	47.414	48.661	56.379	61.256	63.006	60.416	67.416	38.242	89.032	59.788	35.768	38.556	61.836	60.62	33.307	66.333	28.562
	89	37.08	38.029	21.795	36.56	52.743	65.508	75.485	75.589	65.328	68.8	66.086	47.094	41.752	53.152	42.949	80.559	49.604	29.766	41.425	47.217	51.972	47.12	72.569	59.773	49.759	18.19	65.546	25.078	48.325	90.474	103.121	52.002	49.468	54.59	61.333	63.524	57.063	64.584	40.142	85.936	61.659	33.211	38.335	64.248	61.938	31.491	61.27	26.384
	90	37.177	35.598	19	35.78	52.71	65.613	82.808	76.109	66.557	66.191	65.995	46.021	42.405	52.758	39.681	78.921	51.183	31.64	43.562	44.421	50.899	46.533	70.255	64.641	50.092	19.4	68.381	28.259	47.013	92.922	103.668	48.698	49.495	52.135	59.385	59.91	58.622	66.529	38.605	91.66	62.456	36.241	38.782	58.949	62.524	32.939	64.063	30.143
	91	37.43	36.12	22.536	34.517	51.947	67.774	76.878	75.189	64.807	67.018	64.359	47.111	41.898	51.588	42.588	78.859	50.832	30.842	40.683	46.151	49.983	49.827	70.662	60.27	48.706	17.955	70.397	29.506	47.013	89.75	101.132	50.681	50.065	53.86	58.308	60.223	57.983	67.114	39.721	88.184	60.569	35.719	37.415	61.869	62.957	31.316	68.548	24.661
	92	40.473	37.243	21.086	32.533	51.66	68.315	80.144	75.145	65.109	64.718	62.685	48.12	38.774	54.088	38.731	79.407	49.854	32.973	43.289	50.517	52.747	48.02	71.394	59.617	46.89	19.096	66.044	24.572	48.801	89.234	102.868	48.647	49.43	53.017	59.872	60.675	59.752	65.51	39.242	83.843	58.791	32.728	34.907	59.737	60.399	28.868	65.492	27.027
	93	35.913	37.217	18.748	33.423	51.597	68.218	79.633	70.891	64.177	66.605	62.553	47.883	39.901	52.524	42.245	78.311	50.287	31.378	44.981	45.98	51.233	46.5	69.509	58.527	50.478	19.938	65.857	27.229	47.185	89.531	100.111	49.598	50.145	50.677	57.122	58.62	57.521	66.922	39.853	82.593	59.959	37.171	38.222	60.912	59.274	29.978	60.524	23.286
	94	34.76	34.04	18.563	33.353	49.09	68.444	77.341	74.364	62.693	65.217	60.456	44.563	38.595	51.533	38.449	80.073	47.829	29.842	40.114	43.608	48.337	47.703	71.301	62.668	51.513	17.92	68.327	25.181	48.536	89.245	103.321	46.777	50.726	51.025	57.865	58.151	57.147	65.875	39.437	83.84	58.61	33.917	36.218	59.77	61.861	32.026	62.024	24.482
	95	35.44	34.232	19.788	34.293	48.497	67.798	75.751	72.971	63.115	64.887	61.002	45.537	41.69	51.033	39.435	76.164	48.826	31.351	44.53	47.53	52.014	48.353	67.181	59.027	49.123	20.089	67.552	26	44.199	86.38	100.584	47.112	46.048	50.368	61.256	56.373	57.008	62.784	38.389	85.668	57.786	35.404	38.879	58.734	58.995	32.803	64.786	24.179
	96	33.557	35.692	19.139	35.287	50.917	67.823	76.611	71.676	61.411	62.792	57.16	47.575	39.102	52.03	38.389	76.746	49.378	30.865	41.197	43.293	50.122	48.173	68.491	57.602	48.526	18.067	63.159	21.916	46.98	88.536	100.437	47.363	45.962	50.517	57.795	57.994	53.643	62.059	36.858	86.213	56.838	34.114	36.839	59.069	60.49	30.096	62.706	23.884
	97	36.967	35.275	18.397	33.767	51.347	69.75	75.694	71.636	64.984	66.013	63.454	43.572	37.92	51.512	37.838	76.915	48.476	31.302	42.159	47.248	48.899	47.76	69.255	58.543	48.768	17.859	64.73	24.404	48.159	86.755	101.321	48.077	44.64	48.68	56.846	56.536	55.836	62.929	37.553	81.686	56.835	34.693	38.677	62.745	59.606	30.206	59.992	24.804
	98	35.017	34.431	21.96	34.02	49.78	64.758	78.493	71.96	63.615	64.395	59.812	45.015	38.876	52.797	41.769	76.729	48.735	31.468	40.013	45.226	46.448	44.593	73.435	60.074	48.645	19.576	66.613	25.102	45.801	86.88	99.279	47.388	47.941	51.876	58.404	59.801	55.361	65.071	36.874	86.016	56.755	35.373	35.593	60.321	59.793	32.101	66.595	28.08
	99	33.143	35.312	17.854	33.61	48.403	64.71	77.061	72.644	63.193	62.96	60.345	43.32	38.675	51.661	36.792	74.932	46.982	32.338	40.765	47.756	48.809	48.077	67.009	58.953	47.338	18.056	63.324	23.241	45.874	88.62	100.642	48.521	46.457	48.57	57.846	55.663	54.866	61.651	36.216	85.42	54.637	35.386	34.298	60.219	61.332	28.991	57.984	23.339
	100	34.497	35.558	19.311	30.083	49.727	62.629	73.485	73.578	63.036	63.35	61.079	46.428	40.588	52.615	37.167	77.045	50.963	32.257	41.759	48.922	51.028	50.11	68.815	56.363	45.351	19.056	64.886	24.982	44.821	84.438	98.779	46.835	46.027	49.761	60.436	56.518	53.752	62.925	40.579	79.551	56.984	36.061	34.617	61.431	61.957	30.408	62.69	28.143
	101	35.237	34.761	25.662	32.493	46.187	65.073	72.127	71.796	61.99	63.235	60.632	48.191	36.303	51.482	38.5	76.559	49.53	31.514	40.581	46.361	45.538	47.977	68.889	57.758	46.57	19.154	64.048	23.289	46.205	85.312	100.474	47.307	48.333	49.413	54.929	57.277	52.966	62.157	38.653	81.199	56.904	34.513	36.383	57.332	58.438	28.434	62.373	22.67
	102	34.793	35.761	19.49	32.017	49.897	63.653	75.424	74.211	63.188	63.455	59.076	43.411	40.453	52.067	37.31	74.339	49.305	33.257	40.317	47.124	48.205	46.443	68.023	57.422	47.224	18.54	61.098	24.699	46.318	81.615	97.626	47.388	47.978	48.829	52.474	56.988	53.349	64.447	39.063	83.484	57.335	35.737	35.262	59.387	60.808	31.171	65.333	26.795
	103	32.773	33.906	19.742	33.807	50.763	65.508	71.428	70.724	63.964	64.175	60.662	40.871	37.628	50.397	36.023	77.475	47.369	29.73	41.813	45.341	48.111	44.933	68.94	54.469	45.443	18.355	60.851	22.325	45.702	81.745	100.363	46.719	44.93	45.121	56.224	52.633	52.046	59.812	36.447	77.886	54.668	35.667	36.125	62.263	62.889	30.364	62.675	26.911
	104	32.157	34	21.854	32.283	51.527	68.637	72.258	72.171	62.37	63.676	61.831	43.276	37.365	52.176	35.13	73.119	47.104	25.095	40.102	46.636	48.25	46.047	66.458	56.262	46.031	17.004	61.705	22.386	45.384	81.901	96.668	46.398	44.731	47.646	56.346	51.898	52.361	60.647	38.8	78.684	53.558	33.873	34.677	60.445	60.106	32.355	60.643	24.848
	105	33.607	34.558	18.775	29.963	46.463	66.04	74.148	70.745	64.542	61.306	56.921	42.859	38.285	51.033	35.755	74.39	45.5	28.509	38.01	45.876	43.146	43.353	68.25	56.703	46.776	17.797	62.019	23.548	45.51	82.448	97.837	45.588	46.419	47.455	55.122	55.886	50.773	59.278	37.774	77.798	55.953	31.855	33.831	60.431	60.837	30.066	61.841	26.116
	106	34.027	33.572	19.894	30.573	47.393	63.169	69.769	69.829	59.635	60.113	56.583	43.812	37.515	51.761	37.764	72.972	45.582	33.482	38.711	44.528	45.597	45.78	65.204	56.609	46.439	19.342	59.292	24.241	44.98	83.062	93.868	45.147	44.758	50.388	54.712	55.199	49.113	61.867	37.316	75.141	52.907	33.316	37.56	59.077	61.447	29.246	61.246	21.232
	107	34.21	33.04	17.53	35.64	47.44	61.935	72.952	71.287	61.594	63.344	58.021	44.067	39.763	49.685	37.037	72.469	44.076	30.036	38.784	46.488	45.715	45.093	64.167	54.84	48.605	18.987	61.502	24.62	43.656	80.016	95.047	46.709	43.78	46.812	56.25	56.41	51.689	61.58	37.995	81.952	53.126	33.171	35.073	59.27	56.87	29.987	65.913	24.67
	108	31.217	32.957	19.252	30.21	46.047	62.815	70.642	69.502	60.812	62.945	60.977	44.651	38.175	50.618	35.667	72.605	47.43	29.158	39.117	45.013	44.618	46.433	66.329	55.895	44.404	19.281	58.486	23.392	43.272	80.245	96.426	45.926	46.398	46.087	52.955	58.717	49.395	59.824	37.411	81.593	53.404	30.991	35.198	56.65	56.909	29.294	61.111	25.214
	109	33.047	34.692	18.722	30.33	47.003	62.613	69.546	70.905	57.161	60.118	55.683	41.396	39.54	50.833	37.38	74.701	46.399	29.158	35.984	46.315	45.132	42.383	62.94	56.039	42.627	19.614	58.038	23.181	47.146	77.922	96.347	44.04	42.258	45.152	51.577	49.982	50.903	60.294	39.516	77.08	53.802	34.623	33.935	60.007	61.639	27.145	62.024	27.134
	110	32.927	32.065	19.675	31.523	49.153	61.71	69.266	70.2	62.536	61.264	54.764	41.029	36.018	51.894	35.782	71.791	45.402	27.176	37.225	43.729	44.174	45.613	63.565	56.52	41.851	17.199	58.721	24.5	43.464	76.495	94.311	45.06	41.409	45.607	52.199	53.114	46.664	59.388	37.526	77.261	53.157	31.075	35.685	58.617	59.139	30.057	62.873	23.679
[truncated: 394 more columns]

## Sheet: Fig. 6 % FM released
% FM1-43 released after 90 sec
Pclowt/wt	Pclowt/wt + Rab5S43N
49.5318	61.2996
47.5745	50.839
71.9113	56.2397
56.472	50.9858
34.158	38.3754
35.4586	44.5531
51.4703	34.7861
38.374	29.0761
28.7842	44.9213
39.5509	59.2042
49.6691	23.9133
53.9925	41.7762
52.301	69.0257
41.4091	38.4568
63.9258	60.351
26.3017	25.5555
50.3222	26.675
66.3463	21.833
49.6204	18.8701
31.9965	16.4542
45.2486	23.6098
37.8256	21.7387
47.1208	33.8851
45.8937	23.188
56.4034	27.2849
67.7499	40.3193
55.0661	50.8851
78.8749	54.683
51.873	35.2971
59.5466	49.7395
45.4152	43.6578
40.0535	67.5543
49.3418	63.0623
57.6898	61.1665
53.009	40.9103
65.3667	57.0682
48.4928	47.5531
46.9603	63.9194
50.018	58.8817
49.9212	27.4737
50.0024	30.5091
50.0137	32.155
49.7621	43.5893
15.3031	28.0662
31.2257	6.92365
30.6931	46.4561
36.7099	45.9557
49.7911	38.3605
43.4053	-7.61095
42.4008	43.0817
17.0554	11.1824
40.7325	9.15013
17.9357	13.1454
47.7615	40.0519
57.9099	25.5578
42.7161	45.4626
45.101	4.20007
28.0316	23.2428
35.0484	15.7456
53.0551	32.9127
45.8989	45.3764
49.1031	28.228
71.0318	50.6224
39.0448	53.7024
42.4987	43.8151
49.668	42.1918
51.5642	68.6112
62.5404	47.4614
63.0816	53.2188
64.4593	57.6814
63.4733	65.688
59.8269	11.6041
58.5645	23.2985
65.8054	19.7377
57.616	47.7023
52.7356	48.1876
61.5592	15.1543
61.9161	51.3819
71.6838	41.6097
71.775	45.8513
52.0489	11.2811
63.7071	10.631
68.5183	11.8722
63.0191	8.75882
64.4953	14.2811
76.0879	56.338
69.4233	50.2559
66.8412	56.4462
68.6177	33.0879
62.4748	23.7936
63.4443	41.1509
58.8187	19.245
67.024	27.2457
65.9582	41.5428
64.351	50.9742
63.7628	63.9429
59.314	50.4618
65.6229	7.82972
51.9987	64.5913
53.1081	52.5685
58.1006	50.2627
58.3638	10.7482
47.4266	44.3688
54.2994	54.5732
53.1048	36.7604
46.2266	41.2694
46.7274	62.0659
60.1383	44.2701
53.2641	28.7086
56.1444	3.19344
60.8515	37.7589
55.9604	58.5953
57.512	35.4576
54.6091	44.3322
55.9261	64.4618
51.2282	61.2137
54.9754	51.3336
56.0454	55.2481
55.4079	58.4398
58.9871	30.4595
53.6427	55.8553
46.726	36.8297
68.7689	36.4403
63.0609	62.692
62.8136	43.746
58.6611	50.1314
67.0949	59.5731
68.6722	52.1069
57.9022	59.4439
74.7381	45.3221
60.6323	8.81072
24.3837	18.9615
1.99064	0.833558
9.69126	41.55
63.8088	40.7594
54.143	23.8239
57.3576	44.7489
65.7615	42.6473
56.4483	23.7773
27.884	32.5485
30.986	39.599
37.4434	39.9805
39.6198	48.791
38.4229	44.9431
60.1805	17.2857
41.4373	36.6571
72.8151	31.8713
40.9713	55.0389
27.0945	51.4925
31.0027	51.2856
58.5255	65.1989
37.4267	65.1907
44.0232	31.7343
39.428	52.5044
58.9616	48.8166
65.572	64.2392
63.8902	68.3558
43.9989	57.0916
51.1395	45.4921
27.1652	36.6414
55.3476	51.5463
44.353	45.7657
45.6821	36.1477
52.7782	45.3647
35.1001	69.4646
25.4094	59.7046
44.6397	49.946
35.321	8.57558
37.1498	47.682
40.7676	50.1252
41.6573	23.6359
59.5813	59.7955
25.9775	42.8439
28.0444	39.6808
37.9419	44.2438
29.1752	35.6459
54.9696	35.906
57.4566	12.22
20.4545	67.536
40.7189	67.7176
28.7047	55.5848
43.1939	66.003
34.3737	53.6208
23.4358	61.9697
49.835	65.3841
62.7921	68.0253
28.2831	61.0368
22.9259	41.8516
33.349	9.27677
41.6832	42.0931
32.4123	26.6219
41.2555	53.7434
21.4864	59.7435
36.092	33.1351
27.4267	45.8435
27.4279	34.6092
27.9077	34.9196
26.2285	29.8718
30.071	35.9061
23.4483	35.1415
27.2385	38.1305
29.3941	32.1576
60.1723	30.7444
34.0001	32.8651
35.014	48.1581
56.3546	56.0497
17.4671	33.7625
25.2531	34.2657
58.8093	29.0688
43.5735	34.9424
52.3197	35.6742
54.1941	48.135
47.0244	32.5582
29.6213	36.195
26.5002	31.0334
30.7104	26.6177
42.9601	29.453
53.2372	31.8596
41.5015	39.5244
41.6254	42.3462
35.1861	50.3662
44.3915	54.5895
43.6015	46.8438
45.1874	35.1952
48.2193	30.6565
44.4541	30.6565
67.9535	25.9219
64.7026	37.714
65.6876	29.5393
59.3913	32.6224
60.7296	27.6624
56.9461	35.9625
72.6741	36.6351
70.7108	40.024
68.1764	34.6625
67.4137	33.2421
61.0598	50.875
56.0837	30.0431
67.4137	29.2656
63.8467	40.9935
51.5968	43.3247
60.0828	54.6292
64.1017	32.953
61.6089	28.9617
75.2116	35.2799
61.1524	51.7891
50.9789	49.8475
65.2469	65.9972
65.7113	22.2027
66.6718	16.9123
65.6596	59.217
64.9639	25.6564
73.3234	34.6382
31.0372	27.8057
26.9855	29.7953
64.1805	35.4215
71.8835	30.5244
65.6321	48.175
48.4547	32.2266
64.3692	29.5136
64.4203	24.4424
42.9014	23.8851
69.4699	22.5069
64.8337	47.088
70.7396	24.9981
51.3699	45.3274
51.9727	49.1042
48.6759	16.5743
56.5533	27.2184
57.2016	44.4059
62.4347	50.8989
65.0178	58.4878
49.8658	48.4485
42.3787	28.956
59.8802	40.3949
45.1271	35.2855
60.8412	41.1679
51.2755	49.0555
63.1745	42.2484
62.0483	36.0383
52.0809	44.2703
51.9724	43.7743
55.402	38.1439
67.7821	40.1003
57.7591	48.4744
61.8285	36.7536
55.8597	44.2171
10.0305	60.7076
61.7519	46.4595
65.4792	71.0481
71.5105	43.7765
66.7929	45.8513
55.2473	41.8755
	41.729
	45.2054
	36.5314
	53.3379
	44.8236
	45.6518
	58.719
	45.0432
	55.4292
	50.7165
	48.4684
	56.0704
	51.1888
	48.5589
	45.9121
	54.9144
	55.5467
	50.9954
	49.0936
	54.4302
	54.1524
	49.3813
	63.5565
	72.2183
	67.0806
	61.1615
	63.6336
	56.4364
	59.2913
	59.9795
	75.7736
	63.0219
	66.7677
	62.8212
	59.0378
	67.8994
	65.4253
	62.8877
	61.6615
	60.9912
	61.737
	61.8735
	63.3048
	61.1728
	65.1016
	70.8194
	63.5331
	60.9345
	60.9151
	63.8172
	58.2969
	62.8464
	65.4568
	66.437
	55.4581
	61.9391
	71.2519
	64.4986
	55.8709
	56.4913
	61.2029
	68.8596
	17.3237
	40.7815
	48.8556
	13.2618
	45.3802
	31.9645
	48.0761
	34.7468
	68.6898
	22.8571
	32.9198
	57.7976
	41.5117
	38.6517
	-17.1538
	47.5642
	41.5482
	40.4194
	46.8156
	48.1004
	52.4949
	36.9458
	51.4872
	17.998
	37.8756
	30.909
	22.2703
	55.4848
	35.9325
	55.141
	55.1092
	16.8027
	15.6804
	33.5592
	2.54163
	18.8503
	31.7043
	14.2943
	16.6789
	4.04718
	48.558
	34.6153
	44.325
	49.0488
	34.0311
	20.6776
	17.0741
	45.9582
	18.6902
	48.0693
	22.1387
	32.1448
	49.6414
	5.8633
	30.3008
	38.6168
	51.7786
	22.7537
	14.0625
	56.2027
	62.5146
	14.387
	9.11867
	5.01734
	28.684
	26.0866
