# Supplementary material for: Critical role for Piccolo in synaptic vesicle retrieval
Source: eLife. 2019 May 10;8:e46629. doi: 10.7554/eLife.46629 (PMC6541439; doi:10.7554/eLife.46629)
Supplement: Figure 7—source data 1. [file elife-46629-fig7-data1.xlsx]

## Sheet: Fig. 7 C
norm Rab5 intensity at PI3P organelles
Pclowt/wt	Pclogt/gt	Pclowt/wt + Rab5Q79L	Pclogt/gt + Rab5Q79L
0.471927	0.307301	1.83182	0.140647
1.06463	0.403865	1.29556	0.526505
0.43981	0.4869	2.22288	0.874252
0.426117	0.742189	1.10346	0.738736
0.973312	0.567254	2.11512	0.746247
0.965591	0.951549	2.16074	0.723809
0.975785	0.740253	1.60688	0.355397
1.05045	0.613064	1.47453	0.685928
0.95232	0.831849	1.85389	0.804441
0.8026	0.815802	1.12994	0.634172
1.26986	1.12072	1.55645	0.53306
0.343968	1.03657	1.71303	1.13908
0.388425	0.574321	1.28337	0.841877
1.35178	0.429173	1.37389	0.371771
0.411936	1.0734	2.02586	0.548687
1.30156	0.972565	1.57718	0.804908
0.479529	0.700461	1.43295	0.7462
0.460263	1.29682	1.74575	1.11748
1.25344	0.668529	1.27672	0.655211
0.827066	1.06323	1.36577	1.11524
0.956168	0.410885	1.41261	0.530843
1.06379	0.770225	1.29186	0.86807
0.54491	0.120751	1.79469	0.770761
0.0205262	0.281202	2.37463	1.07102
0.205723	0.685999	2.43863	1.30783
0.0646092	0.456835	3.07831	1.33494
1.27037	0.503484	1.14225	1.137
1.72901	0.321995	1.19664	0.728659
1.38102	0.601424	1.38194	1.00608
0.898579	0.281084	1.38161	1.5405
0.721126	0.361343	1.34709	0.810785
1.16247	0.170223	1.87555	0.549129
0.883208	0.636365	1.96596	1.47068
0.559977	0.541736	2.09411	1.30452
0.173908	0.304339	1.54955	1.34725
0.554331	0.291721	1.36059	1.56501
0.79047	0.552699	1.86177	1.36327
0.921298	0.445592	1.61908	1.05535
0.387538	0.654627	1.4277	0.618847
0.52044	1.11139	1.57784	1.06057
0.6818	0.78002	1.00107	1.27203
0.255894	0.4159	0.981336	1.20754
0.731809	0.492451	0.989872	1.16527
0.946395	0.808756	1.53882	1.05422
0.275509	0.810925	2.3865	1.38513
0.0896128	0.95752	0.994187	1.39196
0.751822	0.447879	0.852724	1.1673
0.646744	0.751682	0.72171	1.52088
0.528838	0.696753	0.548944	0.750702
0.725907	0.403725	0.902592	1.65187
0.605669	0.850042	1.13143	1.75984
1.05698	0.688099	0.944062	1.81307
1.22309	0.855757	0.926266	1.35101
0.743192	0.449022	1.19067	1.06134
1.13917	0.454619	1.26482	1.37207
0.73715	0.667317	0.808897	0.8506
0.643105	0.656354	1.13229	0.892375
0.736217	0.5687	1.61702	0.960692
0.742679	0.911128	1.45133	0.73547
0.773793	0.218598	1.84959	1.37993
1.05567	0.239731	1.07417	0.713825
0.603875	0.339187	0.917309	0.368341
0.817434	0.34742	1.08023	0.688844
0.627129	0.401253	0.914744	0.686302
0.502296	0.5151	1.43061	1.24297
1.3786	0.658221	1.25512	0.917263
0.379911	0.325076	0.993138	1.04767
1.11482	0.35731	0.672121	1.13936
1.13523	0.241712	1.49154	1.16294
0.470248	0.465792	0.691225	1.42047
0.424483	0.617682	1.19518	1.59554
0.424041	0.522821	1.1792	1.71524
0.642359	0.619804	1.26072	1.47043
1.58791	0.324142	1.3358	1.49364
1.01665	0.180695	0.878637	1.43964
0.902078	0.279639	1.12954	1.5196
0.585214	0.700203	1.08753	0.773909
0.644272	0.603897	0.543556	1.07629
0.865785	0.29965	1.00597	1.11713
0.21272	0.0827327	0.63226	0.973288
0.225829	0.223497	2.0152	0.935969
0.489677	0.317774	1.74071	0.918219
0.617052	0.189489	0.863219	1.94469
1.17887	0.561026	1.87182	1.60954
0.531194	0.257363	1.29678	1.537
0.408716	0.604713	1.30921	1.49088
0.476475	0.677369	1.49744	0.604153
0.468241	1.0229	1.54698	1.4566
0.207472	0.647093	2.38104	0.941426
0.561702	0.611804	1.48657	1.17428
1.56055	0.785595	1.96479	0.78844
0.737266	0.942571	1.62943	0.767985
1.86786	0.538821	1.63284	1.19021
1.52888	0.930278	1.7266	1.43602
1.26135	0.471204	1.21199	1.6633
1.35996	0.468241	1.40073	0.284419
2.16375	0.867745	0.832943	0.251718
0.808569	1.1465	1.54968	0.683434
0.749559	1.09952	0.707364	0.620503
0.922184	1.46735	0.583767	0.557365
1.60828	1.88255	0.601844	0.763997
0.983715	1.03596	0.873878	1.24691
1.21463	0.702513	1.02299	1.05485
0.646487	1.14752	0.703586	1.01352
1.00251	1.26711	1.04298	0.878847
0.761967	0.927666	1.1517	0.900771
0.657101	0.846332	0.447739	1.14594
0.671957	1.20322	1.35697	1.25309
0.778668	0.675084	1.40414	1.36188
1.41727	1.53581	1.45956	1.34811
1.16229	0.939352	1.20119	1.05926
0.622346	1.02936	0.953766	0.425207
0.249899	1.09696	1.38751	0.787088
0.0924341	1.05854	1.37093	0.534366
1.05257	0.62111	1.49786	1.15667
1.03794	1.17635	0.357893	0.794551
0.700017	0.936809	1.58012	0.951387
1.73575	0.519182	1.47575	0.896061
1.11748	0.71884	1.34168	1.16672
1.47729	0.962862	1.40414	0.835837
1.28686	0.8729	1.03323	1.05768
1.51388	0.41562	1.51493	1.21708
1.41974	1.46117	1.09248	1.7865
0.89767	1.12355	0.971282	1.99095
1.36335	0.956891	1.18874	1.43467
1.1384	1.21624	0.910499	1.00312
1.10223	1.21232	1.52811	1.19998
1.07995	0.791007	0.792873	1.47652
0.609004	0.615303	0.913787	1.33095
0.913273	0.706503	1.06724	1.88983
0.550436	0.552839	1.55034	1.34835
0.239893	0.61444	1.6891	2.00074
0.461126	0.573132	1.42056	2.67652
0.866111	0.446666	1.15424	2.28949
1.00911	0.324538	1.27933	2.37657
1.33687	0.225876	1.54532	1.5147
1.08025	0.173862	0.765769	0.838518
0.740089	0.612551	1.54656	1.05122
1.25745	1.31499	0.929275	0.846169
0.611617	0.151563	1.40234	0.772626
0.765209	0.504232	1.34385	0.277446
0.843066	0.833014	1.10036	1.04403
0.659806	0.309588	1.64343	0.979585
0.358382	0.220978	1.10626	0.325892
0.246378	0.364913	1.55619	0.409859
1.14235	1.04427	1.40736	0.549691
1.29253	1.02309	1.7127	0.46915
1.33686	0.491333	1.34592	0.94896
0.387234	0.68677	1.44953	0.751262
1.46282	0.353367	1.75902	0.681357
1.03258	0.15933	1.5154	0.613227
1.34823	0.621741	2.21252	0.4514
0.840548	0.74788	1.67498	0.784639
1.13852	1.10911	1.08408	0.338438
1.78799	1.08655	0.673264	0.439061
1.35213	0.39871	0.694886	0.938254
1.15219	0.609145	0.35661	0.947608
1.20698	0.0135286	0.498702	1.06712
0.69885	0.0517582	0.697265	0.646324
0.970978	0.165605	0.984415	0.907186
1.05831	0.599582	0.251299	0.367268
0.893004	0.459565	0.846705	0.739996
0.620807	-0.0232316	1.24961	1.03319
0.857108	0.617846	0.941497	0.452379
0.619151	0.752173	0.821586	0.418232
0.933706	0.0479793	1.15716	0.49539
1.31329	-0.0046415	1.11704	0.60877
1.3644	0.846193	0.566928	0.577703
0.607768	0.842485	0.590998	0.572128
1.11417	0.418561	1.25332	0.918125
1.15743	0.0927157	0.904644	0.626591
0.780557	0.385137	1.22998	1.08457
0.923654	0.200708	0.899233	0.624422
1.50504	0.502809	1.23891	0.746293
1.03414	0.611804	1.26755	0.629763
1.08532	0.57985	0.329321	0.670628
1.86116	0.581856	0.654931	0.634567
1.29127	0.417511	0.595804	0.663234
1.67237	0.430316	0.895782	1.03617
1.44913	0.566578	0.369323	0.762877
1.15254	0.477875	0.117113	0.961439
1.27382	0.52772	0.835975	0.433488
1.34725	0.829377	0.792266	0.386651
1.1586	0.450678	0.568584	0.905437
1.11319	0.71168	0.408529	0.722595
1.80814	0.273342	0.801526	1.94576
1.55428	0.302591	0.849551	1.74869
1.23781	0.703564	1.51136	1.58358
1.62509	1.16733	0.239123	0.751168
1.38184	1.07883	0.529958	1.22727
1.37067	0.956168	1.21185	1.4674
1.64667	0.739716	1.32894	1.20495
1.47659	1.25848	0.740323	1.35091
0.523752	0.737315	0.787671	1.56452
1.35105	0.663865	0.592234	1.06465
1.49485	1.1583	0.673917	0.763461
0.675036	1.24416	0.665426	0.871897
1.22967	0.277096	0.982944	0.556082
1.56013	0.0309761	1.31509	0.750655
1.46765	0.436824	0.759798	0.86189
1.63463	0.175495	0.409207	1.2297
0.595688	0.997593	0.973172	0.721359
0.616772	0.778926	0.778901	1.26559
0.91857	0.401277	1.07389	0.9223
1.38744	0.165208	1.04954	0.868632
1.08063	0.442468	0.878473	0.733349
1.11193	0.215497	0.606998	0.559254
1.26405	0.291347	0.536489	0.167028
1.04643	0.375736	0.491053	0.994303
0.658243	0.441535	0.983551	0.737944
0.947025	0.631117	0.90623	1.32117
0.930349	1.21048	0.610753	1.64676
0.7817	0.427377	0.852047	1.07242
0.675084	0.239824	1.19919	1.52543
2.26526	0.997826	1.07027	1.29591
1.64956	0.413732	0.0459483	1.0215
1.71601	0.887291	0.889436	1.68441
1.75107	0.733629	1.12646	1.0277
0.441395	0.381451	1.03433	1.07333
0.550834	0.39281	0.0831044	1.13155
1.12163	1.03452	1.06031	1.00265
1.13498	0.668344	0.856782	1.04767
0.463437	0.613251	0.742957	1.36605
0.898628	0.53271	0.750608	0.934268
0.768289	0.978	0.86203	0.905228
0.887967	0.594498	1.37753	0.526904
0.820606	0.181395	1.04221	0.537749
0.803182	0.177407	0.82835	1.24264
0.293866	0.513351	1.86546	0.701279
1.10584	0.510483	0.699412	1.04555
1.73222	0.249574	0.806541	1.03881
1.31133	0.402653	0.974269	1.30746
1.26506	0.511952	0.95351	1.10472
1.23858	0.528931	0.983739	1.36164
0.429382	0.0965638	1.1688	0.805538
0.755016	0.566694	0.634965	0.727727
1.08086	0.864993	1.00527	0.577984
0.1253	0.571149	1.45842	0.471904
1.29988	0.530845	0.882416	0.856503
1.09131	0.343362	0.942197	0.448788
1.00706	0.352225	0.586894	0.741163
1.38254	0.230355	0.703026	0.974899
0.514609	0.359805	0.919735	0.418326
1.26839	0.700508	0.727821	0.0711402
1.80838	0.134584	0.554239	0.699317
1.91985	0.257714	0.736568	0.600001
1.24537	0.748184	0.725511	0.454292
1.46847	0.853004	0.74886	0.244255
2.07456	0.794717	0.849201	0.403819
1.67018	0.554497	0.61619	0.712285
2.10437	0.7128	0.129872	0.683829
1.93683	0.73069	0.598369	0.291906
1.76413	0.771741	0.573203	0.512137
1.10719	1.03832	0.607512	0.243321
1.45499	0.600958	0.818834	0.502808
1.34429	0.460965	1.02973	0.438245
1.21122	0.537585	1.16161	0.906393
0.77244	0.945253	0.915771	1.26149
1.06862	0.423062	1.36915	0.875605
0.737126	0.842741	1.60233	1.00272
0.691201	0.128356	1.12788	0.63627
0.929438	0.446901	1.36866	0.902987
1.85004	1.22494	1.76017	0.7375
1.58269	0.424136	1.02505	0.276932
1.91957	0.551465	1.01868	0.520162
2.00871	0.871944	0.694864	0.629693
1.01777	0.742329	1.30765	0.456509
1.3824	0.336737	1.06255	0.678535
0.799099	0.742819	0.897437	0.731925
1.28866	1.42499	1.13024	0.902778
1.38812	1.52853	1.05166	0.742981
1.60886	1.15536	1.04597	0.503952
1.40512	1.14918	0.239404	0.930115
1.54099	0.423342	1.02614	1.00356
1.49168	0.306603	1.03344	1.14102
0.834833	0.53313	1.13794	1.07991
1.20812	0.55305	1.84966	0.978887
1.08916	0.56161	1.62029	0.7114
1.53963	0.524432	0.938441	0.754785
1.34727	0.363234	1.09402	0.631864
1.22421	0.690618	1.22802	0.657054
1.92661	1.22144	0.385742	0.466609
1.13383	0.834228	0.479904	0.442397
0.77454	0.576444	0.334661	0.702164
1.20119	0.26772	0.411912	0.961347
1.86429	0.708741	0.411772	1.06845
1.78323	1.16161	0.454783	0.3237
1.287	0.634102	0.605227	1.10449
1.09285	0.359549	0.764814	1.15203
1.56949	1.19506	1.27569	1.35996
1.39726	0.996637	0.735799	0.681242
1.28565	1.07946	1.02941	0.548082
0.694537	0.856246	0.651363	0.451051
0.909263	0.894102	0.562566	0.490703
0.911339	0.640215	1.26305	0.206214
1.49755	0.89009	0.564292	0.141674
0.948775	1.40631	0.987843	0.582906
1.0908	1.33449	0.733698	0.308397
0.83642	1.00438	0.441441	0.220091
1.40398	0.778692	1.14797	0.583395
1.00944	0.681662	1.14745	0.138175
0.924003	1.01607	1.294	0.0304385
0.597249	1.26168	0.969534	0.294961
0.662978	0.689475	0.890136	0.867745
0.520931	0.231122	1.57756	0.435028
0.749185	0.14144	0.553959	0.500126
0.636621	0.0699492	0.325869	0.344971
1.12966	0.280874	1.1277	0.384552
0.647933	0.302613	0.0933692	0.451262
0.481232	0.119725	1.5986	0.786086
0.697405	0.183214	0.635618	1.1067
0.572479	0.210971	0.61563	0.841785
0.438409	0.0844805	0.507613	1.1764
0.351104	0.588222	0.704147	1.18571
0.464718	0.213676	0.655491	0.237724
0.324281	0.346136	0.991995	0.26028
0.764161	0.185641	1.1959	0.431623
0.914208	0.371093	0.650523	1.25083
0.330649	0.422594	0.558251	0.581132
0.958687	0.630859	0.559557	2.82249
0.932332	1.21185	0.617495	1.03053
1.1621	0.730386	0.528186	0.932121
0.986071	0.317214	0.339909	1.41524
0.56751	0.872829	0.755461	1.3598
0.896761	0.296456	0.576188	0.739669
1.22603	0.231053	0.68509	1.01775
1.00718	1.01264	0.22163	0.693183
1.04336	0.512395	-0.0419843	1.08553
0.676856	0.217222	0.888878	0.585774
0.520511	0.310194	0.586031	0.944996
1.08912	0.385811	0.875116	0.971633
1.18092	0.480463	0.592516	0.592445
1.215	0.396541	0.633846	0.58582
0.511695	0.314299	0.650874	0.660599
0.612411	0.837912	1.60312	0.583675
0.692227	0.606089	0.194108	0.857693
0.657917	0.504115	-0.0285024	0.321437
1.02204	0.575371	0.937253	1.38777
1.06171	0.857738	0.361274	0.843464
0.768358	0.827392	0.0281757	1.18948
1.06402	0.518552	0.391083	0.885682
0.911176	0.905366	0.187506	0.494249
1.38912	0.801666	0.628037	1.27089
1.68128	0.979796	0.267392	1.40815
1.44288	1.54798	0.479109	1.01954
1.23324	1.01021	-0.0131327	0.673195
1.00174	0.969882	0.0136911	0.444124
1.45576	0.690618	0.437196	1.04191
1.89034	0.678675	0.0671505	1.69421
1.00506	0.977346	1.02295	1.08417
	1.3695	0.324818	1.35509
0.49283	0.640027	0.925519	0.796185
0.281654	0.578543	0.185266	0.546121
0.311193	0.38159	1.52179	0.796231
0.168707	0.458887	1.05705	0.551394
0.106857	0.593283	0.65444	0.491309
1.62025	0.320853	0.854775	0.268792
0.899351	0.152753	0.78345	0.858695
1.05567	0.276605	0.803136	0.968577
1.13232	0.429009	0.320713	1.09999
1.16618	0.283721	0.0842004	0.830775
0.824132	0.431552	0.0780429	1.76817
1.09389	0.228674	0.0574716	1.08131
0.8396	0.834624	0.0742881	0.927455
0.658999	0.688471	0.749325	0.850484
0.273312	0.51356	1.00683	1.95327
0.360839	0.852349	0.420122	1.17439
0.283338	0.333914	0.18669	1.1931
0.249472	0.99232	0.507332	0.60476
0.870616	0.895734	0.4796	0.773186
0.429322	0.866647	0.711353	0.612293
0.90005	0.881225	0.211296	1.50549
1.37213	1.26142	0.00946969	1.21491
0.489306	0.691083	0.355768	1.13138
0.732457	0.775636	0.988635	1.71503
0.652857	1.20821	0.192661	0.901845
1.14305	0.519182	0.0865807	1.16947
2.11028	1.21745	0.096913	0.629997
1.09021	0.781629	0.0129218	0.390523
1.96687	0.820955	0.213443	1.28607
0.140802	0.267089	0.0803298	1.22055
0.496588	1.44923	0.435889	1.64926
0.173552	0.312432	0.0308811	1.2564
0.55424	0.769221	0.108015	0.465536
0.792027	0.402769	0.699457	1.27245
0.240378	0.355117	0.0644917	0.405521
0.711753	0.895618	0.122639	0.742072
0.43453	0.4709	0.928038	0.903292
0.393332	0.576607	0.109904	0.710491
0.973535	0.589646	0.861212	0.707388
0.874839	0.277539	0.518062	0.568653
0.995792	0.324656	1.44276	0.746456
0.462411	0.742421	0.412657	0.760289
0.703307	0.657543	0.367758	1.1774
0.839522	0.669696	0.949427	1.26904
0.549602	0.885144	0.230166	0.545561
1.08602	0.916354	0.3289	1.09019
1.81117	1.03228	0.518342	1.00489
1.18406	0.838542	0.561353	0.702606
1.84037	0.934406	0.746083	0.760755
0.332465	0.840874	0.682476	1.34753
0.264889	0.343898	1.30926	0.90679
0.914872	1.29512	1.62612	0.524127
0.782596	1.09362	1.24684	0.693346
0.867221	0.529398	0.918732	0.792057
1.3044	0.488907	1.22365	0.501036
0.765338	0.606789	0.35108	0.842275
1.06679	1.07104	0.621646	0.617775
0.999109	0.641309	0.736753	0.627151
1.27543	0.477875	1.19538	0.871873
1.1468	0.558018	0.264384	1.24462
0.914405	0.762107	0.81454	1.11909
1.12011	0.844164	0.185779	0.944949
1.31551	0.537912	0.492055	0.613787
1.39822	0.589739	1.10745	0.718374
0.740594	1.05854	0.614392	0.739342
0.855768	1.06997	1.1753	0.850835
0.788503	0.239078	0.908236	0.979236
1.08594	0.654675	1.11935	0.366149
0.977343	0.746318	0.943153	0.543136
0.782258	0.65969	0.332001	0.43253
0.544834	0.643339	0.965825	0.954815
0.125669	0.409814	1.20891	0.835604
0.179254	0.899468	0.83495	0.975317
0.59124	0.984042	0.956751	1.13686
0.5332	0.329717	0.71919	1.12229
0.895024	0.390945	1.03799	0.760009
0.900258	0.292514	1.93058	0.89466
0.58782	0.644716	1.83107	0.377275
0.576653	0.878964	2.03052	0.780673
0.815554	0.990339	1.57065	0.857318
0.850948	0.604061	0.901496	1.02483
0.67439	0.677487	0.406617	0.357215
0.452719	0.483217	0.671724	0.669276
0.258696	1.10804	1.08508	0.812139
0.710563	1.1225	0.642125	0.289738
0.19879	0.563593	1.79382	1.421
0.333994	1.0128	1.1113	1.0984
0.520659	0.901193	2.02838	0.673613
0.390223	0.467869	0.900422	0.598018
0.445854	0.680519	0.193966	0.642125
0.335705	0.416602	0.518272	0.897973
0.937052	0.758866	0.442537	0.84085
0.423958	1.34644	0.714199	0.888294
0.666876	0.793806	1.52177	0.359618
0.290257	0.552163	1.16191	0.280642
0.601424	1.14713	1.30944	0.635292
0.371902	0.404519	1.65966	1.20369
0.789747	0.638488	0.462735	1.06689
0.955242	0.931609	0.322951	1.42665
0.841621	0.996521	1.15091	1.25939
1.36459	1.38837	1.6956	1.1391
0.769459	0.368949	1.32283	1.46847
1.08451	0.536303	1.45363	1.45657
0.777336	0.637088	0.55179	1.16728
0.706728	0.403049	0.91542	1.02026
0.947053	0.63998	0.844302	0.537679
0.219753	0.525806	0.691621	0.878264
0.0814393	0.513142	1.85067	0.560955
0.636768	1.17257	1.79338	0.882439
0.636768	0.475799	1.97277	1.15415
0.436604	1.26429	1.22631	1.10799
0.271084	0.581506	1.03675	1.34618
0.371023	0.540711	0.334148	1.01751
1.08469	0.885612	0.789094	0.904808
0.627673		0.157323	1.42898
0.932752	0.223976	0.29039	1.30312
0.504207	0.954285	1.11347	0.691038
0.893288	0.309715	1.94492	1.56557
0.958222	0.253747	0.401532	1.2226
0.367681	0.303005	0.978442	1.15251
0.446528	0.548746	0.621321	1.15405
0.475366	0.351433	1.07354	1.59421
0.596321	0.395223	0.221326	0.923256
0.553929	0.67242	0.202713	0.831754
0.754069	0.395559	0.390057	1.16436
0.426733	0.394782	0.207541	0.620947
0.96584	0.397658	0.413848	1.02351
0.667058	0.172387	0.305248	0.773117
0.586863	0.215762	0.0972398	1.42702
0.333011	0.210087	0.275603	0.677556
0.35672	0.474692	0.359571	0.178456
0.339333	0.292641	1.15935	0.462177
0.277016	1.41107	1.61915	0.386395
0.415331	1.03479	1.29787	0.940401
0.147254	1.1767	0.205629	0.933543
0.65646	0.789047	0.573388	1.02962
0.120669	0.850819	0.751564	0.652924
1.93686	1.17466	0.138733	1.05241
1.7091	0.779226	0.936856	0.458047
1.40021	0.624071	0.969509	0.765535
1.48997	0.582456	1.06171	0.910941
2.27215	1.01069	1.56426	0.977533
0.606709	0.915442	0.48578	1.18211
0.776117	0.449532	0.0107282	0.599978
0.59448	0.223432	1.84665	0.314764
0.749481	0.168811	0.622112	0.163785
0.383121	0.667264	0.923094	0.903548
0.487855	0.226178	0.648307	0.306019
0.446993	0.238745	0.411608	0.61136
0.711702	0.287509	0.484568	1.27455
0.604377	0.702115	0.519882	0.920062
0.619846	1.01388	1.11627	0.963189
0.448884	0.501199	0.589551	0.70207
0.920779	0.741214	0.47076	0.920715
0.940445	0.920364	0.862939	0.405568
0.74067	1.78002	0.736077	0.841108
0.86349	0.678535	0.964727	0.846216
0.971953	1.12918	0.903012	0.921391
0.286215	0.923266	1.62973	0.658477
0.207134	0.553981	0.896201	0.709557
0.231853	0.727274	1.4325	0.89135
0.0457588	0.858825	1.45797	0.676111
0.0542315	1.08516	1.31523	0.444287
0.202314	0.711289	1.29834	0.504464
0.132172	1.18145	1.96512	0.651246
0.100664	1.34704	0.703282	1.26184
0.615805	1.04445	0.641565	0.885472
0.178812	1.24679	1.05266	0.988334
0.234703	0.840144	0.974874	0.796769
0.277276	1.18051	0.696915	0.852678
0.229443	1.34518	0.161989	0.513842
0.239081	0.849602	0.517128	0.572503
1.12284	0.982448	0.765162	0.502714
0.460001	1.32704	0.883884	1.00737
0.488193	0.715304	0.765302	0.909985
0.388201	0.984314	0.281878	1.02015
0.492546	0.862065	0.87178	0.71926
0.873595	1.37378	0.829655	0.386162
0.460105	1.18269	1.47068	0.64784
0.67952	0.652417	0.528162	0.726305
0.83123	1.12711	0.812699	0.891023
0.454248	1.03642	0.911337	0.738831
0.664854	0.420979	0.635968	0.675457
0.925703	1.43644	0.69323	0.864153
0.468655	0.745335	1.18013	0.46915
0.742303	0.961952	1.4485	0.728683
0.413309	0.847658	1.13047	0.459752
0.887172	1.79248	0.832758	0.706619
0.654127	0.999341	0.475239	0.392297
0.91	0.760339	0.665708	0.300817
0.32236	1.00131	0.655095	0.402956
0.755181	0.765105	0.549364	0.437313
0.969856	1.27685	0.877099	0.381707
0.702297	1.88242	0.905859	0.514682
1.80031	1.71895	0.843441	0.820957
1.22524	1.33152	1.20917	0.402513
0.964129	1.90631	0.890183	0.57094
1.05044	1.64386	0.720614	0.327268
0.835428	1.60413	0.764534	0.482167
0.57541	1.31261	0.604831	0.420753
0.738677	1.79261	0.582019	0.466633
0.399577	1.64248	0.659761	0.354954
1.02235	0.911165	1.28157	1.12635
0.167153	1.56542	1.28801	0.542718
0.0848327	0.522602	1.11687	0.456859
0.986258	0.213431	0.904412	0.739111
0.532709	0.206097	0.962001	1.39346
1.54749	0.508894	0.827207	1.57756
1.07835	0.292821	1.15233	0.555195
1.46515	0.285514	1.45007	0.410723
2.00107	0.835143	1.28864	0.577004
2.00985	0.196303	1.22496	0.432578
2.24715	0.42116	2.0886	0.253655
1.34191	0.127665	0.444847	0.0748257
1.23687	0.0837975	1.65329	0.724929
2.08372	0.442614	1.58752	0.291069
1.81267	0.309509	1.21827	0.435191
1.99327	0.565952	1.97202	0.387002
1.39223	0.522162	0.911223	0.272875
1.4865	0.284634	0.936064	0.550251
1.96959	0.477285	0.914255	0.495018
1.49857	0.747071	0.753222	0.584724
1.5456	0.796225	0.932892	0.279826
1.14274	1.03873	1.37664	0.951178
1.55166	1.38371	1.0811	0.583186
1.10426	0.949851	1.24399	0.218529
1.4269	0.82952	1.21652	0.392157
1.37664	0.604715	1.71049	0.562753
1.33375	0.402012	0.238471	0.497001
2.14387	0.255381	1.34674	0.441348
1.33241	0.393591	0.602172	0.452009
1.57522	0.485627	0.673381	0.406595
1.60701	0.391959	0.503065	0.647702
1.49935	0.298962	0.874929	0.379213
1.26104	0.273312	0.659083	0.230588
1.03176	0.302073	0.918616	0.384903
0.98167	0.166349	1.16558	0.169291
0.922878	0.183296	0.897158	0.136169
1.06182	0.280256	1.0124	0.213094
1.18251	0.194801	1.35672	0.554123
1.25957		1.19123	0.552607
1.09166	0.808102	0.797142	0.32454
0.908394	0.699875	1.12203	0.717395
1.4951	0.606601	1.52788	0.466772
4.17745	1.15814	1.3268	0.761596
2.47356	0.671898	0.907373	0.554893
2.03162	1.26918	0.909963	1.13117
1.11369	0.729391	0.672379	0.992766
0.968999	1.009	1.10848	0.636343
1.23493	0.631177	1.14046	0.767006
1.20832	0.632932	1.05007	0.666524
1.9273	0.453473	1.62279	0.344015
1.57612	0.549671	0.468732	0.532921
2.18615	1.48954	1.29029	1.19527
2.40875	0.523861	0.76654	0.370395
2.54342	0.866463	1.44127	0.941381
1.95383	0.650529	1.46635	0.444218
1.86991	0.725361	1.23746	0.6853
1.77826	0.849667	1.10717	0.193268
1.69462	0.640692	1.55594	0.649358
2.98064	0.920274	1.39714	0.865809
2.08546	0.723779	1.13129	0.33156
2.95711	0.0914524	0.674408	0.780068
1.77927	1.40604	1.14897	0.77622
2.06629	0.875976	0.915351	1.19569
2.7512	1.03513	0.607	0.558812
2.81942	0.489447	0.81762	0.517621
2.86508	1.35693	0.812094	0.958035
2.81802	1.17142	0.784034	0.772279
1.99944	0.312153	0.557295	0.826787
2.87749	0.697643	0.589319	0.791381
2.14524	0.750999	0.734514	0.593029
1.17227	0.677901	1.02316	1.56163
2.09352	0.924911	1.77983	1.56823
2.3845	0.493391	1.00953	0.701837
2.12347	0.474689	1.39481	1.09115
1.87724	0.538337	1.49336	1.3956
1.43045	0.14808	1.22424	1.54402
1.41853	0.805234	1.20327	0.588993
1.32036	0.833739	0.996332	0.330391
1.64938	1.03073	0.184194	0.613156
1.19321	0.689234	1.27187	0.366802
2.06756	0.777524		0.288407
2.40549	0.729176	0.713232	0.270844
1.85154	1.5303	0.766764	0.331256
2.0162	1.27022	0.774277	0.240685
1.82267	1.11865	0.361125	0.311732
	1.55388	0.827525	0.547893
1.48171	1.0964	0.50659	0.537399
0.498484	1.15478	1.2592	0.658172
1.17398	2.2772	1.61136	0.392902
0.973887	1.13367	1.28975	0.453499
0.918475	0.960777	0.509466	0.293353
1.03478	0.975947	0.387165	0.570378
0.401635	1.07483	0.252633	0.384319
0.643335	1.07631	0.297979	0.585703
0.30277	0.778889	0.208092	0.646277
0.552596	1.07919	0.39968	0.533922
0.996729	0.926536	0.357574	0.662254
0.807647	0.590068	0.338192	1.31553
1.15179	0.637267	0.286914	0.847475
0.775226	0.707438	0.161141	0.954488
1.4082	0.837575	0.317982	0.662301
1.14882	0.818352	0.442459	0.634149
0.613103	1.61894	0.373173	0.209453
1.09317	0.629964	0.284894	0.500218
2.31409	1.11395	0.200837
0.31302	1.08528	0.425202	1.08861
0.628967	1.05195	0.330729	1.18308
0.377297	1.16529	0.62534	0.883364
0.485112	0.99933	0.117792	0.532761
0.977181	0.801276	0.27795	1.40524
1.32683	1.39475	0.316038	1.0565
0.700546	1.23468	0.368301	0.327025
1.37637	0.956421	1.32777	0.875617
1.49099	0.738884	1.44501	0.282716
0.861262	0.689474	0.710926	0.248282
1.10504	0.860547	0.721757	0.864708
0.722305	0.931759	1.28115	0.568076
0.556801	0.730845	0.811125	0.197599
0.813672	1.66631	0.760416	0.680194
0.659827	1.67647	0.366748	0.265356
0.6434	0.975753	0.547323	0.727819
0.937588	1.71102	0.973407	0.403229
0.388567	1.47038	1.31178	1.05604
0.513805	0.963747	0.683668	0.437641
1.14563	0.753014	0.936508	0.776324
0.775682	0.674281	1.10317	0.622258
1.20382	1.07802	1.02712	1.06044
0.363254	0.631286	0.577457	0.703878
0.469509	0.958175	0.654906	0.588805
0.834194	0.985872	0.97864	1.06863
0.333674	0.636183	0.427301	1.66676
0.28463	0.739621	0.858023	1.04412
1.77421	0.997076	0.697477	0.298498
0.912882	1.26762	0.590024	1.48544
0.904973	0.955141	1.88519	1.02484
1.46676	1.586	0.753057	1.39628
0.572816	1.20787	1.88224	0.578856
1.17636	1.23416	1.85524	0.379495
1.25334	1.09035	1.59991	0.914303
0.933752	1.29844	0.265202	1.17007
0.6434	1.46431	0.427224	1.11535
0.880115	1.11113	0.363794	0.646174
1.19888	0.918539	0.260305	0.920469
1.06495	1.16499	0.491924	0.909898
1.00876	0.694371	0.252169	1.79717
1.05936	0.989329	0.641562	0.828174
0.978288	0.65688	0.539497	1.83752
0.371425	0.670034	0.30096	2.22746
1.45787	1.01448	0.369909	1.31106
1.07052	1.03476	0.678485	1.05591
1.20445	1.08762	0.395638	0.681594
1.09187	0.562024	0.61806	0.823147
0.868045	0.597608	0.677993	1.60025
1.03188	0.765799	0.224288	0.67579
0.70655	0.371078	0.279167	0.765624
1.37845	0.536366	0.940499	1.85913
1.02388	0.836426	0.506306	1.56413
1.05745	0.796963	0.519779	1.32238
0.634428	0.541718	1.20197	1.11185
0.80173	1.05823	1.49054	1.41706
0.890085	1.11178	0.595361	1.91401
0.440556	0.886575	0.177881	2.52196
1.15227	0.631524	0.420513	2.12816
0.632672	1.57288	0.329151	1.02119
1.23477	2.10994	0.293729	1.7033
0.919189	0.651527	0.468294	1.75732
1.37004	0.588572	0.231724	1.16344
1.82295	0.879964	0.222138	1.16517
0.703213	1.05396	0.361332	0.899247
1.48299	0.32091	0.215608	1.11996
0.631567	0.23806	0.125489	0.993021
0.430025	0.837013	0.705381	1.54117
0.556237	0.430934	0.71888	1.71835
0.981495	0.45345	0.79563	1.04
0.647388	0.796356	0.672603	0.998254
1.87461	0.310312	0.550743	0.947831
2.19039	0.382325	0.658067	2.90387
0.918454	1.08231	0.247479	0.551778
0.388827	1.35338	0.298004	0.909016
1.00239	1.17747	0.283521	0.855795
0.870994	0.519418	0.423259	0.755027
1.67184	1.81016	0.458265	0.638374
1.45623	1.89039	0.332907	0.970246
1.17303	1.14975	0.659413	0.664908
1.91278	1.30048	0.325444	0.959518
1.63469	1.17396	0.497003	0.776506
1.53843	1.76608	0.419476	0.311426
0.344921	0.847436	0.692839	0.418129
0.585061	1.69682	0.289169	1.21954
0.309858	1.16783	0.229884	0.436344
0.559446	0.904172	0.486535	0.449326
0.383887	1.13005	0.544317	0.604792
0.668929	1.55139	0.471222	0.546649
0.775031	1.06183	0.813222	0.319148
0.879943	1.32397	0.569787	0.689005
0.791893	1.3078	0.42497	0.25152
0.600426	1.03617	0.562895	0.452512
0.433709	1.07102	0.502937	1.06039
0.559446	0.223344	0.523278	1.13219
1.45618	0.806065	0.750725	1.61271
1.62797	1.23013	0.614304	0.0806098
0.701349	0.690839	0.55862	0.27388
0.746901	0.83621	0.437952	0.354102
0.461468	0.71186	0.197807	0.298496
0.749113	1.16854	3.99848	0.480886
0.486174	0.56456	2.37997	0.437769
1.43052	0.825418	2.44096	0.52496
1.35569	1.20068	1.57273	1.42283
1.78619	0.437545	1.96928	1.38871
1.94054	0.801623	1.11351	1.04111
1.70263	0.849472	1.36964	0.616505
1.60745	1.27687	1.43017	1.26351
1.51095	0.742655	0.65931	0.673872
0.540894	1.00251	0.619562	0.358014
0.647972	1.06634	2.36626	0.376645
0.550386	1.09087	3.18915	0.32801
0.416718	1.09265	2.9887	0.527967
0.932951	1.99701	0.793634	0.245509
1.37775	1.3311	0.471506	0.565278
0.468187	0.859528	0.534677	0.910468
0.667347	0.424281	0.960813	0.740956
0.815709	0.911387	4.60289	0.54411
0.669578	0.42866	0.727301	0.424037
1.73303	0.945304	0.277431	0.640344
1.50427	0.362822	0.502547	0.941017
1.86243	0.649079	0.667058	0.409111
0.891883	0.85565	2.44956	0.382708
0.53268	0.584065	1.99661	0.568931
0.86618	1.0713	2.99432	0.99999
0.866289	0.589223	1.6998	0.863231
0.42324	0.81987	1.7616	0.891345
0.422547	0.937784	0.713334	0.450907
0.921334	0.391039	3.50329	0.641302
1.01279	0.222976	2.78488	0.78998
0.857989	0.211904	2.75159	0.539031
0.741159	0.535889	2.14552	1.22658
1.59263	0.476489	1.51311	0.949308
1.18683	0.57531	1.42327	0.512912
0.9074	1.56348	1.94398	0.618759
1.57581	1.43529		0.962989
1.9019	0.877017	1.26182	0.505424
1.76004	0.807994	0.627385	0.847787
2.45762	0.473908	0.440643	1.09765
2.8609	0.913902	1.3967	0.455596
1.27273	0.854327	0.653196	0.470832
0.868392	1.04822	0.65404	0.614665
0.694306	0.380743	0.813672	0.942416
1.6288	0.55108	0.652935	1.15004
1.07863	0.314993	0.342363	1.10174
0.802338	0.378381	1.50947	1.09179
1.09102	0.305436	1.00943	0.538823
1.08523	0.361564	0.50596	1.00354
0.889326	0.282789	0.190253	0.795395
1.47272	0.872206	1.38222	0.773655
1.23492	1.31291	1.05197	1.12398
1.81276	0.945304	0.510597
2.18007	1.38803	0.0436021	0.516125
1.72746	0.761162	0.429785	0.264044
0.683232	0.656967	0.2933	1.16871
1.98429	0.32054	1.05589	0.718124
1.8783	0.91895	1.49417	0.638676
0.982448	1.07108	0.996403	0.680826
1.57152	0.800344	1.06491	0.180847
1.58075	0.40287	0.930111	0.307322
1.75986	0.451847	1.10192	0.317593
1.44741	0.591865	0.707548	0.249762
1.1968	1.23947	0.622595	0.838702
1.56361	1.81595	0.342493	0.462899
1.51502	1.90086	0.441445	0.487432
1.32533	0.430588	0.473367	0.175884
1.34627	0.857059	0.106189	0.503447
1.61011	0.281186	0.905688	0.896067
1.13285	0.206615	1.6638	0.882544
1.90123	0.210429	1.77761	0.682864
1.15263	1.1457	1.23139	0.536713
1.92307	0.521196	1.181	0.842279
1.76727	0.240162	0.971612	0.596417
2.33931	0.827239	1.21873	0.649166
0.96977	0.325786	0.546877	0.731429
1.36672	0.954362	0.773885	0.896803
1.84059	1.27311	0.893077	0.340002
0.307212	0.458392	0.80546	2.84887
1.04261	0.209388	0.390583	3.0774
0.958328	0.43412	0.516537	1.99105
1.5396	0.748485	0.693115	2.08142
0.44049	1.26478	1.69515	0.800452
0.678182	1.20215	0.9647	0.681499
0.92621	1.21039	0.537882	1.14713
0.970095	0.683775	1.07793	2.08227
0.953148		0.99569	2.75848
0.660499		1.29356	2.90563
0.801493		0.75438	1.9815
0.0482197		0.61954	2.42691
0.407661		0.702975	0.652198
0.261032		0.83062	1.06833
0.265756		0.391407	1.56419
0.369561		0.342928	1.18625
0.128924		1.07592	2.37488
0.362692		0.50763	0.901029
0.167433		0.351964	0.779994
0.451068		0.588832	1.0939
0.207742		1.43707	1.73845
0.0526623		0.463139	0.789379
0.260056		1.05149	1.06714
0.656186		1.37197	1.08953
0.509861		0.861349	1.29306
0.902612		0.972502	1.78418
0.847761		1.25156	0.391927
0.702283		1.14232	0.667434
0.295208		1.05234	0.630398
1.53102		1.33996	0.48494
1.34159		1.13014	0.50102
1.04813		0.834152	1.069
1.21015		0.900444	0.847653
0.883498		0.824032	0.44929
0.761466		0.564517	1.04265
0.918648		0.397778	1.68397
1.6346		0.744996	0.868826
1.03151		0.848347	0.827
1.0344		1.29679	1.03606
1.19834		0.737107	0.485525
0.98247		0.937199	0.355715
1.33125		0.735201	1.04319
1.02555		1.56612	1.65664
0.286474		1.87895	1.695
0.581767		1.72493	1.10951
1.09761		0.802794	1.00828
0.936441		0.449918	0.62173
0.976163		0.65959	0.626562
0.745732		0.562848	0.259601
0.596221		0.837122	0.297354
1.23106		1.20274	0.976685
0.475837		2.65831	0.522237
0.541652		2.10793	0.964245
0.775508		0.21173	0.656014
1.14006		0.660868	0.292564
1.10519		0.230843	0.211687
1.61659		0.384364	0.89546
1.3838		0.354218	0.447991
1.05017		0.693592	0.546856
1.11662		0.676233	0.851315
1.47226		0.400942	1.02321
1.82288		0.250283	1.22931
1.10001		0.729956	1.33563
0.963248		0.259494	0.909178
0.527306		0.347978	1.70244
1.52813		0.642209	2.39496
1.47794		0.197275	0.705939
0.436938		0.421205	1.37357
1.69572		0.935574	1.14141
0.869367		0.557127	1.16371
0.764975		0.603309	0.608511
0.563997		0.584303	0.80249
0.557212		0.302445	0.825246
0.391665		0.70486	1.04922
0.499675		1.13103	1.20358
1.09757		0.620796	0.925821
0.892317		0.372228	0.818722
0.874524		0.298089	0.908247
0.927641		0.677815	0.700657
1.88887		0.650097	1.40361
1.6099		1.49415	0.838919
0.702845		0.918865	1.26784
1.6786		0.480389	0.787277
1.65517		1.29397	0.852767
1.62648		0.505051	0.499285
0.387179		0.152242	0.459151
0.960951		0.460689	1.12949
0.547482		0.592429	1.03548
1.2897		0.481948	0.970811
1.27802		0.582135	1.61688
0.951415		0.399055	1.50386
1.13714		1.15617	0.783028
1.16305		1.27412	0.809663
0.60385		1.39568	1.01905
1.19004		1.80481	0.327193
1.10808		2.75982	1.31573
0.398254		0.79122	0.69138
0.10517		1.08389	0.344942
0.359939		0.704817	0.594228
1.02176		0.993045	1.19732
0.721547		1.06263	0.794427
1.38367		0.842147	0.708111
0.593686		0.621317	0.148058
1.40287		0.641797	1.16165
1.62255		1.04965	0.633713
0.914573		1.25945	0.0456178
0.974279		0.973325	0.0721433
1.0959		0.710602	0.146975
0.817789		0.723325	0.50102
0.948402		0.683492	0.560723
1.75078		1.15777	0.363601
1.6076		0.896153	0.0278474
1.02893		0.909503	0.556498
0.638589		1.03013	0.700395
0.352115		0.836839	0.835061
0.771651		1.00447	0.308687
0.539421		0.705986	0.203364
1.15495		1.58495	2.04142
1.24157		0.349624	1.93115
1.41447		0.729544	0.24274
1.00356		0.886032	0.626887
1.19875		1.67173	1.42205
1.1063		0.96925	2.06508
1.19855		0.538186	0.313303
1.80128		0.746643	0.971547
1.11891		0.952499	1.97723
0.30238		0.334865	1.3747
1.01875		0.417845	0.625738
1.21286		0.317962	1.6338
1.11885		1.01207	1.67331
1.1463		0.469467	1.02505
1.23841		1.6231	1.41399
1.31016		0.866962	0.320953
1.46867		0.480193	0.903305
2.15604		0.344942	0.544384
1.94431		0.565947	1.00434
1.63155		0.691966	0.291241
1.1159		0.814496	0.153562
1.50752		0.912363	1.46216
1.35762		0.800322	1.03964
1.31558		0.7015	0.361153
1.37949		0.925214	0.175407
1.7305		0.700158	0.510273
2.12349		0.754076	1.15558
2.07074		0.396672	0.532118
1.89056		0.563563	1.51953
1.94821		1.41145	1.06521
1.02291			1.10372
1.22144			0.769874
2.14386			0.994302
1.84078			1.4452
2.09605			0.544731
0.996209			1.14409
1.14227			1.4127
0.968492			1.45731
0.410629			1.45165
0.405123			1.37908
1.40558			0.356754
0.480302			0.13265
0.661366			1.01203
0.307625			1.23713
0.723606			0.411214
1.26981			2.61911
0.280146			1.35491
0.967106			0.839526
0.290353			1.09637
1.53611			1.5345
0.71964			0.194326
0.789053			0.804287
0.532529			0.163467
0.539268			0.39847
1.13257			0.267056
0.404431			0.369973
0.65339			0.529908
1.32735			1.06229
0.75167			0.74946
0.71873			1.70276
1.85348			0.754184
0.99517			0.633172
0.964266			0.639347
0.896543			0.923308
1.40367			1.46893
1.27315			1.80028
0.773796			1.00395
1.00234			0.915115
0.831724			1.55327
1.25897			0.793626
0.378663			1.98977
0.586817			2.82791
0.819176			1.59208
0.406207			1.30639
0.615032			1.25681
1.33259			1.07234
0.82908			0.449918
0.560312			1.69034
0.258063			1.63983
0.664747			0.413012
0.670555			1.65424
0.69435			1.75193
0.151612			0.742351
0.287079			0.650639
0.422591			1.91932
0.887701			0.443222
0.80678			0.158808
0.351921			1.21552
0.376171			0.856689
0.30524			0.861089
0.503814			0.434597
0.377579			0.600469
0.566467			1.36289
0.273687			0.884126
0.69045			0.321082
0.761076			1.49461
0.993176			1.15946
2.20079			1.48041
0.749743			1.27423
1.09499			0.962056
0.46199			1.58008
0.667651			0.929072
0.854198			0.665852
1.38658			1.31564
0.844402			0.68917
0.427705			0.980975
0.425431			1.39336
1.03316			0.424606
1.02493			1.36198
0.967452			1.76149
0.440688			0.915765
1.56396			1.69565
0.92554			0.821799
1.18657			1.42576
1.01038			1.21453
0.438846			0.798957
0.716476			1.85498
			1.68731
			1.85964
			0.183404
			1.23982
			1.08305
			0.541739
			1.03856
			1.04883
			1.03385
			0.920468
			1.23633
			0.635533
			0.612973
			1.21955
			0.501214
			0.618477
			0.781403
			0.406488
			0.44838
			0.564062
			0.558817
			0.272647
			0.662624
			0.85242
			0.221004
			0.909784
			0.66466
			0.68152
			0.544059
			0.473367
			0.411257
			0.604912
			0.684923
			0.484701
			0.430566
			0.704363
			0.542738
			0.636813
			0.379704
			0.691186
			1.18427
			0.670772
			0.267078
			0.602268
			0.234462
			0.535478
			0.53875
			0.519224
			0.467885
			0.831833
			0.472695
			0.975276
			0.709867
			0.327866
			1.18172
			0.64988
			1.15309
			0.903414
			1.14375
			1.65426
			1.06584
			0.955164
			0.377125
			0.242286
			0.752884
			0.771262
			1.02443
			1.18083
			1.46791
			1.1125
			0.934273
			1.31794
			1.21607
			1.13335
			0.288012
			0.740207
			0.284609
			0.81896
			0.414702
			0.692487
			0.103849
			0.434034
			0.383691
			0.805675
			0.608119
			0.320065
			0.350729
			0.530189
			0.406056
			0.693916
			0.628058
			0.534264
			0.820087
			0.507331
			0.65415
			0.721482
			1.08948
			1.38473
			0.170814
			1.55065
			0.467862
			0.931065
			0.669427
			0.172028
			1.12201
			1.40682
			1.14661
			1.0075
			0.95705
			0.689538
			0.555762
			1.3259
			1.0671
			1.3846
			0.79135
			1.88506
			1.52568
			1.22634
			1.2302

## Sheet: Fig. 7 D
norm EEA1 intensity at PI3P organelles
Pclowt/wt	Pclogt/gt	Pclowt/wt + Rab5Q79L	Pclogt/gt + Rab5Q79L
0.173249	0.00658624	4.86105	-0.0508106
0.687817	0.0741752	0.997513	0.0358424
0.102401	0.217223	3.09994	0.111717
0.0992539	0.103654	0.914091	0.060335
0.0857893	0.0627293	1.87331	0.0144542
0.415884	0.470385	3.16917	0.0689264
0.247662	0.14618	3.06323	0.0143283
0.257103	0.643843	2.01778	2.18983
0.425868	0.561215	2.76969	0.122216
0.47388	2.13115	1.69428	0.0748583
0.172859	2.57071	0.692774	0.0281974
0.117663	3.72646	0.79931	0.872763
0.0919576	1.56175	1.11304	0.167596
2.00306	0.0946171	1.5701	0.0208588
0.0454494	0.25539	4.90657	0.0731462
0.34785	0.339508	0.594063	0.400735
0.194679	0.356719	1.16171	0.378052
0.0853022	0.825572	0.813862	0.827299
0.873849	0.105909	2.18292	0.15959
0.503846	0.61811	1.46449	0.593089
0.841419	0.108945	1.30057	0.547751
1.23178	0.138855	2.43833	0.0621173
0.0589985	0.00792271	5.06285	-0.0027152
0.00860583	0.0424143	2.74236	0.337378
0.0178093	0.420312	8.73008	1.56249
0.0221684	0.241341	2.01533	0.684587
1.28415	0.375546	1.58081	0.229505
1.07828	0.171231	0.534633	1.41897
2.3403	1.61853	1.26669	0.0799832
2.00871	0.0280581	1.73331	1.68668
0.323132	0.0814033	2.41755	0.545857
0.824208	0.0656126	5.11148	0.138564
0.305323	0.339996	1.96879	0.592671
0.111841	0.0717252	1.96917	1.21975
0.0023943	0.0322356	1.50264	0.904512
0.269426	0.0521058	0.0717531	0.713522
0.138382	0.262993	1.34419	1.28294
1.08721	0.124207	0.929756	2.39785
0.0900081	1.20379	0.465831	1.45457
0.343504	0.186728	1.70468	0.447215
0.125028	0.373805	0.0945748	2.09478
0.110783	0.0577178	1.5888	1.21592
0.514986	0.240074	0.326447	0.530958
1.27429	0.214786	0.823107	0.63464
0.0487632	0.249152	6.64187	0.577619
0.0327919	0.279828	0.0595414	0.817636
0.20586	0.142128	0.255348	1.46337
0.963844	0.283031	0.067882	1.10431
0.13912	0.247369	0.0368445	0.179029
0.612694	0.238207	0.606692	0.773634
0.0543752	0.296969	0.344953	1.50045
1.61295	0.316964	0.562719	0.739589
1.78432	0.287152	1.12066	1.08426
0.138799	0.160981	0.903063	0.668629
1.27288	0.709261	0.239141	0.848883
0.400804	0.213268	0.0929741	0.274746
0.123747	0.110477	0.58976	0.13014
0.342989	0.253315	0.908257	0.314138
0.325193	0.363236	3.10745	1.16891
0.3189	0.0264977	1.78539	0.754808
0.716697	0.0765148	0.417207	0.143214
0.598226	0.00499901	0.927208	0.120309
0.641448	0.291636	2.26033	0.817483
0.231955	0.0178371	0.278184	1.6001
0.321615	0.342892	1.49722	0.333076
0.530498	0.739198	2.40382	0.911544
0.0493483	0.0779771	0.399049	0.549686
0.535649	0.123915	0.231607	0.923073
0.133718	0.105032	1.10217	0.878054
0.113846	0.16073	0.0747469	0.401556
0.0301747	0.0355494	0.548558	0.706518
-0.0317062	0.219812	0.286846	0.560269
0.0199816	0.150357	0.532113	0.379166
0.973381	0.0803022	0.150232	3.30484
0.280928	0.0259549	0.698372	0.540328
0.61488	0.0253006	0.172679	0.589524
0.013479	0.203075	0.176368	1.566
0.25514	0.0597777	0.0276401	0.239391
0.80328	0.114112	0.274522	1.28535
0.0300911	0.0449066	0.259108	0.710654
0.0690234	0.0971238	1.51204	0.194791
-0.0214862	0.0565331	1.08792	0.688235
0.114459	0.0191323	0.210706	1.37278
2.41574	0.591277	1.18639	1.37491
0.75595	0.0618386	0.111911	1.46471
-0.0143427	0.568846	0.0876407	0.219716
0.0977502	0.15303	0.0602091	0.561828
0.491884	0.954152	0.113471	0.520918
-0.0249951	0.402558	0.145803	1.63704
0.0220281	0.137463	0.431341	1.51825
4.22152	0.600956	1.11048	0.0909142
0.91572	0.196823	1.03743	1.90149
1.89379	0.269551	0.351956	0.409772
3.36469	0.464536	0.842658	0.506214
0.502885	0.437078	0.171118	1.12531
2.30018	0.00598767	0.106453	0.022962
1.93252	0.30148	1.35e-05	0.00121156
1.21534	0.35179	0.576044	0.0682586
0.90738	0.338659	1.27893	0.241034
0.0978338	1.93217	0.68641	0.216764
5.94847	2.19544	0.299448	0.191324
0.306493	0.488961	0.444778	0.227486
1.03642	0.536457	0.840165	0.197743
0.474883	1.46082	0.221819	1.1431
0.516351	0.773063	1.34401	0.36144
1.00818	0.411081	0.104309	0.9154
0.311117	0.783993	0.0872372	0.706616
0.24329	2.55515	0.756472	0.13479
0.707395	0.744922	0.568623	1.28975
1.19526	4.2907	1.49181	0.147796
1.95286	0.729298	1.37041	0.67775
1.15443	1.19317	0.37347	0.0665456
0.277837	1.36621	0.37258	0.55648
0.00221463	1.95391	0.807833	0.187633
2.74433	0.600941	0.751759	1.92369
1.63889	0.830738	0.150315	0.234141
1.00069	0.303513	1.53585	0.545258
1.50399	0.519914	1.37547	0.0646105
2.75437	0.519093	1.31239	1.7949
0.561327	0.481594	1.2559	0.0898698
0.845847	0.240212	0.809156	0.992738
3.18623	0.468143	0.983574	0.585346
0.710194	0.483488	1.42443	0.496453
1.10628	1.62946	0.090231	4.76285
2.46201	1.00262	1.0426	0.156777
1.90679	1.18419	0.365254	0.15434
3.50214	0.232443	0.992013	0.654872
0.735439	0.623764	0.965347	1.45129
1.95107	0.099226	0.702048	2.02158
1.49708	-0.024605	1.3842	0.805675
0.574819	0.0798987	1.05148	0.583564
0.978965	-0.0767665	0.656739	4.75894
1.26645	-0.0235049	1.93324	1.8505
1.10331	0.336807	0.84121	6.48885
2.03499	0.0105966	0.167513	0.616788
0.255306	-0.027863	1.9707	0.460861
1.04242	0.02551	0.280803	0.127271
1.13713	0.0404783	1.30766	0.195974
0.997568	0.914717	0.475565	0.0543483
0.674477	-0.0370252	0.970959	0.123344
2.05526	0.518244	1.37027	0.401571
1.22554	0.145414	0.684643	0.20153
0.692593	0.00920441	1.16578	0.24251
0.0203439	0.025412	1.28093	0.0824198
0.0362037	0.136934	0.903843	0.0132984
2.01657	1.16768	1.24355	0.113305
0.981625	0.243443	0.656167	0.0474555
2.70251	0.129679	0.699792	0.00221463
0.278393	0.483586	0.350008	0.400443
3.66206	0.0758604	1.48542	0.378929
4.32474	-0.0675198	0.637131	0.0215554
5.78298	0.450334	0.861289	0.0989762
0.110283	0.945338	0.913325	0.166538
0.694626	1.2716	0.813695	0.481051
1.39514	1.36377	0.0758893	0.00828493
2.28005	-0.0540274	0.108097	0.280051
0.920747	0.152906	0.0312748	0.11822
0.483558	-0.0622008	0.0216111	0.196379
0.305101	-0.0614495	0.0912754	0.178457
0.0911918	-0.0613659	0.246869	0.198829
0.398841	-0.030119	-0.00907854	-0.000208492
0.981612	0.00154592	0.298571	0.228962
0.370616	-0.0863187	0.266641	0.665579
0.773857	0.116883	1.10661	0.551691
0.485396	0.427414	0.235785	-0.0302717
1.46805	-0.09381	0.704068	0.210289
1.35351	-0.0865406	0.306355	0.31173
1.92361	1.19551	0.117774	0.0910525
0.443803	1.3328	0.103167	0.0600986
1.58917	-0.000668713	0.0721153	0.330151
2.75096	0.0381675	0.228113	0.0319848
2.31317	-0.0129217	0.0633845	0.313679
2.23336	-0.0497807	0.516253	0.127006
3.01677	0.245476	0.164449	0.0478869
1.18393	-0.00902282	1.93386	0.0989896
3.73628	0.0458818	0.0384318	1.56978
0.721417	1.31597	0.067074	0.105033
0.340775	0.0777273	1.03285	0.355285
1.55532	0.0850235	0.137825	0.227667
0.774748	1.18643	-0.0132984	0.0808037
1.41922	0.104114	-0.0159165	0.197673
1.50426	0.790594	0.913005	0.243791
3.35708	0.164504	0.138243	0.0473854
1.98971	0.0512843	0.106174	1.43618
1.67398	0.256226	0.277976	0.241814
1.95033	0.0768914	0.819362	2.31259
1.9995	0.0206917	0.232442	1.25026
1.73436	0.136001	1.98376	2.30497
1.90219	0.890448	0.0275565	0.281526
2.83376	1.27489	0.145288	1.33387
1.67174	0.280022	0.867068	0.387186
1.6646	0.184848	0.97515	0.408922
3.60301	1.67139	0.800397	0.448329
0.302149	0.317716	0.377035	0.924074
1.47138	1.20933	0.0566033	0.159269
1.0392	3.39596	0.398298	0.167972
0.318789	2.7629	0.622107	0.523103
0.728728	0.0282252	0.921262	0.238054
1.03987	0.0925149	0.427929	0.864018
1.1787	0.394663	0.309361	0.66991
2.56543	0.134233	0.16236	0.519329
0.351957	1.24918	1.00356	0.209842
0.107483	0.393132	0.243624	0.0663226
0.171579	0.0529273	0.0736324	0.205818
0.644498	0.0893683	0.266363	0.160285
0.515988	0.632022	0.216025	0.573803
0.378873	-0.00839638	0.0368301	0.0270415
2.82269	0.115282	0.716237	-0.00103093
0.231189	0.432817	0.153101	0.246311
0.0801494	0.546998	0.0539716	0.178275
0.377439	1.19342	0.765001	0.42371
0.34292	3.12989	0.404188	0.317006
0.652184	0.0334472	0.386824	0.3971
2.04439	0.003676	0.901795	0.557051
2.12231	0.623932	0.461306	1.77487
0.578439	0.620827	0.0175028	0.400958
0.754627	0.62861	0.121882	1.17615
0.882357	0.502635	0.155899	1.96903
0.0878781	0.0181436	0.135123	0.248525
0.0964829	0.174963	0.0313574	0.387451
0.0723238	0.35147	1.87949	1.62501
0.32174	0.0747892	0.310768	0.282432
0.0386268	0.128329	0.113972	0.296468
0.627496	0.000668713	0.458925	0.28083
2.45158	0.439737	0.0707923	0.227875
1.751	0.240616	0.839832	0.0877532
0.582743	-0.0209002	0.409758	0.14256
0.0303832	-0.0406733	0.759265	1.01117
0.169908	-0.0416062	0.498179	0.119961
0.217459	0.254931	2.70976	0.302122
3.67952	0.13465	0.697634	0.503721
2.43911	0.0239363	0.476847	0.658785
0.30627	0.461835	1.04731	1.31084
0.75978	0.0203583	0.989967	0.548711
0.39419	0.327004	1.78563	0.689669
0.722671	1.08968	1.58105	0.0965531
1.44171	0.142713	0.582952	0.0559211
0.0266793	0.170993	0.59593	0.28143
1.17131	1.9382	0.565588	0.0811391
0.519804	-0.00286797	1.12937	0.106982
0.198537	0.0740234	0.471012	0.135598
0.280775	-0.0258713	0.11854	0.49442
0.0258165	-0.00128074	0.830433	0.374765
3.06879	0.0748583	0.925983	-0.0503783
1.85723	-0.0196338	0.448218	0.0602379
0.443998	-0.0325834	0.163419	0.0926686
0.768427	0.19156	0.115323	0.58128
0.993977	0.439263	0.40171	0.041245
0.756549	0.254401	0.605718	0.958705
0.423362	0.121616	0.114098	0.219187
3.25878	0.210845	0.229505	0.739644
1.57903	0.139927	0.607598	-0.0383203
1.25885	0.925397	0.277322	0.0097338
0.804199	1.98554	0.452618	-0.0284059
1.08623	0.0790493	0.581141	0.338493
1.40827	0.215928	1.15531	0.0215698
2.10717	0.129136	1.20151	1.20544
0.246645	0.229797	0.49733	0.731708
2.57739	0.0132561	0.808864	0.518119
0.77511	0.939224	0.651656	1.20971
0.377718	0.00192159	0.89241	0.863657
1.13378	-0.00211663	1.55664	1.84007
1.88419	0.292972	0.535511	1.28256
0.557288	0.158935	0.351331	0.0669635
2.32709	0.0963023	0.998544	0.195097
1.00668	0.250141	0.458313	0.599828
0.574806	0.0502956	2.14806	0.112385
0.948874	0.0595827	0.235548	0.792586
0.0906355	0.23829	0.163614	0.176647
2.37476	0.839093	0.316547	0.142991
1.61732	2.18245	1.05769	-0.00275652
3.08181	0.902951	0.96266	0.195292
1.64234	0.347724	0.160508	0.477626
1.57673	0.048081	0.209927	1.23314
1.80561	0.637201	0.185169	2.82756
0.608809	0.150092	0.108514	1.04791
1.39435	0.0606693	1.02188	0.416288
1.64811	0.0346856	0.696604	0.255056
2.03726	0.05134	0.462421	0.650764
2.24487	0.140137	1.75178	0.629807
1.58187	0.153866	0.426245	0.17971
1.7929	0.952467	0.741246	0.0546951
1.58463	0.182829	0.73303	0.944405
0.729493	0.177398	0.658798	0.478085
0.662711	-0.00563986	1.33504	0.398033
2.24785	0.175714	0.794006	1.95974
1.65705	0.309333	0.579039	0.0573825
3.88214	0.237121	1.24293	0.176549
2.01126	-0.0103045	1.81539	0.443538
2.09613	0.040534	0.848381	1.97818
0.981235	0.278045	0.537348	0.39128
0.819209	0.534953	1.3658	0.31106
1.89324	0.109363	0.535942	0.0687592
2.19216	0.433192	0.420438	0.0821412
0.0473018	0.385738	2.74662	0.295256
2.85243	0.300645	0.783534	0.524412
1.08967	0.446476	0.922836	0.0727552
0.429808	1.26136	1.12391	0.248359
2.2873	0.875534	1.07048	0.187828
1.16234	0.228655	0.712491	0.430519
0.796526	1.5758	1.00984	0.181144
0.439388	1.16019	1.85879	0.08707
0.197116	0.301996	1.41668	0.269398
0.0758191	0.027055	0.423989	0.178276
0.296718	-0.000639889	0.200722	0.411958
0.125446	-0.0105265	1.01878	1.39393
0.509972	0.0202603	0.0371366	0.0715302
0.372565	0.0547653	0.211806	0.638315
0.423556	0.113124	0.0017131	0.154075
0.0604877	0.0268744	0.80477	0.589245
0.125112	0.0332243	0.428946	0.76177
0.0891031	0.0361211	2.15566	0.392616
0.0358972	0.0332944	0.766964	3.2382
0.142852	0.288782	0.65121	2.0104
0.00595981	0.0515216	0.866358	1.06566
-0.0180322	0.0477899	1.32993	0.499724
0.345691	0.0297568	0.438832	1.30285
0.844162	0.0637468	0.52955	0.13064
0.185614	0.10662	1.07666	0.439194
0.254541	0.146529	0.501674	5.55771
0.161999	0.577298	0.302762	0.834428
0.884557	1.10386	0.542542	1.09583
1.09741	0.10502	1.06857	0.23719
0.0850927	0.132117	1.15	0.533659
0.18191	0.715931	0.850275	0.721696
1.14153	0.0622844	0.581377	0.130361
0.220453	0.918603	0.0247299	0.603643
0.725678	0.130418	-0.0393368	0.418377
0.0654032	0.0897026	0.858797	0.83564
0.649497	0.191937	0.102471	0.148812
0.597976	0.0582472	1.02116	1.10736
1.02958	0.0828233	0.959499	0.0549459
1.00065	0.10488	0.827926	0.395304
0.0522028	0.0908863	0.0693021	0.352013
0.401194	1.02638	1.96668	0.0369694
0.110798	1.43473	0.527699	0.460972
0.129722	1.40727	0.00665542	0.311881
0.261656	0.171565	2.61059	0.255473
0.553334	0.587742	0.265179	0.0681328
0.711712	0.640502	-0.014091	0.0688428
1.62328	1.39935	0.0757634	0.70422
0.306562	0.312592	0.0370117	0.215928
0.950184	0.614741	0.0982104	0.530511
1.06882	0.774804	0.0294781	0.639485
1.70673	2.86441	0.102749	0.572828
0.674797	0.81978	0.022447	2.49414
0.95975	0.500324	0.0281138	0.187313
2.58509	0.403506	0.0611709	2.92878
1.95545	0.408324	0.0527044	1.53514
0.93119	0.252021	0.477808	1.2095
1.86647	1.04526	0.0517858	1.26496
0.490284	0.214369	0.138564	0.529773
0.26037	0.655512	0.10733	0.307259
0.233551	0.113513	2.73587	0.603964
0.404264	0.434739	0.484227	0.167345
2.38181	0.268619	0.586363	0.0579263
1.62086	0.0761122	0.11964	0.0823641
1.7142	0.0569933	0.541387	0.534954
0.518588	0.367511	0.0483885	0.186756
1.58853	0.0660171	0.0799967	0.256184
0.824776	0.0599036	0.0560748	0.41917
0.80787	0.0534711	0.0565197	0.768899
0.236248	0.50283	0.0127276	0.292778
1.06036	1.27124	0.0160693	0.709177
0.263729	2.78817	0.394803	0.42481
0.333774	0.742318	0.338548	1.95751
0.703182	1.84218	0.0914426	0.348016
0.699493	0.0428466	0.0398941	1.40259
0.372159	2.281	0.160467	0.0760978
0.744042	1.2327	0.0746633	0.0994768
3.5468	2.68517	0.592421	0.129777
0.67862	3.50141	0.0268052	0.565281
0.238505	2.00394	0.0111125	0.348309
0.720255	0.900139	0.0683836	0.382675
1.57851	0.116967	0.633553	2.43483
0.858807	0.796193	0.00977512	0.172121
1.30217	0.510293	0.00380186	0.775653
0.257174	1.54302	0.00110011	0.153365
0.539734	0.611288	-0.00396808	0.291148
0.0610171	1.42338	0.0769058	0.73775
1.16527	1.61207	0.0200374	0.90504
1.71828	1.02579	0.0307877	0.587937
2.81923	0.224896	0.00847997	0.848938
2.87584	1.41125	0.0135068	0.144816
0.21747	-0.0145647	0.0249806	0.222626
3.46387	0.19117	-0.000292081	0.098196
-0.00242427	0.48619	0.000571672	0.107373
0.210805	0.35832	0.0594722	0.213936
0.994775	0.262743	0.0170301	0.123231
0.668103	0.13316	0.69031	0.0696364
0.30178	0.0447951	0.205638	0.111118
0.417373	0.0798574	0.75531	0.105742
0.827584	0.0544453	0.136782	0.309153
0.686718	0.184514	0.0705982	0.675327
0.847962	0.157292	0.133648	0.0914138
0.753625	0.236731	0.079106	0.419546
4.04535	0.366703	0.44482	0.156038
1.8331	0.280496	1.12403	0.395011
3.66174	0.188691	1.06761	0.141403
0.270887	0.382076	0.339954	0.378706
0.240873	0.224659	0.0368589	0.311993
0.609453	0.0667262	1.80547	0.770765
0.794655	0.517673	2.31121	0.0598748
1.28885	0.619238	1.35596	0.0386816
1.16357	0.549866	1.25288	0.206166
0.542326	0.295215	2.70012	0.0890195
0.993399	0.254778	0.0259136	0.36545
1.16373	0.145093	0.0819884	0.0547374
0.870704	1.8364	0.19447	0.188803
0.516388	0.258398	0.57145	0.280036
1.19143	0.17492	0.0492378	0.593408
3.25769	0.185712	0.333145	0.455764
3.06957	0.825684	0.0448374	0.174001
0.565839	0.205262	0.0453802	0.0990031
0.276614	0.199079	0.125725	0.319833
0.953638	2.19238	0.198968	0.372593
0.460216	0.326726	1.65283	0.0944499
1.67367	0.0605857	2.4736	0.173096
2.24183	0.499808	1.77713	0.072073
1.2042	0.541247	1.27612	0.0438478
0.211523	0.555924	0.0861515	0.0348384
0.663421	0.197325	0.66129	0.116492
0.0736286	0.330249	2.13497	0.164768
0.425246	0.0921382	1.11116	0.909941
0.276116	0.238388	0.988239	1.72961
0.435213	-0.00451189	0.535385	0.691033
1.02121	0.0710565	0.38628	1.22773
0.16884	0.0806231	0.41555	1.39028
0.388791	0.0194666	2.46342	0.0328332
0.401178	0.264218	4.51062	0.103069
1.15828	0.0654454	3.58535	0.398046
1.00788	-0.00289679	0.200332	0.149117
0.948129	0.0471202	0.0689543	0.0378745
0.3726	0.199135	0.215315	0.193425
2.51981	0.365687	1.43015	0.584009
0.250125	0.382312	0.0700688	0.0371222
0.0950481	0.0518829	1.88992	2.40684
0.130018	0.226733	0.499209	0.590693
0.252109	0.73406	3.41831	0.373344
0.596127	0.237985	0.425102	0.852488
0.268022	0.202087	0.323829	0.886896
0.387191	0.0449623	2.50897	0.527155
0.381302	0.697244	0.256532	0.166704
0.475525	0.853031	0.770293	0.877873
0.182003	0.508873	2.32459	0.283308
0.312244	0.117161	0.454219	0.0342542
0.210474	0.261851	1.87834	0.574819
0.332182	0.088616	0.919188	2.10624
0.726148	1.26179	0.171216	1.10624
0.331631	0.332978	0.116312	0.211207
1.05078	0.123441	1.5005	0.700864
0.339173	2.48124	2.2438	0.538852
0.313954	0.077588	0.646322	1.64893
0.317807	0.192493	1.95536	1.11012
0.406688	1.82424	0.166203	1.5872
0.667719	0.143993	0.182287	1.18421
0.725214	0.183762	0.267992	0.0330427
-0.0122771	2.18082	0.191936	0.4698
0.273475	0.306047	3.61971	0.384735
0.273475	0.189959	4.15186	0.199149
0.146927	0.146514	3.96687	2.39561
0.215984	0.466152	0.99445	3.6256
0.0669106	0.151318	2.26331	0.507703
0.885519	0.491829	0.0255792	0.364502
0.339063	0.213672	0.285092	0.470983
0.560663	0.0759959	0.0653897	2.36518
0.180961	0.612173	0.0802888	2.46902
0.0703798	0.00804037	1.29649	0.469312
0.224906	-0.122144	4.9796	1.27492
0.164991	0.167685	0.215246	0.322993
0.460714	0.0534175	0.617164	2.66253
0.0444424	0.144776	0.279424	1.65387
0.283666	0.0379979	0.488891	1.79404
5.16601	0.125283	0.0655146	0.893134
0.599543	0.0618987	0.0601121	1.02766
0.589189	0.24875	0.523271	2.88978
0.218739	0.0375572	0.0503091	0.0664476
0.251394	0.077759	0.486788	0.265958
1.07567	0.115537	0.136864	0.0922641
0.179088	0.11548	0.0594165	0.201683
0.196932	0.210585	0.468895	0.0379024
0.417867	0.528061	0.0740225	0.0497518
0.586988	0.769044	0.36712	0.0691214
0.13696	0.284323	0.604075	0.08636
-0.047524	1.28648	5.32666	0.798991
0.517764	0.354756	0.0403533	1.24467
0.703239	0.153424	0.116758	1.68636
0.460216	0.372931	0.131378	0.464634
0.825984	0.210805	0.0481233	0.319651
1.37024	0.101603	0.152641	0.243568
1.93503	0.549758	0.33735	0.445878
1.24941	0.421887	0.244404	0.190933
0.360923	0.211687	1.99426	0.517561
0.438074	0.182664	1.11589	0.192715
-0.0200477	0.209813	0.0507972	0.318161
0.355801	0.243681	2.03513	0.0141746
0.444629	0.267912	0.141599	0.00658624
0.135523	0.483566	0.973827	0.0587468
0.324248	0.225784	0.277822	0.0104016
0.972747	0.220388	0.125585	0.278268
0.859194	0.249627	0.266739	0.578036
0.133487	0.260533	0.0907883	0.712811
0.283662	0.541718	0.257757	0.0551967
0.036896	0.75649	0.658213	0.155119
0.789696	0.479158	0.332658	1.01857
0.0902565	1.82544	0.33444	0.0367187
0.535824	0.61353	0.534939	0.149007
1.20266	1.25046	0.420354	0.468938
-0.291923	0.9527	0.728533	1.62825
-0.272761	1.47603	1.13858	0.259414
-0.248142	0.557798	0.319053	0.107581
-0.226833	0.550472	2.04078	0.291469
0.191806	0.963221	1.15103	0.146445
-0.151828	0.0412468	0.965598	0.160982
-0.285703	-0.081669	0.434	0.172679
-0.289172	0.295776	3.08163	0.143214
-0.204254	-0.0417977	0.425701	2.01116
-0.167191	0.131066	0.480244	0.0886304
-0.136352	0.451351	0.975512	0.766199
-0.0705432	0.0456507	2.41418	0.131587
-0.0212029	0.344349	0.94201	0.784857
-0.211523	0.378437	0.0585671	0.211904
-0.107937	0.114157	0.223001	0.0289218
0.106504	0.132168	0.177468	0.20263
0.0193296	0.204307	0.685158	0.335763
0.313236	1.16483	0.62318	0.074009
-0.0896524	1.35818	0.146375	0.135514
-0.0843098	0.410651	1.18382	1.03164
0.0496177	1.38296	1.24889	0.0241179
0.110908	0.276116	0.594564	0.4555
0.0819996	0.190374	0.286692	0.314278
-0.00837095	0.244289	0.900723	0.374111
0.0401448	0.110855	0.660706	0.0964003
0.0674615	1.11273	0.309208	0.114892
0.122034	0.881385	0.267797	0.158713
0.337961	0.195826	0.935605	0.0523988
0.347818	0.343961	2.26643	0.147517
0.307012	0.224241	0.348601	0.172149
1.3611	0.102374	1.69987	0.0640398
0.47233	0.483953	0.272587	0.550925
0.118234	0.533791	0.261948	0.179711
0.147861	0.230138	0.100758	0.06656
0.336806	0.520625	0.351205	0.187954
0.131287	0.470897	0.270526	0.159075
0.394023	0.141033	0.138925	0.119166
0.443478	0.801426	0.174586	0.834569
0.337084	0.518421	0.272323	0.0579263
2.14253	0.300625	0.279396	0.535413
0.424091	0.271765	0.639958	0.121255
0.14858	0.538522	0.37276	0.479492
0.221767	0.692554	0.320264	0.459733
0.299963	0.306571	0.242427	0.109558
0.312962	0.0752777	0.304279	0.764069
0.114602	0.531363	0.320334	2.18326
0.161081	0.277769	0.876745	0.778397
1.04208	0.27072	1.27806	0.407224
0.442649	0.321052	0.303639	0.655387
0.2683	0.628452	0.398409	2.7836
2.89869	0.46473	0.334203	2.41475
0.46253	0.0338106	1.42406	0.24141
0.1939	0.337684	3.52636	0.0858316
1.01526	0.372159	1.68395	0.590596
1.11097	0.233934	1.18852	0.0166679
0.534175	0.109149	2.97775	0.114279
3.05625	0.157114	0.00895364	0.0782288
1.0928	0.19423	1.5996	1.22446
0.659568	0.278981	1.16518	0.239364
0.139494	0.443915	0.394218	0.377801
0.740246	0.431581	2.12774	0.764959
0.829347	0.436482	1.68118	0.201224
0.264226	0.672617	0.81978	0.169811
-0.0132689	0.420291	0.120475	1.76119
0.288564	0.457241	0.0442801	0.648829
0.167962	0.867345	1.13633	0.0930164
0.813213	1.02952	3.55541	0.465763
2.07331	0.936896	1.09129	0.374293
0.690518	0.586821	0.588396	0.0841607
0.511654	0.452559	1.15634	0.158713
0.696081	0.738205	2.58738	0.130807
1.42894	0.402721	-0.00806298	0.180796
0.205797	0.344075	0.982432	0.875367
1.37927	0.24335	0.10332	0.606067
0.782978	0.218735	0.180629	0.411054
1.46182	0.232008	0.0457559	0.185977
0.0896524	0.421336	0.0661555	0.681203
2.36353	0.285425	0.210052	0.385934
0.603894	0.173799	0.13167	0.206334
2.68728	0.279973	1.85469	0.0557683
1.11598	0.407072	0.561117	0.103849
0.582911	0.118177	1.18502	0.332059
0.65263	0.736986	1.25583	0.291079
2.10398	0.212135	0.459412	0.620269
0.182117	0.407425	0.433499	0.848451
2.83283	0.311654	0.279368	0.605941
3.84545	0.262308	0.442327	0.363306
0.477782	3.09309	0.602515	1.53877
1.61194	0.231733	1.18563	0.334036
2.87876	0.502732	0.68733	0.3861
0.340439	0.159407	1.16333	0.325821
0.281462	0.0887737	0.65994	0.525931
1.71563	0.344052	0.355424	0.668588
1.69812	0.304723	0.215524	0.504292
2.46557	1.16812	0.602933	0.325055
0.739307	0.363021	0.0805117	1.34741
1.24898	0.83173	0.557163	0.585291
0.868116	0.13278	0.299099	0.978688
1.47361	0.877392	0.76475	1.97305
1.38797	0.830368	1.25806	0.0668943
12.4666	0.291026	0.450975	0.436187
5.89486	0.22477	0.588103	0.0657663
3.54394	0.362955	1.14967	0.281931
1.91901	0.117426	0.70234	0.63677
2.59609	0.758971	0.530177	0.233584
0.971425	0.48668	0.509304	0.144983
9.5882	0.710689	0.450403	1.04086
1.82858	0.217805	0.3872	0.884335
9.36611	5.02092	0.295813	1.97048
5.20209	2.33187	0.241033	0.648996
8.46539	0.138516	0.158113	0.531319
1.26269	0.120442	0.224018	0.139664
6.57089	0.214455	0.03605	2.20139
2.9368	0.189949	0.0864849	0.818778
0.447715	0.337684	0.0549046	0.218546
5.99756	0.362291	0.027765	0.127146
2.87275	0.14946	0.370546	1.69267
2.51409	0.0312036	0.132408	0.260696
3.02833	0.080184	0.110059	0.243972
0.450853	0.0868288	0.56425	0.300729
0.472056	0.508203	0.110672	0.765879
0.142739	1.70889	0.684002	0.121923
2.25576	0.169953	0.182856	0.000111452
0.393856	0.199168	0.0492782	0.349673
1.73623	0.22162	0.0632731	0.358055
0.908208	0.622645	0.329868	-0.0440015
0.324689	0.520373	0.335704	-0.0297846
1.34183	0.15387	0.264169	-0.0023674
1.07782	4.55039	0.203703	-0.0360096
0.51215	0.402018	0.174019	-0.0181158
0.566503	6.45957	0.157444	-0.0106389
0.697424	2.18645	0.205466	0.0854127
1.63122	0.311322	0.124291	0.615827
1.66525	3.76396	0.0726369	0.245337
3.74595	0.60142	0.0363488	-0.0462161
0.27133	0.522497	0.144229	0.0785478
0.167466	0.657729	0.104084	0.414896
0.0317024	0.583282	0.128809	0.0959122
0.170319	1.59534	0.161244	0.125738
1.29775	2.20678	0.214772	0.0945892
1.29341	0.109699	0.187239	0.0837563
1.46127	0.193665	0.187349	0.856624
0.555625	0.529427	0.201279	0.249138
2.01925	0.357317	0.199736	0.50677
0.752704	0.993857	0.189165	0.221721
0.172541	2.55163	0.187239	0.0796902
3.35895	0.286484	0.141311	0.113666
2.68494	0.343887	0.160583	0.018993
0.512747	0.545179	0.136078	0.140916
0.130292	0.462009	0.120712	1.07462
0.213163	0.478058	0.13729	0.846636
0.185474	0.232166	0.238395	9.24908
0.249874	0.0528931	0.185749	0.717169
1.01813	1.16689	0.183492	0.359879
1.29152	0.35725	0.210699	9.38505
1.94842	0.150289	0.224024	0.319513
1.44801	0.385438	2.44652	0.36098
0.322033	0.120808	0.832653	0.277108
1.01929	0.766366	0.421283	0.268516
0.865853	0.7599	0.700762	10.83
0.263237	2.88673	0.20756	0.933921
0.266223	1.30521	0.201169	0.230188
1.88717	2.12689	0.246823	0.214715
1.13635	0.292088	0.255966	0.214989
1.32959	0.62523	0.248476	4.52787
0.553966	1.17741	0.395289	0.41528
0.0632058	2.91604	0.414398	4.3099
0.217142	0.43475	0.285703	0.219727
0.400295	0.424206	0.549982	3.08163
1.7782	1.20516	0.340055	2.61327
0.0565404	0.272126	0.310869	4.6412
0.269902	0.133278	0.295616	4.27785
0.183549	0.418038	0.381138	1.32894
-0.0362788	0.333641	0.301673	0.449531
-0.0134315	0.629079	0.348593	1.18862
2.72152	0.817704	0.385653	0.910739
1.3525	0.860746	0.369959	0.599543
0.276735	0.248581	0.644977	5.14536
2.17882	0.934034	1.77616	1.00942
0.465956	0.443274	0.318852	9.26748
2.86113	0.604605	0.186467	0.328656
1.13018	0.664363	1.29832	0.30371
1.28707	2.90122	0.175729	0.570357
1.14229	1.78443	0.167689	0.312575
0.350287	0.765408	0.0443892	0.428993
1.68611	0.791241	0.0174601	0.382567
0.598967	1.90458	0.0318309	0.239885
0.327172	0.414621	0.0619556	0.6333
2.21444	0.257395	0.0685065	1.54002
4.35536	0.195855	0.0989048	0.617383
0.34392	0.330955	0.236967	0.902755
0.301506	0.395222	0.232449	6.76325
1.29075	0.994091	0.0818362	7.61325
0.868938	0.355262	0.127487	0.934088
3.22889	0.15732	0.127544	1.55516
0.0982238	0.384477	0.159097	0.65874
0.667776	0.231237	0.346442	13.1077
0.412233	1.26522	0.144613	0.34121
0.583282	0.766435	0.22309	1.66585
0.186933	1.82516	0.156289	6.16459
0.302037	1.07991	0.156453	1.31935
0.347965	0.349592	0.159208	2.0775
2.11505	2.60721	0.19952	0.674931
2.69863	0.481374	0.187512	2.94032
0.313608	0.399101	0.363572	0.905947
2.75965	0.124721	0.208385	19.982
0.301307	4.36372	0.384828	5.81379
0.624732	1.32925	0.161632	0.345724
0.292187	0.280414	0.149461	0.718876
1.46004	0.140539	0.165211	8.29539
5.74165	0.52727	0.138613	2.97287
3.3749	1.23657	0.116255	0.436205
0.54395	0.104459	0.0941703	0.200728
0.203777	0.0904967	0.0987947	1.02203
0.0736513	0.780892	0.107606	2.47102
0.367762	0.237438	0.123744	12.804
0.563814	0.245098	0.300682	6.30309
1.15748	0.106978	0.540399	0.4177
0.99747	0.0419488	0.160583	0.291592
1.75034	0.25173	0.484998	0.722067
0.970843	0.266786	0.341377	5.71929
0.453387	1.07968	0.287409	1.00083
3.1887	0.749155	0.312411	0.31169
0.546804	0.194095	0.285866	1.10601
0.665456	2.06581	0.461375	0.309212
0.677991	11.2141	0.268961	0.226168
1.42662	0.916557	0.339173	0.335153
0.572603	0.736854	0.325243	0.455918
0.684789	0.824268	0.310869	0.281679
0.908829	0.610904	0.666286	0.528722
0.10675	0.322232	0.422055	0.253321
0.225567	2.52318	0.232616	0.238395
0.228882	0.613492	0.225951	0.425083
0.105555	1.2102	0.267749	0.49392
0.160803	0.999228	0.253982	0.367315
0.151517	2.44763	0.689693	0.463575
0.563153	0.311354	0.292257	0.317203
0.294246	0.393994	0.266483	1.441
0.247387	0.625796	0.314726	0.207723
0.121904	0.448445	0.657972	0.339451
0.262045	1.08542	0.37833	0.261692
0.105555	0.208156	0.403329	0.851321
4.08715	0.877326	0.179195	1.17111
0.923819	0.157883	0.587425	0.492541
0.200694	0.304989	0.787215	0.253541
0.22467	0.277332	0.365107	0.0322185
0.29199	0.747166	0.323093	0.322321
0.257136	0.487511	0.298751	0.323974
0.339874	0.50313	0.190157	0.307069
6.66438	0.242579	-0.0488464	0.188006
0.936951	0.590212	-0.171595	0.409386
0.990277	0.150687	5.81721	1.68127
2.38234	0.102038	0.205573	0.305196
1.48027	0.283864	0.0712043	0.243571
1.08718	0.207957	0.413684	0.436095
0.362126	0.559405	0.0223048	0.345561
0.126345	0.323491	0.132168	0.052042
0.191643	0.449108	-0.0576011	0.0687801
0.23117	0.573962	0.263067	0.235367
0.398073	2.49074	8.4074	-0.00435077
1.26273	1.67088	2.0352	0.299633
1.76248	0.753566	-0.0417407	0.215099
0.0906317	0.240586	0.0268189	0.390387
0.693777	0.0847283	0.252276	0.446556
0.778935	2.49117	0.300682	0.438956
0.317093	0.297827	0.445404	0.400244
0.899313	0.239097	-0.0796285	0.463408
2.6344	0.25939	-0.0306187	0.652573
2.01189	0.576683	0.0419649	0.501295
0.533505	0.455808	-0.0889912	0.47255
0.162624	0.121803	6.3065	0.0430099
0.409713	0.542262	5.97454	0.162126
0.516261	0.324688	1.72852	0.219123
0.616011	0.575655	0.691065	2.61712
0.396746	0.24208	0.557027	2.98587
0.165873	0.0805821	0.448319	0.129744
0.915097	0.0902656	0.551742	0.41974
0.883296	0.106814	0.961952	1.63391
0.277828	0.127906	0.523049	0.280413
0.52548	0.202486	0.175395	0.27221
0.313677	0.51603	0.801095	0.399476
4.48721	1.16955	0.901653	2.21368
2.81417	0.565871	0.75489	0.12154
3.89348	0.359374	0.611215	1.44948
1.47192	0.349889	0.088673	0.276063
1.69509	0.228152	0.247387	0.128201
3.99539	0.363817	0.925874	3.52924
1.14826	0.268543	0.121371	0.296882
0.909493	0.321866	0.232861	0.314942
0.265195	0.0810466	2.07082	0.0989618
2.12892	0.0429442	0.652224	2.41177
0.717251	0.0557098	0.281775	0.622285
0.665589	0.117392	1.81763	2.13791
0.285423	0.133111	0.789946	0.421226
0.617572	0.379667	1.40851	0.194394
1.64287	0.15891	0.0798865	1.7506
2.44256	0.432693	0.994187	1.86383
0.899414	0.267813	0.345345	0.0610171
2.81268	1.24622	0.273385	0.201993
1.92136	0.33984	0.137919	0.343357
3.33129	0.712446	0.201987	0.145083
0.712515	0.270632	0.458627	2.08508
0.85438	0.116861	0.322134	0.627619
3.6788	0.471061	0.393165	0.694804
0.818234	0.461908	0.577644	0.201623
1.57678	0.113081	0.220194	0.108438
4.41903	0.0857556	0.395289	0.102768
0.942722	0.0546504	0.396879	0.0711984
0.709165	0.274014	0.220791	0.0709673
1.40523	2.90726	0.115236	1.87921
1.44091	1.64074	0.15732	0.0828382
3.39202	1.18871	0.107511	0.154268
2.45268	0.930086	0.0652286	0.124654
1.23458	0.386367	0.0802183	0.124522
2.41328	0.145978	0.103697	1.60479
1.58284	0.0606522	0.733703	2.30892
4.23774	0.0390314	0.373267	0.45322
1.14063	0.174065	0.408121	0.790143
1.52507	0.469803	0.714766	0.239692
7.51524	0.0608193	0.218336	0.227887
1.0245	0.191773	0.800723	0.0556435
1.1272	0.0630411	0.15241	0.150122
1.14182	0.0778295	0.18335	0.535461
1.95071	0.515168	0.0867167	0.314173
0.256606	0.115303	0.286848	12.2006
1.28153	-0.00882086	0.0593594	1.38778
0.55065	0.176719	0.0943431	1.82821
3.42783	0.10542	0.207758	0.244236
0.200827	2.31379	1.11745	0.545941
0.793293	0.388026	0.249043	7.09814
0.754926	0.661743	0.900638	0.945042
0.681407	0.418468	0.356985	3.68924
1.28269		0.878818	1.72351
0.458726		0.442908	4.04305
0.507074		0.214389	3.4211
-0.00570438		0.116595	5.10538
0.247652		4.42241	4.50774
0.463599		0.32903	2.88195
0.407125		0.585668	6.48816
0.13991		3.46009	7.86218
0.547168		2.02658	5.46107
0.475804		2.06551	1.05239
0.574227		0.239593	1.89984
3.13889		1.914	5.30843
0.560498		3.09658	0.990972
0.136228		1.34819	0.146243
0.201955		1.52345	5.30869
0.363584		1.50329	12.6968
0.366703		0.253455	1.08737
0.43518		0.284228	3.78306
1.1267		2.4728	0.737316
1.16102		0.425531	0.63561
0.809244		0.741032	0.654743
0.709826		1.56895	2.19245
0.295372		2.63483	-0.0159187
1.69549		0.309	0.071926
0.320608		0.367531	0.129993
0.367364		0.297095	0.0439716
1.02178		1.29168	1.75558
0.603211		0.100645	4.29468
2.42369		0.294806	1.35857
0.353271		0.356653	0.776414
0.718249		0.34624	0.309332
0.427188		0.778272	0.0984572
1.37406		0.314803	0.249343
0.566965		0.493114	3.21433
1.32156		4.51653	1.26058
0.0534217		4.27176	2.24501
0.264033		7.1445	0.777841
0.410143		1.38908	0.359738
0.272389		0.15994	1.23202
0.082042		0.446557	1.04877
0.113545		1.27245	1.81696
0.110694		1.59608	0.0957709
0.228882		1.02715	1.6816
0.110859		5.10959	3.40853
0.277297		2.44309	3.2266
0.515168		0.417541	0.768291
0.513243		0.135301	2.34374
0.65491		1.20397	1.15194
2.03271		0.16561	1.12226
0.573367		0.262278	1.48468
0.418667		0.457003	2.28279
0.740966		0.104329	3.24338
1.6306		0.2965	0.396414
1.30044		0.120776	0.448347
0.855772		0.102901	0.273186
1.06821		0.129764	0.0961691
3.33431		0.194825	2.84007
3.73713		0.0618146	4.22407
2.36881		0.15659	2.49326
0.493645		0.0330296	1.72902
1.67271		0.243774	2.37003
0.179902		0.538248	0.471956
0.351017		0.134537	2.32367
0.23253		0.0649311	5.78871
0.0973635		0.227356	1.7977
0.0813464		1.1973	0.787822
0.00431089		1.00029	1.14007
2.4664		0.47985	0.886577
0.486119		0.114307	0.641248
0.670797		0.41817	2.79119
0.905416		0.398238	2.01076
1.25438		0.413427	4.8824
0.833089		1.25935	8.68953
0.670563		0.452161	3.31687
1.96255		0.0898354	0.226828
1.20875		1.79703	0.0765046
0.834583		1.64101	0.783811
0.108937		0.508468	0.339677
0.473683		0.669236	0.496334
0.796279		0.25896	0.859952
1.17482		0.655972	0.24543
0.677362		0.0887737	0.437073
0.626956		0.0543529	0.560203
0.878852		3.07797	0.410942
1.59446		3.00309	4.06102
0.46473		0.301209	2.12394
0.370185		2.89416	0.0605539
2.35382		5.04745	1.16753
0.0627757		0.461744	0.271927
-0.00809093		0.418136	0.274911
0.38617		0.229843	0.218471
0.98149		0.471063	0.997969
4.98819		0.568557	3.9616
0.231006		0.104029	0.959668
0.822213		0.834483	-0.0118389
1.46598		2.91949	1.07948
2.27234		2.81079	0.170717
2.21043		2.9249	-0.0309062
1.18779		4.1674	-0.00298376
0.439162		0.329959	0.0595265
0.520044		1.22165	0.0746466
1.12777		2.27221	0.320873
2.81135		3.16482	0.110827
0.740105		1.22745	0.0613822
0.434487		0.405835	1.79498
0.367698		5.37913	2.0875
0.271662		2.11559	0.197942
0.382322		0.554133	0.185872
0.132979		1.67351	2.80552
0.383582		0.772039	1.35439
0.966068		1.62068	0.888039
3.06368		1.27096	0.161498
0.762323		1.71735	3.67077
1.77943		8.362	0.867279
0.874244		0.927036	6.2358
0.874509		6.53425	0.185673
1.60602		2.55733	0.742226
0.717754		2.3834	1.36242
0.207561		0.464796	0.406398
0.706213		0.163986	0.195853
0.548197		0.139047	0.551579
1.30137		0.205271	1.93326
7.11837		0.104857	0.24689
8.37675		0.187329	2.44044
1.95591		0.328831	0.179604
2.15919		0.0347869	6.07652
0.735396		0.0620114	0.653718
0.849671		0.0806828	1.19578
1.3217		0.14989	0.104658
0.994853		0.931777	0.0471887
0.395788		0.448312	0.702929
0.348299		0.0591283	1.44197
0.396714		0.427124	0.190283
0.681043		3.26646	0.100382
2.69741		0.244732	1.21379
2.61155		0.270831	0.602317
1.03428		0.21668	0.198109
0.552309		0.1544	4.97854
2.70842		1.29327	0.546472
0.674643			2.16616
0.836274			0.568491
3.31744			0.486881
0.65972			0.569553
0.599997			0.550849
0.638927			6.37392
0.823639			0.321056
1.05663			1.20553
0.26871			0.979961
0.215188			0.492716
0.442477			0.0363131
0.0995189			0.0550829
0.282704			6.80456
0.19801			2.16808
0.0863208			0.386534
0.94763			8.01851
0.137422			1.79743
0.246492			0.681672
0.0963681			4.89059
3.73802			1.6243
0.307574			0.143525
0.238566			0.542063
0.217375			0.0812114
0.211108			0.0697385
0.857662			0.108173
0.502368			0.270799
0.322697			0.568921
0.42049			0.835112
0.071894			0.747464
0.275375			0.558144
1.14733			1.53277
0.232065			0.17695
0.914202			0.313013
0.479784			0.946932
1.61335			1.0626
0.491291			2.28212
0.356321			1.13463
1.17336			0.53901
1.76129			1.78204
1.51158			1.19319
0.473084			4.36478
0.232198			1.36477
0.0475525			2.24803
0.282471			1.11626
0.362358			3.53352
0.819095			3.07137
0.268312			0.624965
0.38723			0.613657
1.77488			0.986197
1.21594			0.511685
0.773164			6.34752
0.170319			3.54777
0.16216			0.365641
0.140008			0.314572
0.104592			2.0936
0.339476			0.867876
0.241053			0.430174
0.119614			1.51595
0.161496			0.42069
0.174397			2.2863
0.095041			0.402748
0.166704			0.310725
0.457632			0.51185
0.149758			0.440123
0.0418161			0.16982
0.108937			1.03617
0.251663			0.59837
1.83033			0.837798
0.558078			2.90003
0.357351			0.267317
0.0631395			2.15601
0.128203			0.983542
0.188558			0.554629
0.682071			4.81515
0.399467			0.700376
0.214691			2.106
-0.00845475			2.49141
0.211506			0.325051
1.07354			1.58705
0.621055			1.97369
0.198905			1.39103
0.245497			1.07112
0.236875			0.830302
0.300115			1.48379
0.283036			1.05793
0.239229			0.563684
0.499151			2.34729
			0.615547
			1.52471
			0.0672513
			0.373169
			0.988517
			0.331518
			3.64355
			0.679748
			0.402419
			0.721399
			0.527471
			0.232896
			0.234122
			0.578108
			0.531251
			0.228585
			0.316297
			0.269902
			1.9715
			2.19657
			0.571809
			2.06309
			1.20918
			1.0814
			4.56683
			0.507905
			0.0703701
			0.209351
			0.0614165
			2.63152
			1.03269
			0.443672
			1.62622
			0.0936498
			0.015818
			0.44566
			0.119449
			0.278956
			0.302037
			0.257898
			0.198605
			0.449971
			0.108109
			0.369819
			0.223311
			0.311654
			0.123794
			0.174465
			0.122334
			0.279288
			2.67436
			0.22477
			0.0477539
			0.293317
			3.37305
			2.02154
			3.09439
			4.04736
			0.392435
			0.371014
			2.32958
			0.707673
			0.209948
			0.311853
			0.845857
			0.193267
			0.694905
			0.929292
			1.17462
			0.329959
			0.232166
			1.89672
			1.62609
			0.503828
			1.81819
			1.45756
			1.2557
			0.548826
			3.68845
			0.0110427
			2.47536
			0.331419
			1.56116
			2.74062
			2.10554
			0.61157
			1.28774
			1.24071
			0.477429
			1.0754
			2.61208
			2.69051
			3.63817
			1.85968
			0.464929
			2.2426
			0.699181
			2.46892
			0.0637367
			2.08853
			0.354898
			0.369389
			0.355228
			0.103729
			0.283832
			1.65849
			0.580993
			0.26798
			0.421916
			0.141234
			0.188556
			0.678554
			0.302632
			0.567859
			0.77824
			0.320276
			0.059126
			0.500642
			0.431135

## Sheet: Fig. 7 F
norm synaptophysin intensity
Pclowt/wt	Pclogt/gt	Pclowt/wt + Rab5Q79L	Pclogt/gt + Rab5Q79L
1.12737	0.534722	0.582505	0.828384
0.865793	0.368922	1.16384	1.10418
0.937644	0.617328	0.733142	0.606279
1.39229	1.27139	1.29663	0.574836
1.19396	0.765554	1.66182	0.513034
0.636342	0.957569	3.06178	0.973409
1.13418	0.646332	2.07486	1.53082
1.33604	0.699934	1.09069	1.17409
1.66033	0.966766	3.18115	1.77967
2.14456	0.786918	3.40408	0.84487
1.9447	0.484969	1.65665	0.779748
1.40939	0.422052	2.97001	1.35226
1.16416	0.449618	0.997654	1.9457
1.44113	0.951279	1.70341	2.12505
0.796852	1.14514	1.35268	0.971762
0.581035	0.599695	1.66024	1.26249
0.475919	0.814572	1.597	2.83262
0.697643	0.813485	1.56358	1.19311
0.579654	0.72938	1.63884	0.637106
0.595494	0.433867	1.08593	0.609834
0.451204	0.819187	1.14641	0.704227
0.461078	0.991451	1.20124	0.542012
0.459345	1.04626	1.74449	0.509244
0.450557	0.49737	0.797059	0.642044
0.728527	0.623322	0.36234	1.36508
0.767142	0.75853	0.483296	1.03063
1.10559	0.70355	0.417088	0.705079
0.540217	1.67801	1.05578	0.341122
0.442095	0.648948	0.469866	1.37798
1.06424	0.565079	0.795972	1.93844
0.622529	0.419791	1.31341	0.945962
0.97141	0.652799	0.859623	0.69873
0.762028	0.370011	1.36093	0.992422
0.609363	0.549445	1.58001	1.12819
1.09078	0.466898	1.33299	1.3619
1.11388	0.402805	2.33017	0.77346
1.8449	0.284582	-0.0111969	1.91243
0.744927	0.514182	-0.00511383	1.06407
1.53146	0.819688	-0.00678871	3.54966
1.95096	0.7342	-0.0199525	2.89348
1.00712	0.667874	-0.0196889	1.40777
1.12566	1.08625	0.00229332	2.26652
1.88176	0.748601	0.118135	1.33619
1.34694	0.472951	0.78648	1.38494
0.597256	0.597287	0.784834	0.745221
1.4309	0.515532	1.33866	0.901762
1.61525	0.473393	1.11785	0.978669
2.60302	0.956747	0.73476	1.30389
0.986749	0.387319	1.25205	2.27363
1.21832	0.57369	0.986252	1.66961
1.36478	0.562611	0.777751	2.25844
0.988219	0.41359	1.60614	1.48976
0.891036	0.587677	1.29355	1.59329
1.05493	0.604369	1.35206	1.40795
0.344677	0.717245	1.63206	1.95193
0.351026	0.535487	1.92516	1.53628
0.413501	0.657383	1.35761	0.9747
0.49549	0.731203	1.82154	0.531843
0.969852	0.639047	2.99998	2.70697
0.969088	0.448472	0.193513	2.6012
1.21027	0.440126	0.247585	1.45747
0.343296	0.362575	0.341534	0.879253
0.719654	0.377974	0.558379	0.673193
0.556086	0.321403	0.371743	2.68111
0.408888	0.265893	0.401306	1.78205
1.27953	0.393725	0.39496	1.85587
	0.540394	0.949312	1.82327
0.470665	0.463431	1.1155	1.12363
0.805001	0.429195	0.838142	2.12904
1.00574		1.33798	3.17789
1.26181	0.79755	0.40407	0.581623
1.13144	0.711053	0.583476	1.98887
0.530065	0.755311	1.09578	2.60373
0.839911	0.878091	1.9648	2.55486
0.830461	0.771869	1.17909	0.700522
1.18489	0.773463	1.2284	0.97714
0.799469	0.769526	0.898914	1.10756
1.56556	0.627283	0.730116	2.53464
1.5568	0.900199	0.893447	0.880723
1.27213	1.03087	0.907671	2.25791
1.32328	1.24219	0.316818	0.827356
0.653066	0.815561	0.407801	1.13974
1.03061	0.921945	0.368188	1.70523
0.613675	0.638711	0.443417	2.53446
1.15706	1.03408	0.965474	2.06151
0.870237	1.11834	2.72272	4.58722
1.46915	0.887076	2.97074	2.99813
1.07549	0.717838	0.722152	1.99204
1.96907	0.74237	0.702726	2.39426
1.46204	1.19121	0.591175	1.84811
1.18572	0.708308	1.06389	1.35649
0.831814	0.872559	0.989044	1.98978
0.899635	1.21431	1.85922	1.17121
0.692479	0.800175	2.19173	1.60484
0.9552	0.880494	0.826152	0.688944
1.02461	0.937129	2.91264	0.537425
1.06346	0.657044	0.915723	1.35265
0.924429	1.12803	1.1795	1.46861
1.74229	0.420269	2.12749	0.850249
0.965033	0.483909	0.578362	1.25773
1.21404	0.503373	0.673929	0.720035
0.561118	0.591242	0.4726	1.1313
0.61315	0.802659	1.11861	2.14665
0.84419	1.74263	3.3692	0.971381
0.662091	1.55858	1.24189	0.713483
0.827796	1.21358	1.50843	1.28379
1.58339	0.987444	0.726414	1.1631
0.798943	0.756745	0.52623	1.02575
0.828221	1.16124	1.18185	0.694735
1.37704	1.1074	2.78408	1.29149
0.774332	0.729326		0.629584
0.732395	0.729145	0.772797	2.69762
1.81369	0.955925	0.766174	2.28856
0.928002	0.852368	1.24944	1.64792
1.16896	0.756261	0.715294	2.15041
1.16867	0.930991	0.878575	1.10359
0.976359	0.814087	0.762398	1.44704
0.919986	0.937229	0.733829	1.02607
0.595583	0.667301	1.1816	1.34262
1.07402	0.974987	0.853217	1.55418
1.24762	0.666271	0.934584	1.22164
0.888631	0.952675	0.911627	2.04979
1.57319	0.978964	1.84189	1.14606
1.16131	0.90963	0.63118	1.37707
1.96885	0.938199	0.755554	2.4833
2.04927	0.635319	0.923721	0.561936
0.804416	0.645252	1.48575	1.97042
1.48157	0.496629	0.530611	1.89369
1.8704	0.757089	0.986353	0.972235
1.32836	0.969535	1.1566	1.26255
0.900463	0.655449	2.22491	1.51016
1.56633	0.595543	0.749255	1.26931
1.71843	0.535658	1.06328	0.737816
0.56659	0.656518	0.697083	2.02452
1.10382	0.696941	0.549872	1.09675
0.95413	0.511873	0.925378	2.93298
1.15741	0.56122	1.0973	1.11761
0.879021	0.654319	0.588234	0.677747
0.881342	0.644769	0.969091	2.35553
1.56532	0.642265	0.452109	0.550739
1.26652	0.571234	3.40624	1.75654
0.924995	0.887218	0.519808	0.43951
3.56625	0.430868	0.460913	0.425815
1.26028	0.664918	0.500689	0.646833
1.16668	0.612907	0.874599	0.996741
1.39818	0.559221	0.515186	0.568282
1.38867	0.597865	0.725208	0.515005
1.89847	0.683858	0.535598	0.570103
1.34427	0.464284	0.568447	0.523673
1.18394	0.635804	0.864583	0.449324
0.935634	0.986677	0.517728	0.63793
1.6052	0.714952	1.03469	1.03847
0.890085	0.691772	0.834257	0.539161
1.11652	0.697183	1.21295	0.659733
1.53311	0.63651	0.845342	0.931121
0.557464	0.674186	1.13411	0.517736
0.57194	0.685715	1.14699	0.290811
0.640609	0.573233	0.730719	0.20168
0.849824	0.565823	0.719393	0.244939
0.926912	0.622578	1.15539	0.409711
0.656034	0.696658	1.65929	0.312116
0.759693	0.592091	0.750991	1.02586
0.973107	0.688137	1.00957	1.44701
0.76468	0.356466	1.23183	1.09072
0.651956	0.490916	1.06732	0.995918
0.571799	0.492228	0.688803	1.27962
1.30139	0.683979	0.822869	1.42817
0.844515	0.505211	0.839366	1.41168
0.88102	0.836701	0.865957	1.50437
0.581734	0.838517	0.792887	2.34512
0.69153	0.612322	1.11206	1.89698
0.564531	0.637682	1.24556	1.01293
0.522494	0.778854	0.821497	2.24927
1.54523	0.506806	0.575009	1.10142
1.51014	0.493419	1.00711	1.36299
0.88839	0.384834	0.725349	2.23093
0.449242	0.688803	1.07713	0.864824
1.0721	0.583732	0.807889	0.604927
0.905167	0.517264	0.388569	0.511566
1.44468	0.638126	1.18719	0.9067
1.41658	0.831632	0.71596	0.893007
1.08202	0.848552	1.05026	1.16554
1.90915	0.873206	0.542886	0.706958
0.958531	0.544461	0.56245	1.09031
1.34072	0.593726	0.990512	2.15961
0.788223	0.471654	0.542503	1.19375
0.604569	0.535214	0.370317	1.87406
1.3	0.705663	0.51155	1.53916
0.667907	0.714123	1.07867	1.2803
0.516477	0.363675	0.880414	0.967942
0.588578	0.347946	1.28358	1.005
0.815884	0.576362	1.53853	1.00664
0.794442	0.318952	0.580824	0.266098
0.793513	0.307202	0.667483	0.372448
1.05882	0.731629	1.11372	0.865499
1.0317	0.531217	0.928487	1.593
1.7707	0.351783	2.10116	1.68313
1.00788	0.860506	1.75709	1.64287
1.29256	0.589385	1.02835	1.60549
0.914394	0.918433	2.3893	1.41633
0.839608	0.530368	1.8995	1.91602
1.00216	0.592495	1.12258	0.882986
0.881484	0.468121	1.21818	0.868762
1.17865	0.387984	1.19599	2.11967
0.581592	0.701484	1.15668	1.12892
1.01272	0.967415	1.22337	1.79747
0.949748	0.781621	1.13839	1.06704
0.611554	1.01656	0.88229	1.46611
0.772333	0.630918	0.750021	0.715892
0.588013	0.507876	1.53841	0.973232
0.620177	0.543432	1.36133	0.576628
1.04028	0.743198	3.60556	1.26081
0.943368	1.01401	1.9344	1.26084
0.598533	0.987706	1.04196	0.61054
0.855862	0.732597	1.8763	1.26211
0.756523	0.626132	0.902562	1.55315
0.917282	0.912718	1.32768	1.3604
0.760239	0.764963	1.33995
0.669643	0.886975	1.16831	1.43172
0.737202	0.704189	0.72545	1.36006
1.09922	0.786124	2.5945	1.30036
0.651896	0.690439	1.47256	1.37757
0.741562	0.823112	1.69137	1.37074
0.745095	0.484656	0.851924	0.813198
1.05133	0.813259	1.44143	1.01763
0.950314	0.803689	1.71635	2.04765
0.911406	0.730276	2.03915	1.16042
0.892427	0.750587	1.48076	0.809321
0.947528	0.450535	2.21697	0.837205
1.12502	0.476763	1.13377	0.780975
0.660416	0.360282	1.11026	0.781519
0.556415	0.400179	2.04473	0.652843
0.569276	0.381846	1.24334	0.886631
0.63431	0.896283	1.12268	0.785839
0.87153	1.26274	0.645031	2.31554
0.791797	1.02976	1.03118	1.94103
0.836862	1.60667	1.32489	1.55401
0.961176	1.24209	1.26131	0.802497
0.518921	0.775341	2.57645	1.21408
0.930729	1.68602	0.931031	1.27306
0.557787	0.824929	0.702373	2.78607
0.949748	0.80492	1.00556	1.29503
0.583691	0.836943	1.42982	0.594735
0.68727	1.07608	1.74419	0.986798
0.552799	0.569558	0.84195	1.40977
0.515992	1.0463	1.17596	1.63984
0.784852	1.09433	1.97537	0.884269
0.900443	0.85887	1.1517	0.842999
1.05948	0.715839	1.91858	1.67901
0.867531	0.778633	1.9953	1.06869
1.37716	0.863696	2.38028	1.22537
0.772535	0.935594	0.651007	1.76941
0.704896	1.12331	1.14814	1.15179
0.719373	0.609617	1.28784	0.873327
0.777563	0.782448	2.15164	0.667563
0.876275	0.945265	0.977207	0.974704
	1.24205	1.15487	0.640811
0.385411	0.893012	1.03691	0.779703
0.265233	0.807585	1.77324	1.26511
0.271008	1.04214	0.815742	1.00846
0.251823	0.952656	1.2796	0.821982
0.340584	1.15238	0.934079	1.14
0.54409	1.79376	0.949829	1.66038
0.675709	0.985647	0.746004	1.03826
0.912809	0.731931	0.813098	0.690439
0.690407	1.15717	2.56247	0.800054
0.576844	0.911345	1.03336	0.940985
0.736493	0.792301	1.36571	0.859234
0.501205	0.902341	0.767143	0.979287
0.7361	0.723007	1.57921	1.56994
0.74211	1.49116	0.491683	1.31897
0.642535	0.607153	0.678628	0.868722
0.745417	0.717575	0.785639	1.91539
0.767016	0.693489	0.794159	1.5988
0.636419	0.684524	1.5692	0.498507
0.517136	0.689046	1.04254	1.0103
0.734709	0.928285	3.75726	0.508482
0.652928	0.761713		1.57103
1.2693	1.35974	0.75106	0.567318
0.745652	0.861495	0.437323	0.875386
1.42018	0.739665	0.55115	0.828644
1.17802	0.726419	0.610463	1.49413
1.27426	0.761692	0.595398	1.12343
1.51587	0.840678	0.71786	1.32323
1.62655	0.675256	0.551596	0.786103
0.966664	0.593969	0.477636	0.594352
0.983513	0.945205	0.419976	0.630978
0.923097	0.806152	0.729722	0.685068
0.473436	0.598552	0.766177	1.01127
1.20481	0.620519	0.606974	0.933333
0.899423	0.509954	0.780822	0.862626
2.07757	0.792503	0.609361	0.960026
0.420422	0.502606	0.891131	1.17267
0.709619	0.960449	0.483751	0.845847
0.999391	1.30052	0.417613	0.833853
1.79027	0.977852	0.671089	1.98922
0.685552	0.958631	0.605583	1.12094
0.589808	0.946052	0.422075	1.74189
1.55918	1.02102	0.448583	2.35966
0.493987	0.774634	0.27875	1.21784
1.6035	0.81752	0.338485	0.656197
1.57626	0.885238	0.686759	0.483586
1.28203	0.747841	0.503961	1.1033
1.64668	0.822648	0.497924	1.08208
0.773579	0.759571	0.592984	1.57897
0.821974	0.817963	0.708936	0.631079
1.48409	0.629323	1.09073	0.58672
1.282	0.597562	0.622852	0.824788
0.29489	0.545814	0.931207	1.01458
0.634898	0.550013	0.741585	0.863292
0.656602	0.769404	0.624583	1.54634
0.734289	0.797631	0.764602	1.38637
1.93068	0.596815	0.872076	1.15216
1.23891	0.695426	0.633375	0.525704
0.84318	0.847078	0.927139	1.02201
1.2588	0.69688	0.972412	0.849077
0.465197	0.820487	1.39871	0.545108
0.675526	0.662597	0.816358	0.982214
0.938713	0.701039	0.950341	2.24712
1.15109	0.469816	0.989813	0.595827
0.80439	1.03737	0.59015	0.542241
0.69744	0.547974	0.988973	0.57291
1.00367	0.551002	0.857406	0.540282
0.944356	0.899372	1.13251	0.787517
1.66075	0.745438	0.371291	0.698678
0.850608	0.871045	0.621383	0.720746
0.91323	0.832602	0.983935	0.356264
0.660041	0.706874	0.692297	2.28754
0.833181	1.05314	1.01472	2.27797
0.348037	1.11337	0.653245	2.00027
0.581279	0.893395	2.20429	2.55688
1.09243	0.643274	0.996297	3.05636
1.51254	0.819538	0.673532	3.55083
1.60951	0.621327	0.842001	3.00263
1.28245	0.63869	0.96782	2.01902
1.26492	0.710347	1.08099	2.09456
0.785178	0.452048	0.671039	2.67046
1.1345	0.863534	0.600675	2.57316
0.968553	0.612645	0.940604	1.45799
1.58889	0.700029	0.364758	1.69186
1.54348	0.615289	0.407117	2.56007
1.20773	0.533215	1.57493	3.34192
1.62017	1.2727	1.45225	2.07233
0.894123	0.889115	0.85633	1.78744
0.678255	1.18523	0.646684	3.85516
0.664083	0.813542	0.690513	1.94626
0.997686	0.792079	1.47425	1.38821
0.816173	1.10461	1.44184	0.893618
1.23203	1.92639	1.36911	1.13582
1.89525	1.00584	0.931391	0.703482
1.52102	1.42243	0.902916	1.29638
0.489264	1.34758	1.68718	2.50277
0.724341	1.21584	1.48488	1.4299
0.712033	1.1081	0.318487	1.34207
0.991938	1.34849	0.661564	1.91948
1.43842	1.87906	1.31938	1.9673
0.492386	1.46015	0.67739	3.6033
0.992856	0.750487	0.818957	2.52448
1.12007	0.840638	1.45081	0.937048
0.581331	1.26941	0.756257	0.572284
0.613298	1.91197	0.598104	0.783276
0.769116	1.86287	0.781137	1.01038
0.954591	1.20262	1.62429	0.907428
0.980154	1.68832	1.14175	1.47323
1.07642	1.25846	1.44228	1.43866
0.616894	1.59821	0.900318	2.44258
0.70555	1.58799	0.81594	1.5951
1.23371	1.17441	1.0654	1.40585
0.977583	1.56171	0.924385	1.37686
0.602327	1.78669	0.477558	0.895254
1.41451	1.6501	0.550573	1.06817
1.017	2.21713	0.823812	0.898989
1.59791	1.00816	0.884465	0.956068
1.45359	1.22803	0.792003	0.595826
1.0997	0.808999	1.2239	0.957682
0.80557	1.86759	0.624848	0.861333
0.816726	1.18134	1.32373	0.77855
0.900238	0.73284	0.875358	1.22753
1.39155		0.919135	1.35863
1.18768	0.342317	0.852341	1.37454
0.965826	0.508396	0.630911	1.80097
1.06813	0.523987	0.846515	1.87266
1.05102	0.546793	1.24169	1.17275
0.984408	1.11844	1.11099	1.65868
0.231065	1.02231	1.08354	0.899331
1.62757	0.957217	0.73177	1.62143
1.48774	0.468216	0.727387	0.721189
1.09427	0.585951	2.00776	0.800075
0.871053	0.485327	2.24633	0.520191
0.788723	1.56847	1.28972	0.677154
1.21728	1.52036	0.70765	0.904662
1.34961	0.576554	0.810375	1.11386
0.740904	1.12865	1.14681	1.05318
0.798013	0.679201	0.907036
1.24812	1.13923	0.922257	0.551596
1.7689	1.00784	0.982832	0.652062
1.06456	0.770112	1.19345	0.802211
0.974696	1.12655	0.544012	0.683713
0.800297	1.97582	0.727098	1.02816
0.647182	0.866854	0.724814	1.46858
1.91887	0.783472	0.727465	0.734867
1.32746	0.504879	0.927114	1.10052
0.734684	1.24938	1.16206	0.613272
1.16532	0.774681	0.756677	0.717072
0.761427	0.812973	0.925093	0.818116
1.34153	1.25187	1.04028	0.461838
0.703976	0.989631	0.820558	0.685552
0.981677	1.11243	0.599547	0.537476
1.03614	0.738043	0.61385	0.619703
0.316229	0.773028	1.54878	1.02307
0.536294	1.03984	0.533409	0.638102
0.969131	0.585663	0.478686	0.709619
0.444331	1.43525	0.749091	1.36756
0.693896	0.694503	0.752713	1.10666
0.910316	0.881211	0.740719	1.13532
1.12222	0.503069	0.821056	0.685001
0.963829	1.1096	0.949238	0.919188
0.586161	0.945091	1.1707	0.578446
0.781373	0.833129	1.17873	0.843837
0.903413	1.09246	1.12532	1.10327
0.777436	0.607184	1.59723	1.35016
0.587892	1.565	0.812606	1.00204
0.546871	1.55684	0.959868	1.07456
0.375621	1.17379	1.71232	0.755364
0.488029	1.27426	1.74827	0.952887
0.681377	1.31352	1.53923	0.850557
0.336962	1.53566	3.76367	1.3578
0.436537	0.932914	3.37104	0.815177
0.597789	1.26925	2.48642	1.33176
0.604245	1.34801	0.924226	0.719068
0.492913	0.81048	0.938898	0.775679
0.64398	0.793894	1.80756	0.825912
0.744473	1.66056	0.701509	0.718673
0.787593	0.965931	1.17193	1.99398
1.59708	0.800637	0.773814	1.50118
0.848536	0.721457	0.945091	2.0423
0.987084	0.754944	1.28757	0.80531
0.907456	1.08091	0.722846	0.828721
1.57613	1.11319	1.04317	1.28442
1.98556	0.726784	0.875593	0.890003
0.88995	0.837749	0.864045	0.631199
1.56477	0.936194	0.462203	0.726967
1.51333	0.7519	0.73148	0.581936
1.99558	0.929528	0.771768	0.641041
1.26681	0.614665	0.709749	1.46575
1.1222	1.84165	0.655842	1.94112
1.29596	2.26216	0.778039	0.999498
1.55718	0.732951	1.57009	0.636711
1.01737	0.773081	0.571436
1.19353	0.356121	0.691692
0.627761	0.552279	0.675579
1.01265	0.826856	1.06291
1.27565	1.39147	1.41724
1.01438	1.03805	1.66035
1.43533	1.10844	1.05661
1.40417	1.14597	1.12267
0.987715	0.606974	1.11524
0.934253	0.387879	1.07359
1.2961	0.709146	0.838509
0.919005	0.865148	0.765205
1.13584	1.15909	0.624295
1.28725	1.21408	0.793577
1.00926	1.19374	0.963463
0.577842	0.947742	1.01527
1.07976	1.40648	0.678543
1.40879	0.906431	1.3047
1.22432	0.779274	1.19935
0.751139	1.49784	1.76006
1.07645	0.804705	1.24901
0.857799	0.680984	1.63133
1.99152	0.652142	0.571121
1.00519	0.547711	0.574087
0.40785	0.571594	0.603037
0.59918	0.791451	0.726703
0.598155	0.686207	0.574848
0.319142	1.14322
0.872419	0.571489
0.826278	0.876196
0.735392	0.797671
1.1519	0.590623
0.484671	0.799299
1.38827	0.585453
0.378981	2.79688
0.568184	2.31042
0.678518	1.3126
1.07634	1.04566
2.33333	1.0982
2.60161	1.43603
2.25714	1.25326
1.19004	0.421077
1.09532	0.487793
0.886538	0.441235
0.925984	0.89378
2.38758	0.736677
1.73408	1.16256
0.777646	1.35966
0.772345	0.621014
0.984826	0.365359
1.00774	0.491993
0.836671	0.830503
0.998631	0.732713
1.66405	0.742793
1.20308	0.511781
1.81272	0.569024
1.26846	1.14797
1.20592	0.909898
1.16377	1.47593
0.536033	1.47824
0.410214	1.07669
0.640541	0.974433
1.07653	0.997608
0.733921	1.11949
0.79628	0.665791
1.30958	1.68901
2.25588	1.8694
1.81769	1.39562
2.35853	1.37438
1.99251	1.57046
0.772213	1.50789
1.51419	1.11513
1.85554	1.61862
1.5095	1.68127
1.48482	1.94729
1.9	1.33197
1.42971	0.549577
0.830478	0.588497
0.517976	1.02007
0.85591	1.22928
0.94908
0.767699
0.285628
0.3188
0.233451
1.84436
1.03724
0.824152
0.769432
0.847589
1.06039
0.361869
0.319798
0.607289
0.618837
0.988711
1.8453
0.574955
0.687755
0.916851
1.15629
0.809745
0.689095
0.77111
0.46559
0.610411
0.593222
0.560913
1.07403
0.49034
0.593562
0.772791
1.28339
1.25121
1.83601
1.49209
1.0474
0.631774
0.618259
0.772503
0.778066
0.881106
0.54094
0.678623
0.88491
0.651852
0.833574
1.35798
0.885881
1.14946
0.863259
1.32118
0.692087
0.754131
0.836383
1.19138
0.611854
0.938005
1.04401
0.892837
0.401184
0.632274
0.486245
0.346909
0.617551
0.4231
1.0564
0.730064
0.873572
0.605846
0.516218
0.630331
0.787986
0.480104
0.562619
0.802211
1.5992
1.17455
1.43918
1.85997
1.72701
0.921837
0.957557
2.7353
0.96278
1.25904
1.36242
1.23014
1.57981
0.808327
2.30331
1.48128
1.41798
1.77226
