# Supplementary material for: Critical role for Piccolo in synaptic vesicle retrieval
Source: eLife. 2019 May 10;8:e46629. doi: 10.7554/eLife.46629 (PMC6541439; doi:10.7554/eLife.46629)
Supplement: Figure 8—source data 1. [file elife-46629-fig8-data1.xlsx]

## Sheet: Fig. 8 B
norm FM1-43 intensity
Pclowt/wt	Pclogt/gt	Pclowt/wt + Rab5Q79L	Pclogt/gt + Rab5Q79L
0.968684	0.419215	0.932171	0.927682
0.932391	0.268322	0.743969	0.556422
0.759329	0.344313	0.555043	0.653347
1.14595	0.398061	0.694999	0.894213
1.01447	0.617778	1.76264	1.21332
0.772585	0.38785	0.73977	1.56538
0.79048	0.858209	1.24316	1.67892
1.07025	0.631974	1.13696	0.747593
0.690586	0.555838	1.32061	1.85254
0.721586	0.317292	1.36247	1.33626
1.45368	0.401031	0.900156	1.53431
1.25222	0.317147	1.13965	0.911312
0.780048	0.527081	2.28248	0.783452
1.82907	0.642626	1.10371	1.30655
2.00032	0.592421	1.19166	1.56959
1.51496	0.541567	0.698118	1.00172
1.38305	0.833361	1.03692	0.796203
1.90883	0.676455	0.487024	1.51938
1.40753	0.415016	0.651248	1.35893
1.34277	0.349092	0.501149	2.16635
1.2039	0.288241	1.61471	1.28909
1.40217	0.953904	1.95946	2.0758
1.18355	0.343368	0.936594	0.914061
0.823514	0.682828	1.293	1.0241
1.31756	0.393498	0.887695	1.33104
0.99795	0.606402	1.21796	0.750492
1.80386	0.557867	0.644725	1.46484
1.29337	0.509912	0.828513	1.39522
1.73504	0.529691	0.737016	0.929132
1.0567	0.529691	0.969194	1.11849
1.07061	0.837855	0.850896	1.7241
1.10422	0.657111		1.72533
1.44687	0.999835	0.373384	1.31082
1.50497	0.808224	0.523999	0.748098
1.25838	0.867341	0.983348	1.34878
1.41999	0.935145	0.568841	1.14363
1.63152	0.720791	0.728046	1.46563
1.02852	0.851041	0.911016	1.06134
1.37204	0.711299	0.637336	1.10842
1.27801	0.941373	1.42368	1.51974
1.45984	1.15834	0.719286	1.22027
1.02215	0.868785	0.571935	0.90182
1.2904	0.824959	1.1429
1.24585	0.924348	0.779475	0.80725
0.943477	1.0985	1.18253	1.04102
1.78293	0.835031	1.0838	0.821337
1.28996	0.775339	1.47047	0.894183
1.44665	0.863282	1.16111	1.57338
1.5961	1.13044	1.06381	1.24632
1.56792	1.08249	0.397382	0.925277
1.53344	0.929856	0.612137	1.48834
1.45737	0.666968	1.13866	1.04703
1.84291	0.64596	2.41631	0.637047
2.21526	0.752302	1.75458	0.75021
1.0809	0.622052	1.48061	0.618092
1.16008	0.810688	1.52934	0.794076
0.686597	0.831842	1.27038	1.34952
0.841409	0.463696	1.12514	1.08391
0.74144	0.283532	2.37468	0.740304
0.8848	0.467605	1.7461	0.653027
0.634078	0.608651	0.991366	0.923906
0.815762	0.550334	1.61988	1.26591
0.803231	0.662474	1.20406	0.455852
0.606772	0.82119	1.0618	0.748835
0.971728	0.858284	1.25692	0.582873
0.82279	0.956948	0.844761	0.728106
0.637412	0.987009	1.86115	0.366457
0.674866	1.12095	0.874196	0.919093
0.815982	0.910078	1.95902	0.965883
0.51542	0.698478	0.909645	0.60538
0.636542	0.879942	0.597422	0.617578
0.698333	0.700288	1.81946	1.15057
0.590687	0.745999	0.733373	1.15406
0.926817	0.7565	0.716425	1.37483
1.36958	0.434865	1.0917	0.884276
0.727239	0.725495	0.793163	1.49034
1.0007	0.766862	0.909704	1.3021
1.09915	0.489268	0.697869	1.14084
1.36052	0.557867	0.88021	0.926024
0.776499	0.308599	0.689622	1.20899
0.523463	0.311208	0.942347	0.940285
0.679064	1.0483	0.980428	0.931694
0.724195	0.66023	1.04617	1.62006
1.22802	0.726874	0.711442	1.89001
1.05503	0.559826	0.856446	1.0708
0.823295	0.61155	0.450585	1.20835
0.872484	0.683848	0.652514	0.638482
0.879652	0.733832	1.17497	0.510947
0.794174	0.446092	1.40925	0.435755
0.82054	0.488184	0.891551	1.39465
1.08198	0.743684	1.03598	0.863373
0.876033	0.719127	0.842355	0.848598
0.786351	0.539328	1.21494	0.912624
0.650233	0.398281	0.999553	0.912794
0.912037	0.493542	0.678969	2.02603
0.800257	0.858359	0.599595	1.53421
0.871615	0.510492	1.92884	1.0007
0.746578	0.541932	1.73551	1.68809
1.01562	0.634728	0.694146	1.44407
0.841334	1.01649	0.685098	0.919954
0.684353	1.09944	0.986039	0.396753
0.846982	0.945866	0.826719	0.943489
0.909788	1.50765	0.650735	0.502527
0.587643	1.00411	2.44517	0.736582
0.931306	1.14182	1.57458	0.877689
0.888494	0.866761	1.04949	1.03529
0.649578	0.806345	1.89958	1.45569
0.59728	0.908703	0.644093	1.48381
0.922829	0.733033	0.63046	0.989362
0.641106	0.898996	2.17298	1.30743
0.905079	0.981505	0.961986	0.98581
1.0483	1.02468	1.34053	1.06679
0.439354	0.826554	1.10401	1.13001
0.679714	1.02215	0.880894	1.19713
0.624371	1.16116	1.4258	1.3903
0.56352	1.01164	0.654284	0.986268
0.520778	1.13197	0.58356	2.02156
0.61162	1.13805	1.46091	1.24432
0.876973	1.38385	0.783885	1.19364
0.667983	1.08205	0.709036	1.24003
0.689061	1.16008	1.07767	1.37523
1.95686	0.752666	1.61811	1.35679
1.40775	0.694564	0.658872	1.3797
0.932321	0.640236	1.33818	1.37071
0.695219	1.17398	1.48341	1.85577
0.750492	0.868426	1.10418	0.560772
0.656246	0.83691	1.12194	0.64902
1.38978	0.907688	0.777875	0.652284
0.771136	0.707605	0.79408	0.707716
0.655377	0.989258	0.647017	1.02435
0.446816	0.743029	0.6406	1.15859
0.492967	0.486659	0.50751	1.16918
0.757015	0.555188	0.434379	0.624849
0.522378	0.971004	0.696494	1.06541
0.652842	0.880667	0.821226	1.05883
1.05214	0.861108	0.726047	0.869672
0.927397	0.641321	1.09502	0.527322
0.712464	0.777729	1.0535	0.920239
0.822645	0.787146	0.89802	0.822025
1.02316	0.927392	1.00145	0.721404
0.752162	0.973248	1.56892	0.746488
0.633718	0.703982	1.73196	0.40809
1.6158	0.921524	1.34185	0.663507
0.720791	0.696519	1.63031	0.483975
0.991652	0.668343	0.706116
1.21774	0.359089	0.444286	0.960112
0.91798	1.09668	2.05592	0.487953
1.28142	0.841984	1.16243	0.779345
0.921309	1.25613	1.73007	1.88523
0.90291	0.911092	1.24764	1.67676
1.07539	1.24178	1.29237	1.17674
1.75569	1.3779	1.00729	1.28204
1.08423	0.874944	1.32925	1.12506
1.03388	1.22657	0.735147	0.910038
1.36356	0.99853	1.38646	1.70607
0.865456	0.921234	2.64469	1.58727
1.20246	1.17536	1.73871	1.95218
0.780338	1.26098	0.442622	0.942886
0.718982	1.11219	0.827695	2.25138
0.746653	1.03395	1.99642	1.20729
0.695799	1.04381	2.2571	1.7842
0.955718	0.683843	1.37105	1.55123
0.632054	1.24751	0.414334	1.45268
0.842494	1.02135	0.867783	1.49885
0.557657	0.962091	0.690195	1.65173
0.595905	0.949995	0.749582	1.81883
	0.935	0.765902	1.64285
1.13522	0.817426	0.842813	1.53933
0.774322	1.17507	1.31069	0.963666
1.36584	1.01664	1.8446	1.64569
1.14376	0.843068	1.05917	1.45587
0.819737	1.08865	0.768877	3.57816
0.990564	0.695579	0.948243	1.64907
0.590033	1.00077	0.745342	1.30974
0.839206	0.482965	1.47935	1.73004
1.0113	0.430661	1.27238	1.51891
0.942687	0.502594	1.53243	1.80959
0.938566	0.689856	1.36555	1.02811
1.06919	0.890229	0.946465	1.15028
0.993199	1.69991	0.598335	1.42817
1.38268	1.03084	0.765787	1.20958
1.49848	0.608721	0.899221	0.876467
1.24604	0.376838	0.702848	1.21455
1.15916	0.689786	0.874311	1.75738
0.927628	0.62915	0.63344	2.17413
0.983522	1.49685	1.21368	2.11002
1.16122	0.478616	1.05425	2.61662
0.755138	0.763963	1.00282	1.16092
1.23911	0.479126	0.825115	1.63698
1.04302	1.13298	1.03661	0.946072
1.02223	0.955933	0.892634	0.659838
1.40587	0.800981	1.34013	0.797809
0.816872	0.833941	1.7311	0.968628
1.28544	1.17999	1.58495	1.3259
1.48708	1.18709	1.69588	1.01818
0.727706	1.16811	0.698382	1.04694
0.755252	1.0412	0.714876	1.06221
1.09869	1.41239	0.572792	0.992421
0.825632	0.711734	1.34511	1.03469
1.15309	1.54821	0.871276	1.24511
0.861599	1.78959	0.722036	1.38024
0.99887	1.13291	1.49739	1.51394
0.995376	0.828653	0.86429	0.968983
0.893898	1.03779	0.864744	1.02297
0.898363	0.803081	1.35989	1.1366
0.659614	0.940648	1.13173	1.22167
0.764815	0.892038	0.940625	0.653099
0.542789	0.947746		1.41876
1.14342	0.889649	0.945189	1.31329
1.07321	0.942098	1.18365	1.01977
1.25686	0.896462	1.50718	0.822141
1.15246	0.897257	1.43988	1.00254
0.774034	0.676455	0.971458	1.47914
0.780163	1.01121	1.27119	0.856227
1.47894	0.998165	0.823906	0.880376
0.981345	0.637407	1.23977	1.07517
2.05798	0.885595	0.744708	1.05191
0.874196	0.924858	0.606382	0.685408
1.4573	0.966365	0.463265	1.36745
1.02355	0.707096	0.525947	1.07499
1.26952	1.01555	1.08209	0.832078
0.804674	1.10444	1.61178	0.969522
0.85988	1.02628	1.28541	0.85162
0.946698	0.694999	1.17585	0.791242
1.31945	1.10277	1.2087	1.20622
0.780562	0.951875	0.767791	0.889075
0.75021	0.618138	0.732101	1.30512
0.841494	0.626691	0.965075	1.19272
0.940111	0.577356	1.23088	1.75205
0.903461	0.53331	0.696055	1.06932
1.03506		0.58472	0.746852
1.03706	0.320873	0.95814	1.90174
0.800493	0.399847	0.574783	1.11885
1.26711	0.405862	1.25131	1.7398
0.927514	0.584536	0.642072	1.17514
0.836286	0.807479	1.03539	1.17568
1.08202	0.774322	0.686118	1.21279
0.778957	0.342294	0.849831	2.10613
0.633211	0.738703	1.05474	2.15478
1.26304	0.444286	1.19254	0.670669
1.33967	1.12463	0.846805	0.567322
1.07767	0.657611	1.09594	0.915539
0.664364	0.819966	0.792479	0.882336
0.707317	0.927229	1.20976	0.893878
0.553608	0.960386	0.512273	1.45392
0.841782	0.543417	0.815917	1.2586
0.655718	0.664194	0.957429	1.15436
0.760346	0.604005	1.13696	1.26144
0.952479	0.393604	0.846094	0.914829
1.28217	0.396983	0.846278	0.968811
0.881581	0.424927	0.835263	0.845041
1.3001	0.304549	0.782175	1.81135
1.25079	0.451387	0.690725	1.61213
0.674444	0.252038	0.762645	2.33767
0.727074	0.27924	0.96347	1.62296
0.989647	0.295275	1.02047	1.7034
0.645065	0.454591	1.15844	2.37656
0.76779	0.39784	0.998278	1.40082
1.01914	0.534079	1.02243	2.27446
1.26201	0.392055	0.776135	0.879837
1.5192	0.874311	1.15542	1.4026
0.939194	0.636818	1.24368	0.895287
1.4723	0.347672	0.810771	1.53471
1.04027	0.90535	0.663746	1.88221
0.91268	0.389858	0.785373	1.11672
0.865432	0.633096	0.763711	0.934003
0.7064	0.744196	1.19946	0.487953
1.0098	0.500294	0.790347	0.741523
0.997779	0.810629	1.13056	0.710623
0.636131	0.959355	0.662852	0.807574
0.676219	0.614085	1.47718	0.737969
0.863827	0.543931	0.687356	1.24119
1.2899	0.561341	1.17727	0.706714
1.2907	0.67141	1.57005	1.06096
1.17903	0.59679	1.17637	0.95939
1.27072	0.698382	1.18348	0.818944
1.72669	0.287601	0.907894	1.37278
1.73843	0.342175	0.652205	1.42036
0.725585	0.309362	1.14407	0.950874
1.34465	0.493881	1.22948	0.874875
1.21906	0.345554	1.306	2.07149
1.50254	0.637391	0.715413	0.930095
1.14421	0.397382	1.35323	1.50204
1.24042	0.399674	0.512457	1.6583
1.40032	0.221343	1.33707	1.219
0.970059	0.734464	1.07836	1.27901
1.25256	0.240413	0.501798	0.911276
0.611849	0.388277	0.86016	1.37738
1.37993	0.222943	1.08848	1.53915
0.927225	0.433119	0.665866	1.74139
1.16248	0.322936	0.814312	1.64214
1.10665	0.316807	0.534646	2.05764
0.883012	0.293039	0.713465	2.2274
0.981515	0.411184	0.606737	1.54749
0.948986	0.364568	0.866347	1.3092
1.12949	0.483512	0.485992	1.92145
0.600682	0.161841	0.683803	1.31969
0.65102	0.170372	0.465225	1.534
0.575254	0.230846	1.02686	1.8808
1.14049	0.325856	0.613488	0.718623
1.22456	0.2994	1.51517	0.753248
1.13196	0.262462	1.14921	0.544067
1.23636	0.496975	1.65527	1.56863
0.953625	0.28949	0.798164	1.37117
1.14954	0.514441	0.699792	2.38224
1.20664	0.397785	0.623081	1.20675
1.02859	0.357756	0.66197	2.07683
1.59102	0.542615		1.73146
1.13533	0.378889		1.09221
0.941198	0.372645		1.1366
1.04726	0.546566		1.36531
0.97699	0.246826		1.06754
1.11243	0.774836		1.26552
0.853178	0.490388		0.81876
1.44384	0.649364		0.98284
1.37363	0.726561		0.628595
1.07165	0.645527		0.786451
0.820705	0.988276		0.967206
0.660586	0.709897		1.0979
0.827177	0.583276		0.92637
0.891662	0.623079		1.06238
0.853064	0.726102		1.51412
1.0066	0.677139		1.65813
1.19947	0.810743		1.57165
1.09634	0.301115		1.04623
0.674041	0.302376		2.15389
0.515468	0.381864		1.88221
0.794763	0.739672		2.10044
0.941427	0.642259		1.31471
0.740758	0.461178		1.84191
1.05316	0.421948		1.18917
0.636419	0.402479		1.12063
0.877116	0.544274		1.97881
0.791784	0.442452		1.56099
0.718768	0.720432		1.0013
0.943031	0.509169		1.86073
0.925107	0.310279		1.24706
0.565691	0.516499		1.46138
0.982028	0.22094		1.32448
1.03901	0.35403
0.522968	0.331522
0.981056	0.285594
0.834507	0.515069
1.12154	0.713216
1.05911	0.913652
1.16088	0.853352
1.08832	0.331467
1.42379	0.201182
1.21225	0.257764
0.978425	0.436094
0.77959	0.588657
0.634131	0.419087
0.897561	0.457456
0.848195	0.334675
0.816299	0.341602
1.1453	0.364055
1.22422	0.416625
0.745342	0.447147
0.558764	0.475495
0.949448	0.479102
1.16157	0.515413
1.07498	0.504301
0.685042	0.415021
0.814465	0.342748
1.04119	0.423726
1.22955	0.585967
1.12125	0.331123
0.765273	0.596446
1.04022	0.790816
0.797573	0.876832
1.18259	0.921215
1.35662	0.608644
1.11776	0.297223
0.844244	0.449154
1.15097
0.798375	0.870611
1.11146	0.61633
0.888742	0.419414
0.692143	0.675104
0.851175	0.53962
0.992227	0.477477
0.591921	0.397569
0.639339	0.788742
1.17537	0.570336
1.32352	0.601946
0.564605	0.728903
0.684983	0.765843
0.729022	0.493099
0.508826	0.565729
0.55115	0.668537
1.02012	1.0116
0.608415	0.70653
1.15693	0.912158
0.948188	0.813785
0.93725	0.642256
0.856098	0.88339
0.547712	0.768685
1.36974	0.627333
1.1004	0.934175
1.31276	0.663207
1.45444	0.683987
1.27977	0.691081
0.795739	1.00804
1.20795	1.32748
0.755193	1.21633
1.1224	0.605144
1.09279	1.1121
1.32638	0.6648
1.51045	0.784135
0.777357	0.731745
0.934674	0.593419
0.669465	0.367907
1.16397	1.26977
1.15132	0.760513
0.994634	0.880731
1.15756	1.09558
1.20338	1.02402
0.98415	0.901854
1.77491	0.792124
0.72696	1.00467
0.732346	0.839527
1.1082	1.02544
	1.27847
0.97555	1.38839
0.645625	0.767264
0.417822	1.31257
0.562005	1.11742
0.545489	0.972879
0.531105	0.55915
0.886061	1.06522
0.968272	1.30991
0.759631	0.732284
0.549924	0.67688
1.03948	0.951217
0.590417	0.734588
0.840777	1.21597
1.00521	0.998633
0.890851	0.85853
0.557741	0.985131
0.619712	0.978393
0.880731	0.885522
0.816101	0.806863
0.827998	1.2055
1.16217	1.22787
0.743471	0.976616
0.802955	0.738496
0.904353	0.908249
0.888364	1.0155
1.32643	1.21278
1.14708	0.814141
0.700147	0.859241
0.569638	1.10553
0.68754	0.913395
0.904169	0.952283
1.6068	1.46208
1.30086	1.57413
1.13129	0.729442
1.5459	0.628583
0.940044	0.947848
0.983195	0.475358
0.901682	0.419243
0.715781	0.471804
1.04197	0.696962
0.862806	1.2435
2.00846	1.27317
1.40918	1.06825
1.78383	1.30654
1.57751	0.847699
0.861912	1.23782
1.14584	1.02029
1.28931	0.832605
0.850726	1.16537
1.14371	0.964891
1.67801	0.802599
1.04605	0.688422
0.918026	0.533935
0.786267	0.761935
0.855872	0.930266
0.995092	0.636216
0.725362	0.77845
0.926186	0.63178
1.12719	0.739734
0.966851	0.988513
1.18721	0.944834
0.938255	0.835276
0.910553	0.783596
0.881086	0.975366
0.868124	0.927069
0.705109	1.17265
0.838461	0.98904
0.608697	0.923515
0.922094	0.874335
1.00894	0.700674
1.04854	1.09008
1.0686	1.13056
1.2348	0.692686
0.896365	1.57252
1.34081	0.591826
0.996685	0.833499
1.68174	0.808101
0.941109	0.393305
1.48108	0.634978
1.35768	0.847344
1.21528	0.677052
1.59953	0.642611
1.21296	0.674932
1.12951	0.51068
1.62083	0.598393
0.795505	0.737247
0.788044	0.733167
0.867413	0.545832
0.861201	0.860478
0.834394	0.714874
1.96479	0.525591
0.625385	0.637282
0.897247	0.737786
0.681499	1.10305
1.2982	1.078
1.23161	0.751275
1.10713	0.87806
0.916421	0.885522
1.4303	0.566967
1.41041	0.942518
1.16378	0.653797
0.802599	0.568388
0.960456	1.07748
0.653981	0.448709
0.670142	0.70582
0.784662	0.577442
0.68825	0.752525
	0.794256
	0.724296
	0.630004
	0.840948
	0.576021
	1.03468
	1.06947
	1.0384
	1.74938
	0.677775
	1.12523
	1.10624
	0.733167
	0.829762
	0.557202
	1.04409
	0.833671
	0.719493
	0.7488
	0.897418
	0.982828
	0.734416
	0.661786
	1.21829
	0.873625
	0.680433
	1.20443
	1.20905
	1.13146
	0.849476
	0.798875
	0.8248
	0.910038
	1.44895
	1.15756
	0.847712
	0.642084
	0.912513
	0.579047
	0.77774
	0.812021
	0.945729
	0.832972
	0.707964
	0.583838
	1.00645
	1.19396
	0.652376
	0.876112
	0.88943
	0.669982
	0.68754
	0.851424
	1.03184
	0.519563
	0.976261
	0.799402
	0.648112
	1.36105
	0.692146
	0.443563
	0.758737
	0.66072
	0.401477
	1.2719
	1.276
	1.0606
	1.38288
	1.00271
	1.17336
	0.919791
	0.592365
	0.808995
	1.25166
	0.817865
	0.64723
	0.996146
	0.897958
	0.678657
	0.80739
	0.906117
	1.04373
	1.04072
	1.15099
	0.807218
	1.03238
	1.02634
	0.512628
	0.645981
	1.28806
	1.056
	0.614921
	1.08849
	0.54691
	0.835104
	0.636938
	0.904525
	0.532354
	0.789294
	0.505363
	0.53679
	0.838118
	0.540514
	0.532171
	0.469489
	0.629832
	0.627872
	0.684881
	0.529855
	0.49523
	0.705121
	0.555425
	0.45421
	0.638347
	1.03628
	0.921567
	0.663035
	0.370051
	0.613316
	0.559873
	1.23888
	0.588628
	0.584377
	0.704227
	0.608342
	0.599288

## Sheet: Fig. 8 D FM unloading
	sec	Pclowt/wt
	1	154.902	156.862	182.716	144.72	227.693	102.769	135.024	117.887	148.491	166.058	99.753	128.838	182.311	188.076	146.16	125.68	130.72	260.493	204.058	210.911	184.6	219.332	157.405	107.433	213.405	172.448	126.808	158.881	138.698	165.262	131.177	176.659	178.726	197.482	171.46	193.072	365.551	338.932	439.15	365.145	170.611	240.023	120.542	131.379	208.232	99.559	120.671	140.486
	2	147.449	154.6	175.72	145.818	222.298	102.191	138.78	122.22	144.088	162.466	96.796	124.43	176.692	185.422	148.218	123.578	131.253	257.849	207.671	206.147	178.267	220.177	160.204	106.351	211.409	170.518	128.104	157.552	139.259	167.774	129.25	170.71	177.326	195.771	172.723	191.386	356.884	338.454	436.092	359.768	174.056	243.373	115.215	133.057	206.209	102.147	120.639	138.602
	3	145.822	157.596	177.124	143.356	227.116	97.351	134.378	117.826	149.302	166.582	97.942	122.399	174.799	188.951	141.564	127.858	127.022	254.058	199.711	203.431	181.853	218.454	164.14	112.854	209.802	172.082	126.457	156.329	141.232	168.747	133.061	167.43	179.128	191.412	169.198	191.536	359.657	341.401	432.145	362.314	168.616	244.689	117.876	138.605	206.407	98.672	123.019	134.583
	4	147.489	154.067	180.373	141.44	216.236	99.951	136.869	116.265	144.72	162.451	100.085	120.183	170.93	186.836	146.56	126.191	126.036	254.164	202.258	202.431	179.027	214.649	152.345	98.363	210.348	166.235	125.527	155.893	139.177	166.466	130.067	162.82	171.396	188.814	167.018	186.681	362.754	338.903	435.014	358.744	169.292	239.158	115.006	132.051	201	100.887	119.44	133.736
	5	146.071	153.702	175.324	140.347	219.476	96.636	130.905	116.677	144.448	161.595	97.226	121.713	172.104	180.973	140.342	119.124	127.009	258.253	207.596	208.089	188.707	218.637	157.11	106.32	204.576	165.369	124.97	154.576	133.518	164.878	127.494	162.402	174.32	185.686	170.762	184.705	357.174	328.614	432.28	354.333	170.81	236.898	116.328	129.972	203.401	97.548	121.625	135.662
	6	151.107	155.604	170.422	132.231	218.307	93.676	134.058	114.232	140.284	159.607	97.198	121.134	169.116	181.747	142.249	119.836	125.084	256.596	204.378	206.578	187.676	215.524	149.085	97.479	201.415	163.259	119.235	149.232	130.979	161.713	124.018	163.841	169.064	183.753	163.113	175.705	349.667	330.396	424.812	351.937	165.25	244.085	111.904	131.61	201.429	92.915	121.579	133.583
	7	143.467	150.484	168.013	123.693	219.76	88.089	129.896	114.073	138.515	156.765	90.628	120.753	169.811	184	141.213	123.969	132.293	258.12	203.809	200.618	183.453	215.601	148.607	97.534	202.268	164.177	122.875	153.165	131.817	158.622	120.009	162.28	170.335	185.076	166.082	173.826	342.391	334.43	424.097	349.551	159.069	241.932	115.209	132.153	199.78	93.537	120.162	132.241
	8	140.716	148.191	156.507	114.156	218.569	80.493	130.43	116.067	138.665	157.488	94.055	115.588	167.311	182.72	137.342	124.16	126.4	248.991	203.351	198.764	187.924	204.326	155.235	106.198	196.936	159.845	121.043	149.896	129.698	164.838	122.168	155.893	165.405	177.287	157.896	162.966	333.836	327.623	423.101	348.222	159.565	232.836	116.87	124.644	196.943	95.927	115.245	131.718
	9	139.28	144.587	156.782	108.164	211.333	78.013	126.729	115.909	133.771	155.479	92.966	118.524	164.97	174.711	135.169	121.8	125.351	249.107	202.778	202.151	184.342	198.598	142.476	96.591	195.268	160.11	118.945	148.921	132.131	158.034	123.363	153.845	164.723	174.674	154.247	152.319	323.464	319.493	409.652	336.237	155.222	236.181	116.48	128.989	197.814	91.034	119.769	132.991
	10	137.609	152.32	150.2	105.062	201.12	72.462	127.616	110.72	135.561	154.939	93.951	120.915	162.384	171.867	134.636	115.382	123.387	249.498	201.684	195.653	188.12	201.729	143.079	98.29	190.558	160.457	122.229	147.909	128.576	160.402	124.46	158.207	161.762	174.915	151.665	140.889	312.208	318.628	392.44	336.565	154.958	238.175	113.887	121.881	194.701	90.282	114.176	123.917
	11	139.204	149.547	144.4	96.249	197.227	69.449	126.369	112.387	137.448	155.918	90.759	115.485	162.973	176.307	136.747	118.778	123.911	239.987	195.493	191.902	179.587	190.97	147.341	101.643	194.043	158.948	112.848	147.223	128.439	154.802	118.299	150.381	162.473	176.595	153.262	132.208	304.585	312.594	371.57	329.261	149.282	229.808	111.311	124.056	194.277	91.463	109.412	128.792
	12	137.533	144.707	139.631	90.098	194.24	68.489	125.168	113.341	129.759	155.11	91.177	115.159	161.506	175.444	134.027	115.56	124.209	242.778	197.978	194.831	183.187	192.21	138.82	96.027	190.567	157.851	118.082	145.829	126.838	155.72	123.933	151.683	155.78	171.771	149.902	129.256	300.99	306.493	374.126	327.111	147.088	228.379	108.836	122.537	190.316	90.062	105.81	123.81
	13	134.6	142.791	128.973	87.667	196.018	59.96	121.567	112.845	129.86	155.274	91.604	114.421	158.659	167.284	134.738	117.133	121.018	239.324	190.209	189.476	179.147	191.143	140.805	95.229	189.326	157.826	115.116	144.994	125.262	156.341	121.271	147.253	157.216	172	152.912	120.454	295.715	306.285	374.942	319.082	147.014	229.938	105.785	113.904	188.102	88.768	111.389	123.338
	14	133.031	147.609	123.702	85.956	193.391	66.876	121.415	107.442	135.213	155.787	89.171	116.905	156.076	170.022	136.418	115.551	120.444	238.573	186.391	187.28	180.289	184.716	150.851	103.049	191.213	159.305	114.726	144.473	122.018	155.024	116.723	147.412	156.238	170.085	147.268	116.729	283.643	306.251	360.193	321.918	139.144	225.949	110.627	116.418	185.576	87.254	106.093	124.792
	15	131.547	141.511	118.276	86.498	194.16	61.089	122.201	110.241	131.265	150.899	90.948	114.067	154.527	166.236	132.102	113.964	119.889	238.333	187.702	190.329	176.591	183.101	142.668	96.183	192.616	154.838	111.933	144.28	124.616	154.085	116.305	146.573	156.018	167.54	142.515	112.667	282.758	305.295	360.435	313.304	137.347	221.667	107.706	113.757	181.531	85.548	101.065	121.625
	16	130.484	141.733	108.249	85.702	191.28	60.28	121.652	110.345	134.061	150.765	85.226	114.183	154.488	167.244	130.507	117.471	120.956	236.387	186.342	187.076	172.653	185.604	136.476	91.982	186.037	156.229	109.399	142.649	119.704	150.723	117.067	144.598	158.372	170.409	143.649	109.797	279.382	296.213	353.348	310.435	135.755	221.09	102.814	111.842	182.718	84.441	102.269	109.792
	17	124.853	145.662	105.138	80.004	191.124	57.018	119.512	111.095	128.238	149.979	88.988	117.28	151.71	163.258	131.853	113.676	121.058	234.236	182.129	188.858	174.751	186.933	134.274	88.482	186.143	152.604	113.799	137.018	116.616	152.378	113.091	143.43	151.098	167.97	140.86	107.411	271.087	294.662	359.111	313.928	130.227	218.379	102.994	109.881	182.158	90.119	103.074	112.787
	18	130.036	142.062	102.449	81.467	181.782	52.729	122.311	111.049	127.482	150.171	84.494	113.997	147.893	166.68	130.298	114.084	118.244	230.089	181.276	187	170.409	184.54	143.314	92.518	189.274	154.055	108.637	140.305	116.095	152.003	117	140.085	154.79	165.689	142.079	100.184	271.498	291.328	338.787	309.995	135.671	214.356	101.277	114.847	180.09	87.616	102.931	106.861
	19	126.476	147.396	93.716	81.84	187.191	59.187	117.348	107.442	127.613	145.122	83.5	113.753	148.774	162.68	132.173	116.409	121.053	226.524	183.236	184.551	169.551	179.665	138.451	92.957	179.244	151.976	107.909	141.012	117.183	148.799	111.311	138.887	154.534	168.277	138.494	97.401	264.913	289.899	337.937	305.821	127.278	210.751	102.689	105.853	179.661	84.254	101.051	109.069
	20	126.027	139.516	97.489	77.849	181.049	51.409	117.247	108.128	126.662	148.265	85.006	111.393	147.03	162.4	128.622	109.591	116.64	236.622	187.16	189.52	168.196	183.997	132.759	90.308	183.36	151.091	106.619	134.524	111.704	149.567	115.323	140.689	150.155	165.451	143.963	99.836	258.836	290.159	330.053	299.855	127.718	215.65	101.514	102.91	178.763	86.469	101.102	107.472
	21	126.724	136.422	91.84	77.582	181.582	48.867	118.625	104.576	128.835	147.466	85.308	109.271	143.759	162.449	126.849	111.916	116.733	225.729	176.276	179.889	164.8	174.146	135.256	93.265	184.082	148.591	109.875	133.973	112.668	148.375	111.646	140.616	150.549	165.146	136.841	97.401	263.715	284.923	325.097	304.541	121.856	207.215	97.864	101.407	171.661	84.61	99.505	110.944
	22	125.253	142.902	90.627	76.422	176.502	46.6	117.402	105.704	128.701	148.759	85.171	111.738	143.808	160.436	128.893	109.289	118.653	220.364	172.484	176.609	165.387	164.762	132.085	88.457	179.741	147.424	108.128	138.53	113.72	146.049	110.46	134.47	147.363	162.954	135.332	94.942	256.145	284.188	332.213	293.787	123.157	204.249	97.22	102.678	172.085	86	95.903	105.167
	23	123.987	137.307	89.782	75.676	174.884	47.662	119.762	107.628	126.238	147.912	83.994	110.36	140.037	158.764	127.907	110.969	117.089	225.724	174.916	180.702	168.138	173.918	138.75	94.427	183.146	149.652	104.933	133.994	108.378	147.201	108.753	132.671	144.64	158.345	131.805	93.903	250.667	276.763	317.328	305.696	120.074	208.096	97.593	99.469	168.712	81.825	96.185	103.042
	24	126.284	137.573	81.196	76.204	171.08	47.822	118.293	108.317	124.491	147.28	78.68	110.21	141.863	157.191	128.196	109.036	117.502	221.827	173.578	179.058	160.853	173.96	130.076	86.003	180.64	146.149	110.091	135.686	112.204	146.845	110.61	138.232	146.716	160.409	131.784	92.072	248.981	272.232	317.609	295.787	119.639	205.068	95.921	97.316	167.356	83.243	92.514	96.468
	25	120.151	139.382	90.956	75.018	174.884	47.653	117.061	101.707	122.826	147.735	81.537	114.585	138.75	157.609	128.147	109.436	119.627	222.653	174.102	179.004	162.298	173.424	126.881	85.948	180.716	147.256	106.838	132.756	107.89	146.277	107.485	134.201	143.78	160.14	131.857	93.092	244.382	275.662	319.401	295.565	119.495	200.017	93.282	97.802	165.537	82.367	90.602	94.917
	26	121.68	142.511	89.978	77.244	168.738	47.964	115.305	104.454	128.643	149.494	82.863	111.601	141.421	163.871	129.364	107.96	117.769	227.364	176.036	184.862	164.28	173.561	132.677	89.616	180.412	146.162	105.555	134.21	109.509	144.716	107.509	130.994	147.091	159.183	135.841	87.319	248.087	274.599	309.391	299.15	120.245	197.571	97.198	92.819	164.492	81.994	90.102	98.593
	27	120.569	136.209	87.956	75.058	164.476	49.498	118.555	106.415	127.241	146.204	84.796	113.064	136.558	156.818	126.56	104.902	116.929	219.213	174.524	183.067	161.791	166.546	126.643	84.768	178.204	144.829	108.796	132.534	105.189	145.29	107.402	131.68	144.381	158.293	129.811	88.425	235.295	269.966	310.498	295.43	113.907	201.52	97.435	92.401	163.915	79.136	89.639	95.778
	28	120.662	139.373	86.991	74.262	165.96	49.902	116.527	105.692	123.765	148.832	84.832	110.665	139.073	158.422	123.524	109.129	114.969	218.68	170.356	179.582	164.213	165.369	122.195	81.726	176.537	140.345	107.902	137.165	108.494	143.851	108.729	125.704	147.567	157.662	133.317	86.961	230.628	264.918	304.357	292.077	111.542	195.898	94.22	94.621	162.531	81.181	87.491	98.593
	29	118.898	133.924	84.938	75.031	164.244	45.68	117.799	102.207	126.152	148.473	80.076	109.055	137.223	160.222	127.733	105.924	116.151	219.773	169.52	179.573	166.356	163.567	130.588	85.521	179.043	141.823	104.845	130.113	110.524	142.329	107.96	125.784	146.954	161.884	127.302	89.444	231.638	267.512	302.71	290.957	112.685	192.763	93.006	92.13	158.718	77.435	88.722	96.569
	30	117.289	133.8	80.653	70.924	165.64	43.769	113.573	103.186	122.695	149.22	78.939	113.732	133.39	156.338	125.484	106.271	115.631	217.64	170.302	181.636	160.711	163.186	132.162	90.662	174.71	139.93	104.546	129.823	106.152	138.826	104.601	126.591	141.994	155.951	129.933	87.773	230.019	267.203	296.469	292.85	113.884	188.684	90.407	92.141	162.412	82.299	86.898	89.306
	31	118.178	135.973	81.031	74.996	162.227	49.84	112.204	101.677	123.363	148.515	79.259	108.308	133.57	152.093	124.44	106.116	112.72	211.422	167.098	175.458	164.698	159.152	126.061	85.186	175.198	143.863	105.939	128.18	107.814	140.814	104.735	123.912	143.027	155.979	127.332	87.56	229.444	263.328	286.947	286.333	111.537	187.994	87.288	89.232	157.864	77.209	83.644	90.125
	32	113.876	129.236	79.889	69.578	159.298	45.284	117.857	100.095	122.787	145.573	76.662	108.78	133.896	155.262	123.173	102.12	110.738	215.498	170.92	180.671	164.582	164.527	125.216	81.247	171.82	139.095	102.296	124.927	104.79	140.595	107.116	121.616	144.46	156.198	129.232	88.217	226.763	258.333	285.541	285.444	111.116	185.915	92.593	84.989	156.407	78.723	82.75	91.255
	33	115.716	132.111	84.578	72.493	158.196	43.16	115.235	104.021	121.841	150.5	79.784	107.235	134.232	151.969	126.338	107.298	116.938	213.009	166.262	171.88	160.418	161.701	121.768	80.72	171.171	135.863	104.43	127.159	102.274	140.723	107.759	118.982	140.68	154.546	128.415	86.865	222.614	263.039	291.58	284.333	110.065	183.062	87.011	85.938	150.763	77.864	84.023	90.421
	34	116.991	132.271	77.178	69.662	157.969	48.022	117.482	102.774	121.256	147.186	76.808	110.89	136.436	152.978	126.253	106.849	110.32	206.16	163.276	172.124	155.671	159.768	120.988	81.534	172.259	138.329	103.476	127.409	101.512	138.229	105.832	121.933	144.412	154.25	123.152	85.087	226.15	258.531	286.971	279.295	106.681	179.463	86.537	86.26	150.814	78.791	86.454	85.787
	35	114.853	128.009	81.191	73.524	153.6	44.498	111.442	100.54	118.326	148.073	78.473	111.409	127.811	152.449	123.596	106.929	113.551	209.08	167.52	176.284	155.356	157.601	122.494	84.485	169.259	133.338	105.198	128.137	103.933	140.845	104.061	117.777	141.753	151.488	121.951	83.691	218.106	256.556	273.507	278.155	106.167	178.446	82.446	85.339	149.068	76.893	84.708	84.069
	36	108.724	132.524	83.027	70.169	153.516	41.849	111.601	98.381	125.628	148.107	73.991	111.808	133.338	147.4	122.276	106.031	111.298	210.547	164.204	175.369	160.284	159.061	117.695	77.561	168.619	134.68	104.265	124.887	105.113	137.223	105.22	116.098	144.872	154.948	123.195	86.681	218.551	253.594	283.816	274.686	109.171	174.751	83.158	85.13	144.458	75.435	82.648	78.528
	37	113.742	127.462	81.262	70.2	150.578	45.076	113.939	100.387	120.36	147.57	75.497	106.463	131.732	149.702	124.253	106.707	108.551	204.316	160.453	173.431	156.147	159.826	115.991	76.186	170.982	136.354	104.463	126.07	102.457	137.784	101.03	116.796	142.796	156.744	118.738	82.29	218.594	253.251	280.855	275.623	106.306	175.169	80.593	86.079	143.932	77.571	87.269	83.815
	38	109.893	128.262	78.898	70.364	150.253	42.72	115.369	102.043	120.613	145.125	75.933	110.351	123.909	148.96	119.32	104.249	107.982	201.924	159.52	166.356	154.08	150.53	115.183	73.927	165.427	134.668	101.701	123.97	103.329	138.912	105.479	117.607	142.899	159.811	124.131	84.145	214.667	253.783	266.092	274.251	103.944	170.192	84.757	87.09	147.475	76.209	80.69	79.065
	39	105.053	127.249	79.778	67.782	148.8	48.542	115.848	99.869	120.232	146.232	75.668	107.671	127.726	147.258	122.556	103.498	110.916	204.049	157.836	173.147	151.707	152.561	118.348	78.735	166.5	129.613	104.396	126.122	101.973	137.973	107.921	116.488	144.332	153.354	123.11	83.435	208.807	247.783	263.758	274.372	103.259	173.164	79.972	84.26	143.271	73.322	84.31	82.569
	40	108.093	124.453	77.133	68.498	146.436	44.227	114.93	101.945	125	147.896	73.268	113.543	123.942	146.049	121.787	101.911	109.578	200.631	160.511	173.236	149.596	144.527	115.991	79.787	172.354	134.079	102.951	120.558	100.253	136.549	105.543	110.982	142.232	155.674	119.768	83.478	207.444	243.242	263.242	269.749	104.769	168.887	79.119	83.831	141.718	70.949	83.657	80.611
	41	109.396	122.004	79.267	69.987	148.044	43.538	113.652	98.293	122.704	147.427	75.869	111.424	128.527	146.769	119.116	105.2	109.622	204.769	163.116	174.147	148.76	152.098	114.68	73.79	168.64	131.07	102.729	119.098	100.643	140.488	102.101	108.845	139.841	152.14	116.954	81.469	208.604	245.85	262.362	264.551	102.685	169.774	79.853	81.107	140.48	73.401	82.972	77.472
	42	108.062	121.276	71.658	73.48	145.88	40.298	111.107	96.963	119.256	153.189	75.384	113.872	126.274	141.076	120.751	105.742	105.009	201.756	156.133	168.68	149.849	148.723	120.637	77.692	167.317	132.78	101.409	119.567	98.122	133.546	101.97	112.86	143.683	154.61	118.756	81.889	207.792	242.816	258.386	269.845	102.176	167.571	84.932	85.695	138.401	71.492	83.093	75.657
	43	106.289	124.996	75.716	70.067	143.196	41.662	114.183	99.338	121.494	149.494	75.948	111.68	124.872	144.413	119.698	100.32	106.831	196.311	156.702	166.787	148.889	147.473	115.732	74.707	168.329	132.387	102.293	121.186	100.256	138.887	101.811	109.945	142.427	152.567	119.061	78.961	205.705	239.029	262.56	264.435	101.954	170	81.305	83.282	136.853	68.678	81.389	76.412
	44	102.947	123.071	71.773	68.489	146.533	40.142	109.899	96.232	119.213	150.393	76.101	110.543	124.271	141.489	116.969	100.747	106.48	195.129	154.213	162.4	141.964	154.183	118.363	78.381	165.442	130.25	103.216	119.905	104.598	135.439	101.72	108	144.037	156.335	118.476	79.71	203.193	233.304	251.304	261.034	102.375	168.249	83.384	79.881	143.802	70.418	83.565	77.972
	45	104.124	127.258	72.098	68.458	144.116	38.04	116.439	99.412	118.524	149.729	75.951	110.146	122.244	140.396	113.649	101.942	103.973	197.671	149.964	164.182	147.031	146.988	109.454	70.817	172.418	131.421	104.439	120.564	101.427	134.287	102.485	107.201	141.665	154.704	119.384	82.256	202.527	234.618	253.28	255.401	103.532	168.723	74.944	82.644	139.277	72.39	78.708	78.667
	46	105.52	121.702	81.218	70.813	143.396	39.591	119.052	101.229	121.957	150.878	72.244	109.003	119.966	141.351	116.24	102.516	105.196	194.084	154.049	162.587	145.2	144.341	113.128	73.384	167.698	129.037	101.912	121.948	100.003	133.61	100.777	108.841	143.634	151.393	117.887	83.169	202.169	230.498	248.836	261.522	102.375	162.989	76.966	84.333	140.006	72.52	81.56	77.856
	47	106.093	118.276	79.022	70.644	137.831	39.471	116.549	97.384	116.308	151.39	75.32	108.674	124.79	139.6	116.653	101.404	99.64	194.578	151.058	160.48	146.422	147.204	104.024	68.625	164.521	130.668	102.927	118.668	97.61	131.223	98.765	106.375	142.939	155.787	114.378	85.043	199.749	227.411	243.662	255.773	101.167	164.441	76.559	80.401	138.797	70	78.259	80.125
	48	97.218	119.076	73.893	64.96	140.236	39.933	114.442	96.162	120.091	151.302	76.204	108.857	118.46	133.671	112.587	97.062	105.382	184.72	148.187	157.311	140.827	143.915	108.701	71.037	166.122	130.692	103.869	117.893	98.598	128.918	98.848	105.165	140.482	153.588	117.671	84.763	198.783	224.86	236.995	251.903	98.083	160.475	78.254	79.068	135.136	70.497	75.593	76.282
	49	96.244	123.498	67.964	63.347	139.818	35.942	110.415	93.558	119.985	149.524	74.784	112.241	117.631	138.164	112.756	98.844	99.116	190.702	148.729	157.889	141.604	137.396	105.857	68.607	165.162	127.899	100.396	115.576	99.616	129.75	98.857	102.988	141.03	152.488	116.698	82.28	197.995	224.541	239.894	251.271	99.319	160.791	75.712	80.718	133.48	66.814	73.468	76.505
	50	94.702	116.16	75.973	67.044	139.369	38.067	112.061	94.061	121.701	146.03	72.598	106.652	115.744	133.764	113.947	95.356	102.471	195.929	152.52	161.524	141.267	140.845	108.835	69.991	167.78	130.162	100.805	119.756	98.241	131.838	100.274	100.146	137.439	151.171	112.229	80.923	194.821	224.671	238.155	250.57	100.866	156.48	74.831	77.983	129.452	70.096	74.741	75.324
	51	97.809	114.853	75.076	67.671	136.818	42.436	109.927	97.405	115.436	149.509	72.229	112.674	114.988	134.351	113.276	96.333	106.409	189.444	143.08	154.351	140.564	143.662	105.567	66.238	165.61	123.399	101.634	115.637	95.811	128.701	98.893	102.21	140.003	152.799	111.183	79.928	199.121	223.739	237.947	253.213	100.644	157.237	73.525	77.751	127.345	69.87	74	71.194
	52	100.902	115.213	75.796	63.516	136.276	38.938	112.168	94.534	114.93	151.543	69.067	108.689	114.296	134.227	110.084	92.587	103.324	190.649	143.524	152.387	139.667	139.287	108.985	73.162	165.101	127.421	105.268	115.759	99.549	130.659	99.418	102.732	136.549	149.631	108.421	82.261	197.13	221.778	230.13	245.865	101.065	156.418	77.141	76.362	126.593	71.853	73.898	71.861
	53	97.88	115.484	75.729	61.302	139.351	44.48	113.491	94.409	112.994	149.585	69.905	110.159	117.122	133.818	113.12	98.489	98.209	188.173	143.84	155.391	142.387	136.854	104.061	63.957	162.28	125.732	99.683	114.89	98.174	126.116	98.488	103.223	138.436	151.085	111.939	80.145	191.169	218.594	235.014	249.261	100.347	158.616	78.655	76.085	126.113	70.814	71.741	71.88
	54	94.831	114.156	70.889	64.72	131.867	40.684	110.619	96.046	112.381	152.488	70.326	110.866	114.832	131.493	110.778	96.342	100.844	187.342	145.511	156.627	140.827	138.75	106.75	68.247	163.832	125.616	96.75	116.924	99.558	126.04	96.628	101.256	135.588	150.482	112.86	79.309	188.947	218.56	227.309	242.56	99.722	154.322	75.893	71.395	128.96	71.011	70.5	70.569
	55	91.324	108.147	72.102	64.418	135.542	38.387	110.933	92.259	117.098	147.793	69.78	103.979	114.061	130.364	109.12	94.911	96.72	180.249	138.804	149.08	134.747	133.881	107.024	69.006	161.582	125.36	103.314	114.277	100.479	127.887	99.607	101.604	136.564	152.314	117.616	78.155	190.169	211.097	224.812	245.13	101.292	150.237	74.328	74.198	124.757	69.339	66.912	70.389
	56	95.182	110.831	70.871	61.689	132.724	36.898	109.72	95.402	117.686	149.527	68.963	107.363	112.28	128.2	105.707	93.587	96.191	179.827	136.169	149.529	133.96	132.948	107.134	65.683	164.607	122.991	97.027	113.976	96.384	129.619	102.101	97.363	139.213	150.543	114.912	80.213	188.957	213.271	224.406	241.676	99.773	148.78	70.661	73.056	122.893	65.718	69.787	68.329
	57	94.08	110.556	71.071	62.493	130.533	35.787	107.924	90.067	117.095	144.634	68.546	106.143	111.631	131.111	108.333	93.982	96.84	179.889	138.964	148.111	138.676	134.003	104.119	65.497	161.314	122.162	97.195	113.497	97.381	122.976	99.338	95.841	139.872	152.284	114.296	79.43	185.874	212.966	227.686	233.377	93.713	144.684	72.316	70.774	120.508	65.977	70.069	69.741
	58	92.591	108.964	69.698	61.169	133.218	37.044	111.137	88.79	113.418	146.098	70.912	105.637	110.527	126.978	107.769	97.124	101.529	179.449	138.724	148.449	133.191	131.537	108.454	69.924	158.976	123.277	95.924	114.86	94.524	126.851	93.25	98.445	138.869	151.439	109.159	78.179	185.188	204.725	229.72	231.85	93.37	146.605	70.085	67.887	119.48	66.045	66.755	67.62
	59	91.102	111.898	74.982	63.978	134.929	38.938	109.973	93.479	119.808	147.805	68.704	108.293	114.881	128.191	106.44	93.16	97.013	177.684	137.702	146.809	135.653	130.829	107	66.595	158.976	120.774	94.561	114.518	95.186	121.927	93.759	95.96	132.287	148.555	106.814	76.541	186.237	210.198	219.425	236.357	96.162	143.927	70.802	72.158	120.475	66.407	71.917	67.88
	60	90.284	108.142	69.32	61.907	133.8	35.316	111.918	91.671	114.771	148.909	72.055	109.305	109.735	129.973	109.547	91.987	94.107	180.711	137.076	150.293	136.591	132.256	101.512	62.088	158.36	120.396	99.561	110.03	90.201	124.741	96.552	99.686	133.854	149.159	110.515	76.44	187.802	208.464	227.469	232.367	98.806	145.22	67.311	64.989	116.525	66.401	73.685	69.301
	61	87.458	110.924	70.618	66.547	129.578	37.111	113.643	92.098	112.268	150.57	67.799	103.357	110.698	126.644	109.564	93.516	96.058	180.009	136.96	149.08	135.351	133.82	104.256	67.485	159.826	120.463	96.332	111.274	95.997	128.595	97.043	93.457	139.524	153.582	107.595	76.672	185.99	206.164	210.594	234.43	102.306	144.175	71.068	68.113	120.056	65.367	69.801	67.051
	62	89.093	105.618	73.253	61.049	127.858	37.142	109.412	89.945	116.46	146.622	70.765	106.585	109.884	128.524	106.84	92.076	91.187	173.151	132.4	147.844	130.849	130.951	99.497	63.835	156.192	119.488	100.616	111.146	92.979	127.244	98.811	94.424	135.259	152.939	111.442	78.899	183.329	206.082	220.188	231.184	99.625	139.062	71.333	67.746	118.373	65.158	68.44	65.981
	63	85.231	105.204	69.142	61.04	133.778	35.378	109.235	92.942	114.226	149.985	69.235	105.863	106.753	127.898	110.813	91.404	95.698	177.831	136.156	150.689	134.471	126.54	98.787	62.088	157.78	122.055	99.78	110.073	90.787	127.323	96.878	93.732	134.162	149.637	112.591	78.029	184.469	205.367	217.401	228.768	96.199	134.661	67.062	69.424	116.977	60.977	74.792	66.801
	64	83.222	110.004	73.778	60.089	126.356	36.476	107.75	92.564	113.503	146.698	68.933	102.284	106.131	126.773	109.813	91.329	95.013	177.351	134.111	144.44	131.271	127.841	98.72	61.698	156.207	117.052	97.71	110.177	93.238	122.668	97.433	93.561	134.793	151.034	105.976	75.498	183.411	204.246	216.111	228.401	96.25	132.836	65.537	64.181	112.475	62.271	70.792	66.102
	65	88.556	107.551	67.373	60.036	127.662	34.44	106.924	86.86	116.988	145.607	67.71	107.396	108.009	128.453	104.476	90.547	93.484	174.098	133.458	146.782	130.533	127.637	98.591	60.024	157.168	116.494	97.872	108.826	93.912	120.168	95.457	92.503	136.784	150.268	107.454	76.251	180.995	202.995	212.749	227.517	96.028	133.243	62.893	67.169	112.028	57.938	65.657	63.398
	66	90.582	105.502	71.084	60.684	130.849	34.138	102.671	90.204	116.814	150.457	67.826	103.351	103.841	125.138	106.689	89.564	93.622	176.347	135.56	148.538	129.667	128.207	97.326	59.524	158.085	118.25	94.726	108.494	92.567	119.476	94.451	89.909	135.21	149.537	107.72	78.029	180.744	205.657	215.329	228.184	95.037	127.249	62.876	63.299	112.91	60.045	66.444	61.181
	67	84.6	104.284	65.96	61.164	123.4	38.627	105.043	91.549	115.787	147.088	69.561	112.11	106.543	127.587	105.84	87.64	92.262	171.6	133.72	147.431	127.142	128.716	98.64	62.558	155.421	116.119	98.838	111.28	95.945	122.698	97.979	94.226	133.777	152.451	106.47	80	174.826	202.034	209.928	229.227	92.472	125.305	66.203	64.39	110.215	62.802	60.778	63.532
	68	84.951	103.476	71.827	59.231	123.724	40.396	105.116	89.277	113.643	148.796	68.912	108.073	107.375	123.204	100.831	88.04	89.391	174.258	129.742	145.013	127.04	125.951	99.091	62.506	156.793	118.299	94.524	110.116	92.192	121.643	97.293	92.567	134.399	149.168	111.485	79.787	176.662	204.116	209.348	227.222	92.875	127.554	63.011	63.09	107.751	59.096	61.301	63.25
	69	85.48	105.516	65.987	58.662	126.356	35.538	106.168	88.354	115.485	149.601	70.113	104.89	104.149	123.316	105.222	84.996	92.782	164.818	129.218	140.093	122.511	123.905	99.101	62.28	154.933	115.192	94.713	108.924	92.421	120.915	99.098	91.637	135.823	150.869	107.061	76.019	175.976	202.415	206.464	227.391	91.542	121.028	61.921	62.701	104.192	56.09	61.287	62.444
	70	83.009	98.884	68.444	60.031	122.698	35.489	109.256	88.765	113.274	149.177	70.881	104.421	104.107	120.538	104.804	89.058	89.222	167.16	125.173	139.409	123.222	130.18	98.39	60.619	154.829	115.482	95.476	109.902	94.537	115.363	95.497	86.195	133.018	149.805	108.107	78.386	172.372	199.111	202.647	224.106	89.185	123.96	64.13	60.537	106.61	57.017	61.426	64.157
	71	82.013	98.431	72.476	59.542	127.427	37.102	108.945	87.939	112.738	150.96	66.253	109.71	106.991	121.587	107.182	86.796	92.893	164.551	124.964	140.436	126.884	121.716	97.098	59.378	153.159	114.939	100.466	108.811	92.936	119.058	95.159	91.201	136.991	150.421	104.878	75.391	166.995	199.657	207.932	219.478	92.829	119.435	58.576	60.61	106.294	61.492	61.222	65.31
	72	82.382	101.271	63.182	60.947	123.564	34.662	113.198	84.631	116.552	152.162	66.433	108.744	104.698	123.578	101.298	84.898	90.809	165.084	127.853	138.182	124.444	122.393	94.366	57.515	155.235	114.68	100.966	105.655	91.921	121.229	98.61	89.707	133.165	147.762	108.588	72.415	170.44	199.816	206.536	218.304	91.194	119.791	61.576	59.768	105.633	60.401	60.741	61.894
	73	83.48	100.027	66.818	60.564	126.64	41.849	109.015	90.238	117.835	149.97	67.271	108.329	103.875	121.062	104.782	85.676	86.089	166.271	131.751	142.831	123.507	122.061	97.582	59.698	155.174	111.97	100.174	107.433	93.14	116.448	96.707	88.381	138.149	152.707	103.043	74.155	167.85	199.304	213.425	219.116	91.319	115.853	57.463	61.938	101.26	55.107	55.917	64.12
	74	81.742	101.609	64.716	58.329	122.164	34.813	110.302	87.311	114.009	151.323	68.137	107.32	105.122	120.044	104.702	82.884	89.551	160.027	124.627	136.027	122.44	115.29	98.948	60.262	152.238	113.372	95.387	102.207	92.674	120.381	99.311	88.162	133.729	150.29	103.223	72.44	173.435	194.947	202.251	218.43	92.704	115.294	59.667	59.52	98.638	54.859	63.005	61.005
	75	82.396	100.916	68.28	54.818	119.644	35.311	107.588	91.238	117.335	149.701	66.262	109.509	103.835	121.791	99.444	85.738	85.987	163.662	131.067	139.387	127.116	120.405	90.61	56.564	154.265	113.774	95.375	104.466	90.634	116.756	95.067	85.168	134.317	149.378	109.506	72.952	171.536	196.043	203.971	210.729	91.333	113.672	58.542	57.808	96.983	50.949	57.551	60.537
	76	74.529	98.951	68.48	59.058	121.844	35.453	107.924	89.643	116.436	155.558	66.64	107.116	103.579	119.382	98.32	83.062	89.053	161.671	124.907	137.009	123.613	117.75	93.777	57.463	149.018	113.085	96.372	104.942	91.46	116.579	93.457	86.311	138.515	154.122	106.713	73.633	170.976	196.928	199.551	212.604	89.847	119.712	59.243	60.294	95.78	57.531	61.389	59.287
	77	80.36	95.102	59.436	58.333	117.729	36.2	108.875	91.238	115.457	154.32	65.274	108.97	102.695	118.724	98.667	82.973	90.08	158.769	125.924	134.516	124.249	120.552	93.03	57.119	156.427	111.896	100.616	107.412	94.293	114.36	93.668	85.851	138.933	153.134	108.25	74.314	167.304	189.3	203.633	210.478	89.667	109.819	62.051	57.836	96.757	55.881	57.296	60.222
	78	78.302	98.36	58.6	58	119.316	32.796	108.293	87.213	117.155	154.232	63.902	108.448	102.604	115.782	98.489	82.764	88.098	163.987	129.991	139.511	126.431	121.613	94.235	56.604	157.101	110.537	102.277	107.814	93.463	120.326	105.436	85.506	136.924	149.381	106.613	71.57	169.652	191.995	193.28	208.671	88.069	109.61	55.079	58.068	99.305	50.215	61.412	56.593
	79	79.698	95.987	60.258	58.369	113.471	31.982	106.665	86.552	113.238	154.412	67.277	110.768	101.649	115.591	93.578	78.889	86.293	158.213	121.951	136.116	123.942	116.488	90.591	54.716	158.104	110.024	96.973	105.387	92.085	115.424	93.335	87.604	137.46	151.433	105.171	71.314	167.3	190.599	194.594	208.159	86.19	107.864	60.542	57.537	94.525	52.418	58.352	57.403
	80	78.324	94.991	60.573	57.307	115.996	33.244	109.049	86.348	115.951	152.085	66.637	108.933	99.235	114.32	95.769	83.364	85.898	156.658	122.396	132.089	123.187	118.741	89.296	51.399	161.567	110.216	96.774	104.845	93.604	118.665	95.024	83.659	136.537	151.72	101.262	69.473	164.459	186.715	197.812	204.005	91.537	106.718	57.333	53.412	97.412	53.497	59.185	56.056
	81	77.618	97.209	62.293	57.142	118.347	33.187	107.884	89.348	117.034	155.527	67.213	109.256	106.826	118.022	91.68	79.973	84.018	153.929	120.964	134.529	120.742	120.872	93.832	55.39	153.402	110.162	96.878	102.168	92.424	116.146	93.692	82.332	136.692	153.165	109.488	70.266	160.599	185.039	201.198	207.686	89.616	107.898	53.514	57.277	94.554	50.277	59.38	58.676
	82	78.649	94.738	60.338	56.369	117.338	30.209	108.72	86.36	117.14	157.506	65.14	109.415	98.03	114.027	91.538	77.156	82.271	149.236	121.36	131.689	119.524	112.707	93.427	56.412	151.39	110.756	93.46	104.189	91.588	114.341	96.32	85.564	134.543	152.043	101.939	65.889	161.676	186.522	195.271	200.628	90.667	101.446	55.644	54.763	92.994	51.746	56.606	57.972
	83	75.742	98.378	59.276	54.964	119.2	32.258	104.878	88.716	118.5	156.659	65.918	109.515	99.723	117.036	93.978	79.667	85.556	154.96	121.551	130.578	117.987	110.817	93.823	54.89	152.143	112.811	99.445	105.942	90.317	115.482	95.924	79.774	131.625	146.918	102.238	69.947	159.604	184.609	194.097	202.213	88.407	98.554	53.062	50.429	90.469	52.525	59.944	59.722
	84	71.889	96.604	59.191	54.724	117.449	34.84	106.808	86.482	114.418	155.991	63.832	107.402	98.363	115.804	92.964	76.213	84.36	152.502	117.373	127.716	116.027	116.811	88.64	53.28	148.22	106.976	94.848	102.616	90.232	117.619	101.351	82.909	134.433	152.424	103.183	69.295	161.734	183.536	186.899	199.986	88.796	99.147	49.842	53.277	88.141	43.91	55.644	58.222
	85	74.147	91.049	60.791	56.587	108.96	32.96	105.951	87.287	115.274	152.256	65.03	109.21	96.96	114.222	96.427	81.284	81.822	150.329	123.991	128.978	118.307	115.579	90.698	54.646	153.762	110.875	99.588	103.442	88.396	111.741	97.338	85.14	136.817	151.183	106.134	70.314	156.686	178.879	187.903	203.459	87.079	99.441	54.774	54.249	91.203	41.215	54.468	54.194
	86	75.862	89.404	58.04	57.871	118.236	31.844	106.409	86.262	116.451	156.402	66.893	109.104	101.802	110.436	89.947	77.591	82.08	149.147	117.716	127.747	116.124	116.912	88.732	55.677	152.006	110.598	98.098	98.598	88.732	114.341	100.604	82.369	135.485	154.799	104.738	67.145	155.271	181.894	193.435	194.609	86.532	102.475	52.74	53.384	91.085	44.977	54.106	54.153
	87	70.471	89.484	59.693	52.28	112.484	33.142	106.988	85.454	120.189	151.107	63.659	104.47	98.046	109.284	92.311	78.307	80.924	149.453	122.227	126.573	119.6	111.494	89.034	51.521	149.845	107.287	102.113	98.777	94.835	112.756	97.546	82.046	136.052	153.29	102.808	69.889	157.807	179.227	190.85	199.053	83.282	96.825	47.345	53.842	91.051	44.299	53.644	54.704
	88	73.324	93.676	56.6	52.111	110.102	33.102	106.122	85.14	116.488	151.405	63.088	112.043	99.558	105.511	92.449	77.693	80.836	148.013	116.396	125.418	118.173	113.314	88.668	56.616	150.848	108.671	95.128	101.57	90.299	110.564	92.11	75.634	131.753	147.774	102.027	67.184	156.971	176.589	189.99	198.609	84.685	99.107	51.989	52.203	87.836	39.26	54.458	56.431
	89	69.827	90.253	55.724	56.52	109.716	30.004	105.302	83.595	118.427	153.924	64.701	109.96	96.729	109.778	92.764	80.142	82.911	145.262	115.027	123.396	115.991	113.445	87.595	52.073	153.296	107.817	97.457	102.091	87.826	113.75	99.183	77.338	135.113	151.976	106.564	66.744	156.696	176.705	192.14	195.396	84.648	94.723	47.559	54.576	87.904	42.395	54.671	51.755
	90	69.209	88.089	53.609	52.902	106.92	30.871	103.777	87.491	116.838	155.479	64.857	109.034	94.82	104.382	93.391	72.204	78.996	145.836	117.467	123.933	116.596	114.915	86.198	51.372	148.534	107.976	95.131	103.973	84.866	111.323	97.695	78.332	134.009	151.451	102.823	66.333	161.174	175.401	178.638	191.686	85.782	99.085	50.667	55.226	88.288	39.718	55.009	54.537
	91	67.796	86.142	51.769	53.378	108.764	31.311	109.088	86.229	116.936	152.753	63.329	112.207	93.143	105.173	93.378	72.116	79.262	140.289	112.347	120.6	109.493	111.436	89.415	53.601	148.36	105.274	93.89	102.332	89.613	114.899	97.997	80.003	133.707	150.918	105.256	63.7	150.386	173.874	182.845	190.647	84.241	96.141	55.356	50.554	87.898	42.023	54.171	53.968
	92	68.227	85.627	50.773	54.533	104.667	30.356	105.21	86.034	119.457	157.436	67.012	108.201	97.445	102.391	87.436	74.582	76.471	139.996	112.484	120.947	113.636	109.332	82.189	51.284	148.637	105.726	93.936	99.729	87.765	112.332	92.579	75.726	135.686	151.159	101.503	66.527	150.778	173.116	180.092	192	82.898	92.785	56.864	55.102	86.638	36.864	52.907	55.37
	93	71.662	89.822	57.129	51.213	110.836	30.907	106.387	85.32	120.326	151.863	63.055	107.628	94.851	106.556	87.978	72.307	79.76	141.991	113.369	120.6	114.827	111.412	87.396	51.747	151.811	102.36	95.015	100.463	88.936	112.637	99.091	78.582	136.357	155.963	100.61	65.097	152.928	171.44	175.019	192.435	87.741	96.367	51.158	50.87	84.695	40.638	54.19	51.676
	94	65.644	90.258	57.173	51.907	105.667	33.662	101.866	84.311	115.204	153.271	62.03	105.061	95.213	101.876	86.44	73.529	77.938	137.218	113.569	121.933	110.96	110.241	87.823	53.104	147.905	108.308	97.582	97.64	88.57	109.991	98.043	77.835	132.549	147.765	100.049	66.792	150.01	174.725	176.729	191.246	85.569	93.232	51.932	49.362	86.503	38.638	52.921	54.171
	95	64.2	83.027	51.307	53.196	106.453	32.218	104.375	85.034	110.793	152.866	62.945	104.274	95.899	102.787	84.556	70.311	79.076	138.493	113.68	120.622	109.333	110.064	84.399	50.704	148.909	104.933	95.22	100.256	89.14	110.058	91.957	76.424	133.796	149.29	105.363	64.614	149.691	171.981	175.894	191.121	81.218	91.768	53.056	48.141	83.48	44.073	48.954	54.523
	96	66.316	88.787	53.284	49.956	102.982	32.716	105.14	87.988	113.43	153.518	65.512	108.479	97.777	100.076	84.756	72.098	79.742	133.427	109.444	117.564	111.831	104.72	84.881	48.082	149.168	103.729	95.299	98.838	85.177	106.375	95.729	75.302	133.466	149.573	104.177	61.106	151.638	169.019	175.662	189.932	86.315	91.379	55.921	48.576	84.751	37.492	52.634	49.5
	97	65.476	86.022	53.662	52.547	104.311	33.018	106.11	86.277	114.976	155.457	63.662	110.137	94.201	99.951	86.707	70.933	76.164	138.773	112.947	119.222	111.093	108.104	85.784	52.436	147.811	106.637	94.927	99.506	91.11	110.75	93.753	77.457	132.442	146.878	99.646	61.758	145.845	164.937	174.072	185.57	86.907	88.017	50.22	49.011	82.023	38.203	50.403	53.148
	98	65.324	86.151	52.982	51.378	103.56	31.071	107.945	81.814	118.716	156.503	62.576	110.765	92.155	100.52	85.036	72.52	77.08	136.991	109.458	116.133	112.747	107.564	83.942	55.226	149.238	104.46	92.384	96.262	88.073	107.235	102.134	77.125	136.976	156.137	104.82	61.063	147.961	167.957	177.213	186.333	81.528	91.836	48.712	48.768	86.192	33.78	49.125	51.569
	99	65.4	84.253	50.164	50.004	102.44	30.444	106.534	83.558	110.494	154.668	60.463	106.808	95.134	103.28	88.4	69.88	77.813	132.738	106.48	115.062	107.356	105.049	86.552	55.198	148.32	104.747	89.723	96.564	87.78	109.177	94.704	73.195	135.287	150.186	100.204	60.164	146.271	166.097	176.005	183.155	82.63	89.243	52.333	49.124	81.124	36.667	49.546	51.741
	100	65.844	86.924	49.676	51.467	103.462	27.978	103.082	82.11	111.326	153.875	62.576	108.159	89.393	99.324	87.289	69.489	75.569	133.027	107.6	114.791	106.502	108.899	84.622	51.561	147.491	102.463	91.988	97.201	86.494	110.966	95.381	76.119	134.436	152.811	103.113	63.739	145.594	162.348	167.556	185.589	80.671	85.463	53.198	45.079	78.379	34.537	51.37	52.75
	101	65.631	81.022	51.649	52.929	104.596	30.787	103.354	88.232	112.302	152.951	62.598	110.512	96.948	101.991	86.644	67.253	74.129	133.076	111.498	118.213	108.769	114.634	80.393	47.503	150.445	101.189	97.735	97.018	90.61	106.287	97.869	78.165	137.207	153.027	99.759	61.251	144.266	163.353	173.295	188.415	84.306	88.282	49.898	47.819	78.802	36.994	53.199	52.065
	102	62.462	79.844	51.089	49.898	101.178	30	103.774	80.582	116.494	151.235	61.884	108.043	95.268	96.031	87.742	69.391	77.369	130.876	107.96	114.982	106.893	106.564	82.747	48.729	148.521	102.912	90.284	98.595	86.735	105.591	92.921	73.497	133.308	148.604	100.457	61.116	141.585	164.899	169.609	182.546	80.912	82.994	51.288	48.429	77.243	36.921	50.056	50.093
	103	64.076	85.511	49.422	48.031	102.324	29.791	104.177	80.875	112.543	152.579	60.982	107.073	91.174	99.929	86.591	71.631	75.778	127.533	103.929	113.52	105.804	108.759	80.338	46.021	148.375	103.741	95.271	94.348	86.32	104.235	97	73.588	134.729	150.006	97.149	61.527	148.304	160.633	166.773	183.841	80.343	85.203	46.571	45.158	78.333	35.09	52.352	55.977
	104	61.613	80.236	51.409	49.68	97.742	29.751	103.506	86.244	114.732	151.36	60.098	105.354	91.265	98.004	83.684	69.733	76.902	131.249	109.342	117.556	105.778	104.561	84.777	50.07	144.363	103.747	93.329	96.341	84.442	104.277	94.262	71.497	132.436	148.802	100.055	61.541	142.512	164.396	185.638	181.406	85.935	84.203	46.384	44.169	76.627	34.232	51.542	55.495
	105	61.658	80.778	52.48	47.987	104.178	29.324	102.238	82.82	111.287	150.982	59.091	107.439	88.774	95.969	84.098	66.062	73.773	133.973	105.933	118.436	104.289	103.857	79.463	47.341	144.78	102.97	90.634	96.881	83.366	104.195	90.351	74.052	135.067	149.604	100.518	61.633	145.652	160.831	172.493	182.614	80.329	80.678	47.017	44.35	73.729	33.768	49.931	52.088
	106	63.711	79.876	47.907	51.293	101.96	30.831	105.04	82.091	113.546	151.863	59.912	106.226	90.168	97.382	83.076	72.764	76.031	128.444	105.013	113.982	103.72	104.122	81.034	46.53	148.256	99.357	91.723	94.07	88.945	103.299	91.107	68.75	129.79	150.473	100.71	59.773	145.614	162.57	166.942	173.86	82.005	78.051	48.305	45.582	75.373	31.508	45.454	50.097
	107	64.396	86.156	49.276	49.289	98.48	33.418	100.927	78.768	115.341	151.863	60.415	109.198	90.058	95.738	82.627	67.88	76.018	130.502	104.702	112.058	104.564	102.762	81.399	45.768	144.369	103	99.207	96.067	85.716	105.552	93.808	73.323	137.244	154.482	102.924	61.251	143.469	161.565	169.807	178.213	83.491	78.271	43.853	43.689	78.701	35.407	47.63	53.319
	108	64.458	82.364	50.64	50.396	97.831	26.462	101.506	79.927	115.021	152.36	59.671	108.171	89.558	93.778	85.124	69.658	72.556	128.467	106.72	111.724	105.396	101.473	82.308	46.72	144.881	99.713	93.966	95.146	88.32	102.96	91.695	72.348	136.466	151.192	107.927	60.005	146.546	159.894	174.556	177.908	84.046	75.503	48.621	40.395	73.994	32.977	51.157	52.463
	109	65.36	82.653	50.538	51.036	98.578	32.578	105.634	81.412	111.832	151.082	59.918	109.308	93.162	93.756	80.102	69.062	75.858	126.733	104.004	110.778	104.151	104.396	81.04	47.253	147.616	98.942	96.527	99.549	85.994	105.823	95.512	71.418	134.942	153.265	99.787	60.155	142.324	161.531	168.329	179.372	79.301	74.61	43.65	41.989	72.87	31.418	48.134	51.713
	110	63.093	84.022	57.653	49.476	100.347	30.262	101.851	83.043	116.226	151.57	61.137	106.195	88.646	95.498	83.987	70.013	75.004	126.418	103.48	108.031	100.813	103.716	79.113	43.829	139.582	100.451	93.152	97.884	84.854	103.973	93.341	72.134	131.323	147.534	98.732	57.478	142.092	156.275	171.42	177.164	80.611	72.508	45.09	39.475	73.22	32.65	49.708	56.894
	111	62.284	83.956	54.378	48.698	101.151	31.48	102.686	81.683	111.768	150.241	60.201	107.338	91.015	96.667	83.818	67.933	72.991	125.462	105.596	110.164	104.267	102.463	77.021	44.936	141.293	96.707	88.262	92.277	84.387	101.061	89.628	71.195	135.012	150.399	100.226	61.734	139.773	155.874	170.667	172.343	84.787	73.322	47.977	40.384	68.571	33.226	49.963	51.583
	112	58.804	84.249	52.071	45.773	103.022	29.213	100.866	80.735	114.637	148.137	56.713	104.564	85.485	95.329	83.542	70.084	72.187	121.853	101.307	104.676	97.818	99.671	76.43	44.384	144.43	97.216	89.826	95.607	81.79	103.945	95.595	68.89	131.671	150.159	101.079	58.874	139.594	159.899	166.72	175.072	81.231	70.226	47.395	43.09	68.249	31.655	51.444	47.894
	113	61.653	79.578	54.751	46.662	100.796	32.471	101.235	78.18	116.088	151.009	58.146	106.238	86.04	93.871	81.178	67.978	73.28	122.667	101.36	107.836	99.658	101.25	80.085	44.683	143.707	99.829	89.021	92.848	87.698	105.835	93.137	70.14	130.808	148.174	102.122	60.609	137.304	155.739	167.155	172.787	81.435	74.102	44.836	40.39	66.452	30.977	48.037	51.56
	114	58.733	82.8	50.516	50.289	100.338	33.867	102.348	79.009	113.436	149.445	60.534	104.101	88.149	93.56	83.08	71.604	71.031	123.804	102.382	109.076	99.516	98.317	79.915	47.11	143.61	98.107	91.668	93.36	85.918	107.851	91.637	70.439	134.003	146.628	95.509	61.198	136.396	154.729	168.01	171.72	78.88	70.633	47.497	38.898	64.435	31.085	48.282	50.347
	115	58.231	80.938	44.418	48.169	95.68	26.164	100.631	81.881	114.305	148.524	60.143	105.957	89.64	89.48	80.876	65.538	70.969	124.284	101.636	107.858	100.56	99.497	77.064	41.155	143.985	95.817	92.216	95.747	84.476	104.5	96.909	67.799	129.043	145.223	98.78	54.85	138.981	156.42	173.179	175.237	80.292	73.107	47.226	36.04	68.023	31.949	47.829	50.44
	116	54.4	74.938	46.116	42.622	98.227	33.093	99.351	80.86	114.226	148.21	59.451	106.951	91.018	90.547	81.28	67.173	69.791	124.129	102.093	107.173	96.751	101.046	76.723	43.305	140.854	97.421	92.436	90.128	83.814	103.851	91.497	67.957	130.622	147.034	98.966	60.517	139.449	153.285	163.836	170.502	81.148	69.808	44.469	37.91	67.288	29.582	49.843	48.25
	117	57.058	74.169	46.596	47.396	96.018	30.613	100.412	81.192	120.695	150.89	62.354	107.53	85.271	91.578	78.467	67.596	71.102	121.093	98.938	104.164	97.711	97.207	77.162	44.03	139.146	97.46	92.159	91.607	87.146	100.351	93.021	69.729	130.037	148.479	103.951	54.058	136.56	147.614	163.594	170.15	79.514	72.164	48.893	37.458	67.87	29.192	49.894	50.755
	118	59.52	76.08	46.893	42.32	98.738	29.724	100.668	78.774	113.192	147.466	58.482	105.665	89.052	88.573	80.182	64.747	67.756	120.782	100.133	106.836	103.804	104.232	73.463	42.814	142.25	95.338	87.918	91.723	83.625	104.912	90.698	67.985	126.726	146.32	98.25	56.739	139.039	149.184	171.671	167.44	77.162	71.503	41.842	36.938	70.774	33.056	46.875	50.972
	119	54.258	76.636	49.124	47.4	96.978	27.733	101.192	80.607	112.561	148.933	57.39	108.909	86.494	89.627	78.973	67.218	66.538	116.516	102.031	105.591	97.138	97.274	80.683	47.649	141.71	95.503	91.738	91.433	85.317	98.756	93.131	66.774	126.671	144.058	99.75	55.444	136.208	146.401	161.739	165.188	79.319	67.367	56.056	39.107	68.056	26.678	44.671	51.037
	120	55.507	75.24	48.471	42.636	97.262	23.902	97.634	80.021	115.942	151.131	62.61	103.912	83.238	87.369	78.333	68.169	72.111	112.151	95.4	103.418	94.178	99.418	81.162	46.043	144.171	99.927	88.509	89.351	82.534	103.561	92.296	66.137	129.134	146.585	98.588	56.594	136.217	147.415	163.86	165.923	82.519	66.582	53.034	33.819	66.418	29.842	45.421	47.676
[truncated: 1,435 more columns]

## Sheet: Fig. 8 % FM released after 90 s
% FM released after 90 sec
Pclowt/wt	Pclogt/gt	Pclowt/wt + Rab5Q79L	Pclogt/gt + Rab5Q79L
64.1664	51.526	31.2342	50.4762
52.0343	61.9166	50.6027	40.8626
73.4719	11.8926	59.2103	51.5454
70.539	48.1837	30.7312	51.15
57.2837	45.5004	39.601	62.9247
76.742	42.6429	27.1441	56.1261
27.6914	64.2108	13.1837	54.6473
32.1206	63.3454	46.174	48.8466
21.9198	60.2469	50.3441	46.658
8.98903	40.2636	15.6097	42.9369
53.5459	27.7041	23.2308	44.6936
46.406	13.0848	40.6007	48.8369
45.7599	37.1247	26.322	63.7891
44.8355	40.2811	38.9821	50.1973
56.9466	51.519	15.1405	46.2422
53.2486	17.8333	28.0879	45.1772
50.966	37.5627	49.0378	51.4246
48.9827	48.3816	30.1791	67.2388
37.235	41.6083	48.2669	61.3436
19.3468	34.324	45.0856	58.8933
54.3429	29.6671	21.0616	59.0149
70.6876	26.3199	36.704	56.5582
62.7365	15.149	53.7525	56.7183
56.506	18.1754	34.9916	52.7017
62.687	41.7598	52.0495	40.9266
54.5597	23.2696	45.5543	59.5214
51.6332	35.9204	53.023	64.2633
54.6724	27.7472	51.1112	45.7753
48.4375	32.8534	62.7025	45.7614
57.1426	42.1343	45.2952	47.2387
32.4425	69.2313	58.1426	69.0824
42.0538	75.0349	51.3438	58.695
30.2024	66.8355	68.4556	43.0428
43.7623	75.2519	41.7826	60.4427
40.4937	60.5392	40.7141	59.4768
37.3353	59.4673	57.4465	48.55
29.6401	69.7634	51.5423	48.4602
62.5623	27.2645	70.4575	37.4167
27.7475	45.4924	51.1277	46.0133
25.773	49.0128	54.0358	44.0154
42.5009	42.6643	60.2231	50.3714
72.2602	38.8202	50.7019	46.9032
56.0037	35.6515	35.4656	53.3253
74.2584	28.9947	17.1946	53.7334
68.1038	40.0017	30.1928	44.4377
70.0258	36.0954	20.8583	41.4464
69.6868	48.6011	45.9192	47.2365
66.3154	42.8204	36.7271	47.9739
77.1746	40.6997	36.2358	50.4748
65.258	44.0642	42.4808	51.6164
63.8862	40.309	20.3866	48.8863
50.3152	42.1772	30.1124	39.98
68.1602	35.5894	40.9422	44.6286
64.506	41.7701	72.0224	57.3184
58.4015	46.0665	74.2606	68.5395
58.4015	47.7921	67.0264	53.3965
62.3596	46.4167	68.8011	57.9179
66.0635	50.8181	53.8586	51.0595
62.1699	46.8829	59.888	59.8535
65.6181	38.1869	60.7385	63.5029
62.0552	57.0264	52.4347	60.4819
67.9033	51.4988	52.3077	44.3993
25.0012	55.0756	60.7903	48.1617
83.1772	43.6915	53.3907	33.731
63.144	40.0559	70.6024	58.3357
68.6345	49.4921	60.806	70.8851
78.5795	42.9927	66.8272	37.6694
65.1379	34.2566	59.3964	69.3045
69.3259	50.6619	43.5424	67.2062
68.1776	36.1666	51.2436	41.9418
65.5771	53.5983	50.3922	35.3307
81.0457	45.1069	57.7855	61.0231
69.2247	33.652	72.8674	35.1508
66.5841	49.8958	72.1364	55.7484
66.5841	46.1546	60.5468	51.4338
40.7511	47.7155	50.3616	34.1115
67.5179	44.6853	42.8971	66.2052
70.9175	43.0057	56.2545	61.1406
75.1843	46.7963	61.3082	60.6714
70.9895	44.9719	63.7652	63.1161
71.0515	43.9516	56.7982	56.69
67.5264	41.209	71.9377	45.4413
58.1916	41.0812	68.3476	38.6062
62.7287	44.9549	75.7264	35.7545
79.7731	58.4508	80.2973	41.046
60.2105	60.2523	71.2301	36.5628
68.5429	57.5967	73.6951	73.9165
35.0097	-13.2082	71.9604	41.5273
72.447	58.8285	71.4729	69.563
75.0585	67.5246	76.8255	60.9521
48.6873	47.4966	80.9914	41.8972
49.5306	24.7393	82.2605	74.665
49.3018	65.1181	74.0921	41.6212
44.0963	52.0944	65.6401	46.931
47.5014	24.7393	64.5855	48.9819
49.4607	50.8121	74.7067	39.2359
49.7701	54.9067	67.6141	54.6234
42.5951	-14.2295	65.176	40.2239
47.5782	46.8379	21.2507	53.186
51.7956	51.9616	7.71587	36.1842
42.8749	47.7172	29.2658	47.5167
48.7714	55.4523	6.90587	43.579
51.7661	55.3835	29.6125	58.6256
37.5273	53.7956	67.5218	38.4804
43.5836	38.9675	70.6187	56.7205
46.397	39.4014	56.0442	38.6574
44.9767	42.1819	57.2259	30.033
45.0864	46.9375	67.6054	29.7458
50.3676	39.855	71.0768	34.3223
47.4407	52.8561	64.1302	31.6712
47.2829	58.4346	23.9617	66.9209
45.1342	53.6203	13.5331	59.2969
49.2341	48.2887	19.8696	61.3597
53.7964	53.4387	74.012	47.8009
46.2867	-23.2616	66.8586	57.7358
52.2937	42.4036	57.6489	45.8837
46.2469	48.4259	57.5424	55.8626
49.7999	64.9846	63.8197	48.0686
49.163	47.8253	69.0305	50.3986
43.9033	49.2013	71.472	56.4977
54.939	55.8524	63.8787	54.521
44.007	48.6869	58.5208	59.7501
45.804	48.7153	63.0353	58.8852
41.6339	49.452	58.5463	58.4243
48.303	53.181	80.1152	55.1071
46.9692	44.6375	74.2157	57.2805
66.4619	53.4583	73.5102	63.7109
70.1798	46.5836	55.7992	52.7181
62.3407	39.9714	62.3907	56.2611
61.441	54.9966	63.526	59.5506
64.0677	54.3572	74.0669	59.9842
42.1365	58.2474	61.2117	51.1903
58.0294	56.2968	71.9874	59.1079
68.5859	49.7259	68.5119	59.9267
54.1827	51.4947	32.5697	18.3039
65.4051	50.8157	68.6349	26.8257
75.0065	53.0595	64.6717	35.9694
71.305	48.4896	58.6678	30.5455
68.3919	50.7018	23.3298	48.5768
71.8189	47.1746	9.7834	35.418
71.7405	38.4585	40.2077	11.7049
68.1693	38.8286	15.4728	34.1803
76.5784	45.4104	12.4781	47.2802
65.7735	52.0584	-1.34014	32.5677
68.7551	64.1236	20.7279	45.8605
47.946	58.9508	8.07726	46.7443
57.9683	56.5223	51.2144	58.7795
52.8605	65.8161	53.0605	43.0428
63.5286	44.6092	52.1803	59.761
75.6818	51.8985	47.768	49.1903
77.0079	31.1833	46.0674	49.4555
64.9662	32.1168	48.7738	38.3146
67.9606	64.3349	48.5916	44.7591
62.0572	67.5375	47.2009	56.3895
61.8935	73.9661	48.9633	69.8328
63.7768	55.6944	51.2846	57.6067
66.3724	57.6861	52.3357	61.0756
64.0302	66.1794	45.1861	56.8689
52.5858	66.4981	51.8192	56.1738
66.8095	66.198	55.7307	56.8151
52.6626	68.1554	61.9722	65.6009
53.4179	49.8247	57.9132	58.7939
41.1235	58.6471	48.228	53.4027
54.2455	48.1556	57.1642	61.9547
56.9977	44.0467	51.6397	57.4883
44.5674	64.3876	52.4084	59.378
40.7296	36.6641	63.2942	42.3349
38.1784	46.8638	58.9237	50.7628
49.4047	45.1608	39.7071	25.598
47.7493	40.1885	47.2877	56.1921
37.6254	61.609	45.076	56.1887
44.5674	57.4275	45.698	54.6176
38.1282	58.7599	51.0036	40.1212
56.2791	55.3012	33.5347	29.4636
50.1249	49.6872	34.0344	24.7802
42.6254	49.0752	52.2981	35.9731
45.7412	63.9859	48.6641	20.4645
44.9786	60.7357	48.9362	56.1921
37.9145	67.3633	44.8917	36.0499
42.0921	54.7936	47.1478	48.1042
38.9102	63.0463	50.8325	49.255
47.8517	68.2395	52.8642	38.6384
59.6373	60.5887	53.1342	48.7272
62.0338	63.3749	46.7645	44.2473
72.1324	62.8622	50.1777	40.6227
66.6826	49.8389	47.0222	54.994
62.2485	58.0671	52.3603	39.3897
61.6461	67.0199	44.8836	50.5408
70.0078	64.0632	44.6642	58.6505
72.1468	60.7338	51.0553	41.4863
70.3012	75.7043	46.7779	40.4428
63.338	51.6206	48.8185	46.981
65.7671	57.6346	49.7092	57.0729
71.8333	58.2413	48.6727	48.362
67.2523	47.7724	56.4489	53.771
66.6724	70.2427	55.3516	34.7374
66.4362	53.3052	49.4209	36.7974
70.6809	69.4866	43.0611	41.3726
66.7802	60.5168	71.0091	42.6469
77.6961	61.1694	61.2798	61.0222
75.8055	57.2955	49.2169	68.5508
66.5844	67.748	45.1678	63.5285
67.7833	50.6146	57.6664	53.1426
78.4867	67.5586	55.9022	47.0177
60.8804	50.9077	40.3918	56.9296
62.1249	58.7228	44.3024	58.135
71.7521	76.9922	58.0237	58.5955
71.479	41.5244	53.5411	57.457
54.663	65.1575	41.8629	60.2769
35.7192	60.3801	50.6616	54.8631
41.6212	69.5707	44.5521	54.4294
41.4448	67.4296	57.7153	58.7706
15.3061	32.4655	59.2107	58.3602
17.4734	44.3109	53.3591	53.7411
63.3322	56.026	45.4222	57.3754
69.0449	51.809	42.1372	60.2081
65.8977	55.017	45.9972	59.0378
64.6186	46.0066	50.5887	58.5153
65.6787	59.8098	45.891	59.0377
68.2823	59.0279	48.3298	56.1962
54.5387	55.7525	43.2985	62.2939
68.1811	57.7242	45.4344	60.019
66.6347	59.6801	53.8803	55.8306
67.9518	56.471	52.8544	54.5719
72.2722	51.4833	62.8918	53.4219
68.1155	46.9586	54.6558	55.9314
62.6627	41.0633	54.2135	60.2391
60.6334	40.6045	58.439	62.0448
67.539	36.5386	49.6924	57.3811
68.114	38.4766	53.8651	62.3563
81.9254	35.5606	46.868	61.9915
64.8549	32.4724	54.0271	62.5124
61.5701	36.2622	52.8783	45.2459
64.5256	50.6383	48.6302	42.6426
60.7576	55.1777	52.4978	49.3844
64.7079	48.5506	50.0692	45.0215
64.9089	45.9496	58.8852	52.8227
81.356	41.5348	57.5259	54.9015
73.8315	47.5918	46.9151	47.7271
71.6643	46.6716	51.3307	28.9471
66.6648	52.9628	48.5624	50.1852
66.7017	52.8791	34.2421	56.3328
65.9287	49.5992	49.1794	44.2796
73.1702	51.4968	51.6559	33.9143
65.6015	45.1792	61.1887	74.0054
68.3409	41.7415	55.1205	56.112
64.3137	39.1984	48.5443	51.5436
66.3717	52.962	40.1255	65.4556
68.6337	39.7376	55.7737	38.8925
74.2694	39.2231	45.5749	24.0228
36.5863	46.8577	43.0566	50.9309
51.6477	38.064	57.0951	26.5738
61.7599	48.9983	54.1321	28.2359
63.8341	48.8327	52.9982	44.3321
52.275	53.5785	54.7596	24.5714
57.3761	52.6549	53.196	43.9859
56.4358	54.6788	61.7403	58.2028
37.9209	45.0452	51.521	34.3318
31.6279	52.9802	57.7877	33.9548
40.2381	45.711	55.5868	38.6312
45.5996	50.7206	41.5907	38.2999
43.1956	50.9873	38.8617	39.2657
32.3732	47.9672	52.9535	58.8683
39.6042	48.5354	53.5749	71.2648
34.0096	44.668	46.5592	51.8453
30.9693	57.703	43.7963	57.108
35.9184	57.0172	48.5075	51.2023
37.9644	37.9413	49.6838	58.7332
55.1939	62.7062	60.1617	45.6962
60.8725	59.8512	65.8931	63.7794
55.4865	55.9627	66.6376	58.5736
60.2755	60.6655	69.4773	56.5154
60.2164	45.5669	70.0126	65.61
59.9942	40.4578	60.9385	60.4099
39.9514	51.0526	65.9942	59.559
44.1868	42.6197	61.8166	60.9425
51.6444	48.9719	67.1189	62.323
35.3683	43.0601	66.3903	40.283
38.4112	50.5852	63.8415	45.1374
52.2488	44.9697	69.1655	45.0972
36.361	18.5207	62.2685	43.5293
50.0657	40.2308	60.047	45.28
37.6343	50.0443	45.2663	45.9197
46.2848	66.2898	34.447	45.1496
44.7071	41.4483	44.5541	55.564
32.8087	24.4143	36.652	64.3212
35.8145	29.0053	36.9964	40.7233
42.7458	35.4786	38.4021	32.063
37.287	42.8196	21.6313	58.8375
43.1219	9.22913	21.6489	17.5288
29.1054	13.1162	35.898	40.1843
69.0792	37.628	-5.02749	49.201
73.2629	71.3919	50.4528	22.9214
71.8744	45.4025	64.1911	48.668
71.8357	30.435	5.63741	64.1171
72.7596	36.9838	70.4124	52.7552
69.7833	23.6466	70.5759	35.5738
57.3539	43.1348	67.4171	31.1533
57.9751	35.9509	73.8092	52.0753
44.9818	39.4002	67.8037	28.9084
64.1105	26.7136	65.8117	54.96
	38.9084	65.9671	43.1213
	37.9161	65.2555	52.0753
	39.9792	56.6558	43.5486
	37.3119	62.9278	44.1512
	53.2649	64.6305	55.5921
	39.7386	62.1217	31.4991
	42.9772	39.4065	28.7115
	43.6597	36.0052	36.0749
	39.7979	40.3362	46.2893
	45.5508	40.7307	43.2147
	39.166	36.4211	53.9091
	39.6773	39.0223	47.4023
	42.0117	44.1617	35.4181
	35.5879	34.5367	49.9194
	41.4293	36.631	52.0753
	47.9838	36.0891	45.1528
	38.5499	48.9219	42.5225
	40.7434	28.3789	39.7703
	45.296	17.6259	52.9923
	49.6452	-1.68011	48.9833
	44.1053	65.2154	33.0007
	42.7108	63.7568	45.5526
	45.5801	67.131	28.3469
	46.8116	58.9154	58.5173
	46.4371	63.1412	25.7836
	45.1682	33.9638	46.7716
	38.2696	35.0033	51.1485
	44.0602	48.5033	43.7967
	48.9747	30.0127	58.8597
	51.2483	38.3402	36.4972
	44.4595	32.9468	30.7282
	45.1952	49.1309	36.6065
	42.5415	41.1803	47.161
	38.5505	49.4608	66.313
	43.3902	42.7745	26.7711
	40.2267	44.7859	72.8027
	42.6909	40.4569	41.3388
	39.2825	44.5183	55.6894
	45.2261	33.5006	52.1168
	44.6396	34.9713	44.3296
	38.0362	25.5126	40.4554
	45.8722		40.6972
	45.6478		50.9836
	38.9634		51.2627
	40.005		54.6338
	42.6448		54.2888
	45.8146		55.9872
	42.1373		54.3521
	45.7053		55.541
	41.7956		57.3555
	44.092		54.0141
	45.0041		52.8731
	55.3477		49.7904
	34.4376		52.8656
	34.6268		54.0695
	30.6651		56.1013
	63.6981		46.8666
	44.6113		47.6191
	49.7307		41.2735
	45.1998		51.3111
			51.954
			48.7485
			52.9169
			52.4317
			40.2807
			39.9537
			51.3857
			48.8185
			57.6149
			47.3887
			47.6125
			47.4799
			25.8135
			55.3564
			31.3341
			35.2991
			27.4771
			48.7773
			14.7999
			42.8284
			13.8665
			54.4163
			24.4687
			55.4389
			75.3338
			58.6739
			65.3893
			32.5982
			29.729
			31.6486
			52.9908
			58.593
			52.5035
			39.6985
			62.8712
			68.7998
			50.7446
			54.4386
			45.0449
			45.5962
			29.4999
			57.2228
			51.2971
			48.7657
			54.6289
			47.0158
			46.7732
			51.484
			45.941
			48.6979
			49.0799
			61.5313
			33.9731
			32.2715
			37.7959
			41.194
			59.2982
			29.0448
			28.9785
			39.5682
			55.3706
			50.9284
			50.7279
			25.1535
			47.5698
			36.8175
			58.9873
			13.7304
			35.7486
			48.378
			31.7035
			51.9425
			51.8979
			53.5482
			54.8851
			42.4044
			44.0291
			55.5199
			47.905
			49.3961
			51.5894
			42.2842
			46.8697
			48.6248
			51.7281
			44.7984
			49.6334
			46.4844
			32.6164
			18.4957
			54.7043
			44.5054
			60.9725
			22.9258
			32.2351
			42.3347
			54.8642
			56.7766
			31.6832
			56.6896
			58.1052
			57.1627
			57.4636
			61.8093
			52.6263
			30.9534
			28.1587
			52.5088
			29.4191
			55.3869
			28.2804
			41.7004
			30.9309
			26.8004
			23.7358
			27.4221
			21.3456
			34.2235
