# Supplementary material for: Critical role for Piccolo in synaptic vesicle retrieval
Source: eLife. 2019 May 10;8:e46629. doi: 10.7554/eLife.46629 (PMC6541439; doi:10.7554/eLife.46629)
Supplement: Figure 9—source data 1. [file elife-46629-fig9-data1.xlsx]

## Sheet: Fig. 9 C
norm Pra1 intensity at synaptophysin puncta
Pclowt/wt	Pclogt/gt
1.01738	-0.0511949
0.947607	0.00862496
1.22001	-0.0335458
1.12826	0.077892
1.538	0.332164
0.655437	0.262446
0.872687	0.547423
1.30172	0.381978
1.89532	0.565576
0.0178872	0.605093
0.961513	0.431658
0.339941	0.466187
2.12759	0.395247
1.10703	0.328741
0.946891	0.276671
0.896016	0.0424363
1.54185	0.397131
2.15129	0.182324
1.12056	0.112101
1.07104	0.168284
0.418204	0.684207
1.06067	0.594981
1.22043	0.300105
0.90196	0.366638
0.637789	0.438454
0.488958	0.405227
0.900367	0.518203
0.7953	0.511383
0.715442	0.315339
0.778845	0.512471
1.04984	0.54193
0.820882	0.207642
1.15228	0.705119
0.535508	0.214701
0.536727	1.10119
0.405811	0.490337
0.472316	0.266693
0.63633	0.0566867
1.46685	0.3759
0.616372	0.234235
0.223859	0.408331
0.992618	0.311357
0.409686	0.840707
0.50788	0.732984
1.22449	1.06478
1.08991	0.408942
1.50727	0.624546
1.73529	0.466054
1.15785	0.255812
0.45881	0.655649
1.1	0.522742
1.09649	0.754296
1.13696	0.343735
0.769345	0.119691
1.8712	0.417302
1.41602	0.164065
0.795883	0.202335
1.17499	0.897714
1.2781	0.978047
1.13718	0.782826
0.80366	0.77152
1.40262	0.612843
0.949253	0.263719
0.800473	0.314542
0.947554	0.399627
1.17932	0.585745
1.20822	1.01236
0.796917	0.487843
2.19657	0.558914
1.44121	0.632933
0.766849	0.985399
1.48043	0.731128
1.58839	0.0297772
0.629587	2.53486
0.669052	0.00342435
1.3996	0.312713
0.812285	-0.0326686
0.726405	-0.0128715
0.886674	0.23665
1.05568	0.204247
0.850846	0.0124485
0.910851	0.0660826
1.00902	0.0481423
1.00419	0.164305
0.353025	1.2147
0.862709	1.23651
0.715894	1.09445
	0.743283
0.769528	1.02192
0.489924	0.924175
1.26481	0.651166
1.33242	0.524654
1.16303	0.801854
0.97078	1.05756
0.711481	1.15143
0.781323	1.03858
0.506499	0.896174
0.503073	0.71056
2.2044	0.934576
0.809554	0.926773
1.30395	1.30833
0.719057	1.24721
0.922384	0.940839
0.518387	0.987284
0.713136	1.19965
1.10345	0.158093
0.677889	0.956047
1.08289	1.50636
0.831654	1.51029
0.603617	0.755675
1.1328	0.367407
0.595994	0.745459
0.859488	0.847953
1.70317	0.444823
1.46581	1.01021
2.05726	1.08476
1.47777	0.963291
0.938446	0.448511
1.66095	0.642911
0.331776	0.722369
0.429592	1.44856
0.58429	1.20355
0.375579	0.852491
0.891224	2.10586
0.764958	0.927491
1.55623	1.22361
1.29514	0.207801
1.01759	0.308464
1.09589	0.934523
0.790368	0.94612
1.14727	0.881923
0.467357	1.00841
0.635227	0.803552
0.981036	0.424227
1.20411	0.186889
0.918934	0.305705
0.820581	0.0958579
0.669029	0.488054
0.43943	0.751403
0.632219	0.951985
0.31851	0.902145
0.399566	0.833754
0.989265	0.330279
0.687307	0.788583
1.01514	0.531314
0.803445	0.42444
0.691106	0.211861
0.815033	5.64392
0.783516	1.08083
0.800836	0.556101
1.17721	0.801614
1.25913	0.840813
1.75942	0.528022
1.44462	0.422317
2.8166	0.44546
0.827108	0.301059
0.657047	0.822979
0.948074	0.207351
0.924086	0.111994
1.19063	0.202361
2.00364	0.234738
1.15751	0.221176
1.21467	0.203502
0.472231	0.166905
1.17028	0.743653
0.335226	0.360428
0.969685	0.157961
0.660242	0.694954
0.696469	0.172452
1.65098	0.722103
1.76294	0.239276
0.663156	0.151378
2.30996	0.379456
2.25807	0.0631893
0.718382	0.16709
2.34796	0.260985
1.4114	0.527518
1.76886
2.38936	0.261047
0.994581	1.33999
1.101	0.449618
1.84987	0.519507
1.1945	0.076043
2.16605	0.800323
2.11857	1.24386
2.57299	0.42831
0.845384	0.446797
1.7522	0.469922
0.924506	0.721039
2.52086	0.438194
1.36725	0.170877
1.39156	0.354389
1.5401	0.409871
0.711388	0.181228
2.01541	0.564452
0.440176	1.00304
0.838041	0.986772
1.02286	0.68782
0.581564	0.877088
0.533612	0.703088
1.05608	0.405417
0.81811	0.385044
0.540675	1.14532
0.254731	0.620262
0.453768	0.686187
0.850001	1.41301
0.274615	1.25533
0.41866	1.99413
0.968309	1.12727
1.22085	0.612032
0.611892	0.605645
0.441529	0.278228
0.536409	0.526034
0.321193	0.696607
0.705864	0.903431
0.218806	0.760272
0.366021	0.320026
0.44773	1.01619
0.384064	0.811723
0.660219	0.68353
1.15343	0.422576
0.658704	1.01526
0.971596	1.02008
1.17581	0.786498
1.89002	0.551258
0.660544	1.08317
0.716611	0.980967
0.769388	0.628722
0.844242	0.465166
0.37087	0.166936
0.103086	0.363176
1.11963	0.0717531
0.783747	0.0552946
0.873406	0.139335
0.693647	0.281817
0.387001	0.444231
0.77813	0.543215
0.826713	0.403133
	0.623501
1.27841	0.375811
0.857653	0.86338
1.49223	0.636439
1.45573	0.601657
1.64664	0.627114
1.08224	0.469921
1.37285	0.278624
0.761341	0.635203
1.30943	0.999825
1.11763	0.842376
2.66703	0.300817
3.54701	0.212279
1.135	0.296458
0.812703	0.326902
1.02538	0.298648
1.07076	0.364855
1.17671	1.70599
1.75696	1.75565
6.11786	0.423624
1.6248	0.230928
1.42583	0.389239
8.88085	0.479294
0.86269	0.524472
0.378122	1.14991
0.332291	0.538505
1.06662	0.641801
0.930091	0.600189
0.844936	0.668587
1.20512	0.322287
1.00262	1.29843
0.510745	0.791418
1.77625	0.613757
0.87193	0.874129
0.925146	0.42619
1.14087	0.797852
1.79691	0.468174
0.96152	0.555943
0.941494	1.29747
1.65476	0.402038
1.23686	0.422389
1.03828	0.549393
0.278288	0.448125
0.581096	0.630029
1.7327	0.200319
1.99679	0.128193
0.660071	0.149244
0.646365	0.0278355
0.79226	0.773374
1.38172	0.759808
0.57436	0.90912
0.74626	0.919843
0.501304	0.844196
2.08037	0.522606
0.62087	0.608978
1.12536	0.35194
0.836128	1.21071
1.25226	0.372316
1.00689	0.580793
1.04147	1.14974
1.13832	0.450596
1.0241	0.735538
0.872811	0.549672
0.989395	0.758291
0.988066	0.644016
0.563497	0.473186
0.99803	0.359423
1.59231	0.473675
1.00364	0.986212
0.775125	0.328186
0.556558	0.609887
0.63989	0.680102
1.02547	0.483746
0.502925
1.0303	1.22395
0.540875	1.04663
0.969801	1.07932
0.49968	0.512057
0.623109	0.516245
3.33124	0.394763
0.810169	0.478665
0.502987	0.293445
0.55676	0.70091
0.552988	0.247693
0.429467	0.782696
0.329201	0.134152
0.254012	0.158582
1.74812	0.117016
1.29265	0.113215
0.834134	0.180369
0.365729	0.20571
0.649501	0.860557
0.432929	0.312992
3.55356	0.338039
5.66044	0.418095
0.478696	0.276294
0.575332	0.516816
0.332847	0.281439
0.544563	0.282629
0.558397	0.110171
0.792585	0.395658
0.783298	0.306162
1.00993	0.395211
0.767213	1.44819
0.676063	0.960731
0.549158	0.573972
0.304138	0.277993
0.281231	0.240568
0.959495	0.722325
0.976694	0.802937
0.185993	0.708017
0.151304	0.580911
0.0221423	0.650119
0.420351	0.388041
0.798643	0.408252
0.684917	0.377874
0.960778	0.187754
0.955138	0.465253
0.502662	0.138541
0.374504	0.278272
0.557733	1.22763
0.602904	1.78868
1.40437	0.212447
0.611799	0.173276
0.239379	0.237695
0.688053	0.449707
0.380346	0.294619
0.129084	0.195419
0.407124	0.148044
0.668321	0.792539
1.55918	1.29335
1.14555	0.221115
0.542312	0.156944
1.27386	0.406491
0.776808	0.174265
0.57425	0.241141
1.67654	0.146128
2.04726	0.148213
0.396941	0.434026
1.40849	0.463971
1.56521	0.523863
0.574961	0.462658
0.9747	0.257581
0.58533	0.22314
0.978872	0.226956
1.56147	2.37164
1.07617	0.522781
0.93026	0.221903
0.526334	0.38319
0.839512	0.171592
0.639797	0.37293
0.909787	0.676635
0.691653	1.85647
1.23019	4.77401
0.975457	0.106694
2.00654	0.71239
0.70043	0.226524
1.06482	0.350771
1.62734	0.605309
2.23163	0.803756
0.424909	0.754187
0.570913	0.686724
0.257736	0.555755
1.12755	0.457929
1.07308	2.06713
0.941139	0.817725
0.940768	0.438939
1.24529	0.276572
1.181	0.703443
1.82243	0.386419
1.63276	0.520757
1.39947	0.269294
1.66772	0.24607
0.580076	4.55814
0.802706	0.324148
0.78509	0.387793
1.35735	0.304693
1.0964	0.295773
0.455226	0.00843664
0.904425	0.0495697
1.11976	0.275444
0.663099	0.00828204
2.32479	0.0101372
0.219292	0.0099666
1.23823	0.493917
0.261738	0.0239505
0.426424	0.253518
0.970914	0.00488308
0.092077	0.0503426
0.189455	0.124526
1.22357	0.278257
0.662018	0.655064
0.583321	0.0783254
1.0306	0.381907
0.751174	0.00607293
0.542142	9.28e-05
0.61271	0.17442
0.372111	0.00771057
0.380887	0.0323413
0.52343	0.210176
0.849757	0.0414571
0.261738	0.00533087
0.426424	0.179133
0.970914	-0.000205772
0.092077	0.206823
0.189455	0.191201
1.22357	0.638898
0.662018	0.132886
0.583321	0.136548
1.0306	3.59582
0.751174	0.125763
0.542142	0.21475
0.61271	0.271411
0.372111	0.178608
0.380887	0.258973
0.52343	2.40535
0.849757	0.6298
0.865703	0.34991
1.14379	0.365543
2.51758	0.356937
3.19114	0.452645
0.94151	0.300939
0.608152	0.320208
0.686942	0.300028
1.27233	0.222754
1.14971	0.213684
0.855567	0.479083
0.77769	0.333991
0.725756	0.0975166
0.4846	0.359081
0.784303	1.09661
1.47302	0.415655
0.816628	0.175271
0.879347	0.219632
0.4988	0.330731
1.02427	0.324226
0.724644	0.0996031
0.726776	0.204212
0.853666	0.11711
0.561348	0.0900843
0.494148	0.29944
0.407171	0.567853
0.748083	0.395009
	0.345224
	0.435571
	0.24111
	0.31639
	0.584588
	0.416812
	1.25415
	0.973386
	0.232179
	0.382293
	0.419652
	0.789788
	0.972506
	0.237742
	0.542235
	0.39963
	0.347032
	3.04398
	0.246936
	0.338339
	0.333017
	0.247074
	0.227049
	0.465887
	0.389277
	0.41825
	0.229644
	0.81757
	0.281779
	0.332507
	0.516229
	0.58774
	0.725045
	0.521638
	0.421772
	0.652901
	0.488737
	0.256643
	9.25386
	1.74676
	0.219772
	0.112783
	0.11986
	0.446619
	0.20134
	0.104872
	0.178824
	0.213359
	0.446263
	0.227281
	0.165133
	0.12363
	0.19236
	0.0634459
	0.0860979
	0.259837
	0.112486
	1.12162
	0.09625
	0.120942
	0.13627
	0.117619
	0.442757
	0.894999
	1.59924
	0.150964
	0.173245
	0.258384
	0.105319
	0.440545
	0.164932
	0.16898
	0.743324
	0.531727
	0.456168
	0.164808
	0.168161
	0.108812
	0.124681
	0.150531
	0.32064
	0.352486
	0.88151
	0.904935
	0.431538
	0.151814
	0.469997
	0.369129
	1.46244
	0.278688
	0.356759
	0.341825
	0.301511
	0.183444
	2.53733
	0.348964
	0.0689772
	0.485511
	0.437193
	0.547643
	0.373594
	0.45433
	0.476611
	0.885079
	0.417436
	0.173632
	0.558212
	0.398038
	0.713673
	0.268476
	0.56393
	0.17184
	0.126102
	0.354912
	0.238885
	0.847562
	0.321351
	0.304029
	0.373934
	0.135219
	0.405857
	0.301849
	0.629352
	0.115656
	0.0495387
	0.108502
	0.397538
	0.23275
	0.395272
	0.496976
	0.186003
	0.664629
	0.0418591
	0.207069
	0.446341
	0.303937
	0.37656
	0.615878
	0.110558
	0.414433
	0.493051
	0.138741
	0.307135
	0.270362
	0.438297
	0.304833
	0.329587
	0.297401
	0.514437
	0.138541
	0.317009
	0.270592
	0.606622
	0.332987
	0.14927
	0.609435
	0.308665
	0.250273
	0.633771
	0.236443
	1.50465
	0.751746
	1.2505
	0.390668
	0.461113
	0.666452
	0.592793
	0.744638
	0.527927
	1.34316
	0.549791
	0.940041
	2.59247
	1.41611
	0.0891098
	0.00237864
	0.0967436
	0.045644
	0.0322624
	0.0612507
	1.21511
	1.65668
	0.0642637
	0.0689922
	0.056213
	0.156001
	0.063383
	0.112287
	0.0270552
	0.0289104
	0.0250626
	0.802675
	0.363488
	2.31621
	0.238112
	0.0692235
	1.07209
	0.10861
	0.738024
	0.055827
	0.121157
	0.150347
	1.01024
	0.201307
	0.248836
	0.283031
	0.417524
	0.445816
	0.557702
	1.74422
	0.365451
	0.229506
	0.41536
	0.124773
	0.132608
	0.0437132
	1.03516
	0.5961
	0.161316
	0.222398
	0.34337
	0.127972
	0.0591961
	0.360583
	5.79634
	0.0644801
	0.23592
	0.0727931
	0.507978
	0.502385
	2.15315
	2.67193
	0.172071
	0.123722
	0.435169
	0.287944
	0.667255
	0.475576
	0.594569
	1.11865
	0.475545
	0.762098
	0.578222
	0.247631
	0.10963
