# Supplementary material for: Critical role for Piccolo in synaptic vesicle retrieval
Source: eLife. 2019 May 10;8:e46629. doi: 10.7554/eLife.46629 (PMC6541439; doi:10.7554/eLife.46629)
Supplement: Figure 10—source data 1. [file elife-46629-fig10-data1.xlsx]

## Sheet: Fig. 10 D
norm synaptophysin intensity
Pclowt/wt	Pclogt/gt	Pclowt/wt + Pclo-Znf1	Pclogt/gt +Pclo-Znf1
0.69374	0.472044	0.860657	1.20353
0.850368	0.76243	1.17997	1.52244
0.574749	0.684596	1.34925	2.51176
0.590289	0.430862	1.08041	1.18729
0.910664	0.481588	0.874118	0.92831
0.763924	0.482307	1.00854	1.61864
0.718715	1.03589	1.22261	1.47928
2.50398	1.15142	1.07286	1.67104
1.53337	0.406393	1.61339	1.85574
0.956858	0.651436	1.19143	1.62828
0.816863	0.72418	1.17391	1.28885
1.07137	0.595753	2.07671	1.37842
1.57076	0.641414	2.41076	1.25644
1.05482	0.506083	1.16269	1.20486
1.81005	0.421506	0.960588	1.22491
1.03976	0.63611	0.953338	0.803854
0.974077	0.348149	0.824725	0.828991
0.729298	0.775599	0.859671	0.651784
0.666792	0.792552	0.602577	1.62783
1.71716	0.388613	1.49991	0.95158
0.596073	0.475136	1.11642	1.26446
0.555663	0.706082	1.57364	1.12596
0.839866	0.458476	1.47043	1.76367
0.54772	0.637469	0.616785	0.93164
1.62893	0.656422	0.702162	1.05748
1.17293	0.727299	1.5484	1.49069
0.733323	0.904826	0.986446	1.40864
1.17405	0.788847	1.00532	3.17212
1.47534	0.594633	1.18316	1.81344
0.862763	0.538498	2.02647	1.47461
0.890432	1.21155	1.52294	0.982153
0.843918	0.844317	1.35475	1.23757
0.719276	1.14542	1.66592	1.85915
1.11522	0.475697	1.449	0.676466
0.869426	0.639336	1.50117	0.742011
0.56598	0.513707	1.01785	0.764295
0.940437	0.734735	1.53054	0.884859
1.14246	1.07278	2.28996	0.748517
0.670097	1.15283	1.27491	0.941903
0.636536	0.599965	1.31809	1.74653
0.801855	0.509736	1.85561	1.47917
0.704723	0.432513	0.935214	1.73259
0.923379	0.47591	1.15438	1.90616
1.05471	0.435714	1.08686	2.11206
0.417134	0.454159	1.22768	1.03098
0.403327	0.833228	1.84159	0.795537
0.840293	0.587195	1.30687	0.981353
0.798069	0.467965	0.812117	1.1125
0.863243	0.357504	1.16491	0.830696
0.68601	0.507335	1.35643	1.08792
1.12186	1.08718	1.09032	1.41411
0.7221	0.855777	1.87282	3.2539
1.02835	0.969784	1.89959	1.06583
1.14782	0.691234	1.81783	1.31532
0.956989	0.639761	0.810891	3.24663
0.887791	0.63659	1.28171	1.67016
0.591328	0.504137	1.48557	1.11263
0.690113	0.832987	0.900427	3.76892
0.553291	0.675613	1.43647	0.799215
0.688648	1.13812	1.14936	1.41835
0.670362	0.526368	1.51479	0.76427
1.84811	0.666442	0.929216	1.29714
2.13773	0.555343	1.68821	0.597193
0.759364	0.837918	3.22395	0.560622
1.12727	0.581065	2.26405	2.08218
0.698083	0.573335	1.54438	0.656288
0.553611	0.795616	1.76532	1.22008
0.912821	0.80769	1.40537	1.43402
1.61096	0.854126	0.809852	0.902614
0.782929	0.543	1.15907	0.649704
0.665378	0.798069	1.02387	0.580506
0.815901	0.721513	0.91117	0.727511
0.738973	1.29456	0.895177	0.890245
0.781781	0.587409	2.20479	1.16866
1.11962	0.747023	1.79739	0.893309
1.25548	0.617717	1.64889	1.06332
0.845516	1.0486	1.21659	2.35148
1.84587	0.683156	1.30887	0.610307
1.49738	0.937184	1.06921	1.01542
1.11005	0.79351	2.1184	1.199
1.04133	1.02086	1.3548	0.92302
0.57099	0.750115	1.10792	0.434434
0.736254	0.865108	1.99856	0.613478
1.26937	0.49678	2.55004	1.27902
0.976956	0.367794	1.66821	1.80112
0.765763	0.459835	1.42959	1.56002
1.01414	0.352626	1.73707	1.07459
0.975701	0.507495	0.930469	1.15579
0.768215	0.479214	2.28116	0.646051
0.970638	0.833015	1.98984	1.0288
0.674546	0.532099	0.630965	0.798148
0.680597	0.644986	1.09837	1.07174
0.629045	0.483532	1.87408	0.645573
0.541509	0.459035	1.40003	1.09715
0.721675	0.47996	1.34248	1.329
1.15915	0.478309	0.914048	1.24338
1.07609	0.683557	1.45934	1.43719
0.659753	0.519118	1.24106	0.801562
0.685609	0.651703	1.63156	1.1105
1.05988	0.66519	1.15376	1.08027
0.507922	0.840425	1.58534	1.40145
0.648878	0.595992	1.08251	1.58537
0.658607	0.682889	1.58169	1.42456
0.773359	0.613772	1.19332	1.72888
0.626993	0.451973	1.51692	1.50546
0.650849	0.29281	1.57012	2.00925
0.953684	0.573123	0.845463	1.43613
0.93396	0.721461	2.13432	1.40214
0.806465	0.612413	1.0356	1.93882
0.907916	0.623529	1.23703	1.64724
0.851326	1.08097	0.776293	1.04272
0.622196	1.13801	0.9813	0.637896
0.644132	0.625793	1.95223	1.57799
0.507096	0.53298	0.904585	0.638696
1.35075	0.846583	2.16966	1.05455
0.687901	0.716343	1.27846	1.12537
0.918153	0.415322	2.28468	0.661567
0.797295	0.476548	1.13694	1.01976
1.20185	1.05314	1.39145	0.825871
0.727485	0.904666	1.12913	0.933454
1.2228	0.702002	1.55496	1.22224
0.816594	0.52461	1.81368	0.628994
0.652209	0.520319	0.728419	1.05311
0.685368	0.695153	1.35304	0.84573
0.852606	0.584931	1.68362	0.390985
0.801161	0.862496	1.69911	0.67844
1.10685	0.687954	0.872945	0.44976
0.787326	0.556143	2.24043	0.362037
0.820247	0.574216	2.0523	0.317015
0.528075	0.827843	4.16052	0.799055
0.564459	0.961282	4.12555	0.69118
0.451066	0.780183	2.57608	0.586158
0.968638	0.672229	1.93112	0.816329
0.753527	0.753102	2.85127	0.830109
0.791112	0.704934	1.76836	0.666897
0.766536	0.570537	0.754408	0.746332
0.968212	0.726872	1.18468	0.617958
0.459515	0.599858	0.97693	0.693339
0.819953	1.18079	0.88822	0.79591
0.623982	0.602178	0.807746	1.08225
0.735188	0.589649	1.0739	1.70055
0.921004	0.331276	1.00566	0.904745
0.619877	0.359959	0.946435	1.40441
0.765921	0.855192	0.958403	1.51188
0.667483	0.601644	1.02328	0.955179
0.79943	0.597486	1.09571	1.28206
0.644828	0.598446	0.844558	1.27017
0.514001	0.977036	1.71561	0.750409
1.31703	1.0557	0.955791	2.07026
0.755129	0.945343	0.532287	1.1306
1.10746	0.547801	0.847596	1.32025
0.761526	0.609055	0.648639	1.21734
0.452747	0.519493	0.480227	0.66194
0.653064	0.382242	1.12324	1.00284
0.854554	0.590743	1.23573	0.644826
0.738228	0.589544	1.08134	1.64831
0.65389	0.440406	0.713385	0.475964
0.671776	0.466554	0.90096	0.794152
0.795379	0.517814	0.941184	0.774134
0.836375	0.463915	1.16957	0.804014
0.768936	0.367449	0.856366	1.0114
0.500593	0.83019	1.4571	0.831122
1.78737	0.560569	0.809984	1.6297
1.10991	0.482708	0.501152	0.775386
1.18444	0.721329	1.97782	1.12162
1.12436	0.683584	1.16762	0.911622
0.996041	0.502379	0.98146	1.72545
0.627581	0.568726	0.501073	1.48011
0.734976	0.701763	0.776052	1.36338
0.595646	0.286682	1.41981	0.893016
0.451573	0.642588	1.12561	1.55575
0.587598	0.454426	0.901067	2.69339
1.18037	0.516986	0.982793	1.87353
0.892645	0.498674	0.872759	3.36623
0.908317	1.09027	0.531326	1.85587
0.646106	0.775254	0.989643	1.43207
0.560648	0.89483	1.58284	0.920631
0.642775	0.570085	0.774053	1.71939
0.893125	0.374272	0.933746	2.52903
0.817449	0.537459	0.738627	1.51873
0.675054	0.393091	0.993509	1.12383
0.724101	0.537832	0.997053	1.54187
0.947794	0.593675	1.09131	0.909143
0.839919	0.667884	1.59158	1.77284
0.753902	0.592501	1.05348	1.73739
0.588584	1.14299	0.869559	1.71231
0.712212	0.47887	1.09387	1.69634
0.794871	0.993775	1.01987	1.19708
0.818621	0.684463	0.80236	1.11567
1.19839	0.649998	1.03637	1.35957
0.43734	0.48564	0.749449	0.970559
1.36741	0.567846	2.14021	1.78358
1.27286	0.428064	1.04509	1.57615
1.55493	1.02923	1.94213	0.853061
1.59299	0.672841	0.789272	0.840986
1.43378	0.702109	1.09541	0.98306
0.684463	1.13388	1.03424	1.38823
1.46091	0.650824	1.34776	1.45478
0.810091	0.710718	1.35171	1.354
1.13651	1.1229	1.56412	1.92163
1.19031	0.638536	1.24724	1.32199
1.60728	0.353294	0.681024	0.834028
1.30343	0.487665	1.11431	1.90518
0.997586	0.413509	1.569	1.26177
1.75426	0.7088	0.888672	1.24612
1.40246	1.11362	0.916233	1.52046
1.70577	0.656875	0.872917	1.07428
1.07819	0.643121	0.74841	1.84396
1.26329	0.597727	0.942729	1.17173
1.52142	0.540416	1.28776	1.06793
1.03299	0.600151	1.05236	0.83035
0.68974	0.456664	1.6636	1.02312
0.802015	0.361344	2.00381	0.526581
0.850475	1.09925	0.904984	0.72386
0.562167	0.880035	0.921111	1.17567
1.01169	0.836721	1.38193	0.654822
1.00646	0.729085	0.973862	1.08459
1.68778	0.977862	0.950246	0.554917
0.931214	0.546254	0.741452	0.845062
0.584957	0.485266	2.10595	1.07729
0.98258	0.71709	0.858257	0.967119
0.93396	0.526342	0.728178	0.723992
0.942409	1.27462	1.03866	0.745664
1.00071	0.748756	1.35845	0.855937
1.14171	0.978955	1.0505	1.19462
0.695898	0.84637	0.997347
0.938144	0.635337	1.75517	1.25386
1.41083	0.429102	0.755528	1.08105
1.5009	0.623848	3.10085	1.35097
0.706321	0.865588	1.22776	0.840834
0.735189	0.999666	1.23743	1.00438
0.782395	1.04056	0.606949	1.13142
0.630432	0.695339	1.46566	1.12605
0.675	0.490838	1.02078	1.20805
0.712664	0.782156	1.58406	0.92861
0.830962	0.777865	2.28087	1.07449
0.623954	0.650425	0.981353	0.530911
0.93524	0.738068	2.19109	0.916544
0.916421	0.602924	1.60118	1.07554
1.34979	0.618731	0.858018	0.664855
0.619663	0.546813	0.821393	0.741121
0.507762	0.564379	2.0709	0.366721
0.5466	0.442296	0.996521	1.10126
0.639628	0.568218	1.99922	0.876763
0.778237	0.658821	1.6676	0.62212
1.38769	0.774452	0.81177	0.457813
1.37415	1.42125	0.924098	0.673609
0.737108	1.10781	2.7261	0.790327
0.565259	0.764617	0.6758	0.864053
0.707947	1.25953	1.11756	1.00893
0.912796	1.21368	1.42504	0.926485
1.02739	0.639229	1.83668	1.24433
1.04154	0.848796	1.88237	0.56979
1.05644	1.21134	1.33558	1.03849
0.745852	1.35491	2.02204	0.815531
0.637497	0.575468	1.36783	0.926276
0.671988	0.485559	2.74774	1.10912
0.70011	0.734656	1.11485	0.76219
0.698776	0.585678	1.33412	0.805428
0.9165	0.385734	1.4724	0.913586
1.05482	0.38592	1.84598	1.11851
0.709545	0.60892	1.96793	1.02968
0.829176	0.42809	1.28648	0.77247
0.638002	0.432434	1.59083	0.822349
0.660899	0.349562	0.732497	0.696257
0.462688	0.382429	1.42917	0.810222
0.677986	0.36105	1.42283	1.57884
0.837333	0.260212	1.98984	1.6024
1.86416	0.817074	0.682012	1.32625
1.36762	0.447626	1.12263	1.2176
1.11519	0.654421	0.662232	1.17251
0.837173	0.631179	1.63796	1.50326
0.498619	0.361583	1.7613	1.10081
0.68233	0.678732	1.0349	1.29671
1.03869	0.428703	0.874238	1.5108
0.659087	0.387759	0.840319	1.33455
0.573789	0.865481	1.21414	1.42925
0.855592	0.42393	0.718662	1.25292
0.856338	0.428355	1.61744	1.14971
0.631604	0.576241	1.59297	1.04538
0.910103	0.804919	1.05897	1.19775
0.832241	0.546467	1.48035	0.750345
1.10261	1.16712	1.08211	0.900389
0.594926	1.21651	0.923084	0.739829
0.780769	1.29474	1.82804	0.532259
1.17692	1.63228	2.34756	0.570672
0.971517	1.04916	1.3508	0.556851
0.685182	0.868786	0.898534	0.828378
0.867666	0.649943	0.670149	0.940938
0.552224	0.860977	1.3174	0.812838
1.33942	0.63355	1.23034	0.943663
0.82278	0.546734	1.2151	1.28585
1.18935	0.887258	1.05151	0.970037
0.646238	1.10098	2.73769	1.10549
0.89419	0.934333	2.29265	0.656017
0.76976	1.12711	0.967732	1.05562
0.932067	0.744358	0.715517	1.3812
0.497234	0.700776	1.20073	0.941888
0.538549	1.07148	0.992922	1.22645
0.743131	0.988443	0.702536	1.21962
0.774319	0.609906	0.629978	0.847729
0.898346	0.491982	0.851753	1.88965
0.64901	0.958482	1.28693	1.23475
0.974075	0.916207	0.738307	0.889908
1.31804	0.71978	0.789353	0.620168
0.643866	0.563473	0.308565	0.729807
0.594234	0.815715	1.31559	1.47904
0.489158	0.958296	1.56293	0.946839
0.55705	0.837545	1.0859	1.48207
1.48221	1.54005	1.7601	0.819382
1.20993	0.526581	0.984338	1.40119
1.44903	0.741373	0.881554	0.977266
1.15677	0.548253	1.44812	1.15588
0.529221	0.808384	1.61474	0.97019
0.900375	0.915806	1.37948	0.918098
0.812783	1.39667	1.28206	1.03703
1.32225	0.591676	1.69959	0.808531
0.890059	0.528689	1.66203	0.820791
0.933321	0.742839	1.51167	1.14737
0.69294	0.601804	1.68386	1.49909
0.874092	0.98354	0.808972	0.709538
1.62554	0.794045	1.19396	1.20742
1.48912	0.724553	1.05463	0.901186
0.979968	0.584026	1.34925	1.56987
1.17541	0.988844	0.870173	0.913723
0.986978	0.824753	1.31199	1.15569
0.53943	0.693446	0.90989	1.48901
1.02384	0.8368	1.28853	1.05153
0.779278	0.917647	0.948194	0.849065
0.502539	0.659168	1.39771	0.739482
0.907171	0.587865	0.67404	0.918814
1.57993	0.771174	2.16294	0.975962
1.15358	0.469727	1.16392	0.821652
0.705734	0.626354	0.898028	0.966371
0.85202	0.647839		1.3799
0.880248	1.31399	1.1511	1.07324
2.56105	0.863855	1.10495	1.05413
2.12491	0.829123	0.739764	0.75755
1.96542	0.662687	1.24206	0.818774
1.30788	0.69262	1.7049	1.11641
1.31506	0.708828	1.07512	0.882486
1.09874	0.826219	1.21702	1.53231
1.29802	0.625234	1.28972	1.48766
2.00176	0.642214	0.99801	0.929045
1.11146	0.980634	1.61074	0.696148
0.998813	0.852261	0.83268	0.88433
1.17178	0.600925	1.648	1.33438
1.46305	0.692595	0.347982	0.740815
1.50913		0.498741	1.35033
1.34187	1.17174	0.597936	0.824316
1.99328	0.771548	0.816875	0.763728
1.75325	0.740022	0.850156	1.8114
1.71174	0.412104	0.674293	1.24417
2.8131	0.75761	0.971607	0.80505
1.63548	1.11908	0.748812	0.678495
1.23951	0.735904	0.657373	0.552677
1.29042	0.682447	1.52636	0.699907
2.37589	0.746276	1.69474	1.61194
0.556969	0.558344	1.01051	0.625091
1.85939	0.49307	0.842746	0.985006
0.893255	0.455869	0.526858	0.605478
0.943583	0.759799	1.04557	0.891562
0.508349	0.715937	1.41132	0.972971
1.23165	0.586811	1.99299	0.800973
0.983538	0.513806	1.21047	0.935115
0.790126	0.672619	1.28499	1.10225
0.937478	0.946794	1.30629	1.15837
1.61538	1.00836	1.74326	0.682612
1.20502	0.831714	1.58738	0.648265
1.5162	0.854788	1.16488	0.583201
0.95539	0.522741	1.36574	0.901061
1.6342	0.969164	1.16695	1.89746
1.47358	1.00224	1.15177	0.718103
2.30222	0.892665	1.30313	0.868259
1.12697	0.758234	1.34953
1.38881	1.18333	0.913908	1.09568
0.965173	0.924549	0.793221	0.542781
0.934173	0.90117	1.14003	0.629286
0.911142	0.887868	1.23845	1.20883
1.48016	0.954735	1.22431	1.096
0.712184	0.990584	1.01305	1.66929
0.950779	0.532658	0.774812	0.734663
1.0199	0.960973	2.26722	0.768514
2.17816	1.03807	1.49743	0.913226
1.76122	1.21415	0.703904	1.20569
3.6109	0.714581	1.05377	0.415769
1.72635	0.656782	0.969047	0.559707
0.97986	0.746103	1.15358	1.94346
1.47509	0.569029	0.687603	0.728649
0.804146	0.958289	0.499514	0.738496
1.26265	0.935545	0.541404	0.700437
1.92136	0.673899	0.731498	1.10652
1.8282	0.743708	1.33644	0.645977
1.75266	0.907464	0.698595	1.03911
1.48106	0.787856	0.576439	0.623702
1.02294	0.555027	1.86789	0.684075
1.03403	0.51748	1.24838	0.645375
1.1322	0.398158	0.766923	0.821192
1.4507	0.52844	0.982659	0.718606
1.7134	0.875725	1.04403	1.55838
1.07116	0.924231	0.901805	1.41579
1.65729		1.13367	1.01373
0.594793	0.664451	0.583189	0.971089
1.14409	0.727374	0.703433	0.986606
0.628646	0.78573	1.73688	0.434541
1.0968	0.564142	0.88759	1.77725
0.99908	0.513115	1.32032	1.70099
0.621475	0.478771	0.689495	1.61381
0.935078	0.559949	1.20918	1.1779
1.13198	0.499107	1.29962	1.09099
0.709839	0.472498	0.82649	1.25449
1.07934	0.608207	0.971265	0.854276
2.47188	0.644413	1.09616	0.901963
1.68543	0.451686	0.931605	1.12185
1.44063	0.638163	0.661277	1.35258
1.59747	0.622927	1.43732	1.24338
1.16069	0.562914	1.51004	1.23067
0.922843	0.404875	0.575014	0.749039
1.2836	0.4805	0.999386	1.48656
0.793324	0.595638	1.35529	0.601293
1.50367	0.47023	0.730813	0.844014
1.06153	0.547474	0.988901	0.753787
1.23933	0.589326	0.7086	1.1966
0.774053	0.267945	1.21267	0.824915
0.904425	0.515031	1.63317	1.87995
1.93656	0.440806	0.790231	0.817977
1.03912	0.425046	1.37235	2.22632
1.19271	0.414276	1.48662	0.709917
1.47078	0.287163	0.948384	0.835169
1.56559	0.295532	0.927793	1.37671
1.20324	1.05604	1.06775	0.785159
1.79054	0.945325		0.967499
1.94775	0.961499	1.6698	1.52737
2.08554	0.65932	0.485833	1.55212
1.11391	0.952317	0.830616	0.607198
0.995719	0.709049	1.55022	0.454673
1.23061	0.857999	0.5994	1.47188
0.937745	0.914071	0.528163	0.932482
0.943235	0.600495	0.740647	0.784963
0.765761	0.391703	0.583335	1.48851
0.862389	0.941844	0.347942	0.97191
0.505176	0.526318	1.05334	1.05385
0.956775	0.503244	1.28229	0.958387
1.26742	0.574622	0.718184	0.576906
1.35634	0.491567	1.01948	1.35052
0.885339	0.60518	2.16342	0.548827
0.809743	0.748992	1.00967	0.597195
0.73612	0.942266	0.995593	1.45653
0.911648	0.799143	0.86848	0.797774
0.64384	0.667704	1.21204	0.744878
0.949606	0.80791	0.977072	0.567755
1.28515	0.795451	0.677849	0.835317
0.546625	1.02334	0.562202	0.805807
0.731296	1.01998	0.993239	0.865476
0.668576	1.07629	0.598485	0.761718
0.793243	1.64004	0.764761	0.620479
0.977647	0.665851	0.870224	0.577172
1.32977	0.988147	0.577336	0.897552
0.655247	0.875613	0.864686	0.589639
1.32574	0.774857	0.590695	0.827597
0.979913	1.11868	0.502353	0.732826
0.663538	0.484887	0.559488	1.12408
1.67563	1.05218	0.751565	0.965794
0.774266	0.702087	0.775969	1.20869
1.04237	0.856755	1.89506	0.692819
1.63924	0.6148	1.82838	1.37741
0.894802	0.878577	1.34591	0.823945
1.07169	0.567395	0.777024	0.962211
1.08779	0.60335	1.38061	0.858797
0.864094	1.01956	0.841739	0.900563
2.38645	0.79635	0.602068	0.439883
0.929961	0.625461	0.709338	0.51227
0.71269	0.67059	0.90384	0.462894
0.584451	0.718551	1.46047
0.600631	0.797234	1.12716	0.604339
1.01153	1.0275	1.63082	0.559201
0.835253	0.791947	0.695228	2.12283
0.84541	0.502055	0.924505	0.73221
1.20158	0.670872	0.898491	1.50371
1.20353	0.4456	1.18827	1.34526
1.06127	0.390342	0.929385	0.868037
0.484759	0.507976	1.70377	1.48757
0.773679	0.356491	1.33823	1.96915
1.03714	0.602232	0.840253	1.32529
1.22346	0.510729	0.687556	0.612679
0.824378	0.619681	1.31055	0.626056
1.40006	0.621112	1.12806	2.49671
1.92299	0.421471	0.535734	0.732314
1.19297	0.487922	1.74586	0.34704
1.62868	0.278074	0.815287	0.977909
0.930548	0.448361	1.10828	1.03374
1.91894	0.502923	0.723425	2.43792
1.16885	0.548459	0.929917	1.68679
1.15099	0.731394	1.54185	1.88889
0.789432	0.604805	1.29558	0.623966
0.803186	0.682127	1.10963	0.516108
1.09557	0.473421	1.1479	0.541424
0.596419	0.492309	1.13611	0.601954
1.37954	0.557994	1.46761	1.14616
1.6302	0.573793	0.797368	1.16043
1.34592	0.556109	0.696878	0.961851
1.30343	0.561521	1.02134	0.915544
0.991828	0.774701	0.695736	2.54444
0.680757	0.579784	0.616584	2.69598
0.812517	0.558189	0.656246	1.99796
0.833787	0.916229	1.29975	0.781051
0.872812	0.773661	0.476503	1.28676
0.778264	0.647736	0.559731	1.55957
0.733643	1.22529	0.668479	0.608041
0.754647	0.763242	0.821223	0.884065
0.639496	0.427283	0.583734	2.08301
0.668337	0.760419	0.489666	0.752608
0.578961	0.621449	0.611805	1.32947
0.61316	0.846369	1.06758	1.32468
0.431128	0.877999	0.410576	1.82827
0.789539	1.1347	0.590703	2.09895
0.596686	0.742923	0.688634	1.3091
0.472552	0.732145	1.41446	0.565216
0.555663	0.801552	1.12735	5.07485
0.697204	0.846369	1.14269	1.07768
0.600178	0.745613	1.08629	1.54052
0.520105	1.00391	0.487093	2.38183
0.634324	0.850264	1.28556	0.671697
1.04261	0.832517	0.927258	1.03647
0.805612	0.715274	1.38357	1.07303
	0.691043	2.65737	1.37367
0.7891	0.664138	1.92944	0.819122
0.810966	0.699874	0.829717	0.967377
0.911219	0.548522	0.818821	1.37314
0.775254	1.30809	0.645093	2.0386
0.963066	0.473515	0.573887	1.40992
0.992684	0.498387	1.76511	0.938031
0.998013	0.636927	0.585854	1.3877
0.544281	0.794083	0.724785	0.996353
0.651501	0.521085	0.415832	0.853727
0.718054	0.664725	0.705044	0.704257
0.766754	0.456237	0.562703	1.32476
0.803657	0.654627	0.595521	1.33345
0.53923	0.834668	1.04495	0.868881
0.493541	0.98792	0.500069	0.982147
0.514401	0.976024	0.626048	0.651683
1.04838	0.686538	0.438898	1.08858
0.943872	0.687321	0.513451	1.40962
1.09362	0.708923	1.23439	0.646735
1.22047	1.29383	0.711075	0.974665
0.976155	0.863842	0.894736	0.905797
0.852587	0.675448	1.84913	0.675799
0.738875	0.547779	0.597531	1.08715
0.507894	1.02632	0.755734	0.608427
1.07184	0.632532	1.47368	0.395481
1.0531	0.66704	0.85893	0.836602
1.69016	0.562632	0.604477	0.945586
0.816464	0.384007	1.06584	0.586962
0.865909	0.864092	0.771596	1.06273
0.999056	1.0242	0.925537	0.724744
0.724221	0.743721	1.06452	0.7119
1.05069	0.621449	1.0131	0.443091
0.757091	0.786324	1.44055	1.0663
1.18826	0.555366	0.873188	0.886021
0.895603	1.03217	0.588466	1.47781
0.868827	0.748945	1.26721	1.76118
0.901798	1.13733		0.555157
0.784584	0.69407	0.774326	0.951171
0.922364	0.669895	0.683399	2.71646
0.952276	0.537893	1.09992	1.77437
0.917273	0.64668	1.59453	0.799316
1.81923	0.681431	1.47546	1.01434
0.996198	0.893399	1.89596	1.25438
1.11191	0.598524	0.870422	1.40838
0.992278	0.818868	0.854127	1.25312
0.762247	0.804939	0.80816	0.919973
1.02156	0.641636	0.777436	1.13036
0.806913	0.531487	0.789821	1.0794
0.498149	0.827409	0.565571	1.95943
1.1134	0.369748	1.06211	0.930254
0.839659	0.725888	0.789213	1.53236
1.2395	0.584539	0.685488	0.763927
0.798393	0.844452	0.641373	1.26682
0.853452	1.22015	1.52679	0.968607
0.932913	0.751026	1.24346	0.670467
1.14182	0.682362	0.556639	1.01374
1.36814	0.716361	0.817523	1.22284
1.21449	0.791447	1.23127	0.729544
0.964447	0.993012	0.805923	1.56595
0.67759	1.03859	1.61226	1.00216
0.642727	1.2893	0.650275	1.11818
1.23521	0.923018	1.19034	0.915648
1.29673	0.939232	0.824988	1.05779
1.09922	1.17399	0.986147	0.935321
1.51211	0.735203	1.41717	1.0403
0.471759	0.87774	0.59188	1.64149
1.13727	1.20162	0.605702	0.643121
1.62671	0.980607	0.959896	0.849298
0.875154	0.51561	0.949216
0.583491	0.68226	1.38606
1.30625	0.928313	0.976517
1.56844	0.881995	1.35081
1.02807	0.650286	0.938267
1.3702	0.843044	0.94212
0.931134	0.987388	0.981169
1.44606	0.956439	2.01943
1.181	0.577915	1.85569
1.03968	1.33883	0.878747
0.946239	1.05195	1.44986
0.735237	0.850881	1.87079
0.609076	0.861691	0.885562
0.791672	0.747365	1.61396
0.814371	0.578517	0.695176
0.767877	0.505395	0.810293
0.857883	0.540442	0.823848
1.16305	0.505817	0.695073
1.69016	0.828567	1.22423
0.859545	0.668894	0.968978
1.50576	0.827472	1.18474
1.51327	0.703386	1.5527
0.850486	0.658741	0.760623
1.6061	0.756876	1.5481
0.879058	0.779895	1.18662
1.53919	0.832345	0.955734
1.04029	0.603741	1.11668
1.61256	0.707289	0.83518
0.707421	0.590023	1.05309
0.765801	0.705943	1.15993
1.10334	0.524972	1.03121
1.14802	0.483832	0.839343
0.735816	0.441776	1.46167
0.81504	0.50462	1.19564
1.01717	1.03077	0.672363
0.795511	1.12088	0.643387
0.653795	0.715501	0.771793
1.30033	0.540693	0.538003
0.742783	0.831625	0.687414
0.825737	1.01287	1.44509
0.80301	2.01606	0.991108
1.07169	1.07998	1.32834
1.09946	0.925255	1.88316
1.4964	1.22568	1.4647
1.88599	0.923456	1.10353
0.725283	0.841808	0.859311
1.18392	0.648581	1.31656
0.706298	0.82981	1.7317
1.31842	0.623725	0.59662
0.795676	0.626251	0.846098
0.629977	0.643857	0.998545
1.02352	0.71001	1.59974
0.959026	0.905991	0.673814
1.23648	0.806401	0.747587
1.26299	1.19073	0.749453
1.63153	1.13384	1.12686
1.3524	1.04002	0.696865
0.996846	1.11571	1.10907
0.855372	1.42076	0.652498
1.26543	1.0666	0.769749
0.774973	1.1248	0.79142
0.763736	1.12702	1.30048
1.03709	0.821144	0.944298
1.02365	0.728109	1.34311
1.60576	0.89878	0.578903
1.30157	1.38608	0.729025
0.942894	0.853987	1.64641
1.42882	0.832204	0.774992
0.874252	1.16591	0.952564
0.828353	0.771917	2.2739
0.855742	0.631609	0.82004
0.722614	0.726075	1.79733
1.00262	0.6665	0.572919
1.32708	0.556774	1.09517
0.770075	0.780153	0.669148
0.682629	0.807551	0.669401
1.22444	0.720874	1.41832
0.679936	0.815747	1.05239
0.685993	0.912796	0.840277
0.993747	0.847542	0.793391
1.26928	0.524495	1.07798
1.05183	0.673367	1.4868
0.979858	1.03219	0.67774
1.27083	0.999245	0.911604
0.865345	0.880259	0.960296
0.898396	0.616521	2.3646
0.875483	0.647627	1.16787
1.01233	0.676754	1.91061
0.9418	0.473531	1.80103
	0.607988	1.57654
1.07135	0.618899	1.30923
0.847909	0.591352	1.16686
0.509603	0.913883	2.03312
0.457301	0.633416	1.48468
0.88589	0.806011	0.943971
1.11229	0.966795	0.781124
2.08152	0.719482	1.3115
2.11422	0.736118	1.57169
0.978143	0.982938	1.02282
1.47274	1.40813	1.23856
0.712779	1.01707	1.55684
1.70161	1.38573	1.04008
0.88395	0.954429	0.888761
1.01573	0.988178	0.351942
0.567606	2.3721	1.09738
0.559331	1.1053	0.819581
0.604085	1.44993	0.510775
0.58716	1.08216	1.14493
0.754467	1.23054	1.45786
1.0191	1.55787	0.42967
0.827925	0.933624	0.810367
0.644099	0.917387	1.18335
0.488931	0.713225	0.844705
0.461845	1.05289	0.948563
0.833549	0.796437	0.637047
0.935892	1.29711	0.319263
0.988045	0.856763	0.746416
1.00044	0.613471	0.632484
1.23065	1.14544	1.11879
0.996711	0.851054	1.48356
1.01524	0.721422
1.01633	1.35535
1.52593	0.722306
0.927859	0.615466
1.33015	0.563829
0.861847	1.29064
0.868941	1.18177
0.528655	0.862301
0.603538	1.01288
0.897231	1.01422
1.37215	1.02923
1.13262	1.13884
0.62726	0.871022
0.617256	0.854566
0.978199	0.698584
1.00363	0.628019
0.93547	0.69059
0.758613	0.594763
0.871757	0.738958
0.945059	0.437943
0.705787	0.583156
1.06088	0.712521
1.90539	0.57668
0.975508	0.652594
1.00787	0.709667
0.905702	0.462753
0.919115	0.556618
0.536892	0.686867
0.762437	0.542992
0.984275	0.475564
1.36235	0.530924
0.968156	0.710433
1.34246	0.813972
1.53544	0.953084
0.767764	0.831876
0.928173	0.732763
0.574435	0.495048
0.985957	0.860221
0.69375	0.717214
0.911248	0.677771
1.48849	0.715971
0.980161	0.564306
1.12871	1.36161
1.11296	0.595552
1.40161	0.537721
1.4264	0.515046
1.12742	1.38777
0.782382	0.935681
0.753764	0.850248
0.701509	0.877662
0.844953	0.657036
1.24661	0.586793
1.20027	0.484058
1.0549	0.625258
1.18992	0.559715
1.60884	0.936995
0.695134	0.90384
0.983118	0.603781
1.63813	0.668174
1.29252	0.687462
1.31205	0.933906
1.62983	0.902581
1.0689	0.513146
1.05479	0.78982
1.17861	1.12997
0.952803	1.19965
0.933265	1.02792
0.906304	0.391023
1.17121	0.619017
0.712647	0.77169
0.507624	0.734437
1.14123	1.08533
1.1492	0.732755
1.75208	0.596921
1.03708	0.503682
0.933171	0.504503
0.926022	0.628606
0.925208	0.514734
0.754991	0.637569
1.15527	0.709392
0.914462	0.936542
1.06208	1.31818
0.967311	0.695956
1.14081	0.742634
1.14587	0.725771
0.591462	0.834261
0.492372	0.675346
1.086	0.587293
1.69967	0.438483
1.88051	0.400283
1.40894	0.730933
0.741672	0.467422
0.579065	0.775515
1.64031	0.668237
0.895018	0.7844
0.851719	0.807481
0.548295	0.692076
0.746865	0.585197
0.758566	0.521687
0.843749	0.490386
1.02061	0.284198
1.00494	0.52017
1.98859	0.462002
1.29073	0.388137
1.0574	0.361708
0.887157	1.38674
0.988429	0.864757
1.33981	0.388239
1.30739	0.68621
0.556258	0.673876
1.06063	0.593323
1.0562	0.296634
0.934007	0.386541
0.946201	0.522516
1.09775	0.321819
1.05784	0.485333
0.819635	0.495728
0.880431	0.682675
0.737737	0.738825
0.81861	1.04019
0.522829	0.377461
0.870748	0.637592
1.48891	0.446211
0.79122	0.274594
1.06802	0.398774
0.827926	0.423529
1.11914	0.506459
0.82784	0.627471
0.819972	0.820253
1.18425	0.49482
0.660626	0.645367
0.474415	0.560442
0.679788	0.31058
0.917848	0.464403
2.2057	0.432711
0.976141	0.532066
0.924192	0.433516
1.26355	0.433868
0.748218	0.469424
0.708266	0.579526
0.618985	0.444733
0.788225	0.71482
0.922924	0.725763
0.845281	0.691599
0.883606	0.64266
1.66727	0.613103
1.16517	0.55833
0.878155	0.660118
1.4845	0.558416
1.1571	0.443536
1.57224	0.497621
1.47519	0.740623
1.59724	1.02522
1.10953	0.637975
1.21049	0.577211
0.706295	0.313169
1.00657	0.441432
1.15473	0.410201
1.08718	0.348451
0.743533	0.404233
0.832298	0.391992
1.07709	0.483401
1.53566	0.932466
1.65758	0.718418
1.32208	0.770094
0.82468	0.56192
1.25447	0.801474
1.14166	0.997752
0.88955	0.853861
0.817109	0.879781
1.11144	0.901548
2.0719	0.848832
0.887658	1.08228
1.07377	1.10946
0.920656	0.977588
0.606533	0.966067
0.566066	0.812158
0.538198	0.661048
0.598438	0.517119
0.960115	0.527858
0.531597	0.816146
0.997673	0.606588
0.739513	0.950182
0.561819	0.610773
0.675518	0.566363
1.13425	0.776664
1.62425	0.526067
1.48914	0.417881
1.56153	1.09606
1.25012	0.961382
1.15863	0.996265
0.652852	0.677942
0.527717	0.657904
0.663192	0.571963
0.702909	0.601739
0.810547	0.465647
0.852368	0.740498
1.16714	0.605031
1.39673	0.6768
0.851687	0.959098
1.00271	0.662495
1.76947	0.603084
1.72067	0.525934
1.79065	1.10998
1.33295
0.906695	0.726952
1.38647	1.06725
1.11222	1.17533
1.21394	1.23407
1.23501	0.617434
0.898584	0.679237
0.864733	0.672704
1.38902	0.644988
0.625782	0.893591
0.90883	0.562624
0.551956	0.63204
0.456605	0.583778
1.38906	0.464691
0.678357	0.441255
0.5728	0.546921
0.573425	0.753409
0.628199	0.805449
0.679444	0.88331
1.5829	0.599762
0.831359	0.414146
0.875605	0.619834
1.31532	0.454351
0.717151	0.534359
0.511058	0.658898
1.05154	0.688984
0.734327	0.49688
0.958535	0.669341
1.68976	0.568964
1.63268	0.61256
0.965559	0.881947
1.42694	0.464824
1.30492	0.879829
0.984237	0.698821
0.786527	0.915633
0.988679	0.578681
1.24484	0.569275
0.958535	0.403673
0.924027	0.589452
1.02668	0.787376
1.08959	0.905471
0.938215	0.774251
0.98853	0.604753
1.023	0.341855
0.805001	0.560949
0.750838	0.585362
0.669949	0.659637
0.774834	0.628484
0.876317	0.750904
0.723401	0.492731
0.760583	0.54421
0.476495	0.535485
0.614394	1.00343
0.798282	1.1062
0.798955	0.596487
0.914532	0.41262
0.915072	0.406353
0.744863	0.451402
0.970564	0.599953
0.863654	0.695175
0.646774	0.606693
0.764619	0.651964
1.51755	0.463001
1.23528	0.384237
1.24976	0.686436
0.854612	0.374105
1.3054	0.447328
0.854503	0.562816
0.86575	0.939572
0.722579	0.577259
0.643348	0.646098
0.384265	0.508005
0.933476	0.900686
0.963807	0.947023
1.12354	0.891339
0.850733	0.570163
0.615583	0.55772
0.917457	0.649816
1.14437	0.859504
0.655745	0.660749
1.16372	1.33529
	0.732684
0.527278	0.605212
0.528211	0.616827
0.760164	0.355676
0.790295	0.599894
0.626426	0.672555
0.714168	0.432337
0.854289	0.584651
1.19785	0.785273
1.20468	0.454884
0.494435	0.415271
0.714878	1.11123
1.04992	0.768948
0.967717	0.739751
0.766074	0.958666
0.653357	-0.00236933
0.438632	0.470275
0.718359	1.29018
0.635655	0.132775
1.14357	0.00545211
0.551942	1.33378
0.756742	-0.00112538
0.781169	-0.00116933
0.885131	0.428264
0.948016	0.100555
0.539425	0.296629
0.845224	1.32153
0.916433	0.759808
0.916167	0.464661
0.756608	0.727441
1.63141	0.542611
0.64435	0.153796
1.06642	0.400458
0.775837	0.00506676
0.907559	0.00220783
0.953423	0.00420714
0.786887	0.88808
0.779955	0.000918907
1.06344	0.00242963
1.18178	-0.000903575
0.63481	0.00392605
0.755053	0.00131857
0.430248	0.614013
0.565305	0.762712
1.31889	0.818412
1.04608	1.06565
1.48464	0.642277
0.666778	0.513695
1.07755	0.6766
0.709797	0.777674
1.12055	0.677193
0.795212	0.64047
1.14773	1.01254
1.03198	0.647165
0.872644	0.775837
0.663045	1.11667
0.726462	0.83601
1.39169	0.706554
0.727396	0.705013
1.24967	0.584207
0.797539	0.670379
0.855089	0.426087
0.838824	0.391556
0.690983	0.516583
0.567911	0.746728
1.05264	0.598843
0.885546	0.764149
1.01792	0.828736
0.826573	0.66703
2.31212	0.619641
0.638884	0.734698
0.784324	0.497013
1.0926	0.511161
1.09088	0.46309
0.744742	1.1154
1.31074	0.599391
0.599243	0.623122
0.563468	0.789332
0.918714	0.846364
0.604309	0.728714
0.730803	0.60696
0.803701	0.687769
1.81506	0.565734
1.05531	0.722167
1.47217	0.646616
1.00523	0.689176
1.21262	0.484644
0.744283	0.695946
0.754712	0.515264
1.35435	0.964356
1.59856	0.5628
0.783377	0.666082
2.02244	0.530121
1.39331	0.444366
0.94403	0.971865
1.25236	0.903427
1.02183	0.63241
0.829002	1.07181
1.31654	0.553838
1.34964	1.01724
1.24539	0.680599
0.841476	0.764726
0.723514	0.728255
1.32077	0.586547
0.848852	0.528092
0.746609	0.854275
0.648987	0.641121
0.614352	0.783273
0.772488	0.924506
0.891738	1.07515
0.871058	0.75643
0.916581	0.453373
0.921011	0.974932
1.35905	1.35339
0.692228	1.10716
1.32579	0.516671
0.731084	0.718182
0.607642	1.10347
1.27772	1.29137
1.12599	1.09597
1.31291	0.7235
0.707412	0.727499
1.5708	0.914803
2.43476	0.808945
0.696687	0.762978
1.04423	0.778562
1.66685	0.543795
1.74207	0.95003
1.78012	0.947586
0.97194	1.8816
0.511754	1.27061
1.22007	0.810827
0.956489	0.581555
0.691932	0.804783
1.3613	0.717737
1.33117	0.83992
0.674644	0.507086
1.16194	0.790191
0.699724	0.53347
0.964829	0.629744
0.78274	0.395095
0.789154	1.52893
2.01147	0.615212
1.11224	0.321605
0.581851	0.418545
0.704983	0.348373
0.756623	0.759172
1.19469	0.694539
0.746372	0.717293
1.12221	0.408917
0.638114	0.690673
1.00948	0.614767
0.899012	0.445299
0.55695	0.490244
0.743839	0.488199
0.659816	0.762475
1.07898	1.42875
1.35238	0.946372
0.685384	0.626174
0.858142	0.815864
1.08534	0.780414
0.991997	0.680081
1.02519	0.4886
0.790368	0.82124
1.60626	0.615597
0.819833	0.647062
1.05929	0.702731
1.1174	0.740684
0.738447	0.526374
1.40413	0.807331
0.776429	0.887177
0.849609	0.705575
0.829062	1.03056
0.653772	0.817122
1.32154	0.555336
1.1	0.447299
1.16558	0.49537
0.7183	0.415227
1.008	0.566904
1.16487	0.783037
1.20678	0.402636
0.949927	0.575779
1.39139	0.466616
1.3194	0.763497
1.18432	0.603569
1.3913	0.63878
0.780058	0.723426
1.06042	0.535144
0.908863	0.64918
1.35062	0.54307
1.27002	0.924492
0.649935	0.572045
0.88688	0.757483
0.714152	0.854261
0.534107	0.611583
0.810249	0.70562
0.813597	0.616353
0.983628	0.449017
0.95329	0.561246
1.07138	0.71279
0.83955	0.639358
1.1	1.28205
1.12334	1.29608
2.19017	0.554802
0.825655	0.438648
1.03436	0.629729
1.07527	0.912789
0.603138	0.903842
0.920966
0.898909
1.89184
0.833358
0.86694
0.61773
0.517857
0.964033
1.27384
1.23968
1.05358
0.72901
0.552727
0.636485
0.947557
1.05328
1.02835
0.711841
0.917351
0.823492
0.582044
0.686184
0.641062
0.787806
1.15249
0.550683
1.21585
1.08141
1.13933
1.1531
1.26013
0.771408
0.851608
0.503561
1.07993
1.12082
0.726388
0.859059
0.994071
1.17384
1.04546
0.895012
0.844453
0.728536
0.585659
1.04832
1.59259
1.20457
0.670955
0.717723
0.706123
0.604309
0.945675
0.605346
0.76557
0.794472
0.808041
1.01582
1.34753
0.873607
0.84629
1.41188
1.29458
1.38586
0.87294
1.0779
0.756978
1.02999
0.776873
0.950015
1.10477
0.863296
1.2014
0.930995
0.674599
1.02241
0.639639
0.803982
0.765674
0.306554
0.504761
0.645505
0.781614
0.69639
0.692317
1.14705
1.81657
1.37838
1.3068
1.16938
0.777792
0.994975
1.29839
0.920462
0.911351
0.734892
0.978191
1.10777
0.91661
0.915811
0.477089
1.73336
0.92578
0.754919
0.921721
0.684895
1.35912
1.51579
0.922758
0.841357
0.647284
0.674585
1.39462
1.39573
1.03811
1.37674
1.55732
1.85313
1.89879
0.669623
0.681266
0.895145
1.06884
0.875355
0.757201
0.933735
1.0678
1.6326
0.787258
0.822218
1.09414
1.00001
1.1849
2.35659
0.740565
1.66783
0.554239
1.01601
1.03238
1.23989
1.31694
0.9692
1.06232
0.724018
0.851001
0.94366
1.10429
1.63281
1.53056
1.15165
1.22908
1.33424
1.02677
0.518701
0.841224
0.83001
0.977732
1.13922
1.14031
1.39976
0.95212
0.728478
0.95403
1.23631
0.652053
1.39797
0.951452
1.25324
1.05333
0.773911
0.775526
1.27694
0.782695
0.75726
0.955319
2.13498
1.39771
1.51988
1.10922
0.760682
0.9576
0.644751
0.718375
1.16111
0.966977
1.72773
1.05399
1.02405
1.25396
1.03962
0.95009
0.844512
1.21346
1.29651
0.942905
1.29913
1.0401
0.617968
1.11828
1.15084
1.03029
0.988072
1.43688
0.823122
1.20752
1.44912
0.780443
0.552106
1.06642
0.854971
1.38582
0.975614
1.1832
1.11544
1.36748
1.10793
0.57957
0.633344
0.495651
0.83398
1.96449
2.52228
2.82371
1.77123
0.880392
1.61111
1.94114
1.73499
1.00597
0.924936
1.16461
1.1098
1.21259
0.658586
1.68362
1.10375
0.736877
0.577659
0.743913
0.644247
1.03845
0.874376
0.910952
1.21567
1.1611
1.04903
0.75643
1.04896
0.484674
0.544491
1.19142
1.40745
1.05583
0.943186
1.01084
1.481
1.27537
0.72544
0.885236
1.16062
0.949349
1.14153
1.42571
1.17228
0.629522
0.554801
1.04611
0.991968
0.860111
0.716493
0.719188
0.898241
0.999196
0.861697
1.04979
0.845579
0.69365
0.485088
0.683059
0.948356
0.534818
0.949631
1.20557
0.888109
0.824692
0.6193
0.550758
2.14595
1.29291
0.479
0.448336
0.968858
0.855015
1.36432

## Sheet: Fig. 10 E
norm synaptic Pra1 intensity
Pclowt/wt	Pclogt/gt	Pclowt/wt + Pclo-Znf1	Pclogt/gt +Pclo-Znf1
1.27841	1.22395	0.220034	1.17968
0.857653	1.04663	-0.054683	0.861653
1.49223	1.07932	-0.107498	0.757432
1.45573	0.512057	-0.147657	0.472964
1.64664	0.516245	0.261707	0.376853
1.08224	0.394763	0.54823	1.34159
1.37285	0.478665	0.538651	0.745225
0.761341	0.293445	4.70095	0.913619
1.30943	0.70091	0.82063	1.00196
1.11763	0.247693	0.54545	4.09459
2.66703	0.782696	2.43074	0.626246
3.54701	0.134152	1.62346	0.881371
1.135	0.158582	0.00891642	0.435633
0.812703	0.117016	0.381737	0.988004
1.02538	0.113215	0.48375	1.28837
1.07076	0.180369	1.06566	1.81647
1.17671	0.20571	0.120185	1.5748
1.75696	0.860557	1.3987	4.52047
6.11786	0.312992	-0.130397	7.23534
1.6248	0.338039	-0.00485109	9.70131
1.42583	0.418095	0.278659	0.642316
8.88085	0.276294	2.75526	0.837673
0.86269	0.516816	0.506696	1.18883
0.378122	0.281439	0.0674323	1.44434
0.332291	0.282629	0.611491	4.15754
1.06662	0.110171	0.328444	0.453928
0.930091	0.395658	2.17676	0.948386
0.844936	0.306162	0.398317	0.696769
1.20512	0.395211	0.412733	4.51696
1.00262	1.44819	0.515271	1.66839
0.510745	0.960731	-0.161409	0.597923
1.77625	0.573972	0.761264	0.565922
0.87193	0.277993	0.341886	2.20249
0.925146	0.240568	3.26424	1.0214
1.14087	0.722325	0.49625	0.420984
1.79691	0.802937	1.7942	6.0345
0.96152	0.708017	1.02719	0.595853
0.941494	0.580911	1.01192	0.750315
1.65476	0.650119	1.01439	0.448814
1.23686	0.388041	0.36647	0.760692
1.03828	0.408252	1.20706	1.24903
0.278288	0.377874	0.751359	0.430596
0.581096	0.187754	0.620467	0.11405
1.7327	0.465253	0.49676	0.6917
1.99679	0.138541	1.15779	1.06696
0.660071	0.278272	1.23996	0.635811
0.646365	1.22763	1.69903	0.423781
0.79226	1.78868	10.3	2.38571
1.38172	0.212447	0.537521	1.24905
0.57436	0.173276	3.843	0.631253
0.74626	0.237695	0.530089	0.252266
0.501304	0.449707	0.285302	0.596594
2.08037	0.294619	1.94051	0.346985
0.62087	0.195419	0.623588	0.19202
1.12536	0.148044	0.513618	0.359332
0.836128	0.792539	1.75282	0.797793
1.25226	1.29335	1.99212	0.695022
1.00689	0.221115	1.64885	0.615632
1.04147	0.156944	1.08139	1.09651
1.13832	0.406491	2.39566	0.747357
1.0241	0.174265	1.44907	1.72343
0.872811	0.241141	0.572643	0.880675
0.989395	0.146128	1.2846	1.38233
0.988066	0.148213	1.93746	0.963111
0.563497	0.434026	1.16881	0.15135
0.99803	0.463971	0.561101	0.559602
1.59231	0.523863	1.40023	0.815005
1.00364	0.462658	1.19996	1.27311
0.775125	0.257581	5.51492	0.32475
0.556558	0.22314	2.56877	0.266991
0.63989	0.226956	0.99882	0.36732
1.02547	2.37164	1.44763	0.811482
0.502925	0.522781	1.31796	0.244555
1.0303	0.221903	1.60076	0.556713
0.540875	0.38319	2.34399	0.462132
0.969801	0.171592	1.79227	1.12919
0.49968	0.37293	1.96294	1.87642
0.623109	0.676635	1.50524	0.955478
3.33124	1.85647	2.05277	0.8617
0.810169	4.77401	1.62669	3.48288
0.502987	0.106694	0.817354	1.61994
0.55676	0.71239	0.459506	1.79655
0.552988	0.226524	0.525701	2.94637
0.429467	0.350771	0.505443	1.39585
0.329201	0.605309	1.32065	2.94606
0.254012	0.803756	0.786636	1.27089
1.74812	0.754187	1.1668	2.46343
1.29265	0.686724	2.05181	0.823287
0.834134	0.555755	1.75444	0.947691
0.365729	0.457929	1.7573	3.61495
0.649501	2.06713	1.99662	1.74559
0.432929	0.817725	1.08302	1.02823
3.55356	0.438939	0.574266	0.618798
5.66044	0.276572	1.88489	0.956018
0.478696	0.703443	1.4996	1.25829
0.575332	0.386419	0.570311	0.735553
0.332847	0.520757	1.20158	1.2093
0.544563	0.269294	1.14217	1.50219
0.558397	0.24607	0.859646	2.56026
0.792585	4.55814	0.398827	1.86998
0.783298	0.324148	1.53124	12.2394
1.00993	0.387793	0.818977	1.42946
0.767213	0.304693	1.05173	0.804962
0.676063	0.295773	1.50686	0.977975
0.549158	0.00843664	1.96456	1.24024
0.304138	0.0495697	1.66686	1.6293
0.281231	0.275444	1.31958	1.44797
0.959495	0.00828204	2.50815	0.526103
0.976694	0.0101372	1.66558	2.0215
0.185993	0.0099666	1.06706	2.09698
0.151304	0.493917	1.23546	2.23121
0.0221423	0.0239505	3.86856	1.04213
0.420351	0.253518	1.29477	1.22287
0.798643	0.00488308	1.86426	1.01769
0.684917	0.0503426	0.730655	0.404543
0.960778	0.124526	1.63222	1.1243
0.955138	0.278257	1.41534	2.14116
0.502662	0.655064	1.29134	3.99672
0.374504	0.0783254	2.17062	9.66492
0.557733	0.381907	0.686462	0.580061
0.602904	0.00607293	0.911008	0.565768
1.40437	9.28e-05	5.78078	0.920479
0.611799	0.17442	0.79498	1.13911
0.239379	0.00771057	7.67851	0.238127
0.688053	0.0323413	0.81533	0.657597
0.380346	0.210176	0.41893	0.649903
0.129084	0.0414571	0.891091	1.1282
0.407124	0.00533087	14.2421	0.779157
0.668321	0.179133	0.556559	0.7379
1.55918	-0.000205772	0.850267	0.665926
1.14555	0.206823	0.879068	0.517867
0.542312	0.191201	1.27232	0.92306
1.27386	0.638898	0.403014	1.08291
0.776808	0.132886	1.33399	1.58787
0.57425	0.136548	3.79244	6.10994
1.67654	3.59582	1.32337	1.38746
2.04726	0.125763	1.18654	0.610624
0.396941	0.21475	1.14869	1.05871
1.40849	0.271411	4.21368	0.525701
1.56521	0.178608	1.35344	0.99094
0.574961	0.258973	1.54771	0.365126
0.9747	2.40535	0.991093	1.56893
0.58533	0.6298	1.19677	0.377441
0.978872	0.34991	0.413768	1.06434
1.56147	0.365543	1.91167	0.716979
1.07617	0.356937	0.871389	2.99008
0.93026	0.452645	2.02191	2.94655
0.526334	0.300939	0.656794	1.6276
0.839512	0.320208	2.16758	0.746971
0.639797	0.300028	7.56043	0.459259
0.909787	0.222754	1.38355	3.98924
0.691653	0.213684	0.762747	3.41459
1.23019	0.479083	2.30898	0.264612
0.975457	0.333991	1.28038	0.620421
2.00654	0.0975166	0.810755	0.861964
0.70043	0.359081	0.51694	0.382741
1.06482	1.09661	0.732369	0.691777
1.62734	0.415655	1.1136	2.04855
2.23163	0.175271	2.20485	0.4901
0.424909	0.219632	1.31453	0.609435
0.570913	0.330731	1.19585	3.34331
0.257736	0.324226	4.17406	3.26013
1.12755	0.0996031	1.41614	1.51253
1.07308	0.204212	2.10576	0.953577
0.941139	0.11711	0.672247	1.04289
0.940768	0.0900843	1.02778	0.282474
1.24529	0.29944	1.62983	0.94171
1.181	0.567853	1.81639	0.484631
1.82243	0.395009	1.23894	0.170078
1.63276	0.345224	1.78017	2.79355
1.39947	0.435571	0.747543	4.39891
1.66772	0.24111	0.974669	0.205741
0.580076	0.31639	1.39878	0.146019
0.802706	0.584588	1.82126	0.780733
0.78509	0.416812	2.01022	2.64111
1.35735	1.25415	2.91234	1.19262
1.0964	0.973386	1.93719	0.578917
0.455226	0.232179	1.77088	0.590104
0.904425	0.382293	1.69103
1.11976	0.419652	1.30537	0.926327
0.663099	0.789788	0.531295	1.62365
2.32479	0.972506	1.49589	2.2737
0.219292	0.237742	1.05613	1.25795
1.23823	0.542235	0.98822	0.535948
0.261738	0.39963	1.66263	0.834439
0.426424	0.347032	2.65377	1.12423
0.970914	3.04398	1.12196	1.35378
0.092077	0.246936	0.288068	0.898635
0.189455	0.338339	0.867449	2.38679
1.22357	0.333017	0.641266	0.985317
0.662018	0.247074	0.945851	2.24299
0.583321	0.227049	1.83589	1.28853
1.0306	0.465887	0.269016	0.712011
0.751174	0.389277	0.794486	0.873217
0.542142	0.41825	1.17426	0.209046
0.61271	0.229644	1.60266	1.51823
0.372111	0.81757	1.0389	1.54263
0.380887	0.281779	0.294481	0.490571
0.52343	0.332507	0.836159	1.0234
0.849757	0.516229	0.446079	0.973726
0.261738	0.58774	0.970497	0.918275
0.426424	0.725045	0.961736	1.82753
0.970914	0.521638	0.717551	1.66947
0.092077	0.421772	1.11092	0.41586
0.189455	0.652901	1.59719	1.04987
1.22357	0.488737	0.444549	0.465745
0.662018	0.256643	2.8508	1.0692
0.583321	9.25386	2.10775	1.85031
1.0306	1.74676	0.995962	1.75347
0.751174	0.219772	0.113371	1.76656
0.542142	0.112783	0.535776	2.51415
0.61271	0.11986	0.399136	1.66097
0.372111	0.446619	0.591712	2.65885
0.380887	0.20134	0.661415	4.82869
0.52343	0.104872	0.598402	1.07139
0.849757	0.178824	0.750325	0.288101
0.865703	0.213359	0.704077	2.37863
1.14379	0.446263	0.249609	0.427325
2.51758	0.227281	0.397251	0.831108
3.19114	0.165133	0.708496	1.25173
0.94151	0.12363	0.773007	1.65927
0.608152	0.19236	0.428556	1.65714
0.686942	0.0634459	0.887305	2.53052
1.27233	0.0860979	1.15745	0.365827
1.14971	0.259837	1.49246	1.76945
0.855567	0.112486	1.913	0.689417
0.77769	1.12162	2.42329	1.83385
0.725756	0.09625	1.41908	1.99894
0.4846	0.120942	1.2501	1.1998
0.784303	0.13627	1.00036	0.646235
1.47302	0.117619	8.74224	0.6573
0.816628	0.442757	1.13132	0.456998
0.879347	0.894999	0.991959	4.84897
0.4988	1.59924	0.83483	1.67906
1.02427	0.150964	1.36898	1.29024
0.724644	0.173245	1.24379	1.30703
0.726776	0.258384	1.10062	1.45148
0.853666	0.105319	0.867	1.08551
0.561348	0.440545	1.51744	2.47908
0.494148	0.164932	1.34823	0.283527
0.407171	0.16898	1.12579	1.74603
0.748083	0.743324	2.0111	0.406839
	0.531727	1.3664	0.771929
0.424774	0.456168	6.02809	1.89255
0.509413	0.164808	1.65858	1.57766
0.867969	0.168161	1.47324	0.922682
1.00496	0.108812	0.552262	0.734288
0.259186	0.124681	1.82112	1.24324
0.315604	0.150531	1.19588	0.265635
0.278048	0.32064	0.658679	0.920532
0.361401	0.352486	1.09318	0.731528
0.268985	0.88151	1.81041	0.83973
0.260112	0.904935	1.96997	1.54127
0.707143	0.431538	1.28588	0.98791
0.294339	0.151814	1.05248	0.879309
0.164536	0.469997	0.82372	1.86711
0.109276	0.369129	0.919753	0.988035
0.339966	1.46244	0.84322	0.892479
0.616899	0.278688	1.38783	0.448779
0.184495	0.356759	1.52693	0.550236
0.532196	0.341825	1.28343	2.62414
0.43095	0.301511	1.04945	0.77785
0.289682	0.183444	1.37829	0.597571
0.231282	2.53733	0.923863	1.59903
0.198067	0.348964	0.966464	0.55188
0.105356	0.0689772	5.027	0.616687
0.332908	0.485511	1.06075	0.423425
0.436851	0.437193	2.24802	0.990733
0.403784	0.547643	2.40316	0.960216
0.341864	0.373594	1.12015	0.70554
0.659618	0.45433	5.38027	0.760231
0.372487	0.476611	1.35568	1.1912
0.612915	0.885079	2.28885	0.889571
1.06658	0.417436	1.86251	1.09504
0.857516	0.173632	1.97114	0.651698
3.25316	0.558212	1.01852	0.896083
3.85893	0.398038	1.69366	1.59606
0.0737848	0.713673	1.44895	0.692747
0.426461	0.268476	0.825121	0.668026
0.281334	0.56393	0.660672	1.71948
0.227487	0.17184	0.490717	2.26409
0.530573	0.126102	2.12047	4.70462
0.717595	0.354912	0.590708	2.46909
0.671736	0.238885	0.645823	2.63879
0.377713	0.847562	0.627699	1.77655
0.964073	0.321351	2.98415	0.819917
1.18134	0.304029	0.643985	0.331496
0.289808	0.373934	0.671659	1.13748
0.430635	0.135219	1.26271	0.811341
0.449433	0.405857	0.987618	1.84298
0.217815	0.301849	0.731303	1.02993
0.471857	0.629352	17.042	0.80603
0.135642	0.115656	0.871265	2.25134
0.226793	0.0495387	0.234389	5.61813
0.308966	0.108502	0.947381	1.13127
2.27326	0.397538	0.78336	0.593905
4.02256	0.23275		1.02313
1.22714	0.395272	0.436028	1.52636
0.508656	0.496976	0.494851	1.53743
0.629376	0.186003	0.633505	2.33077
0.788389	0.664629	0.412656	1.36864
0.336533	0.0418591	0.893092	1.77339
0.667374	0.207069	0.3465	1.00941
0.358071	0.446341	0.485324	4.57239
0.609544	0.303937	0.373646	1.52573
0.682106	0.37656	0.49797	1.25896
0.780276	0.615878	0.914103	2.63911
0.287659	0.110558	0.55639	1.37374
0.481763	0.414433	0.332422	3.52556
0.418706	0.493051	0.238363	0.920721
0.373141	0.138741	0.407283	2.39826
0.234317	0.307135	0.554831	0.629059
0.876991	0.270362	0.600965	6.90538
0.625603	0.438297	0.560037	1.54249
0.736102	0.304833	0.0737644	0.957161
0.872817	0.329587	0.4084	0.741075
0.532977	0.297401	0.33295	0.471541
0.698461	0.514437	0.56988	2.46319
1.1959	0.138541	0.712813	2.46049
1.37561	0.317009	0.78074	0.562819
0.886644	0.270592	0.572409	0.711821
0.284435	0.606622	0.524019	0.879855
0.763372	0.332987	0.72177	0.170731
0.851384	0.14927	1.32307	2.96514
0.332171	0.609435	1.34288	1.47852
0.840151	0.308665	1.1817	2.14314
0.209069	0.250273	1.17919	1.79329
0.898804	0.633771	1.52784
2.90752	0.236443	1.04045	2.98162
1.55419	1.50465	0.97577	0.803908
0.916128	0.751746	1.09434	1.14469
1.45479	1.2505	0.839117	0.557441
0.434829	0.390668	0.579259	1.67838
0.64278	0.461113	0.35725	2.22123
0.355669	0.666452	1.09398	1.025
0.355289	0.592793	0.89286	2.37491
0.537655	0.744638	0.630071	4.88571
0.98104	0.527927	0.601261	2.31128
0.0744596	1.34316	1.69398	0.259183
0.771824	0.549791	0.815808	0.315598
0.570891	0.940041	0.46739	4.93911
0.560396	2.59247	0.584169	10.6744
0.289597	1.41611	0.422626	-0.0418243
0.797156	0.0891098	0.198236	10.8485
0.707566	0.00237864	0.755826	2.14207
0.603052	0.0967436	0.767144	2.06772
0.52364	0.045644	0.612029	0.442195
0.683728	0.0322624	0.684402	1.83418
0.780929	0.0612507	1.10218	0.737493
0.399401	1.21511	0.893598	0.513689
0.268312	1.65668	0.681895	1.02317
0.25183	0.0642637	0.647183	2.93237
0.57909	0.0689922	0.345341	3.99448
0.713276	0.056213	1.05889	9.07625
0.471584	0.156001	0.973262	4.75701
0.456136	0.063383	0.212967	6.58089
0.61378	0.112287	0.744847	1.1417
0.399211	0.0270552	1.21375	3.94186
0.35923	0.0289104	0.540562	9.17732
0.245698	0.0250626	0.38667	0.746792
0.318639	0.802675	0.398873	9.15
0.564399	0.363488	0.665834	5.57499
0.728535	2.31621	0.610787	2.96796
0.617468	0.238112	0.848244	0.742011
0.528361	0.0692235	0.110983	3.66334
1.60316	1.07209	0.852016	0.769964
0.755933	0.10861	2.62836	1.38881
1.09537	0.738024	1.21925	1.27649
0.390275	0.055827	0.836652	37.3822
1.6431	0.121157	1.42331	3.33529
1.04523	0.150347	0.847422	1.12198
0.514387	1.01024	0.874926	0.506281
1.84167	0.201307	1.23226	2.64455
2.9972	0.248836	1.20804	1.78622
6.54402	0.283031	0.723476	1.76545
17.6806	0.417524	1.33648	2.16631
11.553	0.445816	1.2029	3.96834
9.6527	0.557702	1.90073	0.525898
2.23783	1.74422	1.80321	0.738087
0.645813	0.365451	0.633779	1.7201
0.409136	0.229506	1.6317	0.474754
0.627266	0.41536	1.5161	8.29288
2.70684	0.124773	0.153008	1.07726
2.32044	0.132608	0.455081	1.1315
1.32075	0.0437132	0.0793282	0.528769
0.769189	1.03516	0.461573	10.8081
1.06098	0.5961	1.49062	1.39205
0.773614	0.161316	0.434427	1.29176
0.109634	0.222398	0.733003	0.816396
0.416724	0.34337	0.864787	2.17351
0.79427	0.127972	0.243042	12.0915
0.219691	0.0591961	0.628364	0.915161
0.24479	0.360583	0.375501	0.292233
0.436745	5.79634		0.501272
0.533335	0.0644801	0.0637359	11.9019
0.675025	0.23592	0.340713	0.971699
0.881438	0.0727931	0.934812	1.29182
0.745859	0.507978	0.772293	0.473546
1.1422	0.502385	0.595429	0.611457
	2.15315	4.79118	2.06936
0.377406	2.67193	2.29697	0.621826
0.338979	0.172071	0.816728	0.528735
0.765778	0.123722	0.457151	0.367424
0.672828	0.435169	3.03803	0.451687
0.169595	0.287944	5.33393	4.33148
0.791052	0.667255	0.587233	1.00746
0.294562	0.475576	0.901552	0.709609
0.408951	0.594569	0.778897	1.18177
0.836642	1.11865	0.215675	0.565061
2.02269	0.475545	0.797497	0.459166
7.35269	0.762098	8.23472	0.257116
3.66544	0.578222	2.69438	1.02778
0.493372	0.247631	0.986936	0.566513
1.9964	0.10963	0.690465	1.08437
0.370418		0.757424	3.31065
0.262195	0.876567	1.00188	0.331343
0.811964	0.40604	0.898837	0.889415
0.548736	0.634434	0.147456	1.02536
0.584202	0.259924	2.22137	0.73765
1.0866	0.617026	0.299851	0.773239
0.282354	0.536896	0.650794	0.823822
0.408583	2.02054	1.5735	12.5587
0.725897	2.53982	0.35166	1.66728
0.548946	2.13701	0.171854	1.13609
0.818532	0.347281	0.430178	0.647449
0.755741	0.389116	0.931169	0.488661
0.300026	0.289597	1.31907	0.937318
0.420844	0.481299	0.913357	5.37098
0.307751	0.154673	0.840269	3.77862
1.28579	0.145084	1.18885	6.63501
0.263702	0.353771	4.16108	0.76154
0.513391	0.41215	1.12523	1.43078
0.566005	0.31868	1.35842	2.4891
17.5605	0.664065	3.1179	6.73894
0.514459	0.696604	0.227428	8.54557
1.23626	0.679091	0.751153	0.44801
0.525896	0.546905	0.702742	0.804836
0.727106	0.644381	3.80153	1.9015
0.536791	0.656669	5.19709	2.02808
0.479657	2.1859	0.951925	0.873967
0.982154	0.99771	0.992645	1.94352
0.740521	0.740485	2.0492	0.363728
0.366425	0.400054	0.449638	0.627201
1.20925	0.606045	0.544497	0.782504
0.625766	0.664193	4.70083	0.621825
1.24649	0.602124	1.33998	0.891919
1.91459	1.14475	3.51823	0.617288
1.26556	0.598836	0.661547
0.447763	0.891975	1.68138
1.18501	5.10221	1.58883
0.625607	0.957857	0.971366
1.1748	0.46661	0.660654
1.58491	1.69092	3.47292
1.05202	0.575844	0.754393
2.07949	0.423195	1.00063
0.59247	0.493734	1.27274
0.700658	0.446756	0.412453
0.447431	1.16686	1.75683
0.780332	0.842552	0.433103
0.708644	0.497042	0.464524
1.25689	0.978805	0.793153
0.461232	0.523429	3.28313
0.189859	0.50737	0.296856
0.153989	0.201966	0.292496
0.243681	0.291895	1.98265
0.306419	0.27339	1.02382
0.51185	0.508423	9.30178
0.29479		0.889519
3.33298	0.454507	1.42367
0.991437	1.24841	0.622841
0.182327	1.26694	0.507628
0.797672	0.390262	0.942028
0.268745	0.00912429	3.70638
0.160417	1.57343	0.388231
0.892759	0.150574	1.37033
0.140293	0.215921	1.61797
0.228987	0.12812	0.911536
0.310727	0.117016	0.364638
0.0706716	0.45202	0.755409
0.332884	0.414906	0.5339
2.30993	0.163115	0.962329
2.46712	1.88087	0.401314
0.786743	0.541327	0.581067
0.932343	0.927229	0.16215
0.247763	0.0664502	0.60149
0.75061	3.9389	0.453561
0.104545	0.541817	2.08313
0.161556	0.433016	1.51579
2.25845	0.350907	1.35157
0.217777	0.39317	0.177493
0.389404	0.190525	0.330748
1.10033	1.31141	1.04677
0.759507	3.06376	0.497925
0.838166	0.0567821	1.02056
1.40722	0.342465	4.83446
0.846433	0.198108	0.795851
0.473352	0.747843	1.21561
5.96034	-0.0147306	1.61754
1.90247	0.0681325	0.576374
5.0699	0.531869	0.321903
0.617043	1.4564	0.271968
0.798829	0.239146	2.08112
1.46243	0.217498	0.553377
0.336054	1.70793	0.331938
0.216989	0.165829	0.196795
1.92558	0.125632	0.66971
0.144952	5.87489	12.6815
0.365584	5.1017	0.592154
0.483248	2.82819	0.917806
0.119204	0.177319	0.419548
0.512935	0.810931	1.05232
0.414678	0.380893	0.185552
0.702182	0.488888	1.87541
1.74447	0.257133	0.713918
0.668501	0.200018	1.35063
0.140258	0.295789	0.495439
0.212015	0.357055	0.426063
3.16668	0.22128	1.08621
0.680289	12.0904	0.40452
0.661547	0.960507	0.352694
0.231877	0.361802	0.294493
0.780385	0.537666	0.51954
1.33746	0.0999213	0.731205
0.17942	0.471513	0.664894
0.176863	1.17834	4.91761
0.507418	0.390946	0.589755
0.548666	1.08966	1.14618
2.82405	0.542535	0.399511
0.395307	0.114336	0.306298
1.29294	6.73572	0.433787
0.745933	1.55665	0.837344
0.557353	0.519416	0.305562
0.346143	13.3104	0.902814
0.399528	3.41526	1.15086
3.69422	0.86083	0.0420708
0.50868	0.707174	0.121412
0.990859	3.85914	0.651705
2.25556	5.91577	0.137684
0.459919	0.765499	0.493548
0.197355	0.329102	0.328839
0.47153	1.12949	0.226027
4.43602	0.796009	0.198757
0.897996	0.487873	0.792262
0.148349	0.210422	0.872129
0.430161	0.208811	1.05927
0.362309	0.654735
1.22184	1.17023
0.387618	3.81584
0.663754	0.232509
0.438691	0.38718
1.04516	1.55149
0.391436	0.421456
0.362834	0.486997
0.589036	3.2402
0.696209	0.165725
0.816746	2.42398
0.81622	0.911326
1.53005	0.338805
0.189929	0.296437
0.574062	2.02987
0.288974	0.769527
0.718908	0.27922
0.253333	0.885386
3.22595	0.120449
0.344146	0.246467
1.43569	9.29086
0.767442	14.181
0.43489	-0.0289161
0.712884	4.13647
0.282529	0.0961736
0.236554	0.133568
2.27693	0.139049
1.01508	0.254524
1.25651	0.759298
2.41312	3.10475
1.69733	1.22153
0.320379	1.36701
0.440599	19.7712
0.621299	28.6233
0.830197	0.079026
0.652896	1.65414
0.276487	-0.0311591
0.453105	0.01522
0.731764	0.129189
0.63855	0.701166
0.160434	0.101008
15.4377	0.0229267
1.34192	0.176724
1.52509	-0.0466414
0.655313	0.0259565
0.492373	0.217725
2.4172	0.156231
0.384973	0.56513
0.231614	0.578914
0.372258	4.96589
1.39107	0.38042
1.3871	0.225835
0.565725	0.163272
0.372134	0.0587798
1.44361	0.212348
0.369297	0.171452
0.317699	0.325091
1.42864	0.428761
3.95206	0.414083
0.783118	0.214994
1.65482	0.520923
0.27689	0.209021
0.194466	0.678555
0.596481	0.25624
2.78375	0.17746
0.240179	0.430599
1.08148	0.198809
0.510588	0.117156
2.57265	0.380175
0.387329	0.740995
0.426781	1.13318
1.37198	1.3431
1.00668	1.89196
1.09978	0.94667
2.0763	0.611439
1.36487	3.25054
0.324231	0.7528
0.709415	0.30649
0.591401	1.77806
3.51611	0.800388
0.495001	0.727736
0.307978	1.64335
0.138979	1.11399
0.390157	1.54124
0.265278	0.320309
0.72418	0.23193
0.348455	0.633524
0.0601974	0.402891
3.60355	0.98818
0.321884	0.032787
0.661863	0.113075
0.65272	0.431247
1.06579	0.860199
0.309993	0.217655
1.61952	0.218688
0.182521	18.1304
1.13844	0.4585
1.15068	0.244925
1.13485	2.33012
1.96755	0.143865
0.474876	0.546634
0.505071	0.24503
5.99819	1.12204
0.341554	-0.0447852
0.384921	0.145932
7.01005	0.517191
0.183012	0.350399
0.563939	0.387058
2.24745	0.577705
0.864229	2.01645
0.382697	0.360383
0.273002	0.196043
0.226465	4.92752
0.218829	0.0742802
0.555409	0.0362555
0.296332	0.477118
0.315756	0.378756
0.578126	2.1449
0.672722	2.22017
0.680377	0.24617
6.31025	0.253175
1.19802	0.814925
0.437342	0.494336
1.19104	0.85985
1.71786	0.551574
1.38597	3.82373
0.736512	1.47451
4.01959	0.391857
0.534007	0.661497
0.651828	0.126947
0.412664	0.682322
0.915232	0.216938
0.390544	0.28775
0.429986	0.801176
0.78254	0.259113
0.313076	0.152431
0.330748	0.0911124
0.392015	0.24109
0.478205	0.50367
1.20708	0.216938
4.85145	0.503461
0.0981351	0.107997
0.555007	21.6351
0.560244	0.153587
0.740259	10.6468
0.271338	0.398565
0.0769595	0.165356
0.256958	0.0405118
1.8629	0.21121
0.405904	0.115965
0.657292	0.314793
0.348561	0.953467
0.291165	0.441213
0.329943	4.92431
0.694056	0.243998
0.342711	0.172766
0.136773	0.679641
0.293774	2.17147
0.361049	0.455033
0.391384	1.02472
0.329015	0.575534
0.328155	0.510642
0.404625	0.0964528
2.09268	0.338805
1.25863	0.496857
0.324181	0.145337
0.865087	0.333672
0.0372718	1.05302
0.453719	0.304055
1.09246	0.46498
0.655015	0.245364
0.180489	0.308101
0.0770996	0.838062
0.13933	0.378861
0.439794	0.17977
0.275314	0.346091
0.969054	2.41561
0.290815	0.397408
0.346862	0.120448
3.46844	0.367651
6.24853	0.27985
0.275436	0.812122
0.229145	0.3401
0.476138	0.243402
0.569981	0.211016
0.513163	0.221928
0.484825	0.210404
4.15121	0.764692
0.49775	0.238638
1.38363	1.49059
0.384762	2.85161
0.816325	0.263684
0.369788	0.112602
0.235642	0.388109
1.12054	0.2437
1.19098	0.292478
0.530363	0.186409
1.01161	0.0983623
0.274053	0.612612
0.37774	1.22246
0.860024	0.13595
2.38948	0.145932
0.810423	0.305806
0.728384	0.257869
0.636117	0.446152
0.55681	2.68355
0.33686	0.160347
0.352588	0.91052
0.625432	0.715616
1.81959	0.343831
0.956583	3.02588
0.587636
0.353062	-0.0511949
0.792225	0.00862496
0.449252	-0.0335458
0.202697	0.077892
2.35659	0.332164
0.71164	0.262446
1.83517	0.547423
0.800545	0.381978
0.296856	0.565576
2.30138	0.605093
0.323408	0.431658
0.493599	0.466187
0.367983	0.395247
0.808408	0.328741
0.746319	0.276671
0.512778	0.0424363
0.317366	0.397131
1.02216	0.182324
0.385989	0.112101
1.40503	0.168284
0.361136	0.684207
1.70539	0.594981
0.380349	0.300105
0.747317	0.366638
0.454752	0.438454
0.803522	0.405227
2.06476	0.518203
0.573396	0.511383
0.755217	0.315339
0.218251	0.512471
0.312059	0.54193
0.595062	0.207642
0.239653	0.705119
3.45008	0.214701
0.203381	1.10119
0.515038	0.490337
0.628148	0.266693
0.956495	0.0566867
2.20927	0.3759
0.478028	0.234235
0.335564	0.408331
0.337491	0.311357
0.568089	0.840707
0.387214	0.732984
0.891779	1.06478
1.93781	0.408942
1.79648	0.624546
0.25391	0.466054
0.433507	0.255812
2.24223	0.655649
1.07605	0.522742
1.43307	0.754296
0.425922	0.343735
1.03074	0.119691
1.36762	0.417302
3.14165	0.164065
0.487626	0.202335
0.30092	0.897714
1.44239	0.978047
0.318873	0.782826
0.19182	0.77152
0.886805	0.612843
0.680621	0.263719
0.242736	0.314542
0.638534	0.399627
0.968318	0.585745
1.46714	1.01236
2.51923	0.487843
0.228094	0.558914
0.25575	0.632933
1.11768	0.985399
2.20507	0.731128
3.75333	0.0297772
17.234	2.53486
0.35406	0.00342435
2.40076	0.312713
2.09007	-0.0326686
0.178597	-0.0128715
0.341309	0.23665
0.602944	0.204247
0.895335	0.0124485
0.717613	0.0660826
0.71439	0.0481423
0.263263	0.164305
0.192346	1.2147
0.272529	1.23651
0.126946	1.09445
0.305579	0.743283
0.19506	1.02192
0.270252	0.924175
0.0869599	0.651166
-0.000648973	0.524654
0.399843	0.801854
0.210228	1.05756
2.59957	1.15143
0.343148	1.03858
0.529837	0.896174
0.163657	0.71056
0.259656	0.934576
0.165076	0.926773
0.715581	1.30833
0.52961	1.24721
5.65592	0.940839
0.731676	0.987284
0.311709	1.19965
0.421527	0.158093
0.0914266	0.956047
0.141694	1.50636
0.12649	1.51029
0.884668	0.755675
0.115789	0.367407
3.26255	0.745459
0.157387	0.847953
0.0892899	0.444823
0.0512652	1.01021
0.160259	1.08476
0.474227	0.963291
0.427972	0.448511
0.266433	0.642911
0.784221	0.722369
0.47267	1.44856
0.222629	1.20355
1.08661	0.852491
0.272651	2.10586
4.75957	0.927491
0.616149	1.22361
0.0521583	0.207801
-0.13602	0.308464
0.041492	0.934523
0.263246	0.94612
1.17452	0.881923
0.195376	1.00841
0.353149	0.803552
0.372223	0.424227
1.0424	0.186889
0.265979	0.305705
0.0668708	0.0958579
0.446082	0.488054
2.87471	0.751403
0.903215	0.951985
0.733726	0.902145
0.95217	0.833754
0.713672	0.330279
1.05673	0.788583
	0.531314
1.01738	0.42444
0.947607	0.211861
1.22001	5.64392
1.12826	1.08083
1.538	0.556101
0.655437	0.801614
0.872687	0.840813
1.30172	0.528022
1.89532	0.422317
0.0178872	0.44546
0.961513	0.301059
0.339941	0.822979
2.12759	0.207351
1.10703	0.111994
0.946891	0.202361
0.896016	0.234738
1.54185	0.221176
2.15129	0.203502
1.12056	0.166905
1.07104	0.743653
0.418204	0.360428
1.06067	0.157961
1.22043	0.694954
0.90196	0.172452
0.637789	0.722103
0.488958	0.239276
0.900367	0.151378
0.7953	0.379456
0.715442	0.0631893
0.778845	0.16709
1.04984	0.260985
0.820882	0.527518
1.15228
0.535508	0.261047
0.536727	1.33999
0.405811	0.449618
0.472316	0.519507
0.63633	0.076043
1.46685	0.800323
0.616372	1.24386
0.223859	0.42831
0.992618	0.446797
0.409686	0.469922
0.50788	0.721039
1.22449	0.438194
1.08991	0.170877
1.50727	0.354389
1.73529	0.409871
1.15785	0.181228
0.45881	0.564452
1.1	1.00304
1.09649	0.986772
1.13696	0.68782
0.769345	0.877088
1.8712	0.703088
1.41602	0.405417
0.795883	0.385044
1.17499	1.14532
1.2781	0.620262
1.13718	0.686187
0.80366	1.41301
1.40262	1.25533
0.949253	1.99413
0.800473	1.12727
0.947554	0.612032
1.17932	0.605645
1.20822	0.278228
0.796917	0.526034
2.19657	0.696607
1.44121	0.903431
0.766849	0.760272
1.48043	0.320026
1.58839	1.01619
0.629587	0.811723
0.669052	0.68353
1.3996	0.422576
0.812285	1.01526
0.726405	1.02008
0.886674	0.786498
1.05568	0.551258
0.850846	1.08317
0.910851	0.980967
1.00902	0.628722
1.00419	0.465166
0.353025	0.166936
0.862709	0.363176
0.715894	0.0717531
	0.0552946
0.769528	0.139335
0.489924	0.281817
1.26481	0.444231
1.33242	0.543215
1.16303	0.403133
0.97078	0.623501
0.711481	0.375811
0.781323	0.86338
0.506499	0.636439
0.503073	0.601657
2.2044	0.627114
0.809554	0.469921
1.30395	0.278624
0.719057	0.635203
0.922384	0.999825
0.518387	0.842376
0.713136	0.300817
1.10345	0.212279
0.677889	0.296458
1.08289	0.326902
0.831654	0.298648
0.603617	0.364855
1.1328	1.70599
0.595994	1.75565
0.859488	0.423624
1.70317	0.230928
1.46581	0.389239
2.05726	0.479294
1.47777	0.524472
0.938446	1.14991
1.66095	0.538505
0.331776	0.641801
0.429592	0.600189
0.58429	0.668587
0.375579	0.322287
0.891224	1.29843
0.764958	0.791418
1.55623	0.613757
1.29514	0.874129
1.01759	0.42619
1.09589	0.797852
0.790368	0.468174
1.14727	0.555943
0.467357	1.29747
0.635227	0.402038
0.981036	0.422389
1.20411	0.549393
0.918934	0.448125
0.820581	0.630029
0.669029	0.200319
0.43943	0.128193
0.632219	0.149244
0.31851	0.0278355
0.399566	0.773374
0.989265	0.759808
0.687307	0.90912
1.01514	0.919843
0.803445	0.844196
0.691106	0.522606
0.815033	0.608978
0.783516	0.35194
0.800836	1.21071
1.17721	0.372316
1.25913	0.580793
1.75942	1.14974
1.44462	0.450596
2.8166	0.735538
0.827108	0.549672
0.657047	0.758291
0.948074	0.644016
0.924086	0.473186
1.19063	0.359423
2.00364	0.473675
1.15751	0.986212
1.21467	0.328186
0.472231	0.609887
1.17028	0.680102
0.335226	0.483746
0.969685
0.660242
0.696469
1.65098
1.76294
0.663156
2.30996
2.25807
0.718382
2.34796
1.4114
1.76886
2.38936
0.994581
1.101
1.84987
1.1945
2.16605
2.11857
2.57299
0.845384
1.7522
0.924506
2.52086
1.36725
1.39156
1.5401
0.711388
2.01541
0.440176
0.838041
1.02286
0.581564
0.533612
1.05608
0.81811
0.540675
0.254731
0.453768
0.850001
0.274615
0.41866
0.968309
1.22085
0.611892
0.441529
0.536409
0.321193
0.705864
0.218806
0.366021
0.44773
0.384064
0.660219
1.15343
0.658704
0.971596
1.17581
1.89002
0.660544
0.716611
0.769388
0.844242
0.37087
0.103086
1.11963
0.783747
0.873406
0.693647
0.387001
0.77813
0.826713

## Sheet: Fig. 10 F
norm synaptic EEA1 intensity
Pclowt/wt	Pclogt/gt	Pclowt/wt + Pclo-Znf1	Pclogt/gt +Pclo-Znf1
0.765577	0.592986	0.393273	1.02818
0.519498	1.24759	-0.0739113	0.793955
0.753083	0.998548	0.451724	1.05063
0.922503	0.686595	0.66054	2.87934
0.541096	0.761982	0.540891	0.705226
0.60887	0.829961	0.255621	1.74336
0.630044	0.722382	0.632586	0.910652
1.00998	2.44626	2.26794	1.0483
1.33061	0.507647	0.421447	3.68092
0.800735	0.506376	2.50726	3.14978
0.626434	0.711802	0.302645	1.53921
1.14742	0.392221	0.498105	0.735928
0.875275	0.694647	3.69767	1.85009
1.13047	1.16098	0.126225	1.00828
2.44584	0.484135	0.364048	1.76031
0.880156	0.303902	0.142314	0.173015
0.465694	0.55359	0.953439	0.540248
2.03943	0.862153	-0.255402	0.578578
1.08982	0.96868	-0.160097	0.497681
1.47694	0.32509	0.239109	0.712211
0.435636	0.321276	0.87529	1.08304
0.434145	0.765592	2.01763	0.705431
0.678748	0.682781	1.34692	1.31323
0.489001	1.54281	0.599342	0.696108
2.79994	0.93057	0.19866	0.657355
2.73174	0.940302	0.453843	1.00659
1.42464	0.563132	0.608022	1.3431
0.696327	0.825519	0.575626	1.86769
1.52269	1.03688	0.96678	1.06504
0.950677	0.905991	3.09855	1.18406
1.80774	2.52843	1.55489	1.30181
0.591291	1.03327	0.248212	0.323176
0.8649	1.25246	1.81664	0.23528
3.14068	0.892445	0.572016	0.978426
1.18872	0.665421	1.52122	0.563117
0.682357	1.31345	0.642757	0.612888
0.555709	0.931622	1.48818	0.704583
1.95916	1.20694	2.0784	0.535806
0.880156	0.991549	0.582187	0.152265
1.21942	0.623702	0.463166	1.38462
0.106103	0.529026	3.65171	-0.227667
1.3645	1.18999	0.626873	1.61524
1.44285	0.153551	1.62286	1.48255
2.22834	0.308358	2.43674	5.85697
0.888631	0.696765	0.861524	1.31388
0.410005	0.733809	0.953219	0.948558
0.426941	0.722586	0.899211	1.09511
1.4331	0.774257	1.14805	1.81156
0.734028	0.921451	3.45285	0.767915
0.464437	1.28084	0.968256	1.80076
0.551895	1.78699	0.392426	0.98414
1.14678	1.75585	0.478831	1.72049
2.01529	1.03517	2.87829	1.64339
2.7186	1.20523	0.861305	0.744608
1.00531	0.759016	0.0406673	2.34842
1.13513	1.3179	0.109698	0.44113
1.28782	1.56335	1.09829	0.671968
1.28592	2.81453	0.380998	4.484
1.50511	1.11734	0.671558	0.736556
1.032	1.11289	0.0741305	3.02272
0.393054	1.10611	0.48583	0.374423
1.40028	0.463371	0.639995	2.679
3.85226	0.471203	8.55058	0.691446
1.629	0.979479	5.39719	0.796278
1.8338	0.522669	0.238889	3.57801
0.222786	0.730214	0.121768	0.171539
1.26029	1.25034	0.506157	0.798616
1.41701	1.2478	0.428636	0.247993
1.11947	2.42487	2.09661	0.127905
0.552523	0.553371	0.275947	0.326142
1.27151	2.08983	0.841183	0.288865
0.891159	1.59554	0.810058	1.51952
1.02055	3.22772	0.787818	0.503819
1.27555	0.727671	1.41574	1.33929
0.66922	1.05761	1.06165	1.18892
0.818943	1.66987	1.75523	1.70122
0.431179	1.18024	2.6089	3.9912
3.62841	0.848387	1.99983	0.425684
0.348587	1.32468	0.29924	2.71458
1.24166	0.755626	0.502547	5.66636
2.38929	0.817671	1.68598	2.45065
0.31999	1.1796	1.79176	0.300307
0.343502	3.98674	6.18459	2.40348
0.691242	0.859186	0.848607	1.34564
1.29058	0.71284	1.91088	1.31282
0.380355	0.968037	0.691037	1.76158
1.12179	0.546809	1.61398	1.95514
1.65357	1.18765	0.467608	1.58559
1.02416	0.403429	0.893716	1.98394
0.7768	0.957866	1.82003	0.0631125
1.0212	0.868728	0.333346	1.72241
0.538977	1.29821	0.219396	1.12794
0.81979	0.687647	3.77792	0.0908621
0.846692	0.549352	1.17156	0.321904
0.818738	0.674729	2.12985	2.26393
1.37677	0.694647	2.29356	1.23997
1.07604	1.24357	0.604208	2.24401
0.867443	0.892869	0.398563	0.52394
0.32338	1.71012	0.390731	2.63686
0.901958	1.10867	1.45428	0.70226
0.411276	1.84205	2.1485	1.29228
0.585562	0.327633	1.25712	0.337584
1.02332	0.400901	0.999805	1.64468
1.61332	0.706074	0.733385	1.21328
2.20102	0.371471	1.18067	0.93564
0.724062	0.167316	1.58369	1.45217
1.03051	0.0753872	0.732333	1.99962
0.566288	3.68581	1.71181	2.57164
1.06631	0.429703	0.687428	0.753726
1.50066	0.567998	0.969103	0.572864
0.721739	0.590867	1.25882	0.332922
0.838217	3.18177	0.578782	0.818314
0.466761	0.525635	4.52487	2.41619
0.215801	0.930774	-0.120511	0.787613
1.87128	0.666049	1.30265	0.129615
1.5193	0.999381	1.23361	-0.279118
1.24927	0.553809	2.06252	0.161164
0.851354	0.457438	2.8948	2.05002
0.519907	2.17391	2.95897	1.41215
0.994296	1.56589	2.51614	0.770034
0.885022	1.99369	4.13033	1.14912
1.52502	1.39308	1.53095	0.410429
0.565864	0.56715	0.623687	1.08536
0.846692	1.77725	2.1953	0.490696
1.36872	1.26114	0.504023	1.16712
1.17748	1.22345	2.84038	0.545757
0.976717	0.631315	1.18151	1.55678
0.370185	0.477779	0.847759	0.460623
0.792479	0.969308	0.394968	0.796074
2.08708	1.36809	5.35188	2.80501
0.192289	1.46022	1.37043	1.36767
0.750336	1.10104	0.530516	0.72979
0.75244	0.68151	0.623483	0.356844
0.442825	1.18723	0.57244	1.91978
0.348792	1.07097	1.11503	0.737418
0.424398	0.699513	0.22831	0.751388
0.849016	0.361081	0.81133	1.26136
1.11374	0.596157	0.52226	0.474389
1.53985	0.992396	0.478845	1.07373
0.802854	0.285694	0.757116	0.628349
0.792684	0.379289	0.551909	1.34564
1.2279	0.175558	0.388407	1.98352
0.389459	-0.122411	0.741656	1.10486
0.278066	1.27026	1.01887	1.2171
0.464437	1.15398	1.14849	0.93225
0.485407	0.798193	0.896887	0.820229
0.467608	0.397292	0.163926	0.728738
0.368505	4.13351	0.542586	0.700141
0.120716	1.11396	0.42377	2.06548
0.406191	0.308139	0.762611	1.48838
1.31791	0.943692	1.27999	0.443687
0.809006	1.15039	0.644656	1.97676
0.51526	0.58451	0.650998	1.10041
0.500019	0.0872528	1.16563	0.0548563
1.49093	0.201188	1.70588	2.06972
0.247146	0.452791	1.35644	2.82196
0.165826	0.375694	1.17875	1.09702
0.54301	0.614364	0.727671	3.53057
0.781256	0.0792011	0.437535	1.11757
0.579016	0.793107	0.393273	2.18176
0.676425	0.29734	0.965713	1.49601
0.784647	0.763882	0.924198	0.83357
2.40095	0.304749	0.949405	0.711583
1.27068	0.294374	0.496834	1.35243
0.373794	0.464013	1.67453	2.42636
0.113088	0.859405	1.43205	0.391154
1.62774	0.490696	1.0392	2.39078
0.460419	0.28717	0.501919	3.77497
0.571593	0.765577	0.972903	1.64807
0.0849293	0.150365	1.19019	0.264944
0.0385485	0.660321	1.27512	1.57585
0.0762494	0.984988	1.48435	2.79358
0.470575	1.11735	0.974598	2.61944
1.06483	0.471203	1.46467	1.97611
1.09067	0.55169	0.742489	0.626025
0.702903	0.918909	2.34016	0.213682
0.455538	1.04746	2.41428	1.39542
0.0705212	0.413395	1.15165	1.09998
0.142314	-0.00401851	0.801787	2.27832
1.60149	0.718991	1.11925	2.37891
0.846692	0.00783244	0.637657	0.317667
0.659065	0.640638	1.41213	1.88906
0.810701	0.527959	2.04833	2.45494
0.987326	0.336517	2.3931	3.13137
0.720263	0.171539	0.49641	1.67518
0.516532	1.51464	0.743979	4.18476
-0.158621	0.943049	0.902805	2.52568
0.148889	0.802854	1.92888	1.22239
0.0730638	0.457657	0.688495	1.60274
3.5526	0.555504	0.274033	0.642742
0.195899	0.50509	0.216853	0.232752
3.71737	0.569693	2.61484	0.683205
2.00873	0.00042377	2.08115	3.46026
3.32049	0.587696	1.25204	1.9615
1.57733	0.204374	0.708616	0.4602
2.02588	0.0400243	2.14447	0.259011
1.09257	1.72071	1.53942	0.85771
2.02673	0.0713687	2.28022	1.21413
1.00469	0.623906	1.42632	2.19615
2.07818	0.910652	2.4651	1.66204
1.45492	0.469523	0.597428	0.499157
1.13408	0.693799	0.247774	0.501919
0.606327	0.14189	0.360657	0.567574
1.49833	0.0770969	6.97642	1.14595
1.86726	0.555285	0.775104	3.85904
2.16291	0.544486	0.0823721	1.23869
1.22239	0.315343	1.56207	0.759863
1.30308	0.636824	0.251588	0.426736
1.1076	0.439873	0.080677	1.26729
1.2478	0.155874	0.333975	0.192508
0.982649	0.251383	1.53836	0.115207
0.544486	0.113731	0.560575	0.758168
1.19613	-0.154588	0.702464	0.601666
1.26644	0.21453	0.793955	-0.0658597
0.731485	0.983088	2.09766	0.596157
1.27385	1.09087	1.86131	-0.0684023
2.03033	0.862576	1.11184	0.536449
1.15547	1.13049	0.424194	-0.155027
1.37021	0.0216123	0.337569	0.260487
0.536654	-0.00613736	2.54155	1.12159
1.54705	0.0510424	1.12962	1.87891
1.25246	0.1347	0.24735	0.478202
1.96828	0.912348	2.1197	0.416142
1.83994	0.878037	1.34161	0.247365
1.6199	0.91489	2.85732	1.31325
0.820229	0.661812	-0.274252
0.689971	0.209883	1.52481	1.2339
2.16036	-0.056113	0.277862	0.847021
1.36005	0.512718	2.50005	0.84112
0.912348	0.157774	0.645928	1.20564
0.774272	1.08728	4.1299	2.42271
1.5697	0.47905	1.91152	1.37657
0.995582	-0.119649	0.627077	3.35107
1.03603	0.267267	0.176844	0.952423
2.22411	0.337788	0.954914	1.59861
1.88484	0.307935	3.74448	0.385414
0.594462	1.04873	1.20248	0.439004
0.525007	0.0328349	0.869561	1.20228
1.06187	0.427379	0.265148	0.46891
1.45556	0.177472	0.454691	3.20459
0.731705	0.243755	0.139143	0.421546
0.613736	0.212002	1.17368	1.15262
0.668797	-0.478407	1.03349	0.634632
0.713059	-0.313634	1.63493	0.336779
2.15147	0.711159	2.00936	0.356464
2.14045	0.666049	1.36026	4.15035
1.25754	-0.0997467	2.60573	0.611394
0.825519	0.106746	1.23446	0.500086
0.537925	0.365319	1.32722	2.18854
0.602937	1.60593	0.923994	4.44611
0.517584	0.981597	2.03773	7.60619
0.817891	-0.139128	1.78784	0.853562
0.752878	-0.0836434	1.8232	0.889816
0.828689	1.5407	-0.141904	3.3966
1.69127	1.06122	8.96079	15.8701
0.206697	0.228091	0.788241	0.210611
-0.0167316	-0.204783	1.57881	0.28141
2.19997	0.241651	0.710721	1.41987
1.30922	-0.0260399	2.47273	0.312967
0.639571	-0.022869	2.57776	0.363443
0.461895	-0.175777	1.04893	8.73582
0.440078	0.142957	2.71501	0.355316
1.17156	0.553385	1.66818	0.167119
0.577306	0.170487	2.76922	0.11632
0.936912	0.0650268	0.289917	0.383316
0.647827	0.0156795	0.85283	3.61908
0.705635	-0.0110034	2.34799	0.827783
1.05995	-0.204579	2.73343	0.43132
1.90261	0.667306	1.51569	0.532467
1.1995	0.510599	0.247569	0.874259
1.53327	0.541724	1.72917	0.193914
0.894549	0.836098	3.6013	0.783021
0.455743	0.373999	2.93652	0.73337
1.57564	0.460828	0.274048	0.99262
1.82955	0.418042	1.48872	0.707464
0.805806	0.442401	0.374423	1.30216
0.559932	1.07372	0.297121	0.651271
0.966122	0.310682	0.295222	0.859341
0.660321	0.49302	0.721958	0.593488
0.632572	1.3361	6.88685	-0.000127053
1.27723	1.08621	0.399834	0.137783
1.06292	0.535791	0.6383	0.191947
0.761763	0.441773	0.0645884	-0.017713
0.952781	0.827842	0.370609	0.820993
1.41679	0.967832	0.677477	0.310808
2.38208	0.836098	2.06654	0.171947
1.43966	1.59067	0.47566	3.94869
0.888616	3.16758	0.346688	0.546185
1.75119	0.405972	1.18046	0.594566
1.29693	0.414242	1.04301	0.461988
1.18299	0.76283	0.538553	1.67595
0.375051	0.230838	1.20503	0.059496
3.319	0.353877	1.6686	0.128893
1.19062	1.64785	1.18448	0.198803
1.21645	0.353673	2.22029	1.01192
1.35411	1.11586	0.22131	0.131627
1.77321	0.754135	1.2046	0.125849
0.297326	0.70565	0.10207	0.801242
0.411057	1.99813	0.555285	0.760988
0.427993	1.4547	0.0436191	0.447386
0.87887	0.69887	0.690614	0.407955
0.328466	0.371661	1.77682	0.679017
0.418261	0.761339	1.84438	1.10545
1.02606	0.75244	0.373575	3.0021
1.36173	0.917418	0.271081	0.713812
0.505295	0.232533	-0.0133414	0.659648
0.785056	0.644013	0.118597	0.271885
0.0330248	0.633215	0.62623	0.405861
0.612245	0.718772	-0.142533	1.89678
0.952781	0.812382	0.0821675	2.37617
3.4916	0.772986	0.221734	0.703017
1.06249	0.257097	-0.0550609	1.08303
0.641895	0.558251	0.829961	0.360209
1.07519	0.856424	0.862372	0.72416
1.25288	0.78019	1.25627	3.70607
0.920385	0.69887	1.7277	0.12839
0.821266	0.271067	1.32786	0.42548
1.02013	1.34415	1.54683	1.24279
1.22683	1.85455	1.30625	4.17016
0.837369	0.585358	1.12498	4.10044
0.967818	1.18511	0.710092	6.47204
1.53772	1.09045	0.810687	0.384591
1.80117	1.40959	0.80604	0.632222
1.71731	1.49325	0.77829	0.865882
0.54659	1.80139	3.65256	0.327381
0.853034	2.24189	0.591291	2.82013
0.253283	1.5337	0.0739113	0.877628
0.720248	1.91109	0.246941	1.29282
0.817248	0.729367	2.96322	0.42275
0.931183	1.5085	0.69019	0.642123
0.470779	1.22451	0.119021	0.498181
2.99963	1.91427	5.78199	1.20075
1.99686	0.833351	0.676001	0.389476
0.20246	2.13853	-0.0209693	1.09611
0.745251	0.837165		0.420717
0.222362	2.22241	0.350873	0.09391
0.984768	1.26368	0.306935	0.432336
1.21138	0.959985	5.13052	0.452082
1.22864	0.515041	0.212963	0.256328
2.40497	0.357267	2.97404	0.905312
0.742708	1.67898	0.115689	0.305095
0.518431	3.95221	0.131119	0.286426
0.517584	1.67411	0.577931	1.73411
0.436688	1.18935	0.188074	0.853689
0.167944	1.2065	1.54013	0.279311
0.122192	0.571593	3.37514	0.621742
0.366166	0.870409	2.08828	0.972488
0.599766	0.74376	7.61152	0.605931
0.268743		2.61205	2.45948
0.191661	2.95455	2.54158	0.544976
0.531568	0.935914	0.380845	0.14318
0.324871	0.14966	2.02473	1.6329
1.61969	0.248394	1.68522	0.55539
2.31326	0.224709	0.288902	0.306869
0.781885	0.865374	2.11495	0.12159
0.628144	0.410303	0.44491	0.541926
0.706921	1.72332	1.08709	1.94707
0.98075	0.559136	0.641488	0.753873
0.33906	0.681488	0.206803	0.77432
0.706498	0.551197	0.23309	0.895091
0.740385	0.890832	0.750828	0.195947
1.5875	0.186168	1.83392	0.471767
0.836946	0.238488	0.741685	0.576726
2.80184	0.16534	0.890771	0.128644
0.747998	0.413037	0.710951	0.253726
0.265777	0.225279	0.392591	0.206488
1.26326	0.361984	0.172517	0.185472
0.72301	0.847402	0.652156
1.04725	0.350426	0.509611	0.502565
0.849659	0.292836	0.303316	0.27315
0.851354	0.107176	0.829435	0.0926782
1.49474	0.319316	0.919345	1.582
1.18363	0.0999384	0.54555	0.545049
1.43544	0.0590491	1.13357	1.41944
1.20693	0.822447	6.3648	0.337637
1.10655	10.7044	1.26507	0.208577
1.77874	1.35415	2.28226	0.295668
1.62795	0.384078	0.763652	0.209143
0.678748	0.63514	0.960677	0.306516
0.558675	1.28514	2.64755	0.373779
0.541096	1.74312	0.952042	2.3854
0.476288	0.136319	3.21722	0.532847
0.304544	0.030541	0.619455	0.686961
2.8622	0.299123	10.3902	1.86362
2.08327	0.336902	0.836927	0.547156
4.26503	1.94262	4.99565	3.21071
1.39711	0.738509	0.537865	2.15809
0.500224	0.128385	0.200705	0.184465
1.28592	0.0659056	0.222102	0.648952
0.614803	0.0334588	0.238107	0.541673
0.522465	0.889877	1.19434	0.75803
1.60762	0.157467	4.268	0.298942
1.09087	0.13918	0.450496	0.502343
0.761558	0.307123	0.317852	4.74942
0.636824	0.44148	2.46328	0.301204
0.430974	0.367635	1.83107	0.399092
1.4833	0.24166	0.707775	0.487709
0.907481	0.146545	1.87316	0.340361
1.15885	0.638377	0.38332	2.74488
0.873375	0.263627	0.563832	2.85842
0.319786	0.138098	0.340521	0.639955
1.98459	0.243119	3.16726	0.850605
2.11419	0.0886351	0.357476	0.583265
1.20354	0.27493	0.348967	0.424282
1.02311	0.69025	0.427574	0.936342
2.51488	1.16665	2.83842	0.422141
0.851135	2.51611	2.6645	0.289224
0.576678	0.670631	0.718447	0.497476
0.302849	0.812414	0.11918	0.543455
0.305392	0.410812	0.211693	0.549024
0.197375	0.0581642	0.0469878	0.45141
0.31492	0.10191	4.48204	1.36398
2.54008	0.42948	0.143689	0.546111
0.385645	0.216648	0.142037	0.435319
1.50406	0.582947	0.760668	0.848755
3.4628	0.162611	0.10718	2.94104
0.217073	0.0527009	0.921632	1.07613
0.192713	0.368718	0.186803	1.08247
0.919975	0.0702912	0.209472	3.812
0.54491	0.597992	1.9432	1.44211
1.316	0.296139	0.352586	0.415064
0.766425	0.309598	0.506308	0.341785
1.7944	0.401857	0.17582	1.10506
0.322971	0.294045	0.273156	0.448309
0.613531	1.00189	1.11777	0.611678
1.20184	0.130357	0.558627	0.831977
-0.0648076	0.497357	0.241537	1.01937
0.623687	0.187947	0.409414	0.672104
0.175338	0.11918	1.79272	0.956239
0.0688261	0.0584139	2.40963	6.12377
0.523093	2.29255	0.45907	1.70594
1.75587	2.15242	2.64571	5.4152
3.44057	0.480402	0.579582	2.62079
1.89649	2.3843	0.351951	2.21474
0.117545	1.74935	0.590439	7.45794
0.281676	0.647775	0.0537786	1.84018
0.629196	0.25093	0.405226	6.1707
0.481593	1.17973	0.359381	1.18547
1.27724	0.444021	0.549484	0.244736
0.198017	1.5402	0.140385	0.526506
0.37359	0.290172	0.217279	0.833262
1.07394	1.37371	0.198738	0.298924
0.638943	1.65671	2.01717	0.360412
0.106951	0.318869	2.70457	0.202133
0.318938	0.0384183	0.521169	0.294331
0.264096	0.252714	0.361221	1.31369
0.327413	0.218615	0.522119	0.31248
0.328261	0.0917544	0.754066	0.453656
1.1434	0.08991	0.253787	0.252774
0.265791	0.0982911	0.160197	0.35582
0.349011	0.043242	0.396967	2.72627
0.546181	0.030541	0.09575	0.265233
0.467404	0.262996	1.07091	1.4254
0.165826	1.96473	0.269914	2.6635
0.416157	0.0327666	0.247627	4.09355
0.815143	-0.0109835	0.501545	0.905735
0.221734	0.164008	0.312775	2.68934
0.598276	0.156201	1.0015	1.10965
0.622007	0.00888935	0.664472	0.641034
0.695494	0.0740371	0.46764	0.157611
0.773848	0.010541	0.278234	0.697039
0.814077	0.0125126	0.290808	0.267975
0.755421	0.0127667	1.04894	1.72889
0.501495	0.0435618	0.86023	1.40177
0.883765	-0.00349178	0.434303	-0.0321146
0.427803	0.015115	0.230611	0.117562
1.36407	0.146865	0.190102
0.936283	0.0200043	0.341537
0.38756	0.194041	0.295697
0.232752	0.132197	0.155053
2.66037	0.176517	0.167881
1.59682	0.0322584	0.328586
0.755421	0.0179058	0.246041
0.383541	0.0133976	4.60649
-0.0652167	0.067496	0.248389
0.831451	0.0387995	0.332266
0.297764	0.0234961	0.63082
0.489221	0.064197	0.311758
0.442197	0.056197	1.05637
1.44434	0.00431981	2.07609
0.957253	0.0492748	0.385795
0.65715	0.144074	0.231312
0.782323		0.579898
0.142109	0.084589	0.295057
0.248417	0.152161	0.102607
0.26452	0.140114	0.509611
3.549	0.0619506	0.255312
2.41048	0.0987963	0.232201
1.14954	0.0865424	0.31798
0.243755	0.21514	8.24507
1.12074	0.268848	2.38728
1.36195	0.445139	0.232836
1.16415	0.248009	0.491767
0.847335	0.172949	3.11728
0.332703	0.113979	0.0682539
0.209459	0.237282	2.53243
-0.0707257	0.250564	0.201787
-0.0431953	0.271539	0.210357
1.25946	0.128375	2.14168
0.275319	0.048772	0.311758
2.607	0.226039	0.971533
1.61418	0.0710166	2.94343
0.377184	0.451719	0.455894
0.944116	0.147431	0.679902
0.133005	0.144758	4.73215
0.202884	0.160438	0.49507
0.169639	0.202082	0.47348
1.76413	2.00109	1.89088
3.18051	0.208371	0.292328
2.52885	-0.00728281	1.15014
0.416361	-0.00243352	0.112955
0.550419	0.288403	0.25182
0.257111	0.225783	0.700603
0.709888	0.904775	0.156451
1.25395	0.56635	0.239373
1.37868	0.358853	0.218422
0.637043	0.346463	0.218229
0.521822	0.545426	0.308012
1.40304	0.45501	0.897816
1.72346	0.113963	0.119877
0.367657	0.113517	0.118672
0.422294	0.28967	3.19011
0.895192	0.0482411	2.44043
0.500019	0.280125	0.396144
0.574559	0.230529	0.244201
	0.109747	0.453353
0.168451	0.401833	1.24603
0.284201	0.808894	0.552213
0.233914	0.540165	2.72152
0.651201	0.93456	1.14132
0.152451	1.32006	2.96851
0.331504	0.812835	2.45255
0.511324	1.87185	0.846955
0.494623	0.989743	0.909562
0.268897	0.541364	0.706062
0.502115	1.0939	0.27525
0.639963	2.33726	0.103566
2.5278	0.475198	1.59289
0.859336	1.52632	0.202738
0.91007	1.3944	4.44998
0.719775	1.19767	2.47459
0.398746	2.249	2.45808
0.732791	1.8992	0.547832
4.12723	1.7629	0.199119
3.36935	0.291881	1.05001
0.370873	0.425517	6.50727
0.221086	0.459534	0.468529
0.305725	0.567465	0.472656
0.492336	0.54025	0.484336
0.395635	0.482601	1.28698
0.197721	0.510912	0.267184
0.570566	0.492814	0.167877
0.105275	0.544518	1.85227
0.193406	0.572485	0.410431
0.834767	0.419056	0.180766
0.492021	0.818182	0.106738
0.335189	1.56002	0.513357
0.349922	1.67227	1.66998
1.73252	0.273989	0.518627
0.218168	0.384628	0.110418
2.7781	0.269225	1.79843
0.132004	0.210497	4.20813
0.600029	0.395167	0.252648
0.441226	0.0620878	0.524468
2.26931	0.649792	0.208389
0.82575	0.435731	0.343189
0.575644	1.17943	0.567517
2.16842	0.380395	0.725304
4.26	0.227086	0.179373
0.752734	0.256442	1.52382
0.705808	0.220522	1.85431
0.285725	0.228337	0.198107
0.157279	0.102257	0.786657
0.952296	0.116533	0.395005
1.06818	0.562923	1.4207
4.23886	0.523611	0.157467
1.24399	0.465823	1.38864
1.16469	0.813932	0.60898
0.455451	0.208971	0.248709
0.278426	1.87616	0.619394
0.112131	12.1806	1.69221
2.68488	14.3606
0.116578	0.64938	1.22994
0.0973404	1.82025	0.194318
1.2358	7.44514	0.168801
0.0965781	1.2776	0.623126
0.344586	6.63427	0.169264
0.158484	4.08667	0.133276
0.0928935	3.98731	0.135915
0.28973	3.45675	0.193975
2.71784	2.71895	0.27039
0.276836	0.300912	0.761646
0.96182	0.567242	0.400667
3.36149	1.62241	0.488822
0.235119	2.17259	1.05642
0.275947	1.40594	2.91896
0.177406	1.26784	3.60303
0.116955	2.69196	2.42637
0.214102	2.37439	9.02608
0.559832	1.01406	3.25703
0.53539	2.17259	0.399331
1.95812	1.02225	0.470331
1.79208	0.66136	0.440649
2.36906	0.565974	0.898162
0.220262	0.811945	0.170807
0.256013	1.08792	0.441078
1.09618	0.140011	0.312669
0.154357	0.307134	0.705967
0.592787	3.97986	1.35674
0.366049	0.259029	0.494991
1.98688	0.756557	0.286621
1.46565	0.131992	1.13052
0.279377	0.111529	0.310646
0.165783	0.7205	0.696027
0.943599	0.83244	6.0284
0.088451	0.235054	1.67043
0.0972133	0.477991	0.619801
4.11536	0.0797397	3.62215
0.132898	0.260623	1.67084
0.153152	0.472576	0.642953
0.280012	0.642011	2.75657
0.209472	0.480237	0.452473
2.55275	0.269295	0.40329
0.1675	1.59829	1.92094
0.976742	0.253923	3.72858
1.23625	1.4524	1.34393
0.180963	0.832715	0.804849
0.257918	0.144313	1.13525
0.120639	0.600386	1.19222
0.113275	0.755802	0.419296
0.366111	0.138709	0.415817
0.0705453	0.259715	0.959975
1.47854	0.121126	0.877048
0.46675	0.128427	2.06198
0.270299	0.583505	1.25864
0.123816	0.0962942	1.44276
0.126037	0.292447	1.23019
0.552599	1.62241	0.455867
2.39541	2.88059	1.95702
0.400779	1.86136	1.89428
0.443004	0.619544	0.470364
0.369668	1.29854	2.17745
0.521804	0.380909	3.39767
0.185152	0.729103	3.49659
0.565996	0.0495442	2.05612
0.58314	0.593941	1.64776
0.256521	1.10434	2.31006
0.934898	0.778886	0.717003
6.10116	0.589657	1.08962
3.35869	0.738717	1.31821
0.138357	0.36019	0.649072
2.80832	2.0178	0.538005
4.62262	0.28722	0.777549
0.173467	1.25275	0.188424
0.65698	0.320346	0.0754036
0.497353	0.151219	2.113
0.344586	0.373317	0.188406
3.28796	0.581687	0.39114
0.252389	0.629175	0.113089
1.49143	0.624222	7.94873
0.288709	0.741526	0.459654
0.253853	0.136789	0.253443
0.172258	2.28821	0.219957
0.187627	0.488565	2.40672
0.395762	1.96953	0.322026
0.558627	0.572125	0.167414
1.28253	1.44832	0.0952997
0.435447	0.51463	1.33172
0.661681	0.339197	0.742795
0.146545	1.18845	0.529797
0.0603197	0.634436	0.747371
0.300709	0.386135	3.05124
0.110479	0.946418	0.795629
0.197914	0.653836	0.554337
0.267439	0.118931	2.99949
2.22226	0.461505	3.22908
0.535136	1.36088	1.07891
1.45556	0.304768	0.262473
0.823783	0.310285	0.23341
0.482623	0.380651	0.227479
0.742254	0.699968	0.13146
0.201594	2.9713	1.42244
0.506435	0.0456018	1.01584
0.0904795	0.327526	0.267203
0.350299	0.669053	0.260211
0.187312	0.459157	1.15549
0.97382	0.978534	0.260331
11.9221	1.54137	1.23815
0.501164	0.0316688	1.41889
4.96568	0.156189	0.286311
2.92203	0.0460133	0.53821
0.75521	2.77727	0.417137
0.212074	0.148322	0.461043
0.207566	0.216785	1.73351
0.310869	0.308983	6.31276
0.173152	4.40195	10.7448
1.90123	0.231266	1.46398
0.609804	0.224909	3.52749
4.85031	0.348947	0.61298
0.595964	0.375287	2.36807
0.425541	0.0721648	1.15056
0.142291	0.113927	0.339727
0.25525	0.40257	4.69354
0.219947	0.238995	1.09394
5.76839	0.107159	0.407043
0.417734	0.226212	1.19133
0.307631	0.0564155	4.75161
0.121971	0.102463	1.24157
0.542246	0.454838	0.473723
1.67842	0.540833	0.393881
7.07467	0.566179	0.530157
2.33947	0.0745474
	0.84238
0.25992	1.14816
0.163352	1.5887
0.125101	1.16487
0.0180291	0.294931
0.514597	1.35482
0.184757	0.497733
0.725778	1.08269
0.450195	0.288574
1.12002	1.33615
0.794841	0.255036
0.327493	1.15755
0.849542	0.298958
0.422296	0.367919
0.448841	0.149659
0.147157	1.02642
0.07052	5.94702
0.0624142	0.60825
0.102909	0.721117
0.120252	2.48683
0.793522	0.923079
0.193222	0.60868
0.0968429	0.408242
0.0950089	2.6514
0.0926439	0.710029
0.258036	1.00081
1.76786	0.470811
1.70968	1.84669
6.5576	1.20379
0.399811	0.446407
0.486165	0.629843
0.350575	0.188783
2.95682	1.09951
1.68803	0.169795
0.0701416	0.238293
0.375048	0.190498
0.358613	0.383497
1.20471	0.543198
0.594575	3.59016
0.182357	0.185887
0.0901241	0.175707
1.04864	0.265696
3.21413	0.159068
0.119994	0.666328
0.184859	2.68127
0.339693	1.09135
2.74307	0.478883
4.41324	1.0883
0.891031	0.542873
0.56623	0.613838
0.404626	0.60107
1.26337	0.24645
0.322488	0.413212
4.05367	0.292943
1.1176	0.553241
0.431738	1.0551
1.97316	1.86036
2.23476	6.67342
0.247119	0.480305
2.82012	0.544724
0.917235	0.547294
3.03949	3.41455
0.354484	6.49144
0.544415	3.46576
3.85203	1.32678
0.363429	3.49323
0.420256	4.48215
0.22688	3.4477
0.55175	1.78765
0.417873	2.42219
0.146009	0.686809
3.54363	2.48842
1.49621	5.31555
0.961003	3.71116
0.331382	0.247753
1.43716	1.47205
0.449012	0.379967
1.45575	0.534441
0.121812	0.163661
0.374757	0.138041
0.850109	3.86183
1.53549	0.270375
2.46001	0.323757
1.52137	0.378938
1.06139	1.58619
1.51236	0.508975
2.14383	0.280999
0.291932	1.50187
0.425876	2.82795
5.53401	1.39288
0.4826	0.423032
0.567362	4.48837
0.55917	0.463305
0.239149	0.844762
4.38532	0.330628
0.545152	1.06384
4.9156	0.234798
2.19265	0.163438
0.373625	0.307459
0.510946	0.325967
0.160113	0.203985
0.228628	0.365828
2.14887	0.356489
4.28236	0.486252
0.935965	0.403342
0.682764	0.361253
0.584755	0.402948
0.427042	0.104297
2.03813	0.461848
0.148065	1.64903
0.12409	0.510432
2.49381	0.30775
0.727492	0.1912
0.488684	0.133088
0.465155	0.250392
0.691007	0.965048
1.11455	2.66271
0.28105	0.687905
0.219082	3.87824
1.90017	2.64502
3.5261	1.90771
2.94009	0.431138
0.322573	0.825671
0.18066	0.158571
1.16641	2.15692
0.296868	0.318358
3.17169	0.515214
0.639646	0.270751
0.649534	2.08832
1.01634	1.85608
0.635533	0.23394
0.3023	0.355254
0.395166	0.318376
2.07468	0.640469
0.311108	0.244839
0.942408	0.355906
0.202493	0.233357
0.22729	0.648301
1.58449	0.676611
1.02011	0.28818
0.267734	0.161467
1.75346	0.390129
2.21531	3.264
1.17726	1.5873
0.366684	0.499721
0.597009	1.72479
0.488805	1.86506
0.298993	2.13185
0.378029	1.01182
1.21157	0.288643
0.39491	0.496311
0.13941	0.657812
1.87754	0.117579
3.46514	2.29534
3.16954	0.702575
0.92858	0.822569
0.568115	6.02087
0.94899	0.369753
0.562768	2.82258
7.06901	2.65932
0.440992	4.39698
0.240332	0.916738
0.295102	0.273014
0.256767	2.78056
0.669928	0.846578
1.59292	1.35501
0.525735	4.94108
1.2226	0.273339
2.59779	0.586675
0.347748	1.27866
2.92911	0.07645
0.327852	0.122857
0.380874	0.115625
0.534749	0.182134
0.333609	4.94592
0.493706	0.862087
0.473449	2.00041
0.451822	1.19954
0.153446	2.33717
3.97006	4.33959
0.599939	1.7226
0.757396	1.34524
1.4867	0.00239923
4.67057	2.26309
1.2347	0.177935
2.16292	0.13576
0.233717	0.0677435
3.3932	0.952742
0.44214	0.674315
2.00324	0.360429
0.427213	0.654657
0.329017	2.71909
0.309292	1.48158
0.915966	-0.0133158
1.05337	0.0764654
1.23869	0.101589
0.249089	0.255532
0.683843	0.210959
0.930807	0.185184
0.289567	0.563797
0.409596	2.41802
0.440666	1.1783
0.556308	0.261993
0.305059	3.01143
0.770728	0.124176
1.90159	0.0675721
0.240297	0.298273
0.695874	0.0788138
0.194147	0.307218
0.0425854	0.286997
0.298787	0.336317
0.403821	0.565494
0.147894	2.5423
0.41388	0.873637
0.43131	0.106679
0.16743	0.149968
0.214866	0.473038
1.52166	0.353814
1.09923	0.474169
1.80321	0.198414
1.46821	0.712017
0.571029	0.49883
0.293046	0.215997
0.199922	0.543883
0.524107	0.700929
0.233598	0.684443
0.118967	1.98217
0.486388	0.763822
1.61335	1.1747
3.74372	2.92659
0.27452	0.304768
0.253922	0.0918032
0.477202	0.159153
0.41981	1.79582
0.162495	2.81333
2.03677	0.120886
0.200162	0.371603
0.194798	0.0746834
0.399896	0.502446
0.675411	0.145871
0.277537	0.0402559
0.609005	0.225972
0.334758	0.709823
0.384782	0.0745132
0.23202	0.449972
0.208903	0.393385
0.319591	3.34484
0.190668	0.0919072
0.294177	0.985887
0.282438	1.01881
0.139753	1.25563
0.124347	0.747799
0.124502	0.413076
0.109198	0.429048
0.251335	0.881418
0.206726	0.589298
0.506901	0.689961
0.70427	0.269414
0.580043	0.133431
0.141965	0.272962
0.554491	0.166762
0.48937	0.202099
2.8973	0.710287
0.47895	0.302986
0.505513	1.11567
0.268608	1.17052
1.59811	0.366377
1.63609	0.727784
0.843991	0.463888
0.364028	0.749308
1.11006	1.72191
1.97472	3.51858
0.520439	1.33848
1.83935	0.279731
0.874529	0.641052
0.945408	1.03199
1.57577	0.588749
0.438301	0.102327
0.381594	0.175297
0.135332	0.0545827
0.388689	0.0699027
0.16109	0.180027
0.22251	0.932676
0.229844	1.06946
0.460819	0.496329
0.0573071	1.34632
0.288641
0.615071	0.504285
0.409408	0.423005
1.34429	1.2572
0.768654	0.474037
1.1777	0.772947
0.214077	0.348701
1.06989	0.255074
2.66667	0.338707
0.313937	0.293758
1.56338	-0.00381851
0.793847	-0.0802131
0.975227	0.268399
2.69625	-0.0664438
0.464007	-0.142127
0.930842	0.181477
3.40473	0.0665787
0.314296	-0.195691
1.65054	0.0618684
2.034	0.397112
0.0847261	0.201777
1.17721	0.244458
1.48669	0.704416
1.0524	0.260136
0.93953	0.0308668
0.43693	0.0016886
5.40847	0.575746
2.10255	0.740658
2.98845	0.0784816
2.23862	0.448809
	0.859869
3.3585	0.303262
1.59302	0.318186
1.44992	0.605506
0.861867	0.176414
0.695357	0.527245
0.625227	0.157717
0.913745	0.258537
0.270176	0.693978
2.89495	1.11476
-0.142881	0.601464
-0.0587578	0.655649
0.256986	0.575126
0.271243	0.645168
0.0455279	0.270973
0.920052	0.239573
0.385298	0.0152771
0.298291	0.017456
-0.0087035	0.198712
0.735375	0.214388
0.290029	-0.0203429
0.885054	0.103219
0.368333	0.174284
0.163047	1.00417
0.685097	1.19431
1.04703	-0.066355
2.44356	0.369663
0.217413	0.400532
2.49291	0.274172
1.00981	0.247434
4.23072	0.918495
-0.096382	0.660136
-0.161006	0.164469
0.45063	0.877144
-0.0355311	0.201422
0.142259	0.21843
0.00897012	0.771838
0.382632	0.587606
0.501484	0.782941
0.000888737	0.504729
2.59053	0.637041
0.761222	1.23548
0.842857	0.514101
0.618518	0.709347
0.819627	0.891713
1.26124	0.533065
0.209371	0.563355
0.191115	0.568329
0.360423	0.0331775
0.953716	0.0566279
0.352608	1.24254
1.00985	0.423759
0.853559	0.0508113
1.14878	0.0735078
0.328802	-0.11499
0.338704	-0.0878073
0.401997	-0.079591
0.389249	0.522495
0.339905	0.361137
-0.00368673	0.102554
0.208305	0.497445
0.242684	0.751541
-0.0283354	0.670972
0.310148	0.994534
1.04423	0.988892
1.14896	0.459116
0.30997	0.229294
0.280522	-0.366331
0.912234	-0.25223
0.510724	0.0732841
0.328447	-0.323605
0.178903	-0.373261
0.34186	-0.211192
0.938216	0.46933
0.969928	0.661778
1.10499	0.304641
1.12142	0.479814
0.970682	0.741238
0.688738	0.382056
1.76433	0.424694
1.19986	0.277415
0.692958	0.429803
0.805015	0.269864
2.61416	0.346525
2.88984	0.328137
0.779922	0.518275
1.44432	0.804883
1.28709	0.243039
1.78089	-0.0120807
0.704548	0.421629
0.46773	0.172731
0.630688	0.320142
0.48856	0.349188
0.669415	0.375838
0.671594	0.440995
0.914762	0.643348
0.772858	0.644102
1.11778	0.868707
1.7431	0.588405
0.429533	0.763177
0.187784	0.67928
0.863598	0.99249
0.228602	1.33044
3.94198	0.645787
0.542927	1.43926
1.59742	0.431844
0.783833	0.409591
0.781209	0.472128
0.753364	0.670748
0.414391	0.504239
0.2986	3.42894
0.437973	0.864576
0.185032	2.07256
0.906947	0.733996
2.18178	0.75265
0.145014	5.87317
0.104463	1.58924
-0.0498766	1.09153
0.643835	1.50521
0.0884294	0.709035
4.59465	0.617896
-0.219852	0.420737
8.07961	0.451739
0.407462	0.477411
0.971794	0.415675
1.11978	1.32915
0.294157	-0.0293161
0.567529	2.03361
0.372727	0.259248
1.71845	0.00883834
0.368553	0.619318
0.891891	0.845655
3.74975	1.62775
6.65993	9.06943
0.941369	0.376016
2.26954	1.58592
1.41687	0.784718
0.911032	1.00586
1.31836	0.655827
4.26265	1.38529
0.509568	0.445123
0.867815	0.633042
0.337417	1.12685
1.11667	0.67799
3.11067	10.0853
1.78098	1.26902
1.52005	0.947097
1.39453	1.05818
2.32146	0.58805
0.964685	0.549543
0.730441	0.565044
	11.5068
0.117866	9.90878
0.229522	2.49104
1.40622	5.3127
-0.00735445	4.50889
0.718111	10.8045
2.13279	0.482964
1.39085	15.1806
1.08515	0.0545838
1.74519	0.501131
0.0823513	0.621583
0.631426	0.534576
1.1785	0.740392
1.41607	0.958733
0.0640836	0.969704
0.934551	1.01003
0.074791	1.33262
0.657868	1.08789
0.662527	0.847475
0.365453	1.05414
0.532318	1.32249
1.34328	0.608702
0.0452434	1.76379
0.258539	0.680209
1.34173	0.40999
0.860457	0.876522
0.208513	0.259291
0.819342	0.500641
1.24381	0.747897
1.38464	0.28754
0.254532	0.0940253
0.218569	0.223226
1.87168	2.26741
2.32393	-0.132934
0.733844	0.16669
0.352455	0.650559
0.00298352	-0.147322
0.330468	0.0357977
0.141979	-0.196356
-0.0709897	0.18703
1.17956	-0.293446
0.351801	-0.0281577
0.527169	-0.263379
3.40234	6.99447
2.19082	0.0203858
3.36773	0.29971
0.951471	-0.506105
1.68584	0.286563
1.02847	0.00786073
0.873003
4.13357	0.43182
0.637393	0.284201
2.08595	0.12751
0.438975	1.13697
0.322457	1.10179
0.553775	0.0740126
0.942972	0.324335
0.802668	0.219875
1.03288	1.64759
0.727549	0.310196
0.20835	0.132823
0.292867	1.38975
0.0200273	0.327848
2.0638	1.49004
0.186078	0.0590556
0.414616	1.06513
0.43215	0.510494
0.520305	0.00620955
1.71781	0.14108
2.17742	0.177085
1.19243	-0.0723404
0.380083	-0.0908534
0.812436	0.00735445
0.114107	0.119499
1.70215	0.0520649
3.41432	0.0580319
5.25546	0.0497779
0.217585	-0.169731
0.874227	0.276274
0.644995	0.0925257
3.84499	0.360709
0.951553	1.27008
1.44562	-0.0167167
0.794453	0.0281996
0.837407	0.521895
0.693955	0.376239
0.194374	0.394058
0.538449	1.90302
0.517197	1.30944
3.75537	0.180723
0.294051	0.0753606
1.45751	0.147862
1.88708	0.0289751
1.60554	-0.00658178
0.434967	2.5434
0.679774	0.131678
0.119868	1.96412
3.90058	0.256083
0.298752	0.404357
1.69357	9.65427
0.07291	0.216359
0.00841758	2.19711
1.28222	0.922778
0.0998435	0.0454042
1.45101	0.258291
0.198418	-0.0140998
1.88998	0.604532
0.188162	-0.0593009
1.71928	0.225106
0.809083	0.0944461
0.468153	0.0795285
2.08509	0.165436
0.61659	0.737848
0.237407	0.254326
0.740628	0.25359
0.605065	0.304023
0.193432	0.261233
2.95916	0.277825
0.199399	0.0413998
3.14483	1.25602
0.528477	-0.0342907
1.37655	-0.059628
0.145862	-0.0911383
0.654067	-0.0747064
0.905861	-0.0810823
0.103972	-0.0785894
0.512251	-0.0875823
-0.0204334	-0.083984
0.130903	-0.0723376
0.102255	-0.0646955
-0.0502686	0.0510864
0.0928951	0.0331458
0.375912	0.0536215
0.364796	0.0574228
2.09907	0.0292232
1.30315	0.0431595
0.183664	0.0341271
0.245173	0.0138968
0.942275	-0.0457736
0.178557	-0.0322039
0.237367	-0.0388252
0.689869	-0.0500627
0.036823	2.07042
2.55394	0.31081
1.61334	-0.0810428
1.36911	-0.0502686
0.0869704	0.147374
1.32407	0.883629
1.20539	-0.09122
0.474365	-0.16748
0.118357	-0.0120553
0.103563	0.0249313
0.927276	0.406074
-0.0406638	-0.0292204
-0.0608124	-0.0431172
1.70105	-0.0362506
0.218364	-0.0491632
0.297813	-0.0401337
0.0146722	-0.0463855
0.0369866	-0.0460189
0.0372714	-0.0614244
0.995527	-0.0171228
0.304474	-0.0167139
1.29996	-0.000163558
2.81653	-0.00997138
0.25253	0.0160625
0.846518	-0.0193703
1.20294	0.797764
0.0836174	0.0115252
2.00217	0.0353538
1.55662	0.00257462
2.83647	0.00609111
0.988785	0.0302018
1.57088	0.0677213
0.73315	0.0824753
4.21723	-0.0210877
0.140344	0.0930587
0.0310196	0.0863556
1.27765	0.104953
-0.0438109	0.117499
0.181132	0.00212625
0.105892	0.272842
0.4158	-0.0973901
4.62866	-0.0759753
0.22347	-0.052189
4.18131	-0.0427478
-0.0273423	-0.0371896
0.788198	-0.0026141
-0.0218237	0.0151234
0.116436	0.0290597
2.31298	0.0270152
-0.0161837	0.0171256
0.0892179	-0.0465068
1.33167	-0.0823513
0.944359	0.0485118
0.016102	0.153629
0.558476	0.661058
-0.00220803	0.310604
0.716882	0.0215388
0.0790829	0.332919
2.17954	1.59234
0.364468	0.181746
1.78834	0.0796554
0.285837	0.286615
1.27054	0.562114
0.536731	0.154035
0.417926	0.286697
-0.0650621	0.0872157
-0.0457736	0.157878
0.121625	0.241332
0.543804	0.183461
0.0736855	0.957562
0.190612	-0.0452406
0.338739	-0.0587285
0.0340848	-0.0731949
0.326952	-0.029869
1.95807	0.640827
1.80812	0.110551
0.541759	0.19846
0.636944	0.689748
-8.18e-05	0.0751181
2.02334	0.0333488
-0.0225597	0.160492
-0.00175683	0.338683
0.177209	0.210558
0.244437	0.606209
0.531746	0.220899
0.387192	0.279258
0.149418	0.462597
0.0641231	0.567793
0.124651	0.0530491
2.77382	1.49017
1.90306	0.103442
2.43538	0.165684
0.299325	1.45624
0.281669	0.102663
2.96562	0.357481
0.236016	0.353476
0.172996	0.403215
0.0111558	0.47126
0.583895	1.04527
0.097266	1.02283
0.102866	0.103318
0.26716	0.632531
0.159878	4.33105
0.814435	0.308399
3.31464	0.0680484
0.622966	0.373585
0.74496	7.5306
1.10714	1.79783
0.541226	0.273169
0.42005	1.03677
0.781414	0.236019
0.629096	0.332061
0.209656	0.353927
0.624973	0.168137
0.841205	0.164703
0.306967	0.56109
5.18975	0.124814
1.27331	0.0479393
0.92989	0.0252584
1.53994	0.205409
3.93196	0.384947
0.490549	0.217873
4.73569	0.165723
2.43432	0.865933
0.663221	0.185708
2.41805	1.23829
0.408606	2.5886
0.436603	0.674379
0.130494	1.48539
1.24054	0.760746
0.685577	0.553409
0.0686575	0.16221
0.448331	1.10551
0.906718	1.22047
0.704744	0.172099
0.104623	0.120973
0.438523	0.126123
7.49999	0.366882
0.281996	0.284449
1.35628	0.358341
0.501747	0.212602
1.79247	0.0908534
0.415637	-0.0105438
0.627542	0.406074
0.601181	0.276517
0.384208	0.330096
0.344647	0.506284
2.84105	0.518176
2.0994	1.03954
1.58424	0.486748
0.207244	0.854978
1.10456	0.727262
2.90166	1.13346
0.328094	0.411469
0.283589	0.509758
2.56338	1.41934
0.0761389	5.19469
0.953473	1.20886
1.20829	2.31355
1.90752	0.725463
2.86095	0.421767
0.948445	1.27736
2.74165	0.681122
1.93069	0.566812
0.218894	0.603102
0.714592	2.17926
3.55695	0.6407
0.0812064	0.224861
0.740544	0.914972
-0.0358417	0.117742
0.518994	1.63562
0.105686	1.01694
0.109978	0.576783
0.0214543	1.39044
0.368515	0.472975
0.389972	0.599873
0.790567	0.357847
0.812924	0.124893
0.514499	0.848765
0.307212	0.465048
0.252773	0.506405
0.532766	0.91105
2.23423	0.502522
1.04661	0.0405397
0.426223	0.199602
0.358053	0.0269729
1.0384	1.18924
0.178596	1.90968
4.42799	1.32158
4.83562	0.163597
0.223552	0.274842
0.479884	0.607966
0.728243	0.966428
5.79804	0.525454
3.14262	0.42369
1.38983	1.74735
0.898462	0.0678031
1.95967	0.957153
0.118847	0.229359
0.820036	0.904431
2.21661	1.6017
1.24323	3.47235
4.18429	0.96598
1.91283	0.0234198
0.722685	0.295769
4.4183	0.209985
0.235444	0.0173286
1.75217	0.0167167
0.260784	0.944114
1.96543	1.32236
1.60059	0.488958
1.32109	0.303084
0.416657	0.830295
0.805118	0.144881
1.17564	1.77306
1.08495	0.22241
0.183379	0.140426
0.630238	0.0832903
0.936838	1.2772
1.57656	0.918162
1.53561	0.622517
2.05722	0.21346
0.785418	-0.0206788
0.843822	1.31835
0.238306	0.117293
2.3556	0.334963
0.515807	1.55237
2.10397	1.9638
0.802707	0.44821
0.424545	1.14078
0.413347	3.84532
-0.0042525	1.73072
0.141489	1.26751
0.044138	1.5927
3.66366	0.29957
1.62499	0.0693964
0.296259	0.255841
0.256453	0.905207
0.776019	0.0300382
0.109282	0.618471
0.164863	0.208229
0.789301	0.427122
0.333491	0.455688
1.06827	1.05168
0.794614	1.77388
0.834381	0.175001
2.18469	1.09893
3.97018	0.660485
0.356499	1.89056
-0.0260339	0.1298
0.826042	0.412083
2.61647	0.544089
2.40984	0.302105
0.986495	1.9311
0.666083	0.189307
1.04347	0.133889
1.12353	0.531215
0.827148	0.110142
0.115128	0.108712
0.52537	0.103563
2.6085	0.149867
2.25866	0.128576
0.608496	0.0338395
1.37442	0.468931
0.252897	0.247014
1.09594	0.170058
0.165233	0.227478
0.742834	0.210558
0.308478	1.33164
0.208635	0.39872
0.385556	3.27373
0.384617	2.20235
3.12284	1.15692
1.334	0.991565
0.550177	1.51542
0.795759	4.63135
0.666328	0.688118
5.3786	0.789713
0.319594	0.42001
0.314648	0.219142
1.4609	0.316123
3.68074	0.272924
0.906637	0.22437
0.874351	0.14055
0.948812	0.088073
0.338559	0.356257
1.2154	0.177249
0.0655951	0.419601
0.890126	0.102336
0.719417	0.266385
0.0411545	0.14529
0.34379	0.212397
0.550831	1.72287
0.879785	0.861232
0.484869	0.352292
2.31257	0.855226
0.37583	0.50788
1.10166	0.609684
0.309172	0.357359
0.304065	0.383966
0.219221	0.0769172
0.629954	1.05663
1.40479	2.2527
0.317877	0.0349449
0.174877	0.0216601
1.02414	0.58876
0.552794	0.142061
1.23342	0.156285
1.96114	0.928627
0.555696	0.702457
2.73556	0.0697235
0.328136	0.145617
1.0608	0.117784
0.72575	0.149294
1.00709	0.132662
1.90809	0.117417
1.55723
0.75342
0.296423
0.951144
0.63257
2.26766
0.106177
1.02217
1.47459
0.25114
0.34011
0.443224
1.03051
0.745611
0.325234
0.978281
0.275865
0.094119
0.101519
1	0.65032
