# Supplementary material for: Critical role for Piccolo in synaptic vesicle retrieval
Source: eLife. 2019 May 10;8:e46629. doi: 10.7554/eLife.46629 (PMC6541439; doi:10.7554/eLife.46629)
Supplement: Figure 11—source data 1. [file elife-46629-fig11-data1.xlsx]

## Sheet: Fig. 11 B
norm FM1-43 intensity
Pclowt/wt	Pclogt/gt	Pclowt/wt + Pclo-Znf1	Pclogt/gt +Pclo-Znf1
0.985079	0.732149	1.03929	0.722631
0.843474	0.719653	0.782422	0.865576
0.648518	1.13562	0.600156	1.05727
0.608335	0.963448	0.925566	0.871824
0.751379	0.741283	0.937293	0.585543
0.939224	0.810786	1.10851	1.69117
0.688317	0.634668	1.07957	1.66463
0.592183	0.649666	0.968536	1.39854
0.636691	0.677837	1.41642	2.30488
0.636114	0.719653	1.39768	1.35297
0.427508	0.563435	1.0342	1.46266
0.595838	0.646303	0.973729	1.61234
0.532292	0.587566	0.913931	1.82297
1.02392	0.385493	0.861443	1.70434
0.723208	0.302817	0.726379	1.43488
0.801174	0.503259	0.692344	2.31295
0.991228	0.586797	0.899319	1.827
1.06016	1.00555	0.552085	1.64272
0.931629	0.46413	0.618901	1.64127
0.792617	0.3854	0.820974	2.07781
0.802136	0.486722	1.15013	1.78692
1.36951	0.588528	0.869715	1.07841
0.990365	0.522004	0.868269	1.32875
0.581417	0.556417	0.939025	1.10428
0.576509	0.469993	0.731858	1.2826
1.08707	0.468169	0.734935	1.50323
0.948928	0.690911	1.02737	1.34807
0.828092	1.19013	1.20214	1.39661
1.22906	1.28318	1.07274	1.12956
0.993151	0.791755	1.25405	1.16763
0.909421	0.694175	1.15984	1.31202
0.973736	0.731864	1.03679	1.33365
0.648804	0.955754	0.947966	0.965557
0.777719	0.818958	1.82989	1.228
1.4119	1.28895	1.11716	0.9123
0.760221	0.824344	1.03948	1.39979
0.902403	0.479419	1.17955	0.998723
0.73398	0.544497	1.12014	1.36806
0.953929	0.734935	1.66637	1.48688
0.845683	0.637846	1.34643	0.89644
0.795118	0.508446	1.19012	0.868945
0.767047	0.640532	1.07554	1.19926
0.944026	0.500566	1.63339	1.33942
1.37201	0.454034	1.43737	1.38383
0.715421	0.693505	1.04766	0.946812
0.885389	0.863082	0.949598	1.54764
0.795788	0.719361	0.711766	1.65723
0.75378	0.570744	0.858949	2.2819
0.755704	0.441829	0.998246	1.1782
0.688118	0.439905	1.34298	1.15696
0.749263	0.970851	1.84075	1.05207
0.695813	0.679562	1.80345	1.80662
0.888268	0.62054	1.55524	2.09598
1.03641	0.625349	0.640632	1.06813
0.825206	0.358576	0.757336	1.33519
0.680145	0.412026	1.26511	1.08207
1.02795	0.528345	1.04699	1.3349
0.862889	0.403469	1.1759	1.42892
1.08755	0.34454	1.29722	1.76192
0.839341	0.323871	1.0119	2.22336
0.822898	0.523636	1.12254	2.03965
1.04804	0.500373	1.55783	1.77721
0.874524	0.814819	1.00959	1.22569
0.884042	0.801745	1.26684	1.62349
0.81117	0.993244	1.5015	1.46574
0.966234	0.907205	0.742338	2.19952
0.862412	1.32423	1.02247	1.7152
0.8105	0.736667	0.993344	1.84334
0.953352	0.673214	1.19849	1.59446
0.7433	0.661393	0.752241	1.87642
1.23445	0.698022	1.22021	1.72222
1.0937	0.574777	1.74442	2.09444
1.11303	0.583042	1.10043	0.966712
0.799443	0.788671	1.49122	1.24377
1.12639	0.987188	0.780028	2.01485
1.08024	0.738298	2.72547	1.91055
0.67332	0.692151	1.22589	1.94207
0.737436	0.562088	1.11139	1.43334
1.18446	0.60669	1.099	1.69347
0.971328	0.896055	0.843474	1.61666
1.00978	0.844336	0.901634	1.10812
0.693889	0.650435	0.773103	1.0315
0.680238	0.595062	1.25819	2.03725
0.635345	0.563143	0.82713	1.47612
0.545366	0.546228	0.853762	1.32827
1.19743	0.62832	1.05833	1.55197
0.585258	0.50489	0.785215	1.11783
0.855871	0.497103	0.717344	1.33461
0.914608	0.478835	0.867121	1.04092
0.647457	0.449517	1.98688	1.29106
0.765123	0.481913	0.961047	1.49371
1.11553	0.517387	0.775796	1.62926
1.1833	0.690135	1.29626	1.50458
0.932683	0.581026	2.47331	1.73501
1.01757	0.605065	1.18984	1.39661
0.779252	0.322047	1.48833	0.800398
1.5363	0.642071	1.25271	2.38486
1.03804	0.472686	0.865682	2.17635
0.851639	0.384246	1.683	1.70751
1.12168	0.407794	1.72876	1.81758
1.18234	0.266196	1.78164	0.825684
0.684656	0.193231	1.40518	3.11644
1.33173	0.446923	1.32299	2.24057
0.833571	0.530561	1.59966	1.76702
0.833186	0.431256	0.953452	1.63608
0.96825	0.243026	0.922011	1.89074
0.893747	0.401546	2.96984	1.69598
1.33125	0.374728	2.23846	1.96216
0.806461	0.223511	2.11848	1.27328
0.831839	0.162944	2.03571	1.33
0.996223	0.829246	2.15338	1.58917
1.03535	0.727055	1.58235	1.84152
1.75125	0.7881	1.27251	1.96024
1.20214	0.360022	1.80576	1.78365
0.927297	0.372996	1.67896	1.99658
1.29481	0.762145	1.92477	2.13367
1.21339	0.340792	2.06782	1.44074
1.07881	0.820012	2.00409	1.48361
1.2455	0.581603	1.36874	1.72914
0.987765	0.45942	1.92699	0.73205
1.33586	0.397897	1.10707	1.4268
0.93797	0.438366	0.899518	1.9836
0.898841	0.447785	0.980562	1.84373
0.992282	0.462206	0.917593	1.64358
1.07746	0.309835	1.12111	1.81086
0.847222	0.272922	2.33921	1.75048
0.844044	0.428655	2.7818	1.13677
0.907398	0.348387	1.66262	0.939118
1.94669	0.532962	1.91756	1.40748
0.994684	0.477204	1.30943	1.72097
0.845298	0.543343	1.84941	1.68031
1.07919	0.737244	0.661201	1.56033
0.885289	0.586127	0.841935	1.98831
1.5163	0.944895	0.595446	1.51793
1.42959	0.780028	1.02285	1.0391
1.32366	0.662262	0.745608	1.01622
2.68423	0.600448	1.14254	1.60446
2.02543	1.0093	1.01488	1.33845
1.21906	1.02122	1.40008	1.06986
1.4268	0.541234	0.989211	1.48438
1.37133	0.790501	1.25251	1.09226
1.36115	0.602179	1.45382	1.72356
1.0565	1.68214	0.951137	2.21548
1.09293	1.00901	1.41239	3.13431
1.00343	0.767338	0.531715	1.79643
1.36663	0.89106	0.836841	1.69415
1.10438	0.604872	1.21397	1.54245
1.08332	0.562765	0.979593	1.50842
1.12668	0.751187	0.900188	1.43026
1.08515	1.04007	1.92314	1.12331
1.23165	1.11476	1.08409	2.41678
1.40719	0.742053	1.11735	3.20488
1.56043	0.756181	1.08371	3.15239
1.45469	1.11313	0.930952	2.96377
1.20426	0.60074	1.36596	3.45386
1.12303	0.693697	1.2231	1.67031
1.75318	0.707063	1.37326	3.53653
1.54774	0.751087	1.31865	2.60693
1.509	0.578532	1.2903	2.52964
0.807038	0.851838	1.55495	1.58398
1.03612	1.09909	1.08419	1.47016
1.48997	0.627657	1.64041	2.1553
0.901249	0.79935	1.37355	2.66538
0.919417	1.06766	1.76048	1.2628
1.27857	0.830108	1.94525	1.66954
0.776565	0.725808	1.31241	2.37352
1.09515	0.604388	1.58062	2.40966
0.92932	0.532962	1.63051	1.8792
0.805598	0.342809	0.904227	1.56379
1.14004	0.413081	1.85277	1.1781
1.08852	0.401645	1.35961	0.753296
0.913653	0.331851	1.69511	0.534494
1.43825	0.454034	2.08964	0.999493
1.64099	0.434234	1.48285	0.935469
1.2006	0.600833	1.12543	1.12158
1.36336	0.549014	1.59302	0.989304
0.855487	0.583142	1.03526	1.05583
0.867506	0.608905	1.34442	0.994299
1.46276	0.66264	2.03658	1.03016
1.45353	0.796843	1.20685	1.01987
1.06852	0.385686	1.34529	0.756467
1.36278	0.256863	1.39797	2.02917
1.66646	0.800498	1.6903	0.701962
1.43969	0.603134	1.25319	1.79874
0.680046	0.308396	2.15165	1.31116
0.542288	0.665718	2.23672	0.95777
0.763106	0.324156	2.72296	2.02495
0.627843	0.35646	1.25435	1.35394
0.587752	0.360692	2.12598	1.24627
0.812225	0.69312	1.73626	1.31837
1.22598	0.528252	1.82278	1.13418
0.634761	0.603041	0.90038	1.07871
0.512479	0.50239	1.18186	2.17953
0.390395	0.539595	2.9483	1.26002
1.00363	0.571992	1.88988	1.1883
0.699461	0.233985	2.18751	1.29885
0.639086	0.253692	1.17475	1.13735
0.497872	0.397698	0.829146	1.79134
0.705325	0.493833	1.146	1.41431
0.701478	0.315222	0.707348	1.38652
0.853848	0.317815	1.20484	1.2679
0.557664	0.428947	0.92682	1.57302
1.01093	0.394143	1.0715	1.42565
0.581026	0.524405	0.91346	2.1231
0.308389	0.438074	1.31548	2.0459
0.505945	0.441829	1.7352	1.52515
0.485468	0.314545	1.10851	1.56985
0.652352	0.593908	0.669758	1.43411
0.879134	0.418274	1.07938	1.20753
0.870577	0.43702	1.57716	1.46785
0.739353	0.383085	1.49016	0.996614
0.535171	0.552185	1.62493	1.30866
0.684556	0.328581	1.18157	2.09714
0.474895	0.518634	1.19743	1.41104
0.617362	0.592468	1.42931	1.29357
0.626974	0.273015	1.43325	1.91391
0.450187	0.532962	0.987095	1.36134
0.476527	0.542573	0.652744	1.4096
1.6432	0.493063	0.804252	1.3698
1.02353	0.544112	0.65092	1.27136
1.40056	0.560742	0.907497	1.11908
1.74847	0.521904	1.23608	1.08024
1.54207	0.518926	0.891923	0.799436
1.38893	0.298778	1.13129	1.039
1.36932	0.323102	1.31318	0.726664
1.27472	0.977	1.0863	0.90432
1.08044	0.653798	1.66445	0.739837
1.05919	0.603426	1.44536	1.08986
1.4692	0.359153	1.46632	1.76875
1.00267	0.350304	1.17465	1.16705
0.987865	0.469701	0.936915	0.867115
1.24243	0.428363	1.12351	2.93638
1.3225	0.48643	1.2779	1.35922
1.52823	0.555548	1.20791	1.99755
0.993921	0.458458	1.08092	0.800975
1.67464	0.594292	1.05189	1.601
1.46882	0.315792	1.08938	1.27443
1.05131	0.323486	1.08082	1.45631
1.34499	0.56843	1.07515	0.769063
1.3599	0.480281	1.61455	0.754158
1.27732	0.399814	0.663702	0.891538
1.67541	0.636108	0.5743	0.886729
1.63051	0.546805	1.53284	0.86135
1.83422	0.319062	1.50016	1.15253
1.72126	0.357229	1.68252	1.48198
1.1758	0.892685	1.07284	0.882112
1.07016	0.431634	0.864813	1.46632
1.1932	0.468355	1.4668	0.994491
1.13841	0.416636	0.783384	0.762237
1.23666	0.579779	0.889899	0.927582
1.16292	0.703978	0.963926	1.09812
1.11053	0.430964	0.839242	0.759637
1.13476	0.467778		1.46333
1.63618	0.327619	1.60697	1.25857
1.28607	0.471048	2.4885	1.83767
1.11024	0.445477	2.81821	1.23435
1.25624	0.35319	1.86632	1.28453
1.17417	0.453172	0.964202	1.66069
1.30645	0.5095	1.24566	1.86604
1.02795	0.515941	1.38911	1.7426
1.21147	0.434041	1.38367	1.11908
1.19311	0.473841	2.38011	1.28029
1.3299	0.36367	1.25579	1.68626
1.00363	0.387125	1.21908	1.60474
1.31895	0.468262	1.96783	1.33519
1.1387	0.582565	1.13141	1.0094
0.811655	0.340215	0.821402	1.19877
0.954314	0.365209	0.996557	1.25213
1.03035	0.602172	1.78037	1.32086
0.66197	0.580834	2.57095	1.2976
0.877602	0.786654	2.29983	0.788094
0.836648	0.656392	2.09952	1.10591
0.899226	0.354152	1.04872	0.815495
1.03247	0.351558	1.21494	1.05284
1.12802	0.324733	1.42681	1.30567
0.736766	0.538056	0.753654	1.6581
0.867698	0.385394	0.981195	1.53245
0.880965	0.473456	1.29163	1.22954
1.54995	0.340116	1.36396	0.507676
0.909613	0.565743	1.28782	0.882019
0.794826	0.46413	1.11049	0.775789
1.10553	0.302141	0.942962	0.931622
1.37595	0.477011	1.3218	0.954792
0.975368	0.45288	1.21942	1.70799
0.760221	0.696868	1.10962	1.03391
0.929128	0.479897	1.13489	1.43334
0.693889	0.458266	1.24577	0.666581
1.13783	0.42173	1.5256	1.26184
0.862504	0.356652	2.1652	0.886921
1.0963	0.491146	1.6354	0.796365
0.791848	0.499604	1.6562	0.907683
0.927204	0.579102	1.37114	0.843759
1.46757	0.627458	1.06823	0.742238
1.10899	0.390972	1.70609	0.688311
1.00305	0.560264	1.91784	0.630921
1.04545	0.400106	1.13304	1.11014
1.13427	0.337907	0.544302	1.82595
0.981324	0.382031	0.538635	1.24867
1.04391	0.550268	0.634596	0.983056
1.49516	0.48643	0.670214	0.794919
1.41306	0.585158	2.72268	0.73859
1.05314	0.379152	2.34929	0.836934
1.15773	0.406355	0.868458	0.860388
0.801267	0.270905	0.50912	0.935085
0.946235	0.303879	0.514456	1.38278
0.820881	0.534594	0.895906	0.943834
1.10063	0.533539	1.19796	1.50717
0.985941	0.420198	0.923902	2.17645
0.901919	0.40597	1.4694	1.43584
0.758583	0.498735	2.33012	1.33577
0.935376	0.303202	2.63118	1.03766
0.792903	0.45077	1.7441	0.749641
0.863082	0.472302	2.0126	0.93076
0.744361	0.655052	1.89692	0.834048
0.975175	0.388186	2.1053	0.737721
1.05458	0.49778	1.67232	0.861158
0.901919	0.537579	2.37368	0.89711
0.899325	1.47102	1.95977	1.13754
1.03535	0.301186	2.45864	0.774058
0.85741	0.342039	2.49273	1.02468
1.24146	0.600255	3.47317	0.837895
0.882696	0.835879	1.56819	0.841451
0.748494	0.59016	2.36213	0.675814
1.30212	0.764639	1.843	0.56959
0.979401	0.86933	1.97415	0.923934
0.72667	0.499504	1.32431	0.65092
0.941141	0.645918	1.28129	0.954792
0.73532	0.624957	2.55004	1.25396
0.748586	0.663894	2.3287	0.951714
0.686102	0.682255	2.39536	0.75849
0.68514	0.568914	1.89987	0.66274
0.950275	0.51758	1.68409	0.872501
0.811363	0.417313	1.91185	1.12745
0.881635	0.475472	1.15918	1.81864
0.80329	0.429232	1.23836	0.837219
0.839242	0.828954	1.01768	1.26713
0.821458	0.732819	1.65446	0.865483
0.758105	0.489992	1.25209	0.723016
0.98488	0.627073	2.87191	0.983248
0.794156	0.701962	0.869443	0.892115
0.731572	0.485568	1.20417	0.930952
0.70427	0.419714	1.18662	1.15552
0.78156	0.640532	0.671304	1.10063
0.859911	0.647742	0.915184	1.1362
0.915185	1.05208	0.724568	1.10178
0.889521	0.621886	1.1497	1.50996
0.741091	0.835494	0.836869	1.93323
0.80723	0.520173	0.766393	1.17801
0.935469		1.37147	1.04622
0.998246	1.06801	2.16826	0.907882
0.941817	0.715203	1.4157	1.23656
0.737536	0.59353	1.96413	1.59436
0.644956	0.56031	1.70946	1.5189
0.951621	0.632853	1.59923	2.43159
0.995745	0.897649	1.03304	1.72058
0.785599	0.382216	1.39129	1.29597
	0.488963	1.50708	1.07246
0.602023	0.656272	1.08402	0.824145
0.617708	0.409122	1.30263	1.3573
1.03772	0.936423	1.0057	0.707826
0.686004	0.919648	0.330154	1.48823
0.706154	0.610523	1.00995	0.987573
0.692543	0.7494	0.892636	1.76308
1.08151	0.991431	0.762147	1.08082
0.602354	0.598107	0.799621	0.752142
0.845257	1.28085	0.98838	1.16282
0.620865	0.869766	1.81283	1.12072
0.699728	1.0618	0.94209	1.22992
0.789377	1.1973	1.29294	1.75866
1.24653	0.865083	0.787851	0.894324
1.32223	0.802229	1.10526	1.23271
0.873028	0.713024	1.72918	1.04333
1.06528	0.81454	1.48377	1.24069
0.86824	0.692438	0.613575	1.54332
0.870202	0.615206	0.939152	1.07525
0.793518	0.690912	1.25121	1.39027
0.987839	0.497786	1.0142	1.59408
0.982179	0.668147	1.24686	1.05679
0.812796	0.426439	1.09829	1.97351
0.720104	0.588194	1.17988	1.91179
1.05984	0.677399	0.854298	1.45036
0.705508	0.679143	1.33444	1.98062
0.82685	0.518154	1.12987	1.11649
0.941654	0.849285	1.15014	1.35826
0.805611	0.461838	1.32681	1.07169
1.02422	0.489293	0.884903	0.976131
1.08794	0.696797	0.858981	1.40825
1.39446	0.353242	0.651695	1.28395
1.70663	0.514562	1.11691	0.800882
1.22442	0.583722	1.6794	0.529791
1.59999	0.765086	1.12824	1.03122
1.64378	0.581655	1.42985	1.36605
1.30437	0.548323	1.3584	1.28193
1.02302	0.428724	0.984021	1.08073
0.915838	0.470985	0.597559	2.24826
1.08751	0.703975	0.992191	2.18779
1.36134	0.431557	1.03903	0.990359
1.76381	0.549307		0.802521
	0.528285	1.83452	1.21397
0.914291	0.659534	1.59595	0.913746
0.584584	0.588081	2.02799	1.59388
0.811489	1.26331	1.55099	1.78807
0.789416	1.70521	1.51725	1.61109
0.503944	1.22638	1.26453	0.93797
0.483374	0.838282	1.6886	1.91564
0.992137	0.507376	1.73676	1.54985
1.08973	0.515764	1.21384	1.32192
0.417663	0.654092	1.41884	1.2878
0.372653	0.439186	1.65392	1.59936
0.370328	0.465326	3.16231	1.47853
0.33952	0.377098	1.40524	0.98017
0.495981		2.36726	0.871539
0.421493	0.60554	1.86865	1.05631
0.76269	0.656578	2.51481	0.844621
0.548437	0.609846	2.25214	0.72811
0.560917	0.917004	2.01379	1.30443
0.775945	0.52249	1.59419	1.04545
1.06417	0.629941	1.3283	1.05217
0.77745	0.673573	1.2403	1.18387
0.639276	0.499167	1.36862	1.07909
0.572318	0.668668	1.43713	1.14033
0.503727	0.821085	1.89834	0.742723
0.676887	1.16052	1.44307	1.23733
0.642848	0.682481	1.47456	1.2354
0.757699	0.663805	1.84012	1.2778
0.743714	0.703265	1.76128	0.994883
0.580282	0.650123	2.12344	1.70482
0.479716	0.640998	1.56299	0.977862
0.608596	0.811664	1.44018	1.06996
0.739109	0.938605	2.12378	0.867214
0.72095	0.532816	1.58111	0.830878
0.906805	0.89282	1.57354	0.961425
0.668882	0.567802	1.31466	1.29414
0.886968	0.398948	2.182	1.23569
0.75288	0.431781	3.32376	0.840781
0.788769	0.624992	1.78207	1.05121
1.12941	0.562897	1.797	1.30433
0.908827	0.7787	2.44441	0.917301
1.1131	0.595686	1.90337	1.02651
1.26048	0.555753	1.88104	1.23185
1.0742	0.417235	1.7022	0.711096
1.32537	0.785455	2.14237	1.02949
1.05113	0.575204	2.74279	0.811263
1.06542	0.585962	1.62294	1.16628
1.1603	1.00737	2.90829	1.04016
0.858135	0.577054	1.67139	1.38816
1.48283	0.745092	2.44028	1.02987
0.871561	0.811017	1.71756	1.05871
1.40175	0.714067	3.04457	1.05977
0.985337	0.795785	1.95161	1.31077
1.29224	0.596677	1.4339	1.35672
1.28092	0.678306	2.44523	1.57649
1.81895	0.701757	1.87545	1.5612
1.18591	0.557689	1.9761	1.19349
1.09481	0.625378	1.93393	1.1362
1.25119	0.538021	2.16423	2.01524
1.40924	0.445246	2.2209	2.58597
1.05393	0.732912	1.89649	2.91341
1.06094	0.611134	2.5973	1.56898
1.61739	0.61492	1.58313	1.65464
1.37637	0.734073	3.71879	1.24569
1.60719	0.61152	1.84804	1.07467
2.21858	0.442622	1.26268	1.16811
1.67156	0.601149	1.15604	1.39835
1.11241	0.487762	0.908441	1.44228
1.67298	0.544263	1.28066	1.50275
1.1878	0.668924	1.78353	1.38903
0.676329	0.45992	1.48855	0.977577
0.728007	0.792296	1.80793	1.32173
0.752019	0.571285	2.87421	1.23867
0.930559	0.495939	1.66928	1.31491
0.907105	0.55855	1.55581	1.19503
0.803487	0.840536	1.65207	0.841743
0.673876	0.762218	1.68215	1.44584
0.829993	0.673443	1.59785	0.753488
1.57478	0.5005	1.49513	0.985649
1.14283	0.529114	1.71025	1.16878
0.9337	0.653433	1.7167	2.01225
0.596505	0.862265	1.71068	1.54274
1.06792	0.589317	1.35304	1.94083
0.932795	0.654725	2.07447	1.31308
0.909	0.796471	1.83366	1.35124
0.845055	0.782527	1.61597	1.21098
0.6552	0.777278	1.63533	1.57494
0.786747	0.548393	1.86478	1.25626
0.853532	0.672196	2.17391	1.29443
0.768115	0.486298	1.85316	1.41373
0.680586	0.524856	1.8396	0.899418
1.06456	0.57021	2.69963	1.77365
1.21655	1.46566	2.09955	1.20878
1.16642	0.651587	1.80066	1.25434
0.759249	0.827757	1.91508	1.29645
0.630844	0.620517	2.23218	1.4742
0.833695	0.890885	3.4106	1.30404
0.734807	0.71665	2.01095	0.962964
1.34216	0.69195	2.66964	1.20896
1.2752	0.97088	2.89448	1.78355
1.7905	0.997086	3.1346	2.21163
1.52732	0.614017	2.23145	1.16215
1.4101	0.50898	1.41148	1.29462
1.46643	0.453554	1.66627	1.05813
1.49608	0.553259	2.455	1.35172
1.512	0.45932	1.84304	1.23473
1.06297	0.607951	1.60641	1.6657
0.899059	0.563714	2.60406	1.84767
0.8735	0.488237	3.36305	2.02302
0.884385	0.465731	2.57308	1.62147
0.855513	0.431478	2.37487	1.54572
1.23002	0.628519	1.73465	1.36182
0.795224	0.666646	1.33914	2.10223
0.764929	0.541555	1.6568	1.5535
1.08788	0.613587	1.79274	1.35201
1.28695	0.747331	1.30601	1.01747
0.929095	0.433845	1.99654	1.38595
0.843591	0.399465	2.24444	1.0814
0.928106	0.559756	1.41871	0.856926
1.34534	0.599516	1.05866	0.837312
1.1946	0.633083	1.44633	0.74464
1.202	0.929612	1.51858	0.927967
1.18432	1.148	0.708212	1.22992
1.0609	0.759724	1.63378	0.882981
1.15109	0.816783	1.58163	1.41392
1.51424	0.76136	1.11065	0.748394
1.47319	0.654597	0.926856	0.791264
1.58808	0.685925	1.10922	0.917394
1.09468	0.640396	1.75952	1.41767
0.939466	0.594783	1.69389	1.25059
0.897426	0.546029	0.862481	1.15638
1.02028	1.89077	1.4487	1.24184
1.20329	0.656533	0.88619	0.754158
1.48136	0.450799	1.17984	1.18906
0.883955	0.888949	2.36407	1.13638
1.12566	0.819624	1.62965	1.16032
0.915024	1.14141	0.916657	1.57936
0.937703	0.922812	1.76761	1.53505
1.39995	0.751416	1.77221	1.29722
1.32628	0.634585	1.13285	1.66684
	0.507599	0.871689	1.58484
	0.748147	1.37284	1.87863
	0.686997	1.31289	1.42719
	0.764368	0.938302	1.97793
	0.791738	1.62978	1.7178
	0.70929	1.92536	1.67588
	0.790102	3.25762	1.24251
	0.700382	1.71834	0.940756
	1.01103	1.18672	0.970844
	0.913646	1.32012	1.17407
	0.793329	1.83358	1.47698
	0.487032	1.32017
	0.542368	0.936711	1.47081
	0.627916	1.8961	1.44761
	0.683125	1.45967	1.38182
	0.698918	1.70375	2.13155
	0.66759	1.74648	1.90215
	0.724952	1.11533	0.829571
	0.693366	0.806109	1.19022
	0.645645	0.772845	0.953747
	0.664752	1.16723	1.14708
	0.643795	1.4623	1.82971
	0.50235	0.885029	2.20322
	0.638501	0.717422	1.24403
	0.707826	1.07377	1.29686
	0.831498	0.889118	1.01725
	0.63123	0.679856	1.49663
	0.753655	1.32856	2.15072
	0.619567	1.248	1.5793
	0.709417	1.24305	1.85204
	0.586606	1.29899	1.47113
	0.631702	1.43037	1.52647
	0.753008	0.938647	1.18085
	0.854821	1.63894	1.79726
	0.679984	1.63503	1.14535
	0.680156	1.27954	1.73321
	0.778483	1.30734	3.14368
	0.633941	1.71967	1.41928
	0.539657	1.63697	0.628381
	0.52692	1.72952	1.60936
	0.88546	1.38338	1.27627
	0.85689	1.29508	1.07236
	0.42894	0.717853	1.11506
	0.722974	0.972213	2.16128
	0.861923	1.13504	1.78048
	0.627875	0.929525	1.31232
	0.652231	1.71248	1.02497
	0.614406	1.31272	1.4171
	0.615392	2.01182	0.991319
	0.818244	1.25007	0.895252
	0.856285	0.896392	1.00875
	0.516593	1.24181	1.68397
	0.620559	1.92661	1.82154
	0.548437	1.40886	0.974325
	0.54439	3.11127	1.60707
	0.878877	2.29552	0.691889
	0.643365	1.9699	1.57287
	0.565174	2.72837	1.62744
	0.598438	2.08071	0.783056
	0.755288	1.38992	1.33095
	1.1699	1.50077	1.55108
	1.1004	2.00114	1.5769
	0.8386	2.15846	1.64977
	0.712648	3.12345	2.15997
	0.871003	1.92902	1.6574
	0.389007	2.80316	1.62428
	0.507385	2.0814	1.60402
	0.691519	2.99082	0.966163
	0.905342	1.68408	1.17857
	0.579162	1.68241	2.59219
	0.706837	2.93269	1.29642
	0.985079	3.18524	1.58256
	0.797032	1.59397	1.95563
	0.597108	1.94115	0.927495
	0.598613	3.28546	1.16354
	0.911624	1.64131	1.19283
	0.940069	2.21273	2.24352
	0.718328	1.93479	2.62313
	0.504547	1.77815	1.46405
	0.745609	1.8992	1.23041
	0.454587	1.33789	1.65871
	0.432684	1.91581	1.72809
	0.538283	2.79671	1.7929
	0.448735	1.95011	2.58315
	0.493487	2.46076	2.41595
	0.404842	2.05115	1.69139
	0.360046	1.36191	1.63834
	0.460912	1.26948	1.02052
	0.539099	1.79549	1.26854
	0.366542	1.68249	0.614664
		1.45731	1.27061
		1.22735	2.50744
		1.26371	1.48083
		1.4978	1.56481
		1.78732	1.91631
		2.72898	1.34805
		1.5046	1.13968
		1.33699	1.53104
		1.2499	1.31221
		1.6698	0.676745
		1.1122	1.01616
		1.19413	1.18706
		1.78147	1.56503
		1.81318	0.988929
		1.38708	1.98918
		2.62829	1.05679
		2.49631	1.22813
		1.42241	1.29054
		2.14487	0.930756
		2.53426	1.38639
		1.39375	1.05265
		1.50886	1.63125
		2.30921	0.927164
		2.72119	1.05744
		1.55947	1.59357
		1.99783	2.11226
		1.76834	1.52592
		2.13945	1.16136
		2.21458	1.15416
		1.26961	1.40469
		2.09159	1.15395
		1.27959	1.12737
		1.38063	1.4646
		3.12138	1.58235
		0.975699	1.50392
		2.14474	2.52215
		1.78172	1.62734
		1.47409	1.77395
		1.19197	1.21832
		1.49001	3.22689
		0.950568	5.05694
		1.13647	1.98449
		1.17429	1.29174
		1.06955	1.39162
		3.0339	1.10798
		1.96736	0.711603
		2.29445	1.02455
		1.35322	0.842859
		0.837439	1.40883
		0.719575	1.58474
		2.15989	1.29239
		1.37507	0.964525
		2.23459	1.85434
		1.70581	1.20275
		0.79316	1.03042
		1.33501	0.831856
		1.57048	1.49597
		1.36096	1.31298
			1.13195
			1.63104
			1.18042
			1.68812
			2.18078
			2.11575
			1.98058
			2.33338
			1.95639
			1.77841
			1.74356
			1.53878
			1.44597
			1.15057
			0.852119
			1.83146
			1.42691
			1.04503
			1.13445
			1.76109
			1.05254
			1.49455
			1.36395
			1.19959
			1.48747
			1.44271
			1.38116
			1.90237
			2.17359
			1.16778
			1.2083
			1.30579
			1.88287
			1.27584
			1.18488
			1.22562
			1.31505
			1.52527
			2.30092
			2.00781
			1.5062
			0.87913
			0.762688
			1.0228
			0.717811
			1.19261
			1.3925
			0.941436
			0.921828
			0.794608
			0.764545
			0.910396
			0.808873
			1.53475
			0.860288
			1.94758
			0.834472
			0.653115
			1.11093
			0.719337
			0.960278
			1.18902
			1.06234
			0.726417
			0.985877
			0.847759
			1.35665
			0.974002
			0.708011
			1.28684
			1.38455
			0.768137
			1.41439
			1.43716
			0.966269
			1.04056
			1.36744
			1.70598
			1.38759
			0.735894
			0.791887
			1.17879
			1.09774
			2.20572
			1.47876
			1.09186
			1.07585
			1.19164
			0.9862
			1.3609
			2.2811
			2.38469
			1.41351
			1.51231
			1.41308
			1.63724
			1.40763
			0.9276
			1.29457
			1.0472
			1.14294
			0.839695
			1.39444
			1.2554
			1.69527
			1.80776
			1.51686
			2.23373
			2.70307
			1.81882
			1.52013
			2.48804
			1.25893
			1.66816
			1.7575
			0.807445
			1.26887
			1.36621
			1.40489
			1.55981
			0.964036
			1.56794
			0.994631
			2.3574
			1.13195
			1.23733
			2.46003
			1.6306
			1.5095
			1.19735
			0.887396
			1.50882
			2.07511
			1.24929
			2.09009
			2.21036
			2.29277
			2.46024
			1.31311
			1.45262
			1.69217
			1.70018
			1.59006
			1.14034
			1.12631
			1.47159
			1.3431
			1.84334
			2.34866
			1.37817
			1.16387
			2.85398
			0.909258
			0.529289
			2.48262
			1.22016
			1.11202
			2.08174
			2.10407
			1.28854
			2.51485
			2.9558
			2.94822
			2.46537
			1.19654
			1.31733
			1.18229
			1.92071
			2.52703
			1.92881
			2.11436
			2.66718
			2.81216
			3.4464
			1.54901
			1.28243
			1.79468
			2.58418
			1.11478
			1.99469
			1.85475
			1.20785
			1.53145
			1.0649
			1.15049
			1.2252
			0.90405
			1.13362
			0.914118
			1.29831
			0.848669
			1.72109
			1.63873
			1.74622
			1.19697
			3.69439
			2.69352
			1.87282
			1.5176
			1.55637
			2.37724
			1.56721
			1.22481
			2.92787
			1.34758
			1.94369
			1.58946
			1.37309
			1.70526
			1.53748
			1.25119
			1.15049
			0.950526
			1.51958
			1.67832
			1.30149
			1.3394
			1.19929
			1.63838
			1.82407
			1.35279
			1.30515
			1.35304

## Sheet: Fig. 11 D FM unloading
	sec	Pclowt/wt
	1	39.37	49.746	42.069	26.234	27.758	67.582	41.731	24.228	26.508	31.262	41.6	158.647	134.891	120.945	118.288	115.306	81.16	127.561	112.446	137.161	146.482	145.686	120.314	112.341	69.298	104.341	156.18	149.973	95.77	134.73	190.203	292.41	154.801	294.945	161.809	155.422	152.852	208.523	119.926	192.012	197.496	115.406	118.715	76.757	108.778	121.521	78.747	126.312
	2	40.904	47.588	44	25.762	25.992	65.489	40.579	24.308	26.439	33.667	38.699	156.514	131.539	122.834	116.619	113.04	84.845	118.763	108.88	136.463	141.18	144.741	119.455	115.302	67.624	103.58	157.718	152.152	100.508	132.102	189.656	293.801	156.844	298.672	157.934	158.336	155.406	204.82	122.41	191.613	198.285	112.132	116.965	75.295	107.792	120.24	73.674	122.122
	3	40.996	49.16	41.957	24.653	28.061	68.368	39.718	24.551	26.424	29.942	35.938	151.208	132.574	124.634	116.838	114.519	81.353	120.406	110.175	132.235	145.678	144.612	119.682	109.118	70.235	110.424	156.443	146.219	97.824	128.5	180.664	290.785	151.199	297.715	160.773	151.559	156.5	203.637	118.32	192.152	194.602	113.073	120.712	75.944	107.115	119.299	81.146	123.49
	4	41.533	47.152	43.484	26.387	28.157	68.053	40.406	24.062	25.181	32.082	39.501	156.58	129.071	119.612	118.197	110.836	83.038	121.958	107.073	126.424	137.737	139.851	113.761	113.004	70.718	109.169	154.259	149.836	95.055	125.398	184.617	292.449	153.645	293.613	161.102	151.324	156.898	222.109	114.086	182.773	191.484	112.059	120.698	77.014	103.677	118.75	79.573	121.222
	5	41.634	44.505	41.157	23.573	26.144	64.849	39.523	22.366	26.536	31.054	38.778	157.035	126.654	120.244	120.796	113.106	83.785	121.783	107.253	126.886	137.961	140.396	114.18	115.973	65.208	111.816	153.898	145.5	93.781	127.871	185.172	292.152	153.824	290.02	153.223	146.652	152.91	220.191	119	184.227	193.266	109.253	116.931	77.444	103.056	119.472	80.281	122.625
	6	40.736	46.493	41.686	25.274	26.817	63.446	38.067	24.308	26.305	29.879	34.862	153.541	123.956	122.357	114.707	111.264	83.676	119.466	107.778	125.008	132.976	140.702	115.067	113.227	67.184	103.4	152.118	145.477	93.281	123.625	182.672	290.137	161.027	291.602	157.98	146.742	145.723	217.406	120.082	178.277	188.629	109.889	114.535	71.083	104.194	115.167	75.41	115.788
	7	42.033	46.36	40.794	25.856	26.148	64.539	39.009	22.796	27.107	30.639	33.8	152.306	123.242	121.186	115.9	111.317	83.098	117.095	106.206	130.859	134.976	135.71	108.416	108.49	67.176	107.635	156.969	144.125	91.691	121.164	176.172	275.945	145.227	270.719	154.277	141.812	145.043	201.535	111.719	174.828	178.824	109.222	115.601	70.552	106.413	113.469	74.753	115.642
	8	43.25	43.093	38.49	24.47	29.539	61.956	38.507	22.464	24.91	28.983	34.224	149.455	122.432	120.712	111.763	111.344	83.399	118.064	105.29	131.769	134.118	137.612	110.663	110.902	65.914	99.125	155.635	143.535	87.984	121.938	167.715	273.633	145.469	266.496	146.914	140.043	146.629	206.496	110.965	171.188	176.375	107.497	115.91	74.688	98.003	112.337	73.722	118.365
	9	43.004	42.581	38.45	24.059	27.679	62.964	38.099	21.727	23.865	28.08	32.871	145.698	128.898	122.962	112.583	112.927	81.313	116.965	106.257	129.176	131.227	136.729	110.651	109.392	68.365	96.357	153.843	146.051	89.809	121.035	165.211	274.383	139.969	267.301	147.805	133.805	143.402	198.402	102.66	165.57	174.754	109.049	115.215	72.285	98.833	108.531	68.378	116.33
	10	41.791	43.956	38.935	23.104	28.185	61.518	39.101	22.742	23.303	28.832	30.103	147.945	118.947	122.914	115.231	111.88	81.038	117.16	107.39	121.635	134.525	131.663	108.522	110.969	70.122	102.541	154.973	138.922	90.07	113.574	163.988	259.141	136.023	255.656	141.863	128.371	140.039	201.781	103.109	165.434	169.5	107.156	119.684	71.927	99.743	108.625	72.681	116.771
	11	40.061	42.763	39.179	23.172	26.24	57.383	37.439	22.865	25.559	29.065	31.297	149.922	122.157	117.523	117.803	110.831	79.206	119.386	104.541	120.596	134.004	133.906	109.624	110.075	63.984	104.388	149.196	139.027	83.727	111.617	156.445	257.93	134.305	254.496	144.652	128.355	137.875	195.508	102.527	165.465	166.129	105.854	111.601	72.868	98.934	106.837	68.861	112.941
	12	41.917	40.592	37.736	24.851	26.807	57.081	37.101	22.441	24.779	29.51	30.495	146.945	119.503	120.326	116.319	111.024	79.295	120.659	102.437	128.573	134.957	133.392	109.31	112.004	62.733	105.447	151.278	151.352	84.98	113.668	163.934	264.465	136.539	257.828	138.422	126.75	133.895	187.402	98.766	159.215	164.266	101.097	109.337	71.396	93.59	105.003	69.774	112.649
	13	41.892	41.798	37.647	23.896	28.152	56.741	34.66	22.469	24.318	29.512	31.422	144.271	113.601	119.384	117.92	112.993	82.734	117.765	105.235	124.686	133.686	136.671	113.22	108.906	66.796	106.388	147.2	147.801	82.898	109.203	154.477	252.41	133.832	245.848	138.773	124.254	129.723	186.355	92.047	150.066	154.555	102.653	110.101	73.944	92.701	104.038	67.667	104.469
	14	41.425	40.33	37.486	21.375	28.378	55.293	34.703	23.054	23.004	30.467	32.108	142.584	117.827	121.33	118.592	107.55	78.235	121.047	106.388	125.478	129.906	127.616	106.553	104.22	65.184	100.635	152.267	146.875	77.406	113.441	146.57	253.426	134.293	243.965	132.996	121.098	123.859	184.273	90.336	154.816	154.5	100.243	109.882	69.455	94.385	101.67	68.399	108.118
	15	41.409	40.497	38.305	20.899	26.47	56.221	35.221	20.781	23.103	29.361	31.998	139.063	123.18	121.419	114.492	110.388	80.197	121.182	104.636	125.49	134.031	132.627	106.749	107.114	62.42	99.231	146.439	141.555	75.707	111.922	147.816	249.383	130.957	236.012	129.977	117.867	121.598	183.875	87.477	149.957	150.562	102.309	109.059	70.479	97.517	102.632	67.653	108.156
	16	40.919	39.415	38.028	23.375	26.413	58.037	34.404	20.662	23.411	28.63	30.658	143.22	114.051	117.195	114.559	109.457	78.18	114.293	100.945	122.012	127.875	127.82	106.8	108.902	63.694	98.898	149.482	148.875	77.715	107.68	141.113	245.359	131.93	235.465	128.312	116.32	118.777	173.508	86.027	145.465	141.262	105.264	108.521	69.021	97.201	101.875	65.667	106.115
	17	41.183	38.579	36.407	21.264	26.226	53.694	34.344	20.108	21.929	28.17	29.178	139.898	113.951	115.874	119.049	105.885	76.251	117.661	102.84	129.149	129.655	123.294	105.788	109.49	61.89	99.718	146.267	142.406	76.336	104.336	137.094	237.305	128.832	229.949	125.891	110.949	115.594	172.605	89.914	141.914	140.305	101.247	107.167	69.823	98.316	101.944	67.778	104.757
	18	41.484	40.062	38.464	21.177	26.516	54.253	32.778	22.492	25.802	26.488	29.677	141.847	119.111	118.481	113.514	107.018	78.67	116.047	105.647	117.392	128.263	125.157	102.812	103.384	61.686	94.843	150.345	137.543	72.34	100.805	137.781	233.273	128.699	226.18	122.516	107.172	115.887	173.922	83.547	138.938	131.77	99.743	106.302	69.66	92.927	97.854	64.583	107.111
	19	39.585	39.23	36.142	22.021	26.394	54.438	35.763	21.318	23.882	27.28	28.067	138.204	117.938	116.798	114.887	106.654	80.339	115.825	104.264	119.733	131.957	132.118	108.941	111.514	63.094	103.533	143.937	143.934	70.043	103.371	134.438	231.367	128.273	215.918	123.715	101.25	116.891	169.695	80.562	138.02	134.242	98.24	108.441	68.858	97.045	98.056	67.556	103.368
	20	41.589	37.426	35.836	20.354	27.789	53.899	33.187	20.65	20.551	25.688	26.082	134.584	116.477	118.499	117.543	104.41	79.364	116.013	108.033	122.792	129.2	128.796	103.11	104.749	64.329	100.31	151.906	139.543	69.207	99.457	133.484	229.668	122.734	214.441	116.805	100.754	107.523	167.145	82.945	129.828	127.262	100.705	109.215	71.455	94.66	98.101	65.295	101.01
	21	38.886	36.77	36.15	20.24	26.685	52.331	33.11	19.68	21.836	27.198	26.361	139.522	119.024	118.661	117.9	107.929	80.306	114.636	103.253	124.392	131.741	123.173	106.408	110.29	62.627	97.314	147.325	142.41	69.5	103.062	135.219	216.879	116.355	205.859	117.188	100.613	108.715	166.77	79.383	134.012	126.086	98.455	108.288	68.622	91.736	96.75	63.396	104.979
	22	38.283	35.81	36.396	20.332	27.512	51.247	32.591	20.159	23.376	26.65	28.807	134.306	117.537	116.257	113.058	107.854	82.987	114.576	106.284	125.639	127.475	125.702	103.906	108.541	62.792	96.992	148.075	142.785	69.797	101.434	127.559	215.812	116.668	206.609	114.688	101.863	106.035	163.098	77.539	128.43	124.012	97.431	103.66	64.156	91.285	92.969	63.469	100.906
	23	40.301	37.022	36.138	22.526	26.305	52.775	33.987	18.951	22.393	28.536	24.935	132.039	110.902	116.96	116.725	104.348	81.397	119.559	105.565	126.341	125.929	123.153	102.302	108.055	59.925	94.161	144.725	140.805	72.195	97.477	126.219	218.93	120.719	207.602	115.82	101.914	103.316	157.27	76.738	123.422	122.152	96.875	101.5	68.628	92.361	94.156	63.545	100.885
	24	40.646	36.395	36.331	21.049	25.494	52.465	32.256	19.95	22.662	26.464	27.148	130.616	109.69	117.8	114.37	105.982	80.851	115.769	105.426	124.157	124.286	122.294	104.047	112.788	58.549	94.698	146.2	140.254	69.871	101.777	120.898	214.227	113.75	205.227	112.598	94.781	105.664	157.582	71.543	127.633	119.332	95.931	104.056	66.413	89.663	96.712	62.205	100.368
	25	41.738	35.916	36.374	19.28	27.132	49.978	32.809	20.492	22.305	28.469	25.834	136.631	108.665	118.774	116.506	99.228	78.341	114.062	105.927	116.424	131.216	120.008	100.357	115.239	58.686	95.925	144.98	142.793	63.082	99.207	118.109	210.773	109.059	194.914	110.586	93.184	98.602	154.352	72.621	125.891	116.898	95.545	105.253	67.174	91.604	94.618	62.889	98.198
	26	42.022	36.402	34.2	21.67	27.437	50.816	32.357	19.621	21.295	27.267	24.563	130.882	110.324	118.661	116.466	100.472	80.479	118.392	106.118	120.22	124.494	124.431	102.8	106.624	61.573	104.824	143.918	142.152	74.473	95.336	118.836	211.074	112.566	196.043	103.934	94.398	100.074	157.348	71.32	123.777	116.871	94.448	104	67.528	86.885	88.295	61.201	95.899
	27	39.14	36.201	34.692	21.705	27.287	51.082	31.275	19.622	22.157	28.955	25.699	135.039	116.051	116.69	115.568	101.978	77.441	115.472	104.428	119.439	126.992	118.494	95.31	110.573	61.02	90.267	143.729	137.977	66.418	95.715	118.973	205.551	106.473	192.219	107.406	88.688	94.605	150.953	70.883	120.051	110.457	92.944	104.493	63.288	89.462	91.92	58.135	97.017
	28	40.669	34.953	34.366	19.911	27.026	50.721	33.424	18.602	21.757	26.099	24.273	130.369	107.585	112.973	111.887	99.843	78.701	117.953	106.909	122.616	124.278	120.757	103.314	113.314	61.506	92.867	142.298	141.93	63.758	95.34	116.074	202.207	102.75	186.785	109.773	91.133	103.359	156.055	67.684	122.855	110.652	93.951	103.035	65.458	87.215	92.819	58.205	96.385
	29	40.303	34.324	32.836	22.503	25.801	46.866	31.714	19.237	20.308	27	25.553	132.604	106.585	115.224	113.264	101.845	79.322	118.849	106.973	117.631	123.753	119.333	100.604	108.008	57.659	97.725	139.38	137.211	64.316	90.539	113.871	201.93	103.438	189.391	104.434	87.082	96.109	153.43	66.035	120.949	107.309	91.597	100.747	64.608	88.67	91.319	58.233	99.069
	30	37.628	34.587	36.265	22.295	25.14	46.256	32.574	20.563	21.501	27.837	24.275	135.843	112.146	114.375	112.761	98.568	75.193	117.051	106.013	116.086	122.69	117.243	95.557	103.314	54.357	93.051	139.588	136.477	64.977	93.531	109.23	195.855	102.289	184.328	101.648	82.844	93.766	148.09	71.48	120.105	106.316	90.938	105.014	67.469	86.09	94.604	56.708	97.372
	31	39.522	34.246	33.65	19.998	25.606	47.306	31.413	18.664	20.028	24.318	24.759	130.902	114.993	112.605	108.49	100.027	75.789	113.548	100.962	116.58	126.345	116.6	96.325	109.949	55.486	89.435	144.329	137.172	60.629	87.031	107.359	194.66	104.309	182.637	98.414	84.883	91.805	151.914	63.762	118.812	101.438	91.677	100.507	64.33	87.33	89.944	58.149	95.885
	32	40.01	33.95	32.858	21.017	25.419	45.703	31.028	20.095	21.064	26.247	22.847	129.502	106.94	112.843	112.333	99.78	75.295	113.448	102.523	119.831	120.89	118.314	104.133	106.227	59.71	91.278	139.769	138.574	58.465	85.52	109.477	186.008	97.27	176.812	98.953	76.301	93.602	148.438	64.008	111.086	98.379	91.632	100.792	64.483	84.986	89.306	59.865	97.16
	33	42.823	33.316	34.129	21.377	29.746	46.293	30.867	17.834	21.862	24.993	23.282	132.431	109.774	112.996	114.047	98.661	77.047	112.552	101.789	119.992	125.067	113.518	94.961	110.855	59.051	86.906	141.169	137.426	54.598	88.543	109.137	186.129	101.383	180.762	98.184	75.16	92.543	139.406	64.191	113.055	94.742	90.042	100.219	63.944	85.476	90.326	58.934	93.392
	34	38.197	34.163	32.321	23.161	26.77	46.94	30.394	18.264	21.052	25.368	23.905	131.004	106.435	116.091	116.843	95.284	74.266	113.59	107.082	114.098	125.576	115.4	98.525	103.282	53.557	92.239	142.627	134.121	54.828	86.766	106.988	184.297	100.098	175.809	104.074	74.508	90.262	149.824	65.328	106.172	94.559	88.434	101.906	63.573	87.427	89.712	54.941	95.83
	35	38.685	31.799	32.164	20.609	25.866	45.486	31.189	18.436	21.28	23.34	26.49	129.059	111.195	115.869	116.86	98.525	77.264	108.978	103.592	113.043	118.38	116.655	98.447	107.004	58.137	85.655	141.898	137.766	56.168	87.332	103.391	178.75	93.031	168.793	91.918	79.48	88.387	143.016	63.848	109.223	93.789	88.694	99.062	64.406	88.427	87.507	54.351	92.045
	36	38.339	32.41	34.015	22.405	25.581	45.147	30.196	19.213	21.594	24.907	23.69	129.976	111.186	112.659	113.47	97.082	76.871	114.532	106.051	118.42	124.816	111.314	95.58	103.984	56.78	93.302	137.569	131.926	58.133	84.898	109.637	181.168	96.102	174.09	96.887	77.109	84.484	141.664	61.383	107.477	92.57	89.979	98.816	62.823	86.938	89.684	54.41	91.618
	37	38.299	32.5	31.935	20.729	25.437	44.574	31.127	18.68	22.108	23.077	23.708	129.847	103.448	112.645	109.33	99.867	77.115	111.574	103.246	116.765	119.125	113.525	97.196	107.71	55.192	86.212	139.925	135.547	54.938	82.656	104.074	171.664	92.836	168.336	94.121	77.148	83.371	141.211	60.836	103.02	89.57	87.517	100.83	61.365	87.517	89.427	53.059	93.455
	38	36.61	32.529	33.105	19.656	26.071	44.62	30.776	16.85	22.15	23.007	22.364	128.365	115.419	115.541	112.494	97.789	75.215	112.177	103.534	113.051	121.655	109.808	96.486	102.984	57.486	88.325	138.812	138.531	53.328	85.543	103.824	176.816	92.523	165.891	95.34	71.91	86.48	138.16	61.523	104.941	91.238	86.767	102.132	63.17	83.153	86.694	53.733	91.549
	39	38.278	31.6	34.194	18.479	24.805	43.333	30.256	18.622	19.329	24.157	23.793	121.984	108.459	113.439	113.849	100.113	77.319	116.69	104.131	117.118	118.294	115.349	98.02	107.082	54.596	87.153	137.482	132.328	53.043	84.543	107.172	175.012	95.012	164.742	90.816	71.141	83.5	143.621	62.43	104.219	94.008	86.358	99.625	62.858	84.927	89.559	53.806	92.562
	40	35.892	31.477	32.234	20.238	24.799	43.855	28.864	19.342	20.69	24.65	22.228	126.114	111.61	112.33	112.721	96.889	76.552	113.37	102.293	106.035	123.141	117.82	96.937	99.961	53.722	85.89	138.384	130.441	50.043	78.871	103.684	167.586	87.777	158.328	93.32	73.977	83.734	135.027	62.293	99.684	91.289	87.955	99.326	60.934	81.816	85.767	50.823	91.444
	41	36.425	31.121	31.368	18.25	27.425	43.606	29.239	19.981	21.017	22.531	25.331	125.325	107.568	113.492	111.836	98.528	74.364	115.133	102.867	114.588	124.239	113.42	97.086	100.996	54.443	91.792	139.047	133.035	50.438	79.539	99.227	165.449	91.125	159	94.352	74.184	82.758	134.988	55.453	101.043	85.168	85.281	98.712	60.976	83.247	86.236	52.503	87.104
	42	35.742	31.67	31.664	18.03	26.726	42.586	28.391	19.064	19.935	23.312	20.626	123.651	110.59	110.51	110.69	99.681	72.599	110.809	100.996	112.184	117.878	110.075	93.592	104.078	54.753	87.945	134.643	132.727	56.055	82.73	98.789	166.418	89.16	158.723	90.059	72.66	78.883	133.32	56.996	100.539	86.223	87.101	93.58	58.799	84.562	87.427	52.01	90.601
	43	33.661	32.063	30.763	19.627	25.25	42.508	29.733	20.041	21.262	25.948	19.424	125.341	106.563	106.792	107.244	94.663	74.288	114.357	103.069	110.522	114.298	113.059	95.29	105.988	51.051	84.184	138.133	129.762	49.859	70.809	98.398	164.539	93.062	157.18	89.246	70.086	80.727	133.711	57.141	99.129	82.754	86.427	95.969	56.951	83.247	88.389	52.542	89.913
	44	34.654	31.029	29.538	18.403	25.498	41.909	27.963	18.847	20.987	22.331	21.069	123.788	108.521	111.896	113.774	95.563	73.042	112.84	102.288	117.169	122.012	111.529	95.098	103.753	58.58	82.714	136.604	126.438	52.785	76.016	96.07	163.707	89.699	152.52	87.684	65.969	76.895	134.777	59.562	96.188	86.676	83.028	97.122	58.538	82.972	85.472	52.729	87.17
	45	38.14	32.006	31.721	19.356	26.758	40.718	28.415	18.443	19.88	25.407	21.637	126.173	104.898	109.701	110.942	92.583	75.195	109.359	102.772	115.286	121.937	111.918	91.235	106.153	51.384	83.322	137.031	130.387	49.898	73.027	96.723	160.914	89.168	153.363	84.66	65.941	77.547	126.93	57.824	91.738	81.98	85.42	97.535	60.573	81.528	84.233	53.354	87.868
	46	39.264	29.431	31.443	19.873	24.931	42.065	27.336	18.791	20.329	24.129	21.979	124.4	107.135	107.388	109.055	92.858	74.149	109.053	100.375	103.737	117.302	109.196	91.008	104.796	53.62	87.588	135.969	131.926	48.711	66.906	92.199	158.312	86.656	151.922	88.488	69.887	81.711	125.711	58.305	90.773	79.293	84.153	93.924	60.059	80.642	85.528	51.156	86.889
	47	35.1	29.769	31.611	19.75	25.793	43.925	27.333	17.622	20.258	22.437	21.841	124.827	102.721	109.315	110.967	92.548	74.155	108.308	101.295	109.996	117.055	108.847	90.878	103.251	47.247	81.894	133.855	128.711	49.605	76.559	93.113	156.566	90.52	147.688	84.418	63.539	78.285	128.77	53.434	92.77	81.441	84.649	92.51	60.167	80.01	85.34	52.003	88.903
	48	37.362	30.33	29.755	18.365	28.358	40.821	27.772	18.028	20.041	24.351	21.817	122.404	101.863	108.678	106.067	91.794	69.337	107.326	99.557	114.612	120.247	107.827	91.035	104.973	51.227	85.706	132.937	133.406	49.422	74.762	93.496	156.566	88.094	148.832	85.16	65.469	81.438	131.461	55.07	89.039	74.957	85.385	99.49	62.59	83.017	84.549	49.66	86.188
	49	38.496	32.23	30.828	19.043	25.555	40.898	28.527	18.163	21.097	22.733	19.402	123.067	105.705	108.151	109.217	91.605	69.965	106.02	99.472	111.286	116.18	100.357	91.522	104.216	50.086	85.624	135.498	131.188	46.844	67.422	94.805	149.992	85.91	143.75	85.906	59.188	73.215	127.426	59.297	94.586	81.156	81.747	93.365	57.899	81.101	80.941	49.5	84.361
	50	35.813	29.63	30.538	18.983	25.762	40.287	27.501	17.249	18.323	23.897	22.391	124.271	108.042	110.525	105.43	94.572	72.322	107.235	98.131	107.137	113.996	102.459	91.584	100.655	48.973	83.671	130.612	130.289	45.559	63.906	90.883	148.625	82.094	143.266	85.922	65.652	72.973	131.879	52.844	89.766	76.367	84.736	93.733	57.615	81.76	84.073	47.934	85.201
	51	35.949	32.66	31.643	19.156	24.886	40.265	27.77	17.738	19.645	23.065	17.523	122.341	108.916	106.743	105.854	90.468	73.22	105.339	97.661	108.78	114.369	103.718	89.035	107.082	50.22	79.196	132.965	130.359	45.641	65.535	84.746	154.125	85.781	148.719	83.727	64.242	72.332	127.66	54.086	91.363	74.035	82.25	96.868	57.045	81.948	81.462	47.538	84.149
	52	35.768	30.393	29.563	18.776	25.577	39.413	25.884	16.385	19.312	22.493	20.671	119.522	98.721	113.082	104.827	88.818	69.552	105.86	98.166	107.91	114.718	106.882	89.475	103.996	46.875	78.482	135.02	125.715	44.352	70.457	82.109	147.277	86.367	136.777	78.035	61.938	73.039	129.285	52.195	89.324	73.754	84.948	92.736	57.042	79.59	85.142	47.299	85.733
	53	35.593	28.042	29.464	19.889	24.25	40.592	26.079	16.267	18.69	22.262	20.815	121.612	108.366	105.987	109.231	88.619	68.468	107.206	100.625	106.125	110.157	101.208	90.298	105.067	50.278	83.282	128.706	126.195	42.672	66.699	82.594	146.699	81.453	140.707	77.133	58.895	67.562	124.148	54.922	87.258	73.871	82.347	93.451	56.837	80.5	80.705	45.194	84.413
	54	36.183	30.664	30.972	19.434	26.122	40.311	25.895	17.342	21.323	23.342	19.436	124.38	106.765	105.741	111.552	90.501	72.807	110.483	97.071	103.875	115.149	105.549	93.729	106.118	47.314	83.816	134.145	121.367	44.844	66.504	84.414	149.762	84.848	140.426	77.719	62.543	70.777	129.535	53.031	89.066	72.734	81.194	95.573	58.153	78.576	79.212	53.035	84.569
	55	36.587	29.132	29.247	19.363	25.48	41.467	25.548	17.88	20.475	22.731	18.589	124.475	110.109	108.18	107.164	91.133	70.971	106.324	99.749	108.898	117.361	105.506	90.004	105.478	51.149	81.349	133.882	123.73	41.34	64.172	83.383	148.582	85.102	138.855	78.289	63.113	70.875	121.898	50.344	89.152	70.656	81.441	93.892	55.306	76.882	82.215	44.962	81.365
	56	35.37	30.752	32.505	18.156	26.187	38.117	27.045	17.178	17.993	24.624	19.785	119.631	112.129	107.965	108.18	91.286	70.672	106.357	100.29	108.145	112.086	102.957	90.792	100.467	49.22	79.549	133.584	123.375	45.137	59.855	83.848	144.637	85.523	138.375	75.465	62.043	72.352	120.188	49.238	81.844	76.723	78.601	96.219	55.389	78.243	81.191	45.497	84.247
	57	35.335	30.324	30.105	18.924	24.348	38.552	25.409	16.63	17.897	23.574	20.974	115.255	102.858	105.251	108.133	91.204	70.208	107.707	98.683	106.361	116.149	100.851	88.667	106.353	46.741	80.918	131.333	119.535	41.328	58.16	81.258	145.125	83.199	134.273	77.629	62.109	68.871	115.887	53.27	79.641	69.348	78.059	93.639	55.163	78.83	80.969	46.295	81.399
	58	36.874	30.012	30.383	17.859	26.159	39.062	26.295	18.054	20.471	26.333	18.609	120.486	105.082	106.206	101.86	89.67	71.191	108.823	99.326	112.584	111.165	102.612	86.78	104.353	47.957	80.71	131.702	120.902	41.012	60.93	77.434	144.055	83.852	134.062	77.441	58.285	65.902	122.074	47.035	79.672	72.543	83.507	90.677	53.823	77.375	81.903	47.035	82.358
	59	34.35	28.595	30.108	19.101	23.632	40.54	24.981	17.933	19.164	20.258	23.669	120.322	104.989	105.29	105.353	92.747	74.725	110.778	99.277	109.596	109.839	104.071	86.11	109.145	50.455	80.365	136.024	118.328	43.207	60.199	80.793	140.105	81.973	133.742	74.844	58.594	70.582	123.605	51.066	79.293	68.633	79.052	95.67	52.594	76.719	80.896	52.451	82.323
	60	32.984	29.485	28.987	17.344	24.785	36.257	25.166	16.54	19.217	21.174	22.858	117.478	107.098	107.674	110.439	87.098	72.253	109.541	100.608	105.839	108.718	107.545	91.922	106.282	51.373	78.196	129.243	123.91	42.461	60.879	81.707	136.598	76.461	136.578	76.141	57.375	68.348	121.973	51.109	88.012	68.695	78.104	88.392	55.694	75.667	77.288	47.566	82.708
	61	34.669	28.536	30.806	18.306	26.744	38.958	25.379	17.492	19.647	23.566	17.452	116.6	101.093	108.118	106.419	90.202	70.654	108.931	103.776	104.263	112.812	101.498	87.867	102.604	49.165	81.42	129.737	118.453	43.555	58.266	79.523	139.199	85.199	131.895	73.387	54.41	67.316	117.617	46.957	80.34	72.238	77.67	92.073	52.958	76.122	80.045	47.868	80.712
	62	33.632	29.155	30.206	18.174	22.953	38.095	24.679	15.368	18.908	21.578	19.247	117.627	103.645	104.41	106.645	92.541	73.2	106.918	99.386	106.569	114.341	100.278	85.91	105.278	51.859	81.906	131.643	118.57	42.234	54.414	79.352	136.125	84.391	133.215	75.598	55.633	65.824	117.984	50.703	78.449	69.141	78.559	92.236	53.59	76.132	77.09	46.892	82.017
	63	36.173	28.903	29.568	18.389	25.315	35.909	25.361	15.596	19.404	23.475	19.957	118.569	106.925	103.455	110.335	91.639	70.96	105.911	99.951	108.11	108.71	102.722	85.345	102.243	47.506	76.384	130.22	114.148	40.711	58.906	77.285	143.273	81.953	136.738	72.73	57.832	61.93	108.883	47.871	77.043	62.91	79.618	91.927	53.795	75.49	77.167	46.233	83.278
	64	36.673	30.047	28.589	17.535	26.049	38.176	24.864	16.735	18.426	21.665	19.787	116.643	103.273	109.716	106.098	91.734	70.317	109.825	101.275	106.247	111.643	99.051	83.604	104.859	50.365	81.761	128.224	119.121	39.102	56.074	74.504	135.77	78.445	131.367	71.531	53.695	64.262	121.637	47.457	78.168	66.52	76.288	88.26	55.26	75.535	75.826	46.312	78.868
	65	35.646	29.074	28.908	16.983	24.892	38.882	24.884	16.193	19.91	19.359	20.46	120.353	102.08	104.712	103.636	90.432	75.576	106.08	100.169	106.553	111.765	104.506	89.055	106.176	46.247	78.09	132.49	117.816	39.969	61.879	75.906	134.812	79.016	130.453	74.41	56.922	62.57	119.535	49.84	81.004	62.555	77.288	89.812	52.632	74.014	78.059	46.823	80.583
	66	34.268	28.461	27.847	16.318	24.866	37.145	25.832	15.654	18.179	24.021	18.351	115.071	103.745	105.69	106.271	91.33	72.04	109.761	103.479	103.235	106.725	97.643	82.051	101.91	44.89	82.184	131.769	117.672	38.172	59.156	76.273	136.562	82.477	133.086	72.012	52.09	68.809	115.477	48.531	81.281	67.707	74.083	88.708	48.75	71.031	77.441	47.021	78.292
	67	33.817	27.902	30.441	17.092	24.628	39.605	24.004	16.817	19.176	21.693	17.636	117.694	108.971	107.503	105.37	89.007	67.328	108.856	102.182	107.467	114.388	98.922	87.906	107.306	48.643	77.153	130.341	113.695	37.688	56.066	76.574	133.734	78.062	130.516	68.008	54.484	66.484	117.316	46.969	75.434	65.223	76.389	88.92	51.642	76.007	79.132	44.653	77.934
	68	35.132	29.978	29.252	17.681	24.183	36.561	25.813	14.693	17.181	21.092	20.409	115.686	101.244	104.778	104.31	86.335	70.475	105.275	100.61	102.475	111.247	102.506	87.882	101.008	44.008	73.655	130.851	115.355	37.41	56.184	79.484	136.273	78.207	130.672	75.383	58.156	62.77	114.691	50.836	78.152	62.508	74.934	88.344	53.67	73.875	74.854	44.045	78.312
	69	35.77	26.852	30.191	17.717	23.872	37.284	25.544	16.333	17.996	20.11	19.619	116.529	104.268	105.627	101.605	92.435	73.257	106.035	99.823	101.773	108.992	104.941	87.318	103.067	45.953	77.533	127.349	117.906	38.324	55.934	79.191	135.062	80.203	133.551	66.637	55.301	63.055	115.52	54.125	80.957	62.676	74.993	90.351	49	70.601	77.538	42.892	78.747
	70	32.778	30.268	30.617	16.889	25.819	35.639	23.893	14.37	19.759	20.695	19.901	112.153	102.002	104.419	105.39	90.953	71.395	109.122	104.361	106.035	109.553	95.875	80.549	106.224	47.71	84.369	131.098	113.891	37.012	56.113	76.344	133.754	77.789	130.621	67.867	52.332	67.258	117.305	49.027	79.406	67.965	75.431	86.17	48.49	71.865	72.486	39.045	76.288
	71	34.843	29.022	30.589	17.392	25.102	36.281	25.178	16.88	18.964	21.148	19.63	112.875	107.184	104.293	107.543	85.639	70.211	111.534	102.277	102.788	112.263	105.475	85.145	106.043	46.459	77.584	131.486	120.293	37.965	56.945	73.984	129.684	77.367	128.145	67.062	55.277	64.965	115.496	46.961	77.965	67.637	72.604	84.427	49.556	71.826	71.851	39.247	77.92
	72	34.069	26.478	28.464	17.939	26.136	36.009	25.624	18.772	18.187	20.791	17.456	113.824	105.681	104.838	106.554	87.927	71.956	110.29	101.213	107.475	113.475	102.086	86.306	104.314	48.714	80.043	130.369	113.293	38.906	61.363	70.445	130.129	78.652	126.551	66.547	53.734	65.68	124.078	49.289	80.281	68.258	70.938	84.858	46.976	73.007	71.531	42.087	77.323
	73	34.453	27.881	29.222	16.764	25.665	37.337	24.462	16.95	18.578	21.632	18.23	114.592	105.989	102.94	106.703	88.379	71.521	106.956	102.938	106.012	107.973	98.612	83.302	104.58	47.929	79.82	126.247	116.102	37.648	55.488	71.246	128.312	76.074	124.113	70.844	49.074	68.727	108.621	51.512	79.133	63.555	70.403	83.128	46.59	70.969	72.771	42.941	73.451
	74	33.222	26.806	29.099	18.78	24.222	34.218	24.821	16.675	18.538	23.002	18.394	111.937	111.661	104.976	105.255	90.109	69.322	105.1	103.22	101.043	108.722	98.651	86.765	104.922	47.051	77.408	128.129	111.531	34.102	56.445	76.141	131.766	78.934	126.484	67.816	51.66	66.203	111.656	45.551	80.602	63.449	73.538	85.656	47.774	70.365	76.118	40.569	77.174
	75	33.577	26.102	28.239	17.79	24.15	35.151	25.398	16.387	18.092	22.434	15.08	113.169	104.685	102.364	104.202	86.182	70.565	107.612	100.809	110.224	112.733	98.737	83.741	106.404	47.667	78.208	125.475	110.066	34.477	55.738	67.379	122.035	75.746	121.816	72.801	52.027	65.938	113.328	46.703	78.117	61.758	71.573	81.344	48.16	69.212	72.49	47.396	73.625
	76	36.297	26.615	29.458	16.962	23.148	33.485	24.105	16.585	19.009	21.041	19.45	111.576	102.559	104.264	102.559	88.41	69.967	105.395	101.169	105.196	107.725	92.894	80.494	106.69	46.471	76.627	127.808	110.188	39.5	51.207	72.094	127.242	77.109	123.473	68.539	50.684	65.746	111.82	47.629	79.551	61.449	69.847	82.455	48.524	69.806	75.656	45.872	75.688
	77	34.795	27.633	28.856	16.953	24.709	36.674	24.099	17.899	17.695	22.576	19.57	112.204	110.004	103.437	104.942	87.299	70.337	109.053	97.576	105.553	109.298	91.973	78.733	102.153	45.847	79.408	125.702	108.477	39.953	51.082	72.344	126.828	78.125	121.941	65.926	52.277	62.711	109.426	44.75	74.098	63.562	68.149	83.142	50.684	67.757	72.5	43.583	73.826
	78	32.722	25.96	28.161	17.451	24.033	34.802	24.123	17.176	18.899	22.071	15.402	115.871	110.608	101.984	106.401	88.519	72.377	103.098	96.572	102.973	110.49	96.918	84.729	103.498	45.043	76.063	129.388	113.16	37.996	55.535	69.727	128.762	75.234	129	65.848	48.145	66.066	112.285	47.598	82.008	61.094	69.826	83.882	48.104	68.309	70.101	41.882	74.573
	79	32.073	26.522	29.12	17.365	25.841	35.825	24.744	15.523	18.006	21.017	18.791	113.6	101.293	102.428	103.98	86.031	71.246	107.157	102.379	100.576	109.537	96.655	87.596	107.165	40.678	76.996	126.714	104.383	34.219	51.926	67.047	128.273	76.234	119.508	69.52	52.23	63.023	109.078	45.77	75.902	61.426	69.024	81.882	45.503	69.108	73.163	43.111	75.625
	80	31.691	25.999	27.479	16.087	23.571	35.761	23.903	16	17.766	21.308	19.933	113.204	104.532	101.322	106.661	82.678	68.346	106.399	100.953	101.012	100.475	96.541	84.22	103.106	46.925	73.51	124.533	108.723	34.973	49.711	68.723	123.152	72.148	118.699	70.238	45.527	58.152	109.375	43.496	74.652	60.785	70.368	79.021	42.955	68.441	70.476	41.941	74.465
	81	34.055	26.04	29.837	17.259	24.951	33.345	23.258	16.546	17.819	21.193	19.507	115.318	100.488	104.457	104.463	83.8	69.12	105.676	100.683	102.667	109.459	97.765	81.937	104.125	44.749	72.906	125.302	107.199	35.223	48.867	72.43	123.656	74.441	120.359	63.957	43.758	59.531	107.293	41.223	71.172	62.547	68.125	83.986	46.979	68	70.576	41.073	74.601
	82	34.278	26.791	28.258	17.002	23.045	32.743	22.695	15.626	18.391	20.964	18.183	110.239	106.392	103.41	101.84	83.135	66.687	106.472	100.747	100.973	112.227	93.8	78.573	101.91	44.412	76.733	126.153	105.906	35.82	52.48	70.223	128.102	75.227	121.172	69.246	47.176	59.051	107.152	40.566	75.035	56.949	68.615	80.611	46.681	66.156	70.163	40.17	73.385
	83	32.567	25.93	26.551	17.288	24.904	33.224	22.174	16.979	16.948	21.043	18.65	111.494	101.421	104.831	102.459	85.016	71.767	109.049	101.84	103.373	107.557	88.471	78.569	105.047	43.506	72.541	126.329	105.582	35.754	47.75	68.594	121.156	77.223	114.695	64.781	43.668	61.445	110.43	43.758	71.293	62.031	68.319	83.052	45.948	67.181	69.785	42.951	73.681
	84	32.268	26.616	27.929	18.113	24.72	34.582	22.628	16.151	17.783	19.68	18.387	115.216	101.282	105.078	101.1	84.738	69.466	105.308	97.255	105.957	106.871	93.706	81.435	102.533	42.439	73.949	124.922	109.621	37.457	50.367	70.359	121.762	76.027	122.887	63.121	43.852	59.84	105.133	43.742	76.508	59.988	69.337	78.274	47.257	65.694	70.767	40.58	69.816
	85	32.807	25.651	30.226	15.241	23.618	32.494	22.856	15.581	19.202	21.74	19.097	110.043	99.271	100.665	100.845	86.355	67.685	103.583	96.849	99.745	103.031	94.984	81.851	100.549	44.729	73.812	121.431	102.508	37.965	50.859	78.461	125.086	72.512	118.93	69.922	45.758	60.828	110.125	43.91	72.957	61.641	67.816	80.385	48.111	66.601	72.017	39.337	71.243
	86	33.307	25.317	28.615	16.097	24.787	35.06	23.74	17.293	18.331	21.628	18.267	110.824	107.226	100.29	104.532	84.707	67.752	105.982	99.049	103.612	108.22	94.78	84.078	104.384	42.361	76.043	123.659	107.352	32.246	45.102	67.637	124.898	78.293	118.375	64.367	45.273	59.562	103.785	43.016	70.703	58.109	67.264	78.462	45.118	69.146	67.816	42.549	71.083
	87	35.14	27.439	27.316	17.733	24.917	33.621	22.77	15.738	15.574	21.561	18.075	113.467	105.233	100.051	102.827	85.191	66.035	104.142	97.095	100.839	106.114	93.231	84.616	102.478	43.533	71.773	123.439	99.805	34.48	51.082	69.656	126.902	75.758	119.609	64.648	41.605	63.77	102.805	46.789	79.543	55.977	67.271	81.201	46.601	65.451	67.646	37.691	69.531
	88	31.177	25.185	27.636	16.358	23.096	31.759	23.344	14.607	17.787	18.821	20.019	111.129	100.286	102.563	100.8	83.353	70.067	105.359	102.193	100.071	105	93.518	80.239	99.702	44.31	70.482	121.655	110.914	34.035	53.297	67.133	121.199	77.742	117.672	62.582	40.969	62.336	103.793	44.688	72.172	56.836	66.712	80.188	45.476	66.441	71.007	43.865	69.455
	89	30.366	24.895	26.536	16.052	23.266	33.101	22.241	16.164	16.869	20.548	18.2	112.482	103.67	102.35	99.009	80.089	65.96	104.891	97.047	99.047	105.522	91.902	84.996	103.067	41.922	74.051	125.192	110.363	33.332	44.867	69.93	122.344	73.105	120.441	66.219	43.074	56.773	106.773	41.93	72.691	58.367	65.351	82.83	46.083	63.528	70.215	37.149	69.16
	90	30.746	27.924	26.712	17.377	23.974	32.825	20.363	15.83	17.493	20.527	18.647	108.106	99.707	98.911	98.902	79.57	66.634	102.446	100.049	104.918	105.533	91.082	79.204	105.655	43.067	81.078	119.949	104.598	35.926	56.422	72.844	127.953	75.219	120.754	62.785	42.812	56.602	103.02	41.953	70.453	62.438	64.809	75.566	44.872	65	67.844	39.625	68.139
	91	32.035	25.471	28.634	17.889	23.675	31.242	23.929	16.282	19.135	20.118	17.508	105.455	101.725	97.326	100.377	81.59	67.175	102.029	95.701	100.796	105.298	90.278	80.494	98.949	41.098	71.271	117.878	107.105	37.172	51.781	68.207	127.531	80.664	120.996	66.855	45.227	59.973	96.699	43.582	69.844	60.312	66.354	77.719	44.896	63.51	62.5	36.368	72.885
	92	33.256	24.643	27.682	15.795	24.632	33.319	22.155	17.637	17.907	21.923	17.871	103.784	102.718	97.978	97.242	82.971	63.645	101.831	97.519	99.953	105.059	89.796	77.584	96.58	42.318	73.533	121.604	107.594	35.055	52.621	69.16	120.68	70.598	118.691	65.449	38.641	64.477	100.195	46.625	76.414	61.027	64.42	76.788	46.181	59.74	67.878	38.892	68.538
	93	31.37	25.06	28.181	17.403	22.762	31.385	22.712	15.185	18.374	23.161	17.224	106.451	101.987	101.357	99.497	80.479	65.978	102.736	95.086	99.004	106.588	96.067	83	101.055	40.557	72.541	121.553	102.469	34.012	53.379	71.559	120.523	74.738	112.859	64.785	47.477	56.059	109.406	44.059	70.859	55.387	63.448	76.5	46.396	62.25	65.021	37.215	68.524
	94	30.787	23.038	26.966	17.043	22.392	31.248	22.295	15.521	15.357	19.045	17.518	109.251	105.641	101.344	101.408	83.687	63.188	103.406	97.355	93.898	104.345	96.686	84.929	103.475	41.212	74.027	119.808	110.59	34.852	49.672	67.152	120.117	73.582	117.875	61.293	42.883	61	104.227	41.301	72.664	60.125	64.573	77.375	43.58	61.712	65.608	37.083	67.559
	95	30.394	25.774	29.793	17.247	23.9	31.702	20.55	14.981	17.735	18.951	17.901	106.624	100.22	98.235	98.06	82.51	65.169	105.29	97.437	105.412	103.365	92.639	81.192	99.055	41.431	67.882	118.267	100.996	37.266	50.887	69.152	123.797	74.004	113.488	57.188	39.723	59.738	103.512	45.035	70.941	60.25	63.101	73.622	44.431	62.517	66.635	41.25	68.99
	96	32.762	24.393	26.585	15.696	21.661	32.492	21.344	14.131	18.174	20.735	17.249	107.247	105.448	100.089	99.785	79.654	65.599	101.222	96.534	96.518	102.314	91.235	82.137	107.235	39.369	66.682	122.557	104.246	34.953	44.797	64.289	120.242	74.371	119.715	59.691	40.82	63.238	108.359	39.504	74.066	53.988	62.142	75.84	46.184	64.253	64.729	34.778	67.816
	97	31.768	25.615	26.151	15.253	22.559	32.334	22.323	16.103	17.269	21.486	17.189	104.624	107.45	98.153	99.08	81.92	68.237	103.224	98.987	98.643	106.667	84.914	78.184	99.678	40.863	72.251	119.49	101.93	31	44.832	68.742	117.664	71.734	120.102	60.895	41.312	60.77	109.051	39.43	72.293	56.145	64.344	73.931	42.295	59.566	65.844	37.889	66.253
	98	33.25	24.554	27.525	16.915	21.715	31.781	21.826	15.68	18.138	18.662	16.65	107.024	108.067	100.346	101.08	82.956	68.783	103.674	97.259	98.118	104.839	93.443	85.416	110.776	42.533	70.941	121.757	102.711	32.457	48.004	65.852	116.121	70.262	111.789	62.16	41.176	56.863	101.262	40.285	70.238	52.844	64.49	76.965	43.767	62.875	66.25	33.427	66.826
	99	31.311	24.344	28.151	16.819	23.657	31.563	21.553	14.31	18.454	19.342	21.413	106.298	102.175	100.572	98.528	83.202	65.583	104.355	95.905	103.843	106.173	92.09	79.82	103.765	42.894	70.608	119.855	103.719	36.422	49.074	67.969	118.219	70.293	118.656	54.605	42.738	56.004	101.02	42.98	71.262	57.094	64.587	76.142	46.076	63.562	66.188	34.483	65.441
	100	32.677	25.363	28.346	15.858	19.549	33.684	21.323	15.344	16.164	20.933	17.871	105.929	103.982	103.785	99.933	82.534	66.736	105.468	100.224	96.545	103.914	90.918	84.529	101.102	41.639	69.275	121.69	100.93	34.125	48.434	67.848	118.418	70.16	113.008	62.84	40.406	63.184	105.727	37.078	68.434	54.926	65.878	76.326	45.24	62.014	63.528	37.719	70.042
	101	30.638	26.499	27.108	17.16	24.463	31.495	20.946	14.662	17.826	19.693	15.374	106.063	105.193	98.188	95.33	81.993	66.373	106.197	97.288	98.059	105.91	91.718	83.129	98.42	45.149	66.329	117.737	103.285	34.777	45.508	64.398	119.699	71.262	113.992	61.281	42.84	60.68	101.109	41.277	73.184	51.238	63.715	72.573	46.809	60.497	66.389	34.299	66.066
	102	31.191	23.88	27.03	17.101	22.148	29.814	21.488	15.107	16.364	20.91	16.804	106.627	100.18	100.279	98.57	82.574	66.419	105.106	97.18	94.98	103.522	93.514	81.345	104.439	42.133	69.949	119.027	101.375	34.551	49.387	66.48	117.984	75.488	114.297	62.488	41.488	60.602	108.301	41.676	71.891	54.137	59.594	75.031	44.372	57.986	65.882	35.719	66.969
	103	32.465	25.004	26.893	15.042	23.502	31.628	21.406	16.778	16.91	19.449	15.325	103.322	102.636	99.772	98.078	81.576	66.858	103.279	96.792	99.329	104.012	88.694	83.933	103.118	39.812	71	119.729	104.008	32.316	47.719	70.605	115.559	69.543	110.766	55.941	43.121	58.594	100.297	42.367	67.457	57.871	62.42	74.326	43.191	60.312	64.031	33.09	69.101
	104	31.24	26.059	27.133	16.826	22.789	30.791	21.778	15.273	16.791	19.301	14.959	104.6	109.667	99.262	99.687	81.945	67.557	102.111	96.184	99.357	104.969	91.196	78.271	106.784	43.859	68.722	114.133	100.32	35.027	47.602	64.348	111.41	73.227	111.387	56.285	42.676	60.848	101.867	41.133	71.84	54.004	64.09	73.615	42.455	58.556	64.188	32.906	66.483
	105	29.126	22.971	26.305	17.214	21.213	30.705	21.258	15.899	16.598	18.492	15.766	106.78	98.869	99.386	98.796	83.59	66.313	99.998	94.038	100.573	105.424	85.647	76.086	102.514	43.31	68.686	118.067	104.066	34.316	47.617	64.215	119.809	74.242	117.715	60	40.109	58.328	99.633	39.758	67.039	54.109	62.017	71.938	42.101	62.247	62.913	33.569	68.17
	106	30.244	24.206	25.492	15.759	21.679	30.003	21.936	14.649	16.884	20.215	15.346	103.804	97.04	97.563	96.284	82.55	67.31	102.652	97.596	99.29	101.29	87.839	78.067	102.294	42.227	69.039	117.686	100.148	33.492	41.562	64.516	114.219	71.418	112.188	60.359	46.102	61.719	103.305	44.797	68.688	52.609	61.062	73.99	44.222	60.017	64.049	36.021	67.979
	107	30.657	23.305	26.893	17.601	22.138	28.533	20.301	16.26	16.865	19.129	19	103.722	100.133	102.091	95.47	81.162	63.734	105.718	98.286	98.773	104.341	92.043	77.529	102.667	39.125	65.706	120.459	99.387	32.359	48.141	67.199	114.027	71.266	108.008	53.289	39.902	58.777	99.535	41.855	69.203	53.512	58.892	71.108	40.622	57.92	60.538	34.892	66.701
	108	31.116	24.574	26.757	15.821	22.278	30.16	21.052	13.72	15.821	20.355	17.942	105.016	104.503	94.055	98.989	80.049	65.712	100.676	93.838	98.475	100.937	85.082	76.439	99.824	40.616	70.824	118.357	98.934	33.5	44.828	66.469	116.34	73.723	119.566	57.277	41.27	57.258	99.234	40.293	67.633	52.598	59.101	73.562	40.462	61.472	59.649	32.455	63.955
	109	30.809	26.247	25.806	15.87	20.807	29.26	21.31	14.869	17.75	19.245	16.918	107.278	97.177	95.333	93.858	76.368	64.989	102.377	100.707	93.647	103.667	86.859	76.184	103.533	40.518	71.114	113.8	104.137	33.422	50.984	62.863	110.555	72.93	108.461	56.258	39.812	60.867	99.852	41.496	73.883	55.578	58.729	68.698	40.941	55.878	61.792	34.108	65.462
	110	29.38	24.715	28.073	14.792	21.87	29.136	20.271	14.964	16.09	19.406	16.499	103.631	101.086	96.647	97.217	79.592	63.552	103.878	95.956	94.063	104.063	87.027	78.933	99.804	40.102	73.973	118.2	98.641	36.008	44.613	62.727	113.93	69.68	113.008	57.59	42.039	60.848	101.352	39.281	69.789	55.957	59.719	70.781	45.274	58.201	62.368	39.24	65.622
	111												103.133	103.126	96.991	92.685	77.634	62.126	99.492	92.71	91.929	100.2	85.388	77.969	97.082	42.89	66.027	114.012	97.227	32.98	45.086	64.75	114.488	70.496	113.945	51.418	41.23	54.141	96.711	39.859	66.305	53.617	61.177	66.677	41.431	58.816	60.441	33.153	65.67
	112												102.89	101.135	97.268	94.827	77.856	63.856	100.038	93.863	93.569	99.592	88.953	77.125	102.475	39.271	64.678	115.537	95.078	32.988	42.113	64.711	111.695	68.977	110.277	57.105	40.957	55.258	100.617	38.457	69.258	49.516	60.462	72.75	43.917	58.719	58.826	31.017	66.552
	113												103.439	99.834	96.929	93.14	76.494	62.98	103.257	97.109	94.024	101.961	90.6	77.863	104.576	40.737	66.569	117.333	100.414	31.891	45.727	65.883	108.965	70.754	107.137	59.254	38.223	53.27	101.555	39.922	67.02	55.32	58.674	70.941	41.944	56.545	59.806	34.288	65.493
	114												99.255	101.246	93.588	93.625	84.237	64.16	100.843	95.271	97.38	102.459	90.859	79.549	101.486	41.424	69.043	117.443	100.977	31.152	46.703	60.676	111.516	67.941	108.062	57.523	41.781	56.516	100.172	39.871	68.422	51.98	58.503	70.333	41.278	57.264	59.167	31.67	63.226
	115												101.906	103.965	95.962	93.47	80.506	63.749	103.931	94.712	97.396	103.659	83.624	78.843	97.012	40.29	66.333	113.227	98.262	36.273	44.879	67.098	117.738	74.367	112.465	54.48	36.645	56.633	101.191	37.715	70.648	49.188	60.701	66.312	40.309	57.368	60.917	33.788	63.778
	116												98.867	100.381	96.375	93.033	78.302	66.122	102.843	96.716	96.176	102.365	91.243	82.294	102.831	38.506	62.929	112.165	99.328	34.961	41.832	66.195	116.426	72.324	113.691	59.133	39.34	54.551	100.492	42.359	65.312	54.988	55.823	68.608	42.264	56.601	58.399	34.767	63.944
	117												99.976	102.386	98.916	91.002	81.151	64.299	98.537	92.694	92.329	104.404	87.345	79.345	97.804	37.996	72.035	115.216	97.273	34.207	48.531	60.309	109.637	68.371	112.41	59.641	44.125	52.496	103.832	38.953	67.504	52.43	57.844	68.396	43.819	56.358	59.128	31.326	63.677
	118												100.847	104.095	95.931	94.563	79.692	64.927	102.809	93.397	96.094	103.314	88.216	82.384	101.604	37.098	68.427	115.063	93.297	36.227	46.988	60.578	116.109	69.367	112.188	55.23	36.793	57.109	100.785	39.195	66.789	49.617	58.615	69.337	46.01	57.299	58.028	34.736	64.896
	119												97.996	102.47	101.47	94.049	79.279	64.829	102.384	93.818	95.761	103.11	88.329	78.757	99.384	39.902	62.804	113.396	95.895	34.148	42.242	63.898	111.84	69.336	108.75	59.742	40.844	50.906	100.609	37.719	65.168	52.199	58.528	68.625	42.535	53.163	57.906	36.083	62.802
	120												97.878	99.399	96.401	93.659	80.654	63.421	99.858	93.636	93.725	100.482	85.557	76.698	103.78	39.067	74.812	111.529	95.715	31.199	46.078	69.77	110.754	68.574	112.258	61.484	40.453	56.848	97.938	44.5	66.484	52.547	56.26	68.5	41.719	56.368	56.622	34.715	60.253
[truncated: 767 more columns]

## Sheet: Fig. 11 D % FM released
% FM1-43rleased after 90 s
Pclowt/wt	Pclogt/gt	Pclowt/wt + Pclo-Znf1	Pclogt/gt +Pclo-Znf1
21.2119	11.779	22.1663	47.6333
25.3747	26.1632	41.2599	22.6201
50.3176	11.2052	45.7753	28.8104
33.2692	34.7243	39.9799	40.7607
43.6152	2.48721	54.6003	50.0653
56.8879	1.17803	26.4025	52.3256
51.4246	8.70591	67.1909	40.0152
38.2368	45.7626	34.4158	49.6744
39.3013	43.9162	45.5924	29.5895
37.9246	-13.8789	71.8666	51.2924
60.3389	19.7805	70.8899	33.5632
38.3045	51.1147	50.6973	62.4293
26.3116	40.1568	35.7624	66.8815
20.2935	24.7524	29.9073	49.9493
20.8212	45.7626	29.6296	79.0111
30.0522	5.83757	30.7952	72.2968
21.8568	62.3514	26.9386	76.9013
21.7175	55.4046	65.2455	52.0284
16.728	57.6592	70.1341	72.9245
31.6679	36.7538	45.4261	46.4205
31.4032	37.9761	51.4864	65.5261
41.273	30.8815	14.9477	54.6235
36.2518	27.8244	43.7672	31.2577
7.62055	36.0761	22.8648	36.2967
43.6246	45.7146	44.6299	28.0316
28.3005	30.4723	39.7318	32.3858
28.5894	45.2878	46.5624	28.9
51.2504	28.3213	25.4411	47.435
42.2988	35.6584	52.9035	51.6031
45.648	38.4609	49.0533	38.0157
48.1807	20.4529	35.9564	27.7054
53.4056	8.58347	41.2268	72.8443
55.9158	54.5718	40.0496	62.8506
52.2983	65.5916	19.0266	70.5575
53.5848	74.5702	32.461	58.4659
54.8027	71.4977	23.9408	54.5343
48.4655	57.8209	14.0812	67.9214
52.6323	58.5081	17.0327	39.2938
36.1785	51.8317	17.877	41.7076
67.423	55.1787	7.96734	60.6023
65.7997	40.8463	30.8819	50.6381
63.3181	33.675	22.3768	53.4869
62.1237	31.3773	34.4828	65.5929
55.7018	17.5967	30.9322	57.6009
61.9393	24.8286	34.2578	53.0267
62.0021	52.1239	59.6789	44.2278
73.9722	62.7786	63.1733	41.577
62.8085	61.1299	64.6012	49.5186
53.0325	33.8672	65.2503	36.2047
62.8938	34.0354	56.1226	33.6216
65.3751	12.5882	55.3227	32.3101
73.3934	22.9167	59.8429	40.5801
46.4247	33.2418	58.3689	40.6898
35.8987	24.5731	32.356	37.8825
40.9242	44.4582	25.2873	34.0663
25.2236	50.5226	16.453	37.7593
34.103	32.1751	19.4364	32.9896
65.7028	29.7179	28.184	35.5992
60.8854	14.223	19.6332	35.1899
64.9178	57.4369	42.9169	36.4952
70.5928	37.6738	35.0822	50.7369
52.2536	55.0391	9.06567	41.4105
39.4571	38.092	38.4536	56.1803
47.151	47.3149	40.1865	68.0464
36.3786	33.825	56.2062	56.3465
25.8642	36.2867	52.5709	47.782
23.8892	25.5931	49.2611	59.7163
32.1356	24.0638	60.2086	61.827
48.7922	20.2788	49.6446	60.5572
57.8839	28.5719	29.4538	50.2091
29.2687	51.438	23.4749	47.4391
53.8049	61.6987	31.2585	43.9402
20.6705	62.6083	28.3582	55.9903
21.153	31.0905	22.448	53.7805
48.8475	22.2087	35.6863	66.9354
23.7169	35.8057	58.0225	62.7391
25.5818	30.1629	28.5765	62.0352
26.5323	43.87	24.6691	59.5553
33.6215	28.6095	4.96605	55.1941
11.7481	13.349	10.7881	56.8524
55.8687	26.0861	15.8392	51.6282
65.2818	16.7634	29.4412	57.0095
62.7402	57.5484	53.3275	52.7752
65.6655	37.1511	50.0856	53.7963
68.1723	38.811	40.0025	63.975
74.1988	69.9237	51.068	57.7398
47.1207	59.7491	60.9059	56.8833
71.4661	50.3317	47.7849	54.3383
69.424	57.906	59.9401	53.9927
32.7903	71.9447	29.1101	51.4086
53.3498	71.5164	19.1387	53.7085
70.6729	71.4351	17.1939	49.5203
45.4089	72.1827	26.6619	59.607
68.2401	66.2735	53.6134	49.9741
63.985	65.3959	72.7303	43.1816
57.7057	63.9667	57.5585	38.1893
50.5526	68.2394	48.9803	55.9001
32.9564	62.13	47.7196	51.477
45.1707	70.6296	45.9372	57.4317
40.7992	65.566	57.2315	61.8757
60.2196	29.442	51.0653	39.3403
60.6279	46.9603	49.0988	43.282
57.7034	34.9137	61.015	28.875
61.959	49.6162	48.3677	31.4492
39.8342	0.959539	42.3357	25.6037
33.3131	29.6498	71.5061	42.2551
48.5639	27.292	63.9702	34.6429
51.7307	25.6347	42.0884	39.7509
39.7121	44.8441	60.0584	27.3502
34.9887	31.2527	47.9861	27.4964
36.5373	20.916	61.9797	57.192
52.0964	53.7562	57.1368	45.5942
54.3789	45.754	38.7189	69.8268
45.7285	8.63386	49.1271	59.6243
64.3566	49.625	48.402	68.9135
53.6623	2.41872	40.0935	55.1914
49.5637	42.7728	54.3777	35.129
64.3707	24.4	55.7767	44.2674
68.2891	38.0701	53.5912	66.7468
53.7863	40.2593	39.4321	54.0108
73.888	12.8356	47.024	48.5139
73.3058	22.1176	47.207	56.1799
68.3663	37.3892	47.1352	69.6493
60.4957	31.7182	56.566	44.5561
64.1547	26.3218	55.3501	44.3631
53.5471	50.3595	41.617	69.0543
56.8292	37.7303	53.0936	74.0659
73.4742	40.1548	53.7424	43.0901
66.0906	40.0331	47.885	43.3856
65.5486	24.9308	57.7364	67.0243
66.1851	64.0466	51.296	67.4044
50.7934	55.5793	50.8052	61.4589
58.4012	53.6331	41.6695	60.9508
60.5963	53.7376	53.052	48.5405
51.7273	56.9534	43.3886	46.8863
38.7002	51.3927	60.7031	52.6985
63.6332	57.8312	55.3388	55.4724
48.2975	62.1437	64.3745	50.8782
61.3097	52.7598	48.066	52.3093
65.3866	48.4864	52.8918	43.9454
58.9829	55.2643	54.5348	29.9328
64.2938	55.8382	67.8806	28.1089
71.4894	51.0669	65.5964	32.0193
62.0572	51.188	62.9537	29.8094
54.9096		68.0624	34.5615
64.6057		51.3521	51.1296
59.0658		53.7766	30.121
44.4792		66.5392	27.8261
44.8736		60.4442	36.6773
42.5559		57.1966	37.2206
69.7119		44.3285	45.3008
55.4278		61.1732	35.2717
54.159		60.7727	45.3528
57.8555		57.9487	30.8054
59.5037		42.216	39.1972
61.0972		53.6662	39.1675
69.3511		36.7781	53.4705
63.2714		43.4433	26.6275
66.5277		37.0152	49.3402
53.3356		40.345	52.61
65.5339		41.4444	37.5941
70.7541		55.7692	29.5648
70.5443		54.9857	27.7134
54.165		52.2908	37.0023
59.6921		55.1381	36.0574
67.1978		48.2638	39.4558
42.2502		57.8119	43.3702
38.8529		46.7346	30.1287
64.0044		51.8793	24.593
68.7494		54.1628	72.5026
66.4863		52.1649	52.7065
52.862		53.253	55.5536
67.8248		52.8951	45.4147
68.2773		47.7329	46.7556
78.7814		57.7372	52.975
59.3218		68.6878	48.736
56.5611		61.0241	54.6872
69.682		63.2104	49.7608
58.301		56.4602	64.5919
75.6295		70.1361	65.6915
65.9236		62.2367	53.1941
54.5933		49.6003	49.3393
65.4874		50.8251	53.8058
64.8465		59.1428	50.4805
56.683		56.635	49.956
54.906		40.5117	55.4854
51.9763		54.4811	54.3398
65.8122		51.7768	43.1283
57.8598		54.2153	56.0278
59.8282		71.3092	48.3871
65.1636		58.3458	48.5236
64.0669		50.2416	49.1244
68.0125		52.3309	46.7118
69.7409		54.7865	60.5683
60.9563		66.2338	60.3446
61.6866		54.2206	46.7346
62.106		73.8734	43.8484
46.6492		64.3057	57.4683
31.6156		46.0741	54.412
69.6994		31.8589	49.5032
42.3972		67.8178	62.0393
21.2438		66.1831
79.4592		74.1873
46.2541		66.9804
66.2493		76.7563
73.8197		46.4838
51.7078		70.6943
68.9951		68.8689
69.7312		26.0651
44.4957		12.5955
73.1586		18.9636
62.583		22.1457
56.251		51.4292
		65.4082
		69.192
		67.8263
		79.2316
		52.246
		71.947
		51.586
		63.0542
		55.1542
		58.9151
		54.2432
		54.6161
		45.7776
		58.6925
		58.6922
		53.3862
		42.2475
		54.0794
		58.0666
		50.0308
		52.6768
		53.5215
		66.8693
		65.6334
		58.5755
		36.0124
		69.4328
		48.3592
		50.122
		44.9974
		50.1323
		48.491
		57.1939
		50.1238
		67.8028
		56.4322
		67.1432
		41.6543
		71.0336
		65.6538
		59.1657
		64.5143
		70.1174
		72.1681
